# Supplementary material for: Multi-Omics Mendelian Randomization Integrating GWAS, eQTL, RNA-seq and Cell Line Experiment Reveal GLIPR1 and ARHGAP11A as Potential Targets of EGCG for Nasopharyngeal Carcinoma
Source: Research Square preprint supplement (doi:10.21203/rs.3.rs-6957738/v1), 2025-07-16
Supplement: Supplementary file 1 [file 9d397317f104ae465d3bc5e4.xlsx]

## Sheet: Table S1
Table S1: Differential expression analysis on EGCG-treated HK-1 cells
id	logFC	AveExpr	t	P.Value	adj.P.Val	B
MVD	3.18196537254218	13.6444916764656	65.5299621050034	7.85154768725004e-10	1.30963815423331e-06	13.5089987374454
HMGCR	2.66280769629272	14.2772243049402	54.1815137876837	2.46610192217999e-09	1.75588307256227e-06	12.5344937354276
DHCR7	2.3694351143494	17.8403030290852	51.9993146533956	3.15806308014797e-09	1.75588307256227e-06	12.3114008424247
LPIN1	2.36916	13.7275067263851	47.200519210944	5.65373195249982e-09	1.82507688015846e-06	11.7704695029601
MEX3B	2.36996486387675	5.10551500803914	46.3515673699305	6.30567111534971e-09	1.82507688015846e-06	11.6668051716975
HMGCS1	2.65710164146705	12.8677747305531	45.639138777493	6.92112883768828e-09	1.82507688015846e-06	11.5778005675732
TMEM97	2.43554410894543	13.496532248781	44.8763630151529	7.65919554023334e-09	1.82507688015846e-06	11.4804053535282
CYP51A1	2.17429056874455	14.4534309000684	41.7659080826259	1.17946568010773e-08	2.24484907879407e-06	11.0592274188022
INPP5D	-2.12174	10.7230593810517	-41.1808	1.28382193770747e-08	2.24484907879407e-06	10.9753960220795
NEU1	1.96008682457092	12.8774941619129	40.1387868895962	1.49754056572183e-08	2.24484907879407e-06	10.8222392656977
IDI1	2.23814480319884	13.0845912555604	39.6674393961234	1.60767297272406e-08	2.24484907879407e-06	10.7512761531891
DHCR24	2.13961894982384	14.5848659259462	39.3620278264355	1.6840768721644e-08	2.24484907879407e-06	10.7047197115797
LSS	3.98432014917798	9.93034872924636	39.1127657678257	1.74958261536708e-08	2.24484907879407e-06	10.6663816544042
RHOBTB3	-2.40788	11.1800595429992	-37.7226	2.17434593911769e-08	2.59057787603451e-06	10.4467680966507
FOXQ1	-2.14297	13.1177117856291	-36.7899	2.52707232488555e-08	2.81010442527273e-06	10.2936689323864
RTN4R	1.90570994832878	11.7207988104505	35.6893996064705	3.03247938646063e-08	3.1613597603852e-06	10.1067378649016
IFI44	-1.60063	12.5366679007789	-33.8839	4.14094298564072e-08	4.06299582355807e-06	9.78429322726954
MTSS1	1.97926072752344	7.20529035967854	32.9600348689772	4.88792876649103e-08	4.52948065694835e-06	9.61117713850038
TRIB3	1.6881715972716	15.7446468304815	32.3823825738628	5.4347699489955e-08	4.77115593417078e-06	9.4999717701453
MYLIP	-2.85929	10.2485324207308	-31.7404	6.12813552464515e-08	5.11086502755406e-06	9.37359834859607
SNORA33	-1.72381	8.56571402089873	-31.1434	6.86701216509078e-08	5.45436966255782e-06	9.25334826010802
PLEKHA6	4.32888589911929	10.6091188852498	28.4392823997799	1.18339294497277e-07	8.4197188252564e-06	8.67296101244838
JDP2	1.60700783873337	13.139133132187	28.3896	1.19585986323958e-07	8.4197188252564e-06	8.66170149388124
SQLE	2.25944988440697	15.0904022219196	28.1570446099247	1.25622209339244e-07	8.4197188252564e-06	8.60875426340006
NCF2	2.10393809157921	9.9818625701197	28.1356659606108	1.26194826517632e-07	8.4197188252564e-06	8.60386100106872
BHLHE40	1.90220562464058	11.1841246745524	27.7107138829117	1.38233148994381e-07	8.56096977405874e-06	8.50571079443325
HIST1H4H	2.24183271551908	9.01984310105932	27.699221086985	1.38576848860663e-07	8.56096977405874e-06	8.50303268961311
SLC2A6	1.97827778861571	11.8498377577383	26.4373878151857	1.83175599909151e-07	1.09120321660165e-05	8.20112435735765
APOBEC3G	-1.7157	8.63319438161366	-26.0174	2.01588846088317e-07	1.15948343198384e-05	8.09704204878295
ACSS2	3.11396987970172	12.567042354075	25.8346684294246	2.10268340039818e-07	1.16909197062139e-05	8.05116774275724
WIPI1	1.89463031569536	12.4093574899469	25.3338257015348	2.36379794353295e-07	1.25639512068104e-05	7.92356905145904
PTGS1	-1.67096	13.365355331335	-25.1716	2.45631636857745e-07	1.25639512068104e-05	7.88165063601903
INSIG1	2.58662399180879	13.2525134030863	25.0383972012232	2.5354938707322e-07	1.25639512068104e-05	7.84698746993943
CTSB	-1.86577	10.8006462126766	-24.9722	2.57592602014154e-07	1.25639512068104e-05	7.82969372896069
TFRC	2.51613490032545	14.3579009578256	24.8755665357571	2.63632069687268e-07	1.25639512068104e-05	7.80435085445841
RIMS3	-1.96032	5.02698552244786	-24.3071	3.0268690062363e-07	1.40244930622282e-05	7.65304744925099
HCAR2	-1.53807	8.84729135247979	-24.1706	3.13040020749007e-07	1.41121825570093e-05	7.61615135842082
ACLY	1.87513672360924	13.2237366070809	23.8174729866952	3.41803332201201e-07	1.46036197653629e-05	7.51960708420388
MVK	1.92598115503931	15.9539558029867	23.725330608134	3.49807534516155e-07	1.46036197653629e-05	7.49415864895083
SLPI	2.35425984586899	9.30299238469168	23.6835479425489	3.53508892810991e-07	1.46036197653629e-05	7.48258337042114
FDPS	1.86282721086117	17.3132071691604	23.6229112463611	3.58961876726547e-07	1.46036197653629e-05	7.46574526732553
DDX60	-1.95336	10.3821476225771	-23.3411	3.85622327263605e-07	1.51070374280739e-05	7.38687898170633
MMP1	-1.77855	14.0600614522475	-23.185	4.01383972483954e-07	1.51070374280739e-05	7.34273646001788
DDIT3	1.46157443436667	10.6248136939802	23.1547431684993	4.04526911823106e-07	1.51070374280739e-05	7.33414
CYP1B1	-1.88481	13.4878508699489	-23.1257	4.07563959390484e-07	1.51070374280739e-05	7.32589195913245
TM7SF2	2.4611265849178	9.84747677688451	22.915819035404	4.30359578297075e-07	1.53020552609935e-05	7.26585834747711
FDFT1	1.20629214580737	15.3939421939259	22.9085687149502	4.31173019944062e-07	1.53020552609935e-05	7.26377432910249
ANP32E	-1.12879	11.7106643150239	-22.8118	4.42208035244856e-07	1.53667292247588e-05	7.23587860216814
C1QBP	-1.18274	17.0254469437806	-22.5923	4.68466673284311e-07	1.59469879803721e-05	7.17215896566629
SQSTM1	1.06789962687408	14.8102657656702	22.3887569643505	4.94449299338222e-07	1.64120553348402e-05	7.11247744968524
ABCA13	2.03656611328475	9.62445232686348	22.2763782723191	5.09514300906087e-07	1.64120553348402e-05	7.07927144695575
STARD4	1.68335642957348	11.489947904468	22.2607835354283	5.11646808999814e-07	1.64120553348402e-05	7.07464925534075
DPYSL2	1.30878321359442	10.441790790632	22.1626246901675	5.25310629903951e-07	1.64134247830679e-05	7.04547552109217
C11orf31	-1.44944	15.1838274365868	-22.12	5.31369867077739e-07	1.64134247830679e-05	7.03277668715795
ABCB4	2.77750266543607	5.45466046641179	21.7045885943209	5.94963582491337e-07	1.76664355346863e-05	6.90748787490689
SNRPA1	-1.43292	13.8658711613887	-21.6946	5.96599050624702e-07	1.76664355346863e-05	6.90444270432182
NGFR	-3.11672	10.759369180147	-21.6327	6.06839734813277e-07	1.76664355346863e-05	6.88555991977095
PSRC1	-1.35997	11.8401386123148	-21.5884	6.14300516194128e-07	1.76664355346863e-05	6.87199960576237
HSD17B7	2.08549606476547	10.9978818186715	21.5116401199467	6.27486105495701e-07	1.77397766774039e-05	6.84842618876511
AQP3	-3.38675	9.50543891797975	-21.4303	6.4181468097772e-07	1.78424481311806e-05	6.82335636967323
FASN	1.08552229277985	14.7336608413716	21.2912749909055	6.67192786502306e-07	1.7963166429022e-05	6.78027783835888
NUDT6	-0.969105	10.3038414630988	-21.2886	6.67695634651896e-07	1.7963166429022e-05	6.7794406828912
TNFAIP2	-1.14288	15.7932019608163	-21.2218	6.80316787417754e-07	1.80121968478224e-05	6.7586296744204
DNAH11	-1.1227	10.5325034601763	-20.863	7.53031615093041e-07	1.96258864683624e-05	6.64567827453238
OAS2	-1.41057	11.1130338471001	-20.622	8.06982499815232e-07	2.04655005291238e-05	6.56862207951698
LIPE	1.90596440074495	12.9462453826557	20.6017	8.11719501840764e-07	2.04655005291238e-05	6.56210092055021
PFKFB4	1.59920905123393	10.1536664235659	20.558009241451	8.22055476889265e-07	2.04655005291238e-05	6.54800133888034
RTN4IP1	-0.966215	12.5509319950583	-20.3565	8.71692931044116e-07	2.06606526568085e-05	6.48263808448016
AMIGO2	1.20451698469086	14.123614278323	20.3500585317763	8.73340538731785e-07	2.06606526568085e-05	6.48053201110098
FAM83D	-1.05395	13.4046149833834	-20.3325	8.77844772366295e-07	2.06606526568085e-05	6.47479437206061
PTCD3	-1.10884	9.19889433269928	-20.3263	8.79440250979257e-07	2.06606526568085e-05	6.4727689652193
SESN2	1.0453531340787	10.7464855271167	20.2237003132609	9.06320890438842e-07	2.09964339618332e-05	6.43917947991082
SKP2	-1.35753	10.7663031613961	-20.0676	9.49095833920347e-07	2.13288679866737e-05	6.3877047075261
KATNAL2	-1.52456	8.20511483176513	-20.0363	9.57944163663538e-07	2.13288679866737e-05	6.37734305711199
CDCA7L	-1.46677	9.16645462778507	-20.0325	9.59031833933172e-07	2.13288679866737e-05	6.3760758900727
MRPS9	-0.901251	14.2762070199308	-19.8104	1.02478812698253e-06	2.24914025764061e-05	6.30199041730372
SPINK2	-2.1709	5.06433685432287	-19.56	1.10531103965386e-06	2.34278781614213e-05	6.2174139246194
GPT2	1.36618630704407	11.2720689829286	19.5495543753222	1.10882049188425e-06	2.34278781614213e-05	6.21386767799045
ADA	-1.47131	13.0202161808615	-19.5167	1.11995146734188e-06	2.34278781614213e-05	6.20269291055719
LIMK1	-0.871971	13.1760010485599	-19.5059	1.12363924035594e-06	2.34278781614213e-05	6.19901481411583
FAM209A	-1.38269	9.06619954552098	-19.4295	1.15016550279741e-06	2.36848896131616e-05	6.17290436103963
DFFA	-0.885092	12.4114	-19.2075	1.23149621918062e-06	2.50504352877228e-05	6.09640596447878
HMBS	-0.878338	14.3681768678934	-19.12	1.2653536015745e-06	2.54290338244129e-05	6.06602231720298
FOXD2-AS1	-1.21196	7.53960644434688	-19.0253	1.30321971349135e-06	2.5682151227609e-05	6.03297891345034
HMOX1	2.33797970147887	12.0866967569535	19.0118038739416	1.30874271843331e-06	2.5682151227609e-05	6.02823881004588
ATP5G3	-0.850474	17.9711148785287	-18.9416	1.33782748602485e-06	2.58419795448527e-05	6.0035986644899
NIPAL4	-1.93195	8.38123665003766	-18.9178	1.34787303381426e-06	2.58419795448527e-05	5.99521112891359
C12orf73	-1.00417	11.144594022731	-18.8388	1.38175718599981e-06	2.61905793891783e-05	5.96736847430448
ACN9	-0.967473	12.6892341569489	-18.7739	1.41037767834973e-06	2.64326962639027e-05	5.94437196706554
NCR3LG1	1.15250677321283	10.9211864989446	18.7231610547769	1.43323522924081e-06	2.65626262485963e-05	5.92633502178928
IFI44L	-1.75335	9.5689462548771	-18.5585	1.51040231442826e-06	2.7685176488641e-05	5.86747700518887
DNAJB9	1.36186172266542	11.7838189837094	18.4866180592682	1.54561134227602e-06	2.77581373975436e-05	5.84160352191479
GNB1L	-0.957675	13.1381919792476	-18.4825	1.54766593403571e-06	2.77581373975436e-05	5.84011175551261
ASNS	1.2665416732951	16.9035508902642	18.4474091308865	1.56521352747847e-06	2.77656769983035e-05	5.82745030854757
XBP1	0.950435566629137	14.8786225384698	18.4155028067849	1.58137848611441e-06	2.77656769983035e-05	5.81591015427429
POLE2	-0.87341	12.039690156654	-18.3705	1.60450774577839e-06	2.78036780078537e-05	5.79959954498564
RAD51C	-1.04442	13.1410377062522	-18.3467	1.6168805556126e-06	2.78036780078537e-05	5.79096956630647
GPD2	-0.991844	11.6200029719361	-18.3134	1.63444227520881e-06	2.78188746433499e-05	5.7788318778761
NMT2	-0.926853	10.3047489558559	-18.2637	1.66097720560281e-06	2.79849492822776e-05	5.76073502560193
GSR	-1.03192	10.7707178778214	-18.2189	1.6853942636178e-06	2.81123763171448e-05	5.74433353911105
SH3BP1	-1.02611	9.87613650471033	-18.1259	1.73731659913741e-06	2.86915256174376e-05	5.71022405016452
CDC20	-1.14446	13.5774937747678	-18.0542	1.77867006330881e-06	2.86917780990302e-05	5.68377175691345
CGN	-1.36205	10.3017599098615	-18.0424	1.78558175415196e-06	2.86917780990302e-05	5.67941005405317
MAP1B	1.30112978459944	8.31893011742518	18.0366888073861	1.7889358047357e-06	2.86917780990302e-05	5.67729946019754
SACS	-1.00989	10.7591610100849	-17.9934	1.81459076402726e-06	2.87454259791192e-05	5.66128401720972
SLAMF7	1.94425076907745	9.26621601181517	17.9731935164634	1.82674769411669e-06	2.87454259791192e-05	5.6537730020723
C12orf60	-1.02932	10.4138072133115	-17.7761	1.95021025935629e-06	3.00778318210476e-05	5.58017951902068
TMEM55B	0.927151488466778	13.0252952443789	17.7566429664285	1.96288198712622e-06	3.00778318210476e-05	5.57288890601973
PHGDH	1.16774360444833	13.0805777768638	17.7291018808356	1.98102788755452e-06	3.00778318210476e-05	5.56252949827146
ARHGAP11A	-1.8404	9.69562154824977	-17.7217	1.98595519305037e-06	3.00778318210476e-05	5.55973274193986
RBM26-AS1	-0.898822	10.0779313699194	-17.6983	2.00158233341504e-06	3.00778318210476e-05	5.55090795563972
C6orf136	-0.858235	11.4166656699357	-17.6457	2.0372074604825e-06	3.02724271180688e-05	5.53104253593474
IDH1	0.984117380470396	14.257703854652	17.6187842803378	2.05569576307863e-06	3.02724271180688e-05	5.52086819734561
F12	-0.836231	13.3319919379329	-17.5996	2.06897883181046e-06	3.02724271180688e-05	5.51361414882911
MMAB	1.64229473923292	10.6904441803557	17.520928659978	2.12468014358554e-06	3.03925195931602e-05	5.48368894209459
HSP90AA1	-0.82397	18.2306803723128	-17.5157	2.12845033734369e-06	3.03925195931602e-05	5.48169159550215
ATP5G1	-0.956631	15.5125363737559	-17.511	2.13184939592311e-06	3.03925195931602e-05	5.47989386769981
PMEPA1	1.72483241655989	11.0741120169154	17.4194829484521	2.19905499817074e-06	3.08231324162771e-05	5.44492073437812
INCENP	-1.02473	12.2559534039464	-17.4093	2.20668304016054e-06	3.08231324162771e-05	5.44101827292917
PPAP2C	-1.17072	10.9617148172454	-17.3821	2.22725148915432e-06	3.08231324162771e-05	5.43056179956667
UQCR10	-0.860252	16.746687398479	-17.3706	2.23597063691219e-06	3.08231324162771e-05	5.42615804748132
BHLHE41	-0.945616	10.9162450093206	-17.2402	2.33803128619675e-06	3.17198006888002e-05	5.37583936753187
DHTKD1	-1.11262	11.3629193123289	-17.2389	2.33905005079282e-06	3.17198006888002e-05	5.37534813754038
CLIC4	1.20615127122448	11.3770828800391	17.130009362964	2.42851615090341e-06	3.24046634071619e-05	5.33301559106437
RBM12	-0.996978	9.79279696233334	-17.1078	2.44720937643288e-06	3.24046634071619e-05	5.32436594509292
LDLRAD3	1.82982290978333	5.20896500619701	17.0965005745448	2.45683532046753e-06	3.24046634071619e-05	5.31993737514463
PLA2G4A	-1.07824	11.5506009928658	-17.0715	2.47821803655656e-06	3.24046634071619e-05	5.31016112052846
TMBIM1	1.05736398010725	13.7234558476695	17.0616592045203	2.48668879863113e-06	3.24046634071619e-05	5.30631135531396
UQCRB	-0.783422	16.2075987120916	-17.0326	2.51192543495842e-06	3.24797800427181e-05	5.29491845269209
FBP1	-1.43947	9.57406695336183	-16.8961	2.63443211599434e-06	3.33996069851122e-05	5.2411778364802
HCAR3	-1.9129	13.0440987744231	-16.8698	2.65882632630304e-06	3.33996069851122e-05	5.23077296369521
NRG1	-0.813323	12.5195985271518	-16.8622	2.66596116046997e-06	3.33996069851122e-05	5.22774762086896
NPC1	0.879032817581837	11.3324259627704	16.861127291264	2.66694431243455e-06	3.33996069851122e-05	5.22733136985081
DYNC2LI1	-1.00733	9.27304016089628	-16.8438	2.68318185611813e-06	3.33996069851122e-05	5.22047856396897
NAB1	-0.780076	12.4168846928528	-16.8132	2.7122498747659e-06	3.35113540082186e-05	5.20831288942663
CKS2	-1.05153	16.7466047116786	-16.7736	2.7503234836956e-06	3.37319086088548e-05	5.19257221679428
TRIM59	-0.946675	12.2102288549852	-16.7367	2.78639044223598e-06	3.39248120996323e-05	5.17785912960215
MLXIP	0.933464824581758	13.8311303868315	16.6961707171654	2.8266820759084e-06	3.41591008094878e-05	5.16164427129582
BORA	-0.768907	12.5396464859665	-16.6484	2.87499080311944e-06	3.41591008094878e-05	5.14250244355585
DIDO1	-0.995008	10.3696222834668	-16.6427	2.88078947247199e-06	3.41591008094878e-05	5.1402262503595
THBD	-2.17699	14.4190794482815	-16.6361	2.88754988857181e-06	3.41591008094878e-05	5.13757826420258
PARPBP	-0.823545	12.3998280563608	-16.6162	2.90809683857485e-06	3.41598980756539e-05	5.12956780215965
NDUFA8	-0.888492	17.7535172160547	-16.5752	2.95089051586804e-06	3.42606865829358e-05	5.1130628239804
SNORD100	-1.14217	10.2255398632353	-16.5649	2.96178094290432e-06	3.42606865829358e-05	5.10890040917263
POMT2	1.05848207707558	12.0712176564671	16.5372691977085	2.99116920154041e-06	3.42606865829358e-05	5.09774325091241
DSCC1	-0.763611	11.6992480718876	-16.5301	2.99883707500517e-06	3.42606865829358e-05	5.09485004724152
PANK3	0.926873890240765	10.8580239637512	16.4925375105346	3.03946307810606e-06	3.44886014576933e-05	5.07964260609409
ARL4C	-1.26123	13.5083279031849	-16.453	3.08289045762887e-06	3.47450086711146e-05	5.06360783789904
RHOBTB1	-1.15623	9.80589700677907	-16.3752	3.1705091593243e-06	3.54926797164626e-05	5.03192712004144
AURKA	-0.946353	13.6683914435901	-16.3359	3.21581219268229e-06	3.5759831582627e-05	5.01588562013032
LDLR	0.921953152520627	16.2032426365798	16.3147955642616	3.24053491167744e-06	3.57961075011786e-05	5.00722575103905
CENPP	-0.881205	12.2992557371827	-16.2945	3.26441885527903e-06	3.58227016487198e-05	4.99892169889906
TANGO6	-0.824337	12.2818214158819	-16.2514	3.31591999868446e-06	3.5844925250624e-05	4.98121880952938
S100A1	1.12688099087393	4.94207195159993	16.2488	3.31912498093729e-06	3.5844925250624e-05	4.98012616837156
TFDP2	-0.825749	12.6262958493006	-16.234	3.33705613665105e-06	3.5844925250624e-05	4.97403232826504
GPR137B	0.840941172415171	9.91731561465959	16.2165018349918	3.35835684012154e-06	3.5844925250624e-05	4.96683542993624
STXBP1	1.1512205258801	10.5627733963816	16.2038404921251	3.37389284433331e-06	3.5844925250624e-05	4.96161475928209
PTTG1	-0.929936	16.4989906854301	-16.1661	3.42069564591139e-06	3.61121540340519e-05	4.94603022467946
FAH	-0.962871	11.7191419636786	-16.1137	3.48698201325307e-06	3.65804150824284e-05	4.92431618628874
MCCC2	-0.856448	10.1933245153632	-16.0268	3.60011671300715e-06	3.71362918691778e-05	4.88818462568523
TMEM255B	1.21401078893414	10.7802918340504	16.0258992166396	3.6013209769235e-06	3.71362918691778e-05	4.88780611364096
MRPL47	-0.911743	15.0125935529486	-16.0201	3.60904396871666e-06	3.71362918691778e-05	4.88538168219048
SDHB	-0.777166	14.5481556109828	-16.0051	3.62902612390647e-06	3.71362918691778e-05	4.87913261788021
MRPL39	-0.733069	13.4989568082452	-15.9445	3.71132088338162e-06	3.77468489846375e-05	4.85375124584864
SNRPF	-0.771287	16.6940870251655	-15.9071	3.76313985067785e-06	3.80419228541252e-05	4.83805420482893
NFE2L3	-1.28117	10.6409395163068	-15.8661	3.82086791428062e-06	3.8324410614342e-05	4.82081779458517
ID3	-2.22048	12.3141389429111	-15.8548	3.83703631450546e-06	3.8324410614342e-05	4.81603655948858
DNM3	0.904029765202292	8.23477780317526	15.8051341569321	3.90870729367991e-06	3.88078795586791e-05	4.79508037099822
PDP1	-0.833861	14.6954651959308	-15.7667	3.96524583550409e-06	3.91362725066321e-05	4.77881617292202
SNN	-0.863763	12.2425727693928	-15.6603	4.12688485374537e-06	4.04920231532192e-05	4.73355743797441
SDPR	-2.12001	7.70082026444654	-15.4677	4.43953720202474e-06	4.3304959374136e-05	4.65080207070432
KCTD11	0.822502441823545	13.5886561741711	15.4416607925826	4.48383457859136e-06	4.3317655369522e-05	4.63954764724304
TLCD1	0.807212544529103	12.276763091403	15.4314805643241	4.50130669172213e-06	4.3317655369522e-05	4.63513892160098
COQ3	-1.42428	9.77649958380073	-15.4214	4.5187482220005e-06	4.3317655369522e-05	4.6307548272093
COA1	-0.792488	13.4047380755034	-15.3489	4.64605742164626e-06	4.42835644531769e-05	4.59925436500004
RBCK1	0.780630412128877	13.1506359464704	15.3171026426358	4.70315067622588e-06	4.45730416360498e-05	4.58540503522436
CLPB	-0.969684	11.2974882987927	-15.1664	4.98546350399386e-06	4.6887409987977e-05	4.51928833018184
SLC48A1	-0.963305	14.2667032444569	-15.1419	5.03308293837645e-06	4.6887409987977e-05	4.50850376205311
APOBEC3C	-0.975524	12.3788351020057	-15.1371	5.04252315936042e-06	4.6887409987977e-05	4.50637783769083
AGPAT9	-1.73876	13.0342738381733	-15.1283	5.05979244474572e-06	4.6887409987977e-05	4.50249902932423
CCNF	-0.911738	8.85954703231044	-15.0969	5.12205817530948e-06	4.72021714719127e-05	4.4886220433941
MED30	-0.910734	12.1483076972435	-15.0462	5.22456924155684e-06	4.78823159061363e-05	4.46613666635989
ZNF425	1.52974289174602	9.11309105653259	15.0131719165451	5.29271854257607e-06	4.81629290517905e-05	4.45142963036082
BIRC5	-0.944448	16.103446458471	-15.0035	5.31293701770351e-06	4.81629290517905e-05	4.44710253002706
HSD3B7	1.33259241673324	9.58449391667525	14.9824230575548	5.35701605399629e-06	4.8300015016572e-05	4.43772529240503
PLAT	-1.48568	8.98545474123777	-14.9529	5.41960503826684e-06	4.85042371226383e-05	4.42454116353741
CITED4	-1.09521	15.644014251229	-14.9444	5.43782514504398e-06	4.85042371226383e-05	4.4207315856125
CDKN1A	0.952669004420434	9.26503433811578	14.926024053979	5.47732386938472e-06	4.85966819900729e-05	4.41251629537688
PLEKHA7	-1.36982	8.65031662894598	-14.8839	5.56914847585665e-06	4.86930757297846e-05	4.3936430401514
SCAI	-0.993329	9.98604689491299	-14.8754	5.58798213658912e-06	4.86930757297846e-05	4.38981027561704
KNSTRN	-0.994119	14.5877613575347	-14.8695	5.60107630897752e-06	4.86930757297846e-05	4.38715308792241
MSC	1.81754086617594	7.08707887493706	14.8677428449422	5.60495835738527e-06	4.86930757297846e-05	4.3863664936549
NUP155	-0.817825	12.329354316939	-14.8356	5.67684808725209e-06	4.88904815609885e-05	4.37189695602569
UCHL5	-0.734281	13.3367596472108	-14.8314	5.68630301129003e-06	4.88904815609885e-05	4.37000748586632
OIP5	-0.743018	13.6492720555882	-14.7454	5.88439759041041e-06	5.01130329691046e-05	4.3311221551268
SNTB2	-0.740959	10.0217361622817	-14.7324	5.91486785397273e-06	5.01130329691046e-05	4.32525663003657
MIS18A	-0.831038	13.1800945945504	-14.7308	5.91862559647099e-06	5.01130329691046e-05	4.32453534539034
SNAI3-AS1	3.71215795706092	7.26693917439175	14.6982178817283	5.99632734237156e-06	5.04484918680176e-05	4.30972190601017
PCK2	1.26337953557426	11.5322714923431	14.6883087781057	6.02016908168505e-06	5.04484918680176e-05	4.30521482769404
MRPL16	-0.784067	13.9708695732916	-14.6764	6.04897984028987e-06	5.04484918680176e-05	4.29979200759478
PANK1	1.42447709818907	10.1902692093185	14.6513851796382	6.10998402135857e-06	5.05883677912078e-05	4.2883938924105
NUP50	-0.712788	11.0017251161856	-14.6447	6.12640904905514e-06	5.05883677912078e-05	4.28534433733243
MYBBP1A	-0.973235	11.4019673246485	-14.625	6.17513743429948e-06	5.07395529084312e-05	4.27634475446528
SNHG9	-1.05141	13.8924205932632	-14.5803	6.28725109332777e-06	5.14075236454447e-05	4.25590378567807
CENPH	-0.749658	12.7186915241895	-14.5471	6.37217151004893e-06	5.18477174573738e-05	4.2406604827521
ZBED3	0.748409696789213	7.35554599499402	14.4837999504473	6.5377082211151e-06	5.29363947224271e-05	4.21151831522957
MAD2L1	-0.728961	13.4322878387724	-14.4473	6.63536245234662e-06	5.32542863549835e-05	4.19466866386893
HJURP	-0.788959	14.7434252823449	-14.4389	6.65806687146543e-06	5.32542863549835e-05	4.19078647701266
GS1-259H13.2	-1.26688	10.3077464137748	-14.4335	6.67274930946735e-06	5.32542863549835e-05	4.18828295424578
LTBP3	-0.919	11.9373746515261	-14.4086	6.74096087789822e-06	5.35424892587344e-05	4.17672346089469
ZNF395	-0.866448	14.0444172443476	-14.3718	6.84311165068135e-06	5.40962570300307e-05	4.15962810037292
TCF4	-0.708052	10.4286094066787	-14.3531	6.89545892050895e-06	5.42529503745704e-05	4.15096562440006
DLGAP5	-0.995944	14.0169483353468	-14.3017	7.04254730908188e-06	5.46427581541836e-05	4.12697078311406
ELFN2	-0.757303	10.936200105716	-14.2946	7.06313646710188e-06	5.46427581541836e-05	4.12365184458421
TIPRL	-0.87381	15.0666768724645	-14.2934	7.06639776691787e-06	5.46427581541836e-05	4.12312701100798
SLCO4A1	-1.36589	11.8293	-14.2823	7.09875847322008e-06	5.46427581541836e-05	4.1179322874352
CDKN3	-1.02153	15.4457111420971	-14.2726	7.12739704334622e-06	5.46427581541836e-05	4.11335466206921
BLMH	-0.92937	10.6768174478076	-14.2677	7.14155951895206e-06	5.46427581541836e-05	4.11109766738398
PTGES	-2.05725	9.24512171190732	-14.2262	7.26507726462023e-06	5.52661195388798e-05	4.0915999047037
MND1	-0.943363	12.4775585858062	-14.2136	7.30277805367279e-06	5.52661195388798e-05	4.08571430094342
SMG5	0.660388461848717	12.6365464857607	14.2070399221627	7.32267503235239e-06	5.52661195388798e-05	4.08262028095924
CSTF3	-0.797861	10.1504311129542	-14.1962	7.35556267244084e-06	5.52661195388798e-05	4.07752446784504
TMC4	1.25158544885998	11.2135761621063	14.1494268637361	7.49955364151812e-06	5.609531602714e-05	4.05547712572044
PFKM	-0.79181	13.990951256546	-14.0819	7.71325784070666e-06	5.70565101678769e-05	4.02351955671394
TRAP1	-0.72557	12.8611457384219	-14.0767	7.72986997024943e-06	5.70565101678769e-05	4.02107236182382
MCM3AP	-0.792999	11.5863126538772	-14.0749	7.73581770764478e-06	5.70565101678769e-05	4.02019744967196
CDCA2	-0.72079	13.4103149948371	-14.0659	7.7648847770432e-06	5.70565101678769e-05	4.01593128404657
AHRR	-1.5241	8.09432882944462	-14.0367	7.86032863316671e-06	5.72526481287134e-05	4.00203387018274
POLM	0.876051633291107	13.5388344917653	14.0317486555662	7.87649356069032e-06	5.72526481287134e-05	3.99969675246684
NTHL1	-0.700282	12.8186422991429	-14.0263	7.89454980192091e-06	5.72526481287134e-05	3.99709182264886
DDX31	-0.866761	11.8604014580559	-13.9846	8.03353656368188e-06	5.80083938884042e-05	3.97723666501213
ARRB2	-0.922602	12.4059233055448	-13.9654	8.098808625123e-06	5.81611005484391e-05	3.96802973097446
PTGR2	-1.12089	10.2766210123363	-13.9559	8.13123421613411e-06	5.81611005484391e-05	3.96348334871448
TFB1M	-0.766092	12.6503792344395	-13.9477	8.15929108413354e-06	5.81611005484391e-05	3.95956403123857
IL7R	-1.22833	9.34481142622166	-13.9279	8.22745132759808e-06	5.82744501977629e-05	3.9500981561654
ACAT1	-0.696192	13.4074826128067	-13.9228	8.24506609512713e-06	5.82744501977629e-05	3.94766455646812
CACYBP	-0.985841	15.0146516074624	-13.88	8.39561953266888e-06	5.90881577235936e-05	3.92707310337935
SMC4	-0.738955	13.9488274903167	-13.8543	8.48721555287456e-06	5.94818300092217e-05	3.91472430126067
SLC16A5	-1.07089	15.0134719631586	-13.8381	8.54589923032629e-06	5.96425101095575e-05	3.90688215711249
PIF1	-1.38153	12.5331670228248	-13.8191	8.61483167266472e-06	5.98730801250198e-05	3.89773855633764
CMTM1	-1.22079	9.9023438480302	-13.7442	8.89381918071757e-06	6.1194019741152e-05	3.86146071333179
FEM1B	-0.709733	10.8639021609001	-13.7338	8.9336358647494e-06	6.1194019741152e-05	3.85637572113429
MCCC1	-0.754835	13.8952364550711	-13.7301	8.94751286499055e-06	6.1194019741152e-05	3.85460878488511
UBOX5	-0.964818	9.32116012735257	-13.7244	8.96929554368513e-06	6.1194019741152e-05	3.85184072204079
ABCG1	-3.83497	6.62011589070126	-13.7132	9.01245620092398e-06	6.1194019741152e-05	3.84637572276606
TP53I11	-1.50372	7.84696146092758	-13.71	9.02501729995407e-06	6.1194019741152e-05	3.84479012810097
LGALS2	-0.978885	9.21892954151201	-13.6822	9.13303861899467e-06	6.14345137426611e-05	3.8312444643346
C2CD3	-1.12491	7.76628815442881	-13.68	9.14134694212689e-06	6.14345137426611e-05	3.83020922691822
PRMT7	-0.716289	14.1931423938403	-13.6725	9.17097956949797e-06	6.14345137426611e-05	3.8265245368397
LY96	0.86818440134015	10.902724089736	13.6409	9.29618322499422e-06	6.20241344771614e-05	3.81108564675745
LGALS9C	-2.33541	13.3683876909487	-13.6216	9.37349696849131e-06	6.22908085396155e-05	3.8016550530658
SERPINB2	-1.25755	12.4568455620936	-13.5746	9.56539728491144e-06	6.33138201239376e-05	3.77857780650453
ITM2B	0.818742392100201	16.843447567451	13.5625546462243	9.61534850143232e-06	6.33918014342956e-05	3.77264640379493
GTF2E2	-0.768323	12.1204100227552	-13.5535	9.65318798819609e-06	6.33918014342956e-05	3.76817356924843
ME2	-0.772113	11.1394346242668	-13.5377	9.71924120997359e-06	6.35752719146508e-05	3.76040736139465
FKBP4	-1.08054	14.3928930642242	-13.5196	9.79590493883964e-06	6.35939640720026e-05	3.75145920411973
PACS2	1.18945463513541	10.2040034546623	13.5150309962766	9.81515792139145e-06	6.35939640720026e-05	3.74922295162821
RNF182	-1.09976	9.09740939227028	-13.5055	9.85563070531629e-06	6.35939640720026e-05	3.74453619655383
ST3GAL5	-0.952423	10.3395513648029	-13.4894	9.92484663903838e-06	6.35939640720026e-05	3.73656518697885
ECM1	1.1775774983741	9.98387058636252	13.4794057262077	9.96810663927043e-06	6.35939640720026e-05	3.73161134318913
TRIM14	-0.604511	11.9966656619634	-13.4787	9.97114799974995e-06	6.35939640720026e-05	3.73126387238986
ABHD3	1.12577994325919	11.6032583743564	13.473746362155	9.99265769709159e-06	6.35939640720026e-05	3.72880942863448
UVRAG	-0.779326	8.62376833248216	-13.4581	1.00608197906983e-05	6.35939640720026e-05	3.72106612355487
NUDT8	0.672701814331301	13.301405820015	13.4548298624458	1.00752309930852e-05	6.35939640720026e-05	3.71943567837905
LGALS9	-1.20773	7.73400832382355	-13.4484	1.01033576013673e-05	6.35939640720026e-05	3.71626018262359
PACRGL	-0.816033	11.5675468177296	-13.4319	1.01763449108804e-05	6.38125688396558e-05	3.70806076730347
AFAP1L2	0.616458305404654	12.7331806045164	13.4114744286975	1.02674907390747e-05	6.4142975853096e-05	3.69790320463265
ILF3-AS1	-0.833729	12.4239193687093	-13.3941	1.03457407002585e-05	6.43906548060867e-05	3.68925412922507
GRAMD3	0.866938186669946	11.0958830328848	13.3796472285386	1.0411342157313e-05	6.45580621501789e-05	3.68205313100256
C17orf59	1.14928437597596	11.7641092044732	13.3668226331344	1.04699667772877e-05	6.46811280907995e-05	3.67565607739962
KLHL11	-0.713802	9.25709060171349	-13.3341	1.06215036328897e-05	6.53751588917345e-05	3.65928428836469
ABCG2	-1.2675	8.94064585208457	-13.3252	1.06627954047824e-05	6.53880247616804e-05	3.65486348891385
MYO7B	-2.39595	5.55106704601933	-13.3059	1.07536971269735e-05	6.54797656944946e-05	3.64519106796173
NDC80	-0.763971	14.8534889963816	-13.3054	1.07562684654026e-05	6.54797656944946e-05	3.64491864902419
GNE	0.793271593748464	12.4158460599446	13.2915591511299	1.08218421933932e-05	6.56393919221087e-05	3.63799329425982
GPCPD1	1.40708341263904	10.2814032645175	13.2557629673551	1.09940050169473e-05	6.60554865393409e-05	3.62000778181293
SCARB1	0.654025323308169	13.6956722500373	13.2503644678977	1.10202442727698e-05	6.60554865393409e-05	3.61729126260838
ARHGAP5-AS1	-0.733654	10.3423340232127	-13.2389	1.10763239640707e-05	6.60554865393409e-05	3.61150691751329
MRPL19	-1.12011	8.65854496164708	-13.2364	1.10882370785228e-05	6.60554865393409e-05	3.61028189264499
LGALSL	0.802714061992605	10.2860640721832	13.2345856259944	1.10973547081185e-05	6.60554865393409e-05	3.60934521199855
STMN3	-1.00017	8.93778431145793	-13.2283	1.11280525884621e-05	6.60554865393409e-05	3.60619715098629
NUP88	-0.784391	13.3084045878778	-13.2093	1.12221921997386e-05	6.63780730112196e-05	3.59659677751954
SBF2-AS1	0.649209930284391	10.0288178419838	13.1895530539205	1.13208953278748e-05	6.67250679340846e-05	3.58661672244935
ZBTB24	-1.60039	9.46306934516806	-13.1816	1.13608628856595e-05	6.67250679340846e-05	3.58260014415819
NDUFAF7	-0.702178	12.7318430008007	-13.158	1.14806225943015e-05	6.71918543413858e-05	3.57064845814597
P2RX4	0.770187698104133	12.4142532769865	13.143749963705	1.15536414965251e-05	6.7202185008592e-05	3.56342212674477
KDM4A-AS1	-0.859241	8.12750784157324	-13.1419	1.15629658857709e-05	6.7202185008592e-05	3.56250261171093
PHLPP1	-1.31204	7.89335086429405	-13.1057	1.1750992255059e-05	6.80578301438831e-05	3.54411643982352
CHST14	-0.686764	6.8019548254935	-13.0135	1.22463845343994e-05	7.06815550289902e-05	3.4970423275264
GPR161	-0.921193	10.5253088237442	-12.999	1.23264495312568e-05	7.08510512507924e-05	3.48961265138119
NLRC5	-1.59845	6.72760043871039	-12.9928	1.23607049844008e-05	7.08510512507924e-05	3.48644856225643
LRRCC1	-0.709224	11.0686547592408	-12.9528	1.25860372640215e-05	7.18955827273555e-05	3.46585028660991
TMEM171	-0.837459	8.72050675138394	-12.9345	1.26901179139065e-05	7.22427190457204e-05	3.45645963576444
GRIN2D	0.934597749248928	9.21726997282438	12.8698690797153	1.30670918214766e-05	7.3853851498781e-05	3.42307760837479
DANCR	-0.86014	10.3772223727424	-12.8696	1.30684008640466e-05	7.3853851498781e-05	3.42296336803505
HIST1H2BF	-0.768031	12.319134730132	-12.8633	1.31059592587765e-05	7.3853851498781e-05	3.41969048574585
RNF144B	0.784706119489126	10.4889	12.8411002876983	1.32390353063399e-05	7.42958795014154e-05	3.40816878694529
TRIM36	0.742272297151578	9.98974201258953	12.8262940642312	1.33285510331856e-05	7.42958795014154e-05	3.40048323033758
SECTM1	-1.26856	13.9633170670445	-12.8208	1.33621445305706e-05	7.42958795014154e-05	3.39761224860555
EPS15L1	-0.827117	10.3233637814754	-12.8207	1.33625682556503e-05	7.42958795014154e-05	3.39757608195311
PKP2	-0.681064	13.0556991914942	-12.8077	1.34418679029151e-05	7.43546922708253e-05	3.39082756356723
RPRD1A	-0.802445	10.7237681681292	-12.8044	1.34623003991542e-05	7.43546922708253e-05	3.38909515122385
C12orf5	1.0417199419376	8.74595747905723	12.7733604690258	1.36543735717031e-05	7.49349907484763e-05	3.37293665121576
SLC25A1	1.02207635647859	13.3606431289816	12.7729050688054	1.36572165392907e-05	7.49349907484763e-05	3.37269918526321
MAP3K3	0.766325493018405	12.5972920996507	12.7649423281199	1.37070374466367e-05	7.49617654458691e-05	3.36854574108123
CTC-338M12.4	-0.819457	12.8455841585207	-12.7019	1.41090155123668e-05	7.68127097657191e-05	3.33557368951331
IFIT3	-0.877182	10.5583111874387	-12.6939	1.41611335438832e-05	7.68127097657191e-05	3.33136741005919
DEPDC1B	-0.947606	9.67252026370939	-12.6902	1.41849587562083e-05	7.68127097657191e-05	3.32944968594779
SPC24	-0.924303	9.55651399578022	-12.6834	1.42296926364552e-05	7.68127097657191e-05	3.32585764499539
AP1S1	-0.702302	13.6586550204193	-12.6392	1.45227513050403e-05	7.81417715380876e-05	3.30260019586644
HOXA3	-0.96545	11.4356552080549	-12.6273	1.46026155356854e-05	7.82070710191472e-05	3.29634311610332
TIMP3	-1.40123	7.47211263271388	-12.6193	1.46568451830403e-05	7.82070710191472e-05	3.29211381516946
DRAP1	-0.95581	17.1401635397705	-12.6097	1.47220320271748e-05	7.82070710191472e-05	3.28705055651062
GABPB1	-0.711211	10.7995437220455	-12.6096	1.47224342326212e-05	7.82070710191472e-05	3.28701938536689
SPOCD1	-1.01461	11.0998458616511	-12.6017	1.4776322511026e-05	7.82441458679089e-05	3.28285066547241
OPA1	-0.723777	11.4005346904868	-12.584	1.48983157322062e-05	7.86404767130376e-05	3.27346911729187
KLHL24	1.16749281256007	9.62233481748885	12.4781096674824	1.56507062194315e-05	8.23513500757466e-05	3.21724738324056
IFI30	-0.792276	12.5641424645247	-12.4606	1.57796629818641e-05	8.25973228196987e-05	3.20788221789909
GAS2L3	-0.879981	11.1568465373314	-12.4537	1.5830149629046e-05	8.25973228196987e-05	3.2042365026293
TBC1D8	-0.844972	10.8813060762045	-12.4516	1.58460091740429e-05	8.25973228196987e-05	3.2030936520142
COX11	-0.626424	10.2221089858742	-12.4131	1.61347116378321e-05	8.32900641954681e-05	3.18248636346645
TMPO	-0.669851	9.43130968832943	-12.4105	1.61542538316021e-05	8.32900641954681e-05	3.18110476529726
TMEM45A	0.670416610530687	12.2918867678223	12.3979901938188	1.62495625174205e-05	8.32900641954681e-05	3.17439038659152
HRK	-1.34465	7.39949923508444	-12.3957	1.62667777100945e-05	8.32900641954681e-05	3.17318178225561
APOBEC3F	-1.01091	11.9737603584489	-12.3914	1.63002473852473e-05	8.32900641954681e-05	3.17083566369349
HIST1H4K	-0.96427	14.1592519171998	-12.3901	1.63098329915249e-05	8.32900641954681e-05	3.17016462701719
TBC1D1	-0.603083	10.4673541173598	-12.3877	1.63284478368813e-05	8.32900641954681e-05	3.16886262359213
CNOT6	-0.745483	11.3731657343416	-12.3811	1.63792441079613e-05	8.32944486953639e-05	3.16531722044422
CAMKK1	-1.41652	11.2241255088444	-12.3729	1.64428959416091e-05	8.33639830717446e-05	3.16088997570593
CUTC	-1.01002	11.0942538763044	-12.3439	1.66687597699965e-05	8.42530039283461e-05	3.14531685977866
FBXO36	-1.26932	9.42288953098195	-12.3101	1.69376642884151e-05	8.493031641077e-05	3.12704799195228
HBEGF	1.78441394290024	10.1643317935104	12.3091001640475	1.69453360381327e-05	8.493031641077e-05	3.12653103766074
PRC1	-1.10322	14.9762972265784	-12.3078	1.69555128086249e-05	8.493031641077e-05	3.12584564441317
REPIN1	-0.948625	10.624478042017	-12.2923	1.70808651840635e-05	8.52088113672426e-05	3.11743677021475
PTPRS	-1.49249	7.96769823252539	-12.2883	1.71132804604474e-05	8.52088113672426e-05	3.11527229794142
PMAIP1	-0.736448	12.7983344046033	-12.2633	1.73174025019906e-05	8.56726137441146e-05	3.10173556015086
SUCLA2	-0.80928	11.8373998732168	-12.249	1.74352235645514e-05	8.56726137441146e-05	3.09399422052211
SYTL2	-1.44718	7.46614888683116	-12.2474	1.74483524118256e-05	8.56726137441146e-05	3.09313482992232
TMEM64	-1.09949	7.54774804123905	-12.2428	1.7487091249022e-05	8.56726137441146e-05	3.09060280619441
SPP1	-1.6171	7.62029212665551	-12.2325	1.7572736163461e-05	8.56726137441146e-05	3.08502471740291
TCF7	-1.47232	8.55061886406202	-12.2312	1.75837201189059e-05	8.56726137441146e-05	3.08431128853281
LRR1	-0.732179	9.87492262480994	-12.2294	1.7598622602881e-05	8.56726137441146e-05	3.08334405340276
NEK8	1.0817867004992	7.24454202873993	12.2271793433256	1.76173300445032e-05	8.56726137441146e-05	3.08213101488104
RASGRF1	-1.28884	7.91079610999608	-12.2122	1.77432547151183e-05	8.5866509693532e-05	3.07399898263289
HIP1	-0.827466	9.80927186315188	-12.2102	1.77601593790579e-05	8.5866509693532e-05	3.07291168483742
ATL2	-0.726332	13.4596150746824	-12.199	1.7855949348548e-05	8.60801257612085e-05	3.06676994386472
SLC26A6	1.09556546456946	11.2164751456248	12.1842421836988	1.7981867318539e-05	8.63337384267234e-05	3.05874625130739
BTG1	0.636414235268077	12.3109102185724	12.1798090451582	1.80200007256724e-05	8.63337384267234e-05	3.05632737313268
COA4	-0.829623	12.5291257886039	-12.1747	1.80638337595482e-05	8.63337384267234e-05	3.05355324981666
CKAP2	-0.650067	13.7619851129481	-12.165	1.81484448424825e-05	8.64903028493164e-05	3.04821726907456
AIM2	-0.80326	12.0883118568052	-12.1485	1.82923394498129e-05	8.67627956748237e-05	3.03919926176988
CALML4	-0.792856	10.9367209927453	-12.1465	1.83096547227446e-05	8.67627956748237e-05	3.03811886622569
PLK1	-1.12521	9.77488963827864	-12.1372	1.83915085838122e-05	8.69037856028294e-05	3.03302529641567
CENPF	-0.806055	11.2075685940268	-12.1098	1.86350226324677e-05	8.78056998614582e-05	3.01800451308425
SNHG3	-0.928597	15.8257326682273	-12.0882	1.88298133856696e-05	8.84736020487236e-05	3.00612930634717
TMEM131	0.578588311399871	10.3125036206375	12.0688630122954	1.90056077054663e-05	8.90487462154994e-05	2.99551683258633
ANKRD16	-0.810903	11.6039087727393	-12.0505	1.91742621438834e-05	8.9587308840329e-05	2.98542693791967
TMCO6	-0.818012	11.4456465890621	-12.0235	1.9426574448913e-05	9.04120334821512e-05	2.97049609720053
CCNB1	-0.682277	12.6577232587952	-12.0142	1.95143378047062e-05	9.04120334821512e-05	2.96534787988687
HSF2BP	2.4265740510494	5.47447245454767	12.0140798521455	1.9515267836618e-05	9.04120334821512e-05	2.96529344767357
YWHAE	-0.605935	11.9208950333228	-12.0061	1.95909320736647e-05	9.04120334821512e-05	2.96087366722524
CETN3	-0.799846	13.3515375466664	-12.0028	1.9621796235335e-05	9.04120334821512e-05	2.95907568032287
MCM3AP-AS1	1.26791024955056	10.0467606835007	11.9751437332086	1.98871454300375e-05	9.13192243133163e-05	2.94373309277375
LAMA2	-1.16158	7.27561518226573	-11.9709	1.99281760491889e-05	9.13192243133163e-05	2.94137891802602
KIF20B	-0.674953	10.8507370003504	-11.9594	2.00395480693826e-05	9.15779895335071e-05	2.93501310477197
LINC00342	1.54512200153501	10.2262898939052	11.9536863257685	2.00955948941434e-05	9.15832029601943e-05	2.93182290067994
NUF2	-0.832387	12.2501939843531	-11.8952	2.06767022379283e-05	9.39747665745625e-05	2.89925914818649
TRPV2	-1.32071	8.01988590325787	-11.8769	2.08628221672529e-05	9.45630091711355e-05	2.88902211651424
BOP1	-0.747662	13.4751238809601	-11.8523	2.11152677615582e-05	9.52468438455788e-05	2.87528155453775
GUCA1B	-0.932303	7.59791952300468	-11.8511	2.11278970161056e-05	9.52468438455788e-05	2.87459845496865
SGSH	-0.711748	11.2357626712887	-11.8014	2.16504733654067e-05	9.73395945377316e-05	2.84668415570368
GLS	0.678338172270406	9.5175529828941	11.7765619937211	2.19165720506088e-05	9.80525789988992e-05	2.83272708979109
KLF11	0.886859637461306	10.0857132041803	11.7756320049327	2.19266258792502e-05	9.80525789988992e-05	2.83220307714659
ATP9A	0.597065558222338	13.5564352336396	11.7553265910383	2.21474805622904e-05	9.87753945933167e-05	2.82075200528352
L3MBTL3	-1.06656	7.50359329328482	-11.7435	2.22768126916521e-05	9.90872628524685e-05	2.81409901433683
HSPA14	-0.732639	12.7382760388645	-11.73	2.24263777983209e-05	9.94872291691468e-05	2.80645306606118
HMGB2	-0.876452	14.5733	-11.7238	2.24952483779738e-05	9.95280485264198e-05	2.80294939826255
SLC1A5	0.864179467123481	12.0229375009777	11.6969204619775	2.27972682956058e-05	0.00010059746962188	2.78770990654429
CD14	-1.00915	9.29241815224258	-11.6768	2.30258717418421e-05	0.000100996752216564	2.77630815923455
NDRG1	1.74624840517157	15.2039649135783	11.6731917019422	2.30675552829079e-05	0.000100996752216564	2.77424
SNRNP70	-0.785143	12.4469570401231	-11.6709	2.30934516666862e-05	0.000100996752216564	2.77295917423347
ABL2	0.622998624302173	10.4117067893484	11.6621030552983	2.3195135487369e-05	0.000100996752216564	2.76793850749143
IL1B	-1.01276	16.9053594831238	-11.6599	2.3220798704255e-05	0.000100996752216564	2.76667484733242
CDK18	-1.04062	8.17518162085966	-11.6548	2.32797531742226e-05	0.000100996752216564	2.76377718738544
MAPKAPK5-AS1	-0.669843	14.1691049504352	-11.652	2.3311600481641e-05	0.000100996752216564	2.76221490880933
FHAD1	-1.41748	6.60256914055993	-11.6427	2.34201464123176e-05	0.000101089153415884	2.7569060995835
SMAD6	-1.51388	7.69675934469971	-11.6328	2.35360174580134e-05	0.000101089153415884	2.75126603565508
GPD1L	-0.72503	9.9929753285177	-11.6313	2.35542295811257e-05	0.000101089153415884	2.75038207275739
SLC1A3	-0.70163	9.89439100766204	-11.6295	2.35753481287644e-05	0.000101089153415884	2.74935789349096
P2RY6	-2.57719	7.60666079569829	-11.5947	2.39889872692828e-05	0.000102541542246577	2.72948010876965
FADS3	1.05922239195987	10.2857280485349	11.5906602843058	2.40370161980885e-05	0.000102541542246577	2.72719421812276
LAMC1	-0.809527	12.7399705666387	-11.5841	2.41161383167856e-05	0.000102616629368363	2.72343839038945
MNAT1	-0.735302	13.3597361042033	-11.5374	2.46874637939176e-05	0.000104780380682581	2.69667753551704
IQCE	-0.8188	8.90528813142361	-11.528	2.48046895631408e-05	0.000104867339907249	2.69126310171326
ATF3	2.12250699567368	9.56329600049873	11.5225666501478	2.48725747187426e-05	0.000104867339907249	2.68813927162445
CBX3P2	-1.07554	8.27365080067252	-11.5176	2.49351604621804e-05	0.000104867339907249	2.68527
SNORA75	-1.20672	8.87959184806638	-11.5145	2.49741335549033e-05	0.000104867339907249	2.68348173905903
SNCA	1.24255646251593	9.61539410414562	11.5106449234556	2.5022302927509e-05	0.000104867339907249	2.68127927043247
STK39	-1.29303	11.9413854410498	-11.5031	2.51178958516679e-05	0.000105004136041559	2.67692092846649
ANXA11	-0.750847	9.51387535681048	-11.4951	2.52193760752313e-05	0.000105058165458219	2.67231223229943
CNNM4	0.60922719420812	11.3267990388603	11.4921397667039	2.52567891779052e-05	0.000105058165458219	2.67061779121339
SSH1	-1.13946	9.9104524718302	-11.4655	2.55982524497865e-05	0.000106213644493144	2.65526758067903
ACY3	2.80946615589622	6.6495165968966	11.4598950017484	2.56714903250172e-05	0.000106253215538781	2.65200183553409
KLHL29	0.68245803914245	11.3220751166646	11.4498966518128	2.58016791092226e-05	0.000106527724639068	2.64621946911877
ZNF70	1.09051015264385	7.95268244377596	11.4422565567968	2.5901677046333e-05	0.000106676536576008	2.6417977610299
MRPL2	-0.731615	9.76549310656341	-11.4311	2.60491527010023e-05	0.000107012185631071	2.63530765534856
CNN3	-0.760465	12.0819366874171	-11.4263	2.6111486541874e-05	0.000107012185631071	2.63257547972728
B4GALT4	-0.842113	11.601056971747	-11.4108	2.63176587978737e-05	0.000107592781556013	2.62358479001965
MMP28	-0.791693	11.4754468575882	-11.3982	2.64865209336805e-05	0.000107872479674373	2.61627328208846
SLAIN2	-1.00225	6.15493206897175	-11.3905	2.65906780087793e-05	0.000107872479674373	2.61178656465269
ARHGAP26	1.30497867741573	8.02567579961109	11.3849579329817	2.66661233403424e-05	0.000107872479674373	2.60854758064113
NUBP1	-0.704334	10.1952462269468	-11.3832	2.66895371414047e-05	0.000107872479674373	2.60754424838144
CORO1A	-0.79439	10.1399926248357	-11.3818	2.6709432916976e-05	0.000107872479674373	2.60669236086084
MPHOSPH9	-0.703713	9.68359010802979	-11.3477	2.71766082838496e-05	0.000109311835568188	2.58686892334039
MRPL38	-0.619168	11.7838287105919	-11.3463	2.71968895448429e-05	0.000109311835568188	2.58601605447143
KLHL23	-0.866991	6.62372100369919	-11.3396	2.7289955980102e-05	0.000109422227343294	2.58211053584046
PAAF1	-0.655013	13.8223427894031	-11.3276	2.74579410936356e-05	0.000109831764374542	2.57509457915186
HAGHL	-0.68854	10.4570359713732	-11.3042	2.77887487026041e-05	0.000110549240127245	2.56140258846806
POP1	-0.843159	12.742390213454	-11.3019	2.78205092257433e-05	0.000110549240127245	2.56009659811389
PLA2G12A	-0.575365	12.2120235681818	-11.3007	2.78379283073533e-05	0.000110549240127245	2.55938095812767
SLC6A9	1.1297187148665	8.18434868664647	11.2956175218931	2.79108626568382e-05	0.000110549240127245	2.55638938915975
TUFT1	0.770831046472084	13.408437819797	11.2874405092583	2.80281166200083e-05	0.000110549240127245	2.55159625649538
KREMEN2	-1.15019	14.1518564243166	-11.287	2.80349691689595e-05	0.000110549240127245	2.55131675548462
CDKN2AIPNL	-0.640702	11.1625671539032	-11.2817	2.81107823816752e-05	0.000110586757105269	2.54822903417259
HYAL3	1.08814453537344	8.64654045074665	11.2393054422081	2.87300337507247e-05	0.000112756932461668	2.52331483828213
ITGAV	0.713692624264736	12.3327365973648	11.2210183447359	2.90020263007302e-05	0.000113281074270147	2.51254069282055
PTPRE	0.697600024572242	8.92308877749119	11.2204376746913	2.90107116443495e-05	0.000113281074270147	2.51219831277139
SEMA3C	0.836243462139844	10.2096235029629	11.2166575775078	2.90673260117643e-05	0.000113281074270147	2.50996905211618
LYAR	-1.02842	11.8657975760933	-11.2019	2.92890534208038e-05	0.000113838244132846	2.50127976526842
THUMPD3	-0.767256	11.9116917034532	-11.1981	2.93467895546305e-05	0.000113838244132846	2.49902790896354
HNRNPH3	-0.775459	13.4617927700083	-11.1493	3.00977310961001e-05	0.000115982442867402	2.47013524986196
CDKL1	-0.633117	10.5094421236992	-11.1474	3.01272058120984e-05	0.000115982442867402	2.46901592308754
ANKLE2	0.545003078346186	10.9576425715315	11.1454293825394	3.01584256884706e-05	0.000115982442867402	2.46783151323642
FLVCR1-AS1	0.639092209338612	11.2207232590382	11.1441990018526	3.01776859738924e-05	0.000115982442867402	2.46710143252611
ID2	-2.13212	8.78851542937277	-11.1347	3.03276268863817e-05	0.000116064049867929	2.46143361542887
OASL	-1.46981	11.1780354802411	-11.134	3.03380849774683e-05	0.000116064049867929	2.46103933963782
C15orf41	-0.700462	10.4440456515314	-11.1245	3.04883251639907e-05	0.000116319947707817	2.45539011992232
ARPC1B	0.547090654127679	14.7944087680712	11.120941864505	3.05444467002541e-05	0.000116319947707817	2.45328700187412
LGMN	0.572463144519528	11.5538254829678	11.1157303548893	3.0627338158508e-05	0.000116369931773101	2.45018774016388
AARS	0.690290243090166	13.3803525049322	11.0885303040059	3.10642217683253e-05	0.00011776164070356	2.43398997687223
HABP4	0.724801341756523	12.5494059237252	11.0798376689963	3.12053615398785e-05	0.000117992270522758	2.42880566331348
MEF2C	-1.67497	5.12510015683975	-11.0761	3.12665369131049e-05	0.000117992270522758	2.42656584738025
USP46	-0.841067	6.38401435000656	-11.0633	3.14766425837131e-05	0.000118517019931452	2.41890640079765
KCTD7	1.17540970848161	4.88834129750367	11.0566378736607	3.15857030388267e-05	0.000118659803308025	2.41495066658939
CENPE	-0.973594	12.2126811488481	-11.0497	3.17007074501374e-05	0.000118824224779391	2.41079407406263
CCNH	-0.744632	13.8946701026698	-11.0405	3.18535769199529e-05	0.000119129520857582	2.40529216003361
QPCTL	0.959299750484661	8.55028851431574	11.0093179984522	3.2378252050057e-05	0.000120820859998871	2.38660698958612
INTS8	-0.695865	11.1515492810157	-11.0038	3.24725869680192e-05	0.000120902399693429	2.38327952387984
DHRS12	0.796564998628307	10.4692798145817	10.9924194267613	3.26668491966181e-05	0.000121354798351802	2.37645760945755
FAM213A	-0.677721	12.8899473088208	-10.9849	3.27966988083561e-05	0.00012156643024964	2.37192021038995
TPBG	0.72396940446221	12.9744795971841	10.9704058983295	3.30472828780192e-05	0.000122074665455649	2.36321438021631
RDM1	-0.948057	8.93187516270834	-10.9685	3.30801851234732e-05	0.000122074665455649	2.36207618063805
HERPUD1	0.741876653939283	15.497682395231	10.9581416735565	3.32614567994749e-05	0.000122472648877537	2.35582556839487
VIMP	0.582824654902534	11.9642752580041	10.9518711607949	3.33715818452011e-05	0.000122607485722017	2.35204481209272
ACTA2	-0.810023	8.72520849998838	-10.9427	3.35330958588775e-05	0.000122930118445292	2.34652225610141
TUBGCP4	-0.90678	9.43651918394474	-10.9215	3.39111386364278e-05	0.000123872345917547	2.33369914012234
NETO2	-1.09949	14.5822521786008	-10.9187	3.39618902279421e-05	0.000123872345917547	2.33198852932048
TACC3	-0.901388	11.9109550108858	-10.9158	3.4012910329878e-05	0.000123872345917547	2.33027143752375
LPAR6	-0.908548	10.0141044273683	-10.9062	3.4186506428125e-05	0.000124233317477369	2.32444821657382
RAB3A	-0.967164	8.73847094070765	-10.8781	3.47002190736255e-05	0.000125709886459117	2.30738720511628
EREG	-0.916879	12.3325333352783	-10.8757	3.47435597467942e-05	0.000125709886459117	2.30595935844986
APIP	-0.781151	11.8036567161867	-10.87	3.48481688853256e-05	0.000125815466884682	2.30252034860424
NSMCE4A	-0.657107	12.7724470843073	-10.8629	3.49804032655115e-05	0.00012602011370815	2.29818787595437
SLC7A8	0.639816274216818	10.4756471033223	10.7978574118745	3.62137926762019e-05	0.000130169568339437	2.25854730657081
ZNF684	-0.899587	8.32647489643323	-10.794	3.62882789435481e-05	0.000130169568339437	2.25619668625585
PPP6R1	-1.03746	10.2831271766759	-10.7724	3.67102197950844e-05	0.000131400529223607	2.24297140994301
C6orf57	-0.945075	11.6480515573061	-10.7572	3.70102963615606e-05	0.000132190951458422	2.23365783064125
GBP6	-0.876474	9.74162562350106	-10.7505	3.71434369436297e-05	0.000132383018850372	2.22954961472295
FAM102B	-0.793044	8.80504391171066	-10.6791	3.85979704518703e-05	0.000137273805359743	2.18560191000594
TRAM1	0.561376211512471	13.7303186888431	10.6665243005317	3.88607697945789e-05	0.000137854014631365	2.17783825923825
GRK5	-0.847195	13.4891712574745	-10.6634	3.8926403412094e-05	0.000137854014631365	2.17590748161938
TPM2	-0.949835	12.1668145824017	-10.6262	3.97180442805338e-05	0.000140114498845958	2.15287201226476
PISD	-0.697703	11.1414636485525	-10.6255	3.97327086055984e-05	0.000140114498845958	2.15244964116014
GOLGA3	0.616950174372427	13.0108856051237	10.6090747244711	4.0088665876978e-05	0.000141071507769619	2.14224458956813
DNAJB2	1.33081310213432	14.2002882819969	10.5965437686361	4.03624313947076e-05	0.000141735864350257	2.13445726923692
ADORA2B	-0.875853	14.5797313224051	-10.5921	4.04589379570518e-05	0.000141776278387316	2.13172468297807
SIPA1L2	-0.847657	9.37684432602411	-10.5698	4.09544417788912e-05	0.000143045413764556	2.11779616132771
DHRS3	-0.926187	14.9950031221574	-10.5669	4.10188914841085e-05	0.000143045413764556	2.11599686814668
ABHD5	0.695699723962996	12.0455213815394	10.5642324706476	4.10783892045696e-05	0.000143045413764556	2.11433832703111
UBAC2-AS1	-0.749968	10.6002382481409	-10.5223	4.20302399634362e-05	0.000146055083872941	2.08812602455313
WBSCR27	-0.923941	11.3250312236208	-10.5177	4.21345538537501e-05	0.000146113172199699	2.08528951378575
SAMD8	-0.757065	9.65991793840075	-10.4957	4.26459235335316e-05	0.000147427731388197	2.07148497037281
ACER3	-1.18088	7.42093859648835	-10.4938	4.2690404232913e-05	0.000147427731388197	2.07029202666649
SOCS2-AS1	-0.668932	8.84364629433245	-10.4854	4.28869508500515e-05	0.000147800483508029	2.06503558692641
MRPL22	-0.699254	14.4093014685851	-10.4703	4.32444179320203e-05	0.000148639280888763	2.05553684985251
RIPK1	0.745570321547723	11.2240670228791	10.4676173895711	4.33085674532006e-05	0.000148639280888763	2.05384054669202
CAPRIN1	-0.692865	11.1674734567478	-10.4537	4.36409298150169e-05	0.000149472424910571	2.04509187720251
METTL3	-0.71106	13.1538618046051	-10.4411	4.39458332512165e-05	0.00015020829889965	2.03712431120266
AGMAT	-0.689737	10.7324456378443	-10.4371	4.4040850731978e-05	0.000150225233171655	2.03465264474236
CAB39	-0.697549	12.6660154898821	-10.4015	4.49146322772489e-05	0.000152581683581367	2.01216963383626
ABHD4	0.81542765992608	13.1096151940726	10.3973805848095	4.50180571090221e-05	0.000152622193613514	2.0095373968964
RFC3	-0.64985	11.5509737965196	-10.3764	4.55447748892651e-05	0.000154094694757189	1.99622504100339
NUDT22	-0.689114	12.8310179961748	-10.3555	4.60751460828169e-05	0.00015557357017437	1.98297478407932
CCDC106	-0.79639	10.3201770224093	-10.3375	4.65381783808901e-05	0.000156819558665302	1.97153078988124
COPG2	-0.689016	10.8724371370159	-10.3279	4.67872356388343e-05	0.000157340945656403	1.96542219599608
MMRN2	-0.764987	9.4967361301598	-10.3165	4.70841835739171e-05	0.00015788113296287	1.95818129030914
MTHFR	1.77813086694171	6.25958219327043	10.3119288620971	4.72042753116921e-05	0.00015788113296287	1.95526586418407
STIP1	-0.606623	10.8795978787124	-10.3109	4.72318257484846e-05	0.00015788113296287	1.95459807617802
FUT8	-0.765468	12.8328268572943	-10.3061	4.73585900502355e-05	0.000157988256407585	1.95153047256525
ACYP2	0.573438308593559	11.5086657682823	10.2987504101262	4.75522661130956e-05	0.000158018595265818	1.94685945136051
EGF	-1.26732	4.64907055890167	-10.2986	4.75571551699284e-05	0.000158018595265818	1.94674178455056
ZNF562	0.566070993397974	11.0480416549435	10.272776546412	4.82468666019429e-05	0.000159991597399683	1.93026213687076
PEA15	0.654077022351284	11.1517640841803	10.2676259715232	4.83859964575792e-05	0.000160134607323893	1.92696636149115
PSEN2	0.573176676102193	10.7820787955543	10.2539106477054	4.87587526084167e-05	0.00016104871158582	1.91818276248397
TRIM11	0.578920440996852	11.5343019357255	10.2348354352813	4.92827215096551e-05	0.000162457666952776	1.9059487204595
FABP5	-1.19148	15.1329154458223	-10.2192	4.97170366907188e-05	0.000163566108875974	1.89590604738863
GCC1	0.543682124621707	10.4570478649186	10.2130176248948	4.98900364041393e-05	0.000163812166775796	1.89193015402231
FBXO32	1.49353989372868	13.0882366135647	10.2059629579111	5.0088258754475e-05	0.000164139912774979	1.88739148397788
PANX2	0.781790378813346	9.7583428891964	10.2009301752101	5.02302274009373e-05	0.000164282390793654	1.88415185867732
PHACTR2	-0.634599	9.80008449947858	-10.1786	5.08667211442812e-05	0.000166038533989552	1.86973903563781
ARSA	0.53265590245223	13.2929582819621	10.1344415815559	5.21502077208063e-05	0.000169895598590439	1.84121556113436
RDH11	0.584293062254494	15.1736975558048	10.124160521579	5.24546150497661e-05	0.000170554186945438	1.83455348126649
GRB14	0.900947634599257	4.56419260640762	10.1054682641193	5.30133507400518e-05	0.000172035542868495	1.8224251993218
WNT3	-0.934483	13.1577628134296	-10.1006	5.31602030545335e-05	0.000172177123679538	1.81925871423215
IL21R	2.86867154185812	5.81095312211767	10.0932072448514	5.3383590017127e-05	0.000172565558427457	1.81445867528312
RGCC	1.68097	11.7545958115776	10.0763322156713	5.38980612124464e-05	0.000173891617219266	1.80347982692923
ENDOD1	0.678438990806965	11.061677781349	10.0728773279026	5.40040972486432e-05	0.000173897363341191	1.80123002571806
PCOLCE2	-0.919546	8.73389600971768	-10.0534	5.46051500373558e-05	0.000175494008212542	1.78856010122037
KRT80	1.3449985106389	10.9215133285087	9.97976225530189	5.69549942114587e-05	0.000182343436362213	1.74032864924336
RFFL	-0.800233	12.184472028672	-9.96153	5.75542513363923e-05	0.000183908987028932	1.72834678508091
ARAP3	-0.795874	13.2648411650692	-9.93512	5.84356450302737e-05	0.000186368366941676	1.71094830358068
DNAJC3-AS1	-0.848217	8.59666199182957	-9.91655	5.90646691094135e-05	0.000187624481440722	1.69869111290263
SLC39A14	0.552813447699343	13.8675903723943	9.91114624220163	5.92491918015485e-05	0.000187624481440722	1.69512022802598
ARL3	-0.809676	9.21326692216432	-9.91026	5.92794374815711e-05	0.000187624481440722	1.69453597339015
HSPA1L	-1.05407	8.57725895751246	-9.90583	5.94314020494767e-05	0.000187749201929029	1.69160497974308
NRP2	-1.11219	8.79329072494547	-9.86204	6.09567410296441e-05	0.000191876975381418	1.66259322498371
ZBTB1	0.916083091477576	8.22518900235146	9.86172061919916	6.09681036883404e-05	0.000191876975381418	1.66237984154371
GOLGA8A	0.57662824571366	9.15836702115147	9.85032849935481	6.13724363717072e-05	0.000192785732331464	1.65481248395982
RPS26	-0.694865	18.6775881508733	-9.84233	6.16581626231379e-05	0.000193319201607883	1.64949490345354
NFIL3	0.686233410523663	13.8795145831713	9.83625317677569	6.18762943296186e-05	0.000193639134975242	1.64545185534229
EPS8	0.549831038803301	12.6221276105917	9.83064844091313	6.20782597065583e-05	0.000193907373015991	1.64172112539312
CTH	0.649221916107887	11.8289307909089	9.82394229403797	6.23209172554922e-05	0.00019430147660217	1.63725473050598
PI4K2A	0.634675802236506	12.7171838756735	9.81395492934011	6.26843407340046e-05	0.000195069926015522	1.63059789381397
PECR	-0.709251	10.0085339117578	-9.79908	6.32302813618407e-05	0.000196402438196555	1.62067001514368
DNAJC1	0.681916047909011	11.3081592902457	9.77573826497361	6.40978085950588e-05	0.000197625036481623	1.60506896343981
MPP7	-1.32631	6.59166155915483	-9.76845	6.43714977118641e-05	0.000197993948284382	1.60019087102531
TIPIN	-0.733241	13.6564606592919	-9.76624	6.44548644594842e-05	0.000197993948284382	1.59870910274021
POLR1D	-0.501346	11.1858618451428	-9.73117	6.57931947056772e-05	0.000201733545531378	1.57518013383875
SLC25A23	0.667740363882865	8.3057841654636	9.72637075459521	6.59786303952241e-05	0.00020193092752153	1.57195780216518
NKIRAS1	-0.959701	8.18492111445581	-9.71553	6.6400073153972e-05	0.000202848575129717	1.56466788640791
TNFAIP3	1.01659698740186	10.5901441824325	9.71157157569896	6.65548393550456e-05	0.000202949674669499	1.5620024164611
GEMIN5	-0.869455	11.4700253439608	-9.68636	6.75497246341926e-05	0.000205607556003345	1.54501443567861
LIPA	0.546863687628425	14.9513750351236	9.68040278169276	6.77875501189162e-05	0.00020595561675474	1.54099052474802
FSTL3	0.712146285829313	11.7735044751973	9.64497729162499	6.92208071938002e-05	0.000209927829816834	1.51703514026245
TBC1D10C	-0.720802	6.54071332397617	-9.6372	6.95401367792628e-05	0.000210457446289644	1.51176543529242
RDH5	-0.789295	7.68038964606586	-9.63459	6.96477879807456e-05	0.000210457446289644	1.50999438124554
C7orf55	-0.792715	11.6945194632929	-9.61901	7.02937691966989e-05	0.00021202532915026	1.49942396652839
MICB	1.0251166193374	11.7150257725066	9.57240174766265	7.22679915306064e-05	0.000217586660420671	1.46771070325749
BRICD5	1.06015501818673	9.91074556874197	9.55451157988913	7.3042791670429e-05	0.000219523200912208	1.45550056952118
FAM49A	-0.906704	7.76580430110084	-9.5458	7.34234176719075e-05	0.000220248816922333	1.44954959459905
HRSP12	-0.654124	13.193005709132	-9.54296	7.35483159626734e-05	0.000220248816922333	1.44760356418408
ANKRD36	-0.623837	9.3929090050882	-9.53807	7.37634600738663e-05	0.000220497224736934	1.44425915339325
NHLRC3	0.642773340199858	10.0479664339052	9.51156962407699	7.4942081601815e-05	0.000223619663885201	1.42610878413019
DIS3L	-0.777626	11.7949865026921	-9.49779	7.55636084186153e-05	0.000225071605075447	1.41665205722585
PRIM2	-0.765537	9.33431401689469	-9.48748	7.60325419023192e-05	0.00022606467004112	1.40956840587495
OPTN	0.758812566245224	10.6596303235143	9.48436864942571	7.61747032790545e-05	0.000226084350657407	1.40742955825677
ANKRD10	-0.889198	10.6755513435942	-9.47323	7.66861087362261e-05	0.000227197920731839	1.3997682141965
CNKSR3	-0.811167	10.7673671368134	-9.44743	7.78862537457866e-05	0.000230344452567326	1.38198760801084
ATXN3	0.685840259308254	4.44579	9.43898674495879	7.82837716270018e-05	0.000231110320484671	1.37615856211884
IFIT1	-0.867126	12.5925990704509	-9.4242	7.8985729132599e-05	0.000232124678607527	1.3659372237426
NLN	-0.754409	11.6755670337004	-9.42296	7.90448545857767e-05	0.000232124678607527	1.36508043725546
HSPE1	-0.878015	16.4218284411224	-9.41714	7.93233151394185e-05	0.000232533022236468	1.36105386242691
KIF26B	1.62469989388368	5.96017359993998	9.40519075046155	7.98983176124179e-05	0.00023339823778899	1.35278378098533
C8orf46	1.5673154964439	4.83991976233847	9.39844986980339	8.02249389313019e-05	0.000233942654086384	1.34811254611081
MPZL2	-0.72156	11.4323923839727	-9.37717	8.12661331629918e-05	0.000236565288160332	1.33334762010551
HKDC1	0.993111997798367	7.54660375031534	9.35373429894495	8.24310855090181e-05	0.000238745333413665	1.31705024220864
ISM1	-1.35453	8.25767356826425	-9.35347	8.24444316824166e-05	0.000238745333413665	1.31686486988824
ZSWIM3	0.818502286384172	8.76934636101693	9.34251568320158	8.29955367349909e-05	0.000239924705847426	1.30923635168428
REM2	-1.00745	8.77143628413769	-9.32852	8.37061465784968e-05	0.000241560298430679	1.29947434283301
DVL2	0.535102049074792	13.0436	9.32541907678961	8.38643482156144e-05	0.000241598847709231	1.29731232465851
TOX2	-1.1039	13.6819771626737	-9.32217	8.403063549629e-05	0.000241660517254848	1.29504419746633
GPSM2	-0.840256	12.2542151577217	-9.31372	8.44649495366757e-05	0.000242491455812694	1.28914133657964
MTFMT	-0.757841	10.2529074024954	-9.2962	8.53735116158471e-05	0.000244678724012428	1.27689039275652
LINC00426	-1.50132	4.75279625668545	-9.25182	8.77264941081154e-05	0.000250991067190972	1.24575915406373
JUN	1.44560151548573	11.8050691990608	9.24713179277998	8.79794852618991e-05	0.000251283872289123	1.2424617824759
MAP1LC3B	0.755934656068913	11.5958407751496	9.20436519975925	9.03258721301704e-05	0.000257323655065055	1.21232411874841
TMCC1	0.537166906608949	10.9896972447399	9.20181697210165	9.04679483513725e-05	0.000257323655065055	1.21052447092358
CTPS1	-1.06241	13.3090464504289	-9.20022	9.05569457573064e-05	0.000257323655065055	1.20939859969328
STK32C	1.33470571845754	7.6522987669724	9.19486065387616	9.08571141366295e-05	0.000257737527856969	1.20560942992381
CIRBP	0.740341455445424	9.8344731146834	9.17512344048552	9.19718735074441e-05	0.000260456850611913	1.19164602941055
PLIN4	-0.925964	7.94461005677033	-9.1575	9.2980691157098e-05	0.000262867445508541	1.17915476611684
PRMT3	-0.673353	10.5158380940672	-9.15019	9.34030613659465e-05	0.000263614731570895	1.17396514500918
CHEK2	-0.732572	11.0311244233819	-9.09363	9.67454603747465e-05	0.000272404797437493	1.13370648696076
NAGK	0.848505635866587	11.9895830757074	9.08554207005771	9.72343299184685e-05	0.000273041855730649	1.12793502427343
IDH3A	-0.705755	10.6805216617148	-9.06814	9.8296420340342e-05	0.000275098035449145	1.11549564366686
ASL	0.571803496994544	12.7187968197607	9.06469912370678	9.85081445942303e-05	0.000275228785901467	1.11303196936982
LPAR5	0.509867729385768	9.87296979303558	9.05515591383891	9.90978056081894e-05	0.000276413277181371	1.10619834490144
SGOL2	-0.819051	10.3138680641989	-9.04894	9.94837682797185e-05	0.00027702658679561	1.10174738181282
WDR4	-0.810207	10.5604428304117	-9.03916	0.000100095433006477	0.000278265303758007	1.09472885046051
ZNF607	-0.741449	12.0147016221855	-9.02604	0.00010092229512011	0.000279631874186617	1.08530892749006
CKAP4	-0.840615	15.0736308535546	-9.01424	0.000101672413226318	0.000281243093302651	1.0768298414201
FAM129A	0.782023676185567	13.4170223783037	8.99824488939408	0.000102700124321818	0.000283615575113896	1.06531396832468
SNX33	0.580158913140828	9.44545773213081	8.99270028180783	0.000103059102272963	0.000284136500150913	1.06131863581924
CBX6	-0.949891	15.0659243432438	-8.98213	0.000103747715815948	0.000285092569985176	1.05369335553627
HYLS1	-0.73364	11.0474921115773	-8.97257	0.000104374843796558	0.00028634414383661	1.04679284638196
LRRC2	-1.57859	8.93308782373928	-8.9677	0.000104695644838354	0.000286514046552992	1.04327897665151
RASA4B	-0.81501	8.95591699245315	-8.96642	0.000104780316784967	0.000286514046552992	1.0423533253264
BAG2	-0.818258	12.0386607768963	-8.91856	0.000108001512705706	0.000293896148998492	1.00768316582285
SORD	-0.951794	9.7660435175537	-8.91845	0.000108008596724266	0.000293896148998492	1.00760806519275
MED31	0.746059972615802	8.67785820264676	8.91500210246376	0.00010824521469132	0.000294060290073489	1.00510240644982
GLRX	-0.896416	11.8777665490014	-8.89377	0.000109714162210404	0.000297566215556022	0.989668569675539
THADA	-1.03166	8.32454937624159	-8.89088	0.000109916106094008	0.000297629975592215	0.987562978610793
ACSL1	1.51636000566325	11.3126029721549	8.86810193380733	0.000111521437534855	0.000301487451877047	0.9709611818136
C9orf40	-0.729628	11.3264015938179	-8.86324	0.000111867246766849	0.00030193295729305	0.967416246900429
FAM66D	-0.864779	7.25080687382659	-8.8567	0.000112335078105641	0.000302705832439755	0.96263785592719
LAMB3	0.644335060334534	18.4511342588599	8.84920770648891	0.000112873561252552	0.000303666290595575	0.957162417159191
FBXO3	-1.15356	9.36554391744798	-8.84144	0.000113435255379224	0.000304685999955789	0.951478739815537
GNG11	-0.631101	11.4091226138766	-8.81579	0.000115311590450966	0.000309227866354039	0.93269452508922
CLEC1A	1.58075172570458	5.17826631982962	8.79956778853984	0.000116517103024826	0.000311866129127187	0.920786664652795
TRIM35	0.517941111726206	10.6485488712797	8.79753281012654	0.000116669343270603	0.000311866129127187	0.919291633494492
CATSPER1	0.834786212419312	9.5781006841687	8.79314091415027	0.000116998692145048	0.000312246109596705	0.916064025946577
PHF11	0.531457758812117	10.4582113746682	8.78827121716965	0.00011736512735215	0.000312723693967071	0.912483639686528
TRIP10	-0.719827	10.9165822893282	-8.77705	0.000118214289682686	0.000313983177055288	0.904229401516984
TSTD1	-1.66921	5.13234775347294	-8.7679	0.000118912606597946	0.000315335815270865	0.897485779335296
ABCD3	-1.28263	11.4513939885934	-8.75662	0.000119779078184705	0.000317129368908076	0.889173165249527
DUSP10	0.697631159093055	9.09367889444684	8.74532506447647	0.000120654771437318	0.000318941614512593	0.880832989103334
TDRD12	-1.94255	5.61087267333985	-8.73839	0.000121195988061531	0.000319865360896571	0.875708626600149
FAM110C	-0.673145	8.87038138211767	-8.71316	0.000123188656339317	0.000324610866941517	0.857036942524969
ARHGAP19	-0.634024	10.1928699705521	-8.68401	0.000125537753705138	0.000329694850264988	0.835409754496856
NAE1	-0.74012	14.7754402331113	-8.68189	0.000125710986072262	0.000329694850264988	0.833830942583305
TG	1.47975331928302	7.61499971813925	8.67807061221027	0.000126022759375864	0.000329993661913566	0.830994968013465
EIF1AD	0.534346374585375	13.2970364706244	8.66765072627653	0.000126878873812258	0.000331714673227031	0.823243479265466
ACP5	1.3955545631424	9.82436674523349	8.65687097783151	0.000127771629691788	0.000333525944171992	0.815215778204703
TCEANC2	-0.804541	10.1195247140148	-8.64797	0.000128514290051462	0.000334940368446623	0.808580395026715
TP53I3	0.814207350410681	10.5032980831547	8.61261089964533	0.00013151398444061	0.000341690539013922	0.78216418738551
COL7A1	1.15565968097791	13.979381803204	8.60298459787698	0.000132344586847522	0.000343223399192571	0.774956210060456
HSPA4	-0.744096	13.5260582323815	-8.60041	0.000132567578041866	0.000343223399192571	0.773028797970511
IL4I1	-1.00956	6.15725698740506	-8.59742	0.000132827703087743	0.000343223399192571	0.770784517337246
MYO1D	0.806355245735787	11.8516089116662	8.59627564735796	0.000132927047888729	0.000343223399192571	0.769928560790921
CCDC88A	-0.803694	10.8448638536174	-8.56496	0.000135685269733482	0.000349803755665298	0.746415864112301
ZBTB34	0.526501932047598	9.75786330597577	8.56230007244859	0.000135922581308492	0.000349874792627415	0.744415280612214
GEMIN2	-1.00621	9.27050719805743	-8.55756	0.000136346805797745	0.000350425997027178	0.740847678894109
NOL6	-0.517695	10.7603583629254	-8.54631	0.000137359521491386	0.000352485664380973	0.732375758698579
RASSF5	-1.2448	8.33858691869156	-8.54179	0.000137768660511761	0.000352992512647647	0.728970803530778
CALCOCO1	0.67674358390256	9.15864419650845	8.52502349502941	0.000139299193669146	0.000356366648834562	0.716322460439587
DUSP19	-0.761546	6.75428681695645	-8.50947	0.000140736643350401	0.000359492681636246	0.704569388842364
ZNF19	0.850035474378329	8.28343310308744	8.50682368933539	0.000140982894557269	0.000359571052173585	0.702568017431522
RAP1GAP2	-0.856461	8.04780548954149	-8.49913	0.000141701492648603	0.000360852045401328	0.696747655401589
TNFRSF21	0.738105819114038	13.3800029203678	8.48714377749553	0.000142830013336455	0.000362067571801225	0.687666446692971
PLEKHO1	-1.0146	6.1499359178886	-8.48257	0.000143262986499556	0.000362614053841061	0.684201360270304
SCFD2	-0.751061	9.60468310753298	-8.45951	0.000145471361349887	0.000367645804138805	0.666689228860912
CDC14B	-1.17937	6.59254055474036	-8.45315	0.000146086378463625	0.000368084711899284	0.66185958224405
ADAL	-1.16354	9.14088137282128	-8.43571	0.000147790470157718	0.000371816748451092	0.64858315781095
KIF23	-0.664137	14.2638201957064	-8.41185	0.000150159088258267	0.000377206866287334	0.630381788782977
AP5Z1	0.549102834014082	8.59436740414819	8.40013490357811	0.000151338513097289	0.000379597954656057	0.621425545837406
POU2F1	-0.77005	12.3222218662639	-8.38758	0.000152613799971872	0.000382221949479103	0.61181963664178
ABTB2	0.61229082599799	11.1503778497159	8.36717660408646	0.000154713154188475	0.000386319672434695	0.596180235787092
CREBRF	0.703001283070613	10.4662109117871	8.35715967631404	0.000155755945989088	0.000387801047445884	0.588490627085699
ZNF10	0.555949478431797	8.80995906571291	8.35701177154258	0.000155771403950085	0.000387801047445884	0.588377027238495
DNTT	-1.70223	4.8268203831996	-8.33414	0.000158183165690762	0.000393159732082856	0.570789935424777
LRRC16A	-0.84485	6.87278085399784	-8.33162	0.000158452060822721	0.000393159732082856	0.568845751077783
ZNF584	0.803989086293585	10.5263355130211	8.32993816807229	0.000158630995019042	0.000393159732082856	0.567553838071749
NSUN6	-0.778922	8.89316690337099	-8.31056	0.000160714629779737	0.000397732941354009	0.552616401445901
TYSND1	-0.801423	9.77239635145514	-8.29598	0.0001623042247062	0.000400478471612341	0.541350512840314
VIM-AS1	1.11521994198429	8.46778027742493	8.29094924020072	0.000162856195057935	0.000401246873495769	0.537464373619025
EPC2	0.623499648092126	11.210950076833	8.28727081636224	0.000163261482101545	0.000401471772191012	0.534619343283588
CCNA2	-1.08547	11.9399215885291	-8.24017	0.000168554750859699	0.000412987372175275	0.498097549594311
JAG1	0.658938149573956	12.0108499730229	8.23967624858427	0.000168611750870121	0.000412987372175275	0.497710550006017
DOCK10	0.505526015336384	10.8043976183347	8.22186467383604	0.0001706658119098	0.000417405534113704	0.483851292937103
SDCBP2	1.63120830857308	7.84861335884342	8.21192815697744	0.000171824242408157	0.00041962347926326	0.47610855287695
ESF1	-0.716127	10.9641362969923	-8.20143	0.000173058584225053	0.000420660345943757	0.467915746991514
SLC2A1-AS1	-1.13789	7.69411428792559	-8.20117	0.000173088611069129	0.000420660345943757	0.467717176983909
NANOS3	1.12467033580051	8.56304263915361	8.1997399339673	0.000173257588527195	0.000420660345943757	0.466600357915576
HHIPL1	-1.36847	6.85974335165758	-8.19641	0.000173652110307095	0.000421005406965457	0.463997093955884
FAM13B	0.603085312418122	10.7163439643383	8.18914082618557	0.00017451527172102	0.00042248399598064	0.458322090242691
POLR3G	-1.05335	11.506846794478	-8.16302	0.000177659820985726	0.000427614114580362	0.437882802887534
DGCR14	0.775716343899154	9.35981259406419	8.1401375650606	0.00018046855638686	0.00043374863408254	0.419930295555126
PHLPP2	0.659714222389121	8.9454864039515	8.11485589599361	0.00018363135820093	0.000440715259682233	0.400046651019297
LYPD6B	-1.01639	8.33714331170502	-8.11235	0.000183947693041927	0.000440840160910825	0.398076842992406
EXOC7	-0.792168	12.2387838480773	-8.10743	0.000184572395494592	0.00044107656975121	0.394196784100515
LINC00526	-1.00446	9.32711002134662	-8.10741	0.00018457520724601	0.00044107656975121	0.394179349916861
NFIX	-1.07004	7.39899697378141	-8.10171	0.000185301117923369	0.000442177774958768	0.389687237006465
PSAT1	1.10406444525609	16.0516137284286	8.09929624914993	0.000185609672414366	0.000442281333695947	0.387783161680956
C11orf71	-0.994042	10.4687122236298	-8.08914	0.00018691416942971	0.000444754400297799	0.379768050539131
SULT1A2	-0.756928	11.957837493932	-8.07769	0.000188397360986576	0.000447645011574941	0.37072278356397
CEBPA	-0.698721	10.3617697026887	-8.06514	0.000190039236636962	0.000450903907127244	0.360792582034319
EXO5	0.507337661471364	10.6822629442628	8.05862221217408	0.000190898273416774	0.000452037414087584	0.355631242000204
SPDYE3	-0.954253	6.59829971258488	-8.05741	0.000191058978975867	0.000452037414087584	0.354668260271801
CLTCL1	1.00803798167567	8.72479983434292	8.04608829796867	0.000192562850727816	0.000454146147269573	0.345695860779363
CFL2	-0.807588	9.50727049571511	-8.04524	0.000192676307475268	0.000454146147269573	0.345021804925205
BCL11A	-0.603841	8.91322919529064	-8.04456	0.000192767069704351	0.000454146147269573	0.344482865228924
HIST4H4	-1.08506	8.93252734777984	-8.03357	0.000194242644766911	0.000456889485706284	0.335756481288367
DEPDC7	-1.30635	8.65910275150805	-8.03181	0.000194479337440924	0.000456889485706284	0.334362889947117
ABCA1	-1.99569	5.47473957389144	-8.00775	0.000197759256176219	0.000463289942839795	0.315224465376806
THNSL2	0.78770875480954	9.65969608354211	8.00017931984626	0.000198804353554309	0.000465085079563237	0.309193035057302
SEC24A	-0.500293	9.12710168046734	-7.97847	0.000201836894883598	0.000471154627150677	0.291869866724332
CDKN2B	0.923847058851296	9.02620820694449	7.97757	0.000201963764036411	0.000471154627150677	0.291150829810727
ABHD14A	0.528688372099841	11.9512018860092	7.96170418345332	0.000204215275821809	0.000475741731942428	0.278464997889371
CALML6	1.77441384800598	7.25319427020183	7.95561475426583	0.000205087126165959	0.000476954559794766	0.273590270488896
SIPA1	-0.675819	11.2138430175175	-7.95408	0.000205307778137075	0.000476954559794766	0.272359843343636
NDUFAF4	-0.871229	11.6197047007054	-7.94519	0.000206589694754403	0.000478599459514367	0.265237559326817
DHODH	-0.764629	12.5558755023555	-7.94187	0.00020707016332047	0.000479047201690076	0.2625794932628
RELT	-0.747344	12.3183254679858	-7.93743	0.00020771631143863	0.000479876464653233	0.259014573686242
FBXL16	0.701333048380882	12.9421009422178	7.9339963245809	0.000208217165454547	0.000480368232334972	0.256258903382365
ICAM5	-0.784955	11.6890545308982	-7.91957	0.000210336179713241	0.000484586668179124	0.244673219394601
PRDM8	-0.983414	8.58807090789909	-7.89981	0.000213280070492738	0.000489615538154391	0.228770127599789
UROS	-0.708803	6.59773018718176	-7.89901	0.000213399578080481	0.000489615538154391	0.228129193569872
MCTP2	-0.517626	10.7166499013527	-7.89508	0.000213990960766933	0.000490297970548413	0.224962818045228
SCD	0.618878950491773	13.5645515307853	7.86230900306061	0.000218997445244692	0.000498869086558628	0.19850317612204
PCNXL2	0.585313229584392	11.8129666059951	7.86082542664733	0.000219227242474505	0.000498869086558628	0.197303273137585
HTRA1	0.949754843536766	14.5192248513456	7.84796961132101	0.000221230209098025	0.000501374984749328	0.186897683431889
TMEM161B-AS1	-2.2556	7.20521758817246	-7.81932	0.00022576961000691	0.000509121096508399	0.163660270563573
KIAA1683	-0.974164	8.40794480583371	-7.8187	0.000225869071592455	0.000509121096508399	0.163156378961597
PLS1	-0.854802	10.4147130070542	-7.81238	0.000226886523300553	0.000509349557019276	0.158014504531602
RAB4B	0.56900248547538	9.76485747526434	7.80629	0.000227870856013652	0.000510871757837058	0.15306194378444
SNORA66	-1.60175	8.18267966049754	-7.79739	0.000229318203849649	0.000513016729229903	0.145818569870082
PDE2A	0.534939008407317	9.64142007457317	7.79662593924709	0.000229442733816252	0.000513016729229903	0.1451974908812
TCL1B	0.73237365757493	7.89763750367166	7.78444777569014	0.000231441846037061	0.000516793840950225	0.135273117717142
TRAF5	-1.67663	8.07086567765123	-7.77062	0.000233736078659374	0.00052121895615486	0.123988961374382
IGFBP7	0.655884349441222	7.67129223192635	7.76872450532508	0.000234052653232674	0.000521228071551536	0.122440613319913
HGSNAT	0.505281181070654	12.2453067431389	7.76110275505064	0.000235330422264457	0.000523374859116153	0.116212374913108
PXMP4	0.509670925126388	11.935010619421	7.74493133096497	0.000238068226289763	0.000528758723636917	0.102980792798206
PFKFB2	0.742356259655839	8.73868817235579	7.74289889133154	0.00023841490421192	0.000528824548172183	0.101316213692296
PXDN	0.60022595543297	13.1060292583078	7.72621501912226	0.000241282792174003	0.000532354097018832	0.0876383172136421
CARD6	0.590461111496607	12.9802130299914	7.7218969996251	0.000242031500567591	0.000533300585134401	0.0840942977993659
PLD6	-0.828142	11.8523867231115	-7.69699	0.000246403178394347	0.000541502637103783	0.063617776257173
PITPNM2	-0.947666	8.42707	-7.68978	0.000247685890978231	0.000543073774587353	0.0576787235020397
ZNF318	-0.993196	7.77729135759124	-7.68931	0.000247769270060537	0.000543073774587353	0.0572937398911169
SLC1A4	1.81658571552882	7.72326437538959	7.67663483703123	0.000250042744297992	0.000547337660746785	0.0468462330667876
CLCN6	0.812470761249802	11.7963849789603	7.66389774518388	0.000252351930760011	0.000551041695461026	0.0363316212854699
PSORS1C3	-0.780199	8.59190011247594	-7.66366	0.000252395596721957	0.000551041695461026	0.0361337236846193
TP53INP2	0.902284316188864	7.67415769852495	7.64924295195891	0.000255039229285183	0.000556085535225732	0.0242160549753709
SH2D3C	2.19328679922451	10.9015192107565	7.64539504866954	0.00025575028404888	0.000556907929234375	0.0210316999722657
LEF1-AS1	-1.4445	5.3044553422383	-7.62961	0.000258691569972518	0.000562578277332672	0.00795317366698178
GNL3	-0.868894	12.9457799209278	-7.62643	0.00025928924951985	0.000563143838800923	0.00531379780709962
GSN	0.509453630785492	13.0811461627333	7.60486822063675	0.000263379529447203	0.000570541630023292	-0.012587
ZSWIM1	-0.735916	9.15610587699191	-7.57162	0.000269835343441111	0.000582440051328658	-0.0402811
NPPA-AS1	3.19861705397581	6.6916355007156	7.5614642163637	0.000271842553904074	0.000585311855873254	-0.0487564
ZNF585B	1.30134609645864	6.50621343017455	7.56080334530694	0.000271973810466719	0.000585311855873254	-0.0493084
HSBP1L1	-0.782541	11.0653696087421	-7.5333	0.000277500728560248	0.000595715849727791	-0.0723142
SERPIND1	-0.979147	6.14707031137229	-7.51919	0.000280388400597434	0.00060114119819604	-0.084152
TRPS1	1.82279604046841	5.15504158393888	7.51646926753008	0.000280947998331718	0.000601567729418877	-0.0864319
ZNF852	1.06752972777526	5.95787288146451	7.4880640889226	0.000286876930684208	0.000613475282540075	-0.110312
PAXBP1-AS1	-1.55549	4.91872080981728	-7.48435	0.000287662484895234	0.000614367509353713	-0.113438
SLC37A2	-0.808909	8.55775148203153	-7.47532	0.000289583569948197	0.00061767953283068	-0.121049
LYST	0.595472727226904	9.52995337757948	7.45216159812039	0.000294577916388346	0.000626729546601737	-0.1406
EPG5	0.649680622201341	8.70047560936383	7.43965995107059	0.000297315125825842	0.000630812840497039	-0.151175
PTPRJ	-1.69889	7.11826250570178	-7.43914	0.000297429982368629	0.000630812840497039	-0.151617
TTLL1	0.661229285771373	9.13047405106673	7.43822253013476	0.000297631717908375	0.000630812840497039	-0.152392
CD83	-0.741486	11.1634630993707	-7.42267	0.000301082419356548	0.000637316593257261	-0.165571
TSGA10	0.68284968784356	6.89991305358831	7.4173826130204	0.000302265567860508	0.000639010097834381	-0.170055
PLLP	-0.858219	9.51143135487608	-7.40115	0.000305931851587863	0.000645942187909564	-0.183838
SNRPE	-0.871091	13.9773625608388	-7.39645	0.000307004238118659	0.000647386939547312	-0.187839
ANKRD10-IT1	-0.779885	10.1585168570046	-7.39369	0.000307635290449413	0.000647898566249522	-0.190186
SPTLC2	0.504542900040962	10.6113034062322	7.38833347145921	0.000308863955301896	0.00064966592363627	-0.194743
HCN3	0.559800128485467	10.0516746904822	7.34858772082974	0.000318162309657536	0.000667540544036189	-0.22865
HCLS1	0.774366391165465	9.73336297192975	7.34574365540487	0.000318839919119956	0.000668121840567949	-0.231082
KHDC1	-0.666266	9.21829070356087	-7.34245	0.000319626643462806	0.000668278781267818	-0.233899
C16orf62	0.547442707233383	9.33744754255711	7.30438998529585	0.000328882547639698	0.000685720111828771	-0.26653
CD9	0.626964081763868	15.1846800686865	7.29590992885732	0.000330986583239814	0.000689245469218489	-0.273819
HRASLS	-1.24434	6.54703576966975	-7.29176	0.000332022156275224	0.000690539846218297	-0.27739
NUFIP1	-1.01652	7.64175803188184	-7.27771	0.000335554513879625	0.00069544518456046	-0.289485
C1orf233	0.606050932431195	9.72718120865377	7.27740658849623	0.00033563151892756	0.00069544518456046	-0.289747
JUND	0.613672167565015	10.1887016520856	7.2607495529437	0.000339877180274793	0.000702497071497341	-0.304114
CNTLN	0.610259507145312	8.36955663808804	7.25241247506375	0.000342025363249481	0.000706062259777395	-0.311315
MAP3K5	-1.08083	8.74219961214372	-7.2419	0.000344757590467057	0.000710822819405502	-0.320409
ARMC8	-0.69245	10.3082389623368	-7.23726	0.000345969125563387	0.000711561654056387	-0.324418
SNX29	0.977549380973672	10.1734870063025	7.22995824939808	0.000347889136664717	0.000714629408813728	-0.330742
SSR4P1	0.572422851740106	7.71463696396687	7.22329279613757	0.000349651964946976	0.000717367131035125	-0.336519
FMO4	0.567538489715462	9.70562126515661	7.20638938157457	0.000354168686126651	0.000725741238893433	-0.351186
TTC7B	0.522641283522475	12.8633033806038	7.18809018121192	0.000359134164737167	0.000734112483800973	-0.367096
ZMIZ1	-0.805667	9.6234296469608	-7.13432	0.000374194377631116	0.000761166124254515	-0.414035
GEM	0.572225115914009	8.16674362945453	7.1049225479634	0.000382734169422439	0.000776643059119986	-0.439816
TRAF1	1.06494434075664	7.8829131027449	7.10313563374174	0.000383260448465141	0.000776766012199095	-0.441386
UBE2O	-0.729291	12.5432311153233	-7.0924	0.000386439634470719	0.000780364782442081	-0.450824
HIST2H2BF	1.68451534545259	7.06262603303079	7.07783277847634	0.000390802581253727	0.00078726896803287	-0.46365
ZNF316	-0.673287	7.5920898758231	-7.07143	0.000392739445945416	0.000790216400285832	-0.469297
PIP5KL1	0.841939349182354	9.44911543406879	7.06459899849888	0.000394815079915751	0.000792480810228006	-0.475319
ORAI3	0.880688024927142	9.25364259472424	7.05459021099918	0.000397881208638137	0.00079767530770242	-0.484156
FAM66C	-0.804899	4.56176678005286	-6.999	0.000415417593023863	0.000831832587231456	-0.533422
IFNAR1	0.795660094759121	9.93838819960221	6.99309291785907	0.00041733216302166	0.000834664326043319	-0.538674
MICA	0.810500372474799	12.5555574169012	6.94873294599197	0.000432041810314633	0.0008609865467202	-0.578235
FAM64A	-0.689449	11.3866191154756	-6.92416	0.000440445930780647	0.000874728126856049	-0.600236
C2	-0.738326	9.5270973464955	-6.90796	0.000446087611450217	0.000882650220520715	-0.614769
CELSR3	0.627105484245764	9.79792322725402	6.89976064774413	0.000448977117664568	0.000887314967138032	-0.622142
EPB41	0.780874144412286	5.95919937713369	6.88158120075004	0.000455456898785362	0.000897211980775012	-0.638503
RHOB	-0.981907	10.0109676141876	-6.88119	0.000455598649710093	0.000897211980775012	-0.638858
TLE6	-0.851214	8.83820300854334	-6.83514	0.000472502918827114	0.000928309621441255	-0.680453
G2E3	-0.82735	8.04527342061828	-6.81754	0.000479152216793845	0.000940265761896628	-0.696406
KCNN3	-0.572046	4.41640977877283	-6.797	0.000487052131253152	0.000953524594988566	-0.715073
TMEM106A	-0.684347	5.62303670437612	-6.78729	0.000490837366801444	0.00095980859065042	-0.72391
ANKRD37	0.767222128442684	10.1583818923498	6.77800502210569	0.000494489163620429	0.000965817242293765	-0.732371
SGK1	1.14764298671539	11.3381967451202	6.77204953618123	0.000496847686640547	0.000968201126589245	-0.737802
NADSYN1	0.694095679488633	13.4511501680335	6.75167875522614	0.00050501317954188	0.000982919467299714	-0.756407
RCSD1	-1.414	4.82148385113983	-6.74979	0.000505776588874029	0.000983257983964895	-0.758131
PDS5A	-0.976314	9.57117655356148	-6.7247	0.000516065601598886	0.000997447767632609	-0.781115
SCGB3A1	-0.909496	15.2962812262876	-6.70547	0.000524112735925919	0.00100949196711828	-0.798773
KIAA1045	-0.816878	7.76490757878055	-6.69781	0.000527359328313522	0.00101340479219695	-0.80582
ZNF264	0.658113097874422	10.6481683921859	6.6864764204365	0.000532203125891975	0.00102036185515841	-0.816253
PITPNM3	-1.00426	9.88980102418688	-6.68046	0.000534794707176145	0.00102415335427073	-0.821796
NRBP2	0.513132322568762	11.3322579479371	6.66157591768704	0.000543027186220019	0.0010361952641942	-0.839227
LOXL3	0.885963602131013	4.40141552142005	6.65330707550423	0.000546677276241259	0.00103974651855236	-0.84687
ADCY9	0.502596340073168	9.45658973253675	6.62021479823814	0.000561569486393776	0.00106685410399182	-0.877534
GAREML	-0.808685	4.24564651809812	-6.61521	0.000563862504691957	0.00106999164712877	-0.882183
C11orf80	0.599477305901424	10.0328396236623	6.59677424840064	0.000572399853848677	0.00108372639752508	-0.899326
MMEL1	-1.04536	4.40919547675782	-6.59355	0.000573910531814441	0.00108535461118649	-0.902332
PAG1	1.01731283317157	8.26547594992345	6.58755817764379	0.000576723453588253	0.00108943909466048	-0.90791
LRRC29	1.14974818692755	4.83197147926524	6.58528618992971	0.000577795072589872	0.00109022871162885	-0.910027
KLF9	-1.05292	10.2101563255644	-6.5809	0.000579872592165296	0.00109291241099629	-0.914121
RASA4	-1.22192	10.2913231684552	-6.561	0.000589393995152822	0.00110835308220395	-0.932698
THAP2	-1.56136	5.14529241131849	-6.55084	0.000594325957336697	0.00111515274902211	-0.942202
C17orf51	0.865559978740032	11.346093754178	6.55079512842916	0.000594346998729412	0.00111515274902211	-0.942243
IGFBP2	-0.990441	7.90440844866324	-6.527	0.000606081986274432	0.0011358929810177	-0.964542
PIK3IP1	1.58668389497234	7.91034259486573	6.5182283921602	0.000610476107502683	0.00114284416084677	-0.97278
ARHGEF10L	-0.789572	10.0212354888599	-6.50635	0.000616485429984692	0.0011515091794115	-0.98395
SLC7A1	0.658043832274474	13.4719952129376	6.48074617110914	0.000629664195979194	0.00117088057847636	-1.00807
CAPN3	1.16481890408939	5.27428863005476	6.46003447640029	0.000640563066654059	0.00118467784107334	-1.02764
LCN2	1.43655073479186	9.0530571578469	6.45989885974534	0.000640635139477308	0.00118467784107334	-1.02777
MYH7B	1.21503333706943	6.9742252521628	6.4263654837561	0.000658744906699462	0.00121547179687467	-1.05955
CPEB2	1.91833629238021	6.0828095083237	6.41059737425142	0.000667462765983595	0.00122883873472477	-1.07453
RUVBL1	-0.6999	11.1549182184594	-6.39139	0.000678263032249505	0.00124597217818521	-1.09283
AKAP3	1.05940740142482	5.72064998490106	6.38519730824281	0.000681785341949947	0.00125106485189495	-1.09873
ZNF713	0.589423619480938	7.42740417954672	6.36911487011195	0.000691035851394395	0.00126664593420423	-1.1141
SLC25A15	-0.881998	9.87255695197782	-6.36641	0.000692603969066997	0.00126812669638172	-1.11668
XPOT	0.551901626951402	10.8916	6.35702773426027	0.00069808295233059	0.00127675697860463	-1.12566
IBA57	0.618597748585024	7.72134629674005	6.35547577234011	0.000698993732720004	0.00127702250402735	-1.12714
DENND1B	-1.02246	7.16973947426436	-6.33747	0.000709658532995274	0.00129226029807436	-1.1444
RHOU	0.632695985465215	9.60309329930103	6.32677067245761	0.000716087340487602	0.00130079055224881	-1.15468
PCID2	-0.78897	12.0115180889506	-6.32664	0.000716168710274038	0.00130079055224881	-1.15481
ANKRD22	-1.3186	8.9087701465733	-6.32192	0.000719024160607043	0.0013036220651006	-1.15934
TMOD2	1.2466418831667	5.01650483375401	6.30505396214262	0.000729337767342526	0.00132088533759754	-1.17557
NOC2L	-0.563625	10.2831192054511	-6.30099	0.000731848321979468	0.00132399457815808	-1.17949
CUZD1	0.673488592075896	7.78172051479866	6.29074443142116	0.00073822212187082	0.00133407854743286	-1.18937
AUTS2	-0.890527	7.24413503657119	-6.26816	0.000752496018612105	0.00135693336112972	-1.21118
GCFC2	-0.561351	10.872770573419	-6.24657	0.000766442937110113	0.00137761510678844	-1.23211
EDN1	1.20562604165325	9.72632432330729	6.23192034664143	0.000776069329954835	0.00139191789501577	-1.24632
LINC00205	-1.04946	7.20435375734088	-6.22758	0.000778945478777162	0.00139557578797025	-1.25054
RHPN2	-0.923501	8.03156894158478	-6.20708	0.000792711661744897	0.00141423838041079	-1.27049
LURAP1L	2.30909904594921	5.72114082501218	6.20561037572545	0.000793712421091195	0.00141423838041079	-1.27193
TNK1	0.600410433384171	12.2052290259246	6.20203539655921	0.00079614498753341	0.00141423838041079	-1.27541
C1orf54	0.885067161191174	9.02877941835038	6.19476115387462	0.000801121072654218	0.0014215637757311	-1.28251
GARS	0.608206115845091	13.6229912333461	6.18951306918553	0.000804733225816146	0.00142585890906847	-1.28763
GFI1	-1.40509	4.61444174969253	-6.18167	0.000810164677445497	0.00143151979023209	-1.29529
KIAA1841	0.824701563247794	7.29693566668325	6.1669461572041	0.000820479407916721	0.00144210711528461	-1.3097
TBC1D20	0.597353193559963	9.48261739180651	6.15470316335995	0.00082916934633237	0.00145584681019199	-1.3217
ARRDC3	1.38594946469347	7.87036334918921	6.1000326539499	0.000869280882341753	0.00151669509596867	-1.37548
LEFTY1	-0.930598	4.94387623974906	-6.07989	0.000884618932970533	0.0015370253960363	-1.39539
ATP8A2	-2.13087	5.34873562570418	-6.05967	0.000900322212997415	0.00155943660569023	-1.41542
STON2	0.775045244618193	10.3657341545682	6.05447537999896	0.000904406855645664	0.00156488655105495	-1.42057
CENPV	-0.803467	7.36071942395659	-6.04937	0.000908440699442941	0.00156861189096359	-1.42563
MLC1	-1.71292	7.58398524778256	-6.04355	0.000913072202334267	0.0015749787316376	-1.43142
CEL	-2.17814	6.9714024671605	-6.03932	0.000916448345177686	0.00157916925594667	-1.43562
LMO2	1.28101900093071	4.87652256992639	6.02647286385355	0.000926802104317142	0.00159371743299071	-1.44841
RPS6KA2	0.786109221391627	9.6666451601846	6.02225986713767	0.000930226042090411	0.00159795781483708	-1.4526
RNF121	0.538120745553949	9.94172789967028	6.01720201389804	0.00093435571403482	0.00160340054630667	-1.45764
POLH	-0.951193	6.36438778583041	-6.01374	0.000937197156372291	0.00160623449858101	-1.4611
TMEM136	-1.5806	5.1454529174263	-6.01196	0.000938658791122535	0.00160623449858101	-1.46287
PARD6A	0.56980994812747	7.90239042085271	6.01167058018602	0.000938896064818036	0.00160623449858101	-1.46316
MGLL	0.665382504101647	11.5104844636184	5.9999965940326	0.000948561397659832	0.00161779183159162	-1.47481
POPDC2	0.955473976204704	8.36685554082846	5.9883736147163	0.000958297619684521	0.00163106166289161	-1.48643
ACVR1	0.762433362493583	8.79433809933534	5.98669490680278	0.000959713238895722	0.00163180599640985	-1.48811
ASB2	-1.06154	10.0862253010112	-5.95978	0.000982741068496277	0.00166708266862657	-1.51508
PPP1R12B	0.669872774250457	8.3764393518968	5.95895077922757	0.00098345884048474	0.00166708266862657	-1.51592
ZFP36L2	-0.704754	11.0621188399477	-5.94875	0.000992354864284249	0.00167875041949911	-1.52616
PFKFB3	-1.01878	7.49692621544858	-5.93701	0.00100271654727587	0.0016928453449961	-1.53797
MBD2	-0.787451	4.85603248271577	-5.92752	0.00101117030082886	0.00170539136681754	-1.54752
RELB	0.638411813479177	12.6520759143464	5.92302908871247	0.0010152071818715	0.00171047028218349	-1.55205
STEAP3	0.817275578080055	9.84142903672271	5.91822618474638	0.00101954017009416	0.00171603733977503	-1.5569
SLC29A2	0.70572292186665	8.75501759992106	5.91416818730339	0.00102321760073104	0.00172049088510018	-1.56099
SRD5A3	0.729046985922993	8.22644147292785	5.86691292925466	0.00106717556196852	0.00178899380639546	-1.60882
SH3BP5	0.565508778100478	8.76099926658095	5.86163615384006	0.00107221663371979	0.00179563990466326	-1.61418
DZANK1	0.846340830209228	8.23180199471505	5.8540635153778	0.00107949859245474	0.00180602171736661	-1.62188
EIF4E	-0.6588	10.8469172223321	-5.83395	0.00109911516922282	0.0018351592615252	-1.64235
TMEM191A	0.590881000335102	12.7979760978942	5.82683363331827	0.00110615372560792	0.00184506441431401	-1.6496
HIC1	1.20392145925633	6.05518846477953	5.79646912454384	0.00113676742960171	0.00188857377746579	-1.68063
SFXN1	-1.24168	7.99167245846963	-5.77968	0.00115410414460473	0.00191166406474746	-1.69783
VIM	0.625026577975518	14.1904299363663	5.77469040860727	0.00115932065910035	0.00191835921805813	-1.70296
OTUB2	-1.04015	9.63659539058448	-5.76478	0.00116974827337887	0.00192991109791884	-1.71313
LOXL4	-1.604	5.2226625087347	-5.76029	0.00117451867469233	0.00193586674840593	-1.71776
SLC4A5	0.765175667390295	4.51992355536484	5.73949494324328	0.00119685560899268	0.00197073559308962	-1.73916
TCP1	-0.760254	13.1339109969032	-5.73549	0.00120121876364942	0.00197596932718662	-1.7433
MYL5	0.636841302865118	10.1368339950346	5.69410784634723	0.00124732363283743	0.00203974099958121	-1.78608
CUL7	0.551588912228814	8.20311426846816	5.68448360361806	0.0012583346126504	0.00205573176679811	-1.79606
SNAI3	-2.0391	5.59979125131078	-5.67515	0.00126911453908287	0.00207131414010786	-1.80575
GP1BA	-0.813045	5.64359770825038	-5.67406	0.00127038066773306	0.0020713538160105	-1.80688
C3	0.978477196163733	7.92359786258332	5.67111196102487	0.00127381740808808	0.00207492913739348	-1.80995
SEMA3A	-0.692739	9.89962991826594	-5.66511	0.00128083680654664	0.00208432760323882	-1.81619
IPO8	-0.676539	13.1996227758327	-5.63927	0.00131157028332601	0.00212390064836403	-1.84312
ZNF117	0.649646665455903	9.16274950005438	5.63918625123479	0.00131166989308498	0.00212390064836403	-1.8432
CXCL16	-0.72075	8.60187047010708	-5.63825	0.00131279470531374	0.00212390064836403	-1.84417
ULK4	1.0999606928245	6.77103278434423	5.6304179392095	0.00132228929167564	0.00213511959197965	-1.85236
SEL1L3	0.580828375496182	12.6384875138574	5.61504000965389	0.00134115118209934	0.00216139147028184	-1.86844
SLC23A3	2.03803959414544	6.33995893887931	5.61048285163222	0.00134679955523306	0.00216701895321139	-1.87321
TDRKH	0.95252803016299	7.69767846074484	5.61012728652147	0.00134724139956847	0.00216701895321139	-1.87358
TULP3	0.51918977525801	13.7278956551534	5.59220471716368	0.00136972844922486	0.00219894807825511	-1.89237
DUSP1	1.62131154830116	10.1024484407557	5.57639734348844	0.00138991707206761	0.00222921315020074	-1.90898
C1orf177	-0.805923	6.18766406288999	-5.56796	0.00140082563409094	0.00224455058373072	-1.91785
RINL	0.928595327788812	6.39770782166177	5.53574546244176	0.0014434117689328	0.00230393380916737	-1.95183
BBC3	0.562734774582966	11.4012282291423	5.52587	0.0014567542312791	0.00232300770341639	-1.96227
CYB5RL	-0.641637	7.06609995248759	-5.51646	0.00146960683667514	0.00234126475986069	-1.97223
EGLN3	0.986750010789299	8.33204568032471	5.5152690121279	0.00147124281096986	0.00234163455028408	-1.9735
DGAT2	1.16477812169604	5.20556248456902	5.50352437554849	0.00148748134066031	0.00236423343856819	-1.98595
ZNF641	0.609745876885438	8.25745014334979	5.50295306392523	0.00148827644514184	0.00236423343856819	-1.98655
GNAO1	-0.888397	8.27596309967285	-5.46187	0.0015467353821815	0.00244777477939159	-2.03025
ZSCAN9	0.606915110197788	8.55157133255786	5.45952419254394	0.00155015814731362	0.00244854525541583	-2.03276
TMEM38A	0.670155844729932	9.35202657567092	5.44844429208474	0.00156641137466167	0.002468986880728	-2.04459
CCDC153	1.60107325850598	6.96568277639909	5.44767960911026	0.00156754023182911	0.002468986880728	-2.0454
ZNF718	0.896632465638891	7.8640229297762	5.42585477912136	0.00160015260220098	0.00251323403057555	-2.06875
C17orf99	0.689851994952896	8.68239116196163	5.42208379754799	0.00160586537824641	0.00251983391431327	-2.07279
ARSG	1.50721895742805	5.08421080802936	5.40422917086652	0.00163323089293271	0.0025579616238608	-2.09194
NIPAL2	0.778213338059206	6.80945712627433	5.40299957753071	0.00163513491334915	0.00255854130906791	-2.09326
ARVCF	-0.909877	7.89319263270989	-5.39714	0.00164424491620701	0.00257038474248668	-2.09956
HIF1A	-0.581495	12.2194091564726	-5.3914	0.00165322152531064	0.0025819976631256	-2.10573
UST	0.889697358391658	7.63295074387512	5.38930201404342	0.00165651717003089	0.00258472463948693	-2.10799
LINC00470	-1.12245	6.47864474005846	-5.34617	0.0017259454113098	0.00268301672513024	-2.15452
ATP8B2	-0.8663	6.05478069319992	-5.32975	0.00175325330886077	0.00271534495745568	-2.1723
LPIN3	0.534950432670339	13.2679186631765	5.32333813734922	0.00176404589178012	0.00272952555425717	-2.17925
FOLR3	1.72676278744662	7.49595188522736	5.32141415926012	0.00176729924895418	0.00273202515964373	-2.18134
EPS8L1	0.644917822274239	11.855473554717	5.29256510226152	0.00181690876096166	0.00279575997535429	-2.2127
TRAPPC6A	0.679734174481931	12.5541996271085	5.27956456250205	0.00183978074097919	0.00282574058559234	-2.22686
LCAT	0.534591168155956	9.28257851802142	5.27532823014989	0.00184730431123413	0.00283208050656115	-2.23148
SCG5	1.33660554491165	5.80991873525019	5.27031190474933	0.00185625836907456	0.00284319463692963	-2.23696
LINC00174	0.718289015079701	10.6418644123398	5.26549128606943	0.00186490958764855	0.00285378261469383	-2.24222
SLC33A1	0.568098050365851	10.1012876188731	5.25565125528974	0.00188271136401677	0.00287315878790482	-2.25298
RARRES3	-0.775831	10.5627031973032	-5.24465	0.00190284667076991	0.00289984242465729	-2.26502
C6orf120	-0.69244	9.97990752876527	-5.23809	0.0019149622923399	0.002914376919364	-2.27221
TLR9	-1.05017	5.57259944053167	-5.22764	0.00193445051119032	0.00293867345415797	-2.28367
ITIH2	-1.63488	5.06813760194502	-5.21505	0.00195823825572814	0.00296670427843282	-2.2975
GZMA	1.05690438453614	4.58504547800842	5.20789969404345	0.00197188779788947	0.00298224922452863	-2.30537
EEPD1	0.535413156582145	9.52090472926334	5.19214461137909	0.00200235578616794	0.00302529841605808	-2.32272
CITED2	0.794032050386511	12.2987616961717	5.18351616244339	0.00201926826206562	0.00304809001006828	-2.33223
IL32	1.00968855677123	8.08671505851958	5.1605043191409	0.00206517204141075	0.00311174974261349	-2.35767
GAB2	0.923772372140564	6.39544004100434	5.15599345648868	0.00207430847816912	0.00311987965877916	-2.36266
VWCE	-1.09941	5.67601602253014	-5.11612	0.00215709716013634	0.00322693996691249	-2.40692
BICC1	-2.40091	5.51285933402499	-5.11392	0.00216176214068152	0.00323102083392185	-2.40936
ZNF529	0.648136817219997	8.64038367269119	5.06590626675213	0.0022667354432339	0.00337581671367334	-2.46297
SPRY1	-0.705123	10.2228251402086	-5.03687	0.00233301423668606	0.00346111864186141	-2.49554
ZNF623	0.942786276425515	7.10445040749292	5.03627770286474	0.00233438757319789	0.00346111864186141	-2.49621
ADD2	-0.694707	5.73717083220103	-5.03241	0.00234337780012523	0.00347136249610025	-2.50055
GUCY1B2	1.05555236942223	7.45665895619746	5.0133203462012	0.00238838280815104	0.00352238949955431	-2.52204
KIRREL3	-1.50263	6.28118942667233	-5.01029	0.00239561869173371	0.00352993990972776	-2.52546
CCDC171	0.605790902039011	8.39930766717519	4.97969470804582	0.00247004403523388	0.00362041603758358	-2.56002
CREB5	0.546481014441503	6.81211541662769	4.93164657852139	0.00259227913267753	0.00378958947704305	-2.61455
ROR1	-0.64877	7.80363014394308	-4.92461	0.00261074273531536	0.00381323895140632	-2.62256
LMBRD2	0.763171389949939	6.38535265462379	4.90488996634188	0.00266330996074744	0.00388661506082828	-2.64506
ZNF540	-1.25075	4.52168481480466	-4.88685	0.00271244885259063	0.00395141020621936	-2.66569
P4HA1	0.570861645815786	12.5935572619321	4.83463197021864	0.00286054837761232	0.00414183567175118	-2.72565
LY9	0.630390256188582	11.3611036860265	4.83090578970419	0.00287146168413237	0.00415403130020191	-2.72995
MICALL2	0.741854884614028	14.0041139029857	4.8185111215531	0.00290810368749252	0.00420339423807412	-2.74424
ABCC6	-1.03883	6.74990300071014	-4.79886	0.00296728823728856	0.00427412502573171	-2.76696
TRA2B	-0.58577	15.2872188163224	-4.78848	0.00299909765348196	0.00430699440783209	-2.77898
WFDC3	0.50559595269069	11.5753910659174	4.78804569273292	0.00300043615221876	0.00430699440783209	-2.77948
SEMA6B	-0.815845	6.47972875062257	-4.7536	0.00310884041319142	0.0044396796311672	-2.81947
PPIL6	-1.47414	6.97786881850526	-4.75084	0.00311772456102481	0.00444475604084562	-2.82269
KLHDC9	-1.37495	5.02009645672026	-4.70961	0.00325379664905555	0.0046150789205992	-2.8708
ZNF530	0.554426457113674	7.06499099041697	4.68423498987763	0.00334086035205377	0.00472250429425906	-2.90053
ANKAR	0.637540723741019	7.23865137521447	4.68013610078923	0.00335517053659404	0.00473470766077737	-2.90534
WDR33	-0.631276	7.60953123598702	-4.63561	0.00351516980241733	0.00494281012224836	-2.95777
ADAMTS6	1.66692011644726	6.14382861902064	4.62379515460101	0.00355904828756293	0.00499704759566917	-2.97172
GLIPR1	0.589402211498733	8.01810237617904	4.62176	0.00356668175560337	0.00500355354781028	-2.97413
ZNF717	-1.41102	4.76465155658044	-4.60889	0.00361531399183535	0.00506326090544195	-2.98937
OPRL1	0.697911488078955	7.25830659889158	4.59453008845204	0.00367043975563727	0.00513184703470491	-3.00638
EPHA4	0.62682597732447	9.21329183231703	4.54951944166992	0.00384952104001866	0.00534637892985106	-3.05993
NAIP	0.617219884599148	4.4111771274663	4.53341485344992	0.00391597129000356	0.0054251163718654	-3.07917
PRSS33	-1.25535	5.00588769301042	-4.53068	0.00392739970569786	0.00543643378348883	-3.08244
NEK11	0.797465566837759	8.01867832166548	4.4940149515527	0.00408405899601125	0.00563458263469542	-3.12637
MFSD6L	-1.34725	4.73257887424489	-4.44991	0.00428190692243901	0.00587353679821404	-3.17948
IZUMO4	0.966583271920104	7.00361	4.43820055038657	0.00433625896829443	0.00594320456788423	-3.19364
ZNF780A	0.829931754014297	4.62691966960989	4.43576673380806	0.00434764852529067	0.0059539226109892	-3.19658
TARSL2	0.636486128419286	6.58619908486756	4.42677960745209	0.00438999822029004	0.00600617597717206	-3.20746
FGD4	0.732708214507766	7.76629840219334	4.42028377260474	0.00442089724428619	0.00603935839759981	-3.21532
MROH1	0.520320283883089	10.3342258627342	4.41461721035987	0.00444805150263998	0.00606156038104859	-3.22219
SCN4B	1.07965377443845	6.25405801863513	4.41332966600209	0.00445424755857089	0.00606504892056836	-3.22376
CLIC3	1.50523925685293	8.86133787338162	4.38720012950372	0.00458211203049624	0.00622391112937112	-3.2555
PDE4A	-0.554452	9.08310469109358	-4.37748	0.00463072320848633	0.00627971244858146	-3.26733
ABLIM2	1.1602578331372	5.63967353372027	4.36643133456379	0.00468669056657876	0.00634529209825761	-3.28079
EID2B	-0.581286	7.14119730219095	-4.34326	0.00480655699302409	0.00649703165669707	-3.3091
SLC41A2	1.31994508753843	7.20347997073191	4.33675000333282	0.00484083503815823	0.00653277738159218	-3.31706
CCDC176	1.11371798089921	7.76158	4.32008637133564	0.00492986604006978	0.00664754774036895	-3.33748
ADTRP	0.767222178713003	7.60154821238094	4.29129089492826	0.0050880835236513	0.00681133492572261	-3.37285
IL6ST	0.563641978015895	7.37587131948672	4.2581668926158	0.00527717518094075	0.00704186256144733	-3.4137
GLUL	0.728092238410731	9.35495028137786	4.2317545816219	0.00543361010407544	0.00722172243314568	-3.44638
UPP1	0.535366222220679	13.8207296783283	4.22970115818312	0.00544598835081638	0.00722730339000359	-3.44893
MAF	0.573370173486925	9.80370070419109	4.2260032394433	0.0054683596089687	0.00725057537977725	-3.45351
LZTFL1	0.605955063620766	8.13312471216007	4.18291104815233	0.00573679215676001	0.00757638109063792	-3.50709
ISL2	1.21080640076743	7.35513885766424	4.17380847509509	0.00579536479428572	0.00764163515957991	-3.51845
PPIEL	0.792282814436621	7.58110952689173	4.10252832172054	0.0062778998501528	0.00823234036953999	-3.60777
CCDC64	0.993901327070209	5.7605755956062	4.09927399069194	0.00630097993569841	0.00824963464108708	-3.61186
PPP1R3G	0.530165323131117	8.67158460872311	4.0920448614833	0.00635259014346743	0.00831068263474797	-3.62097
FBXO25	0.508928597990124	7.25027150981553	4.0698859983159	0.0065137559574468	0.00850817927722887	-3.64892
KAT2B	0.668400722698014	7.07484022126125	4.06761518152691	0.00653052871026532	0.00852341305846836	-3.65179
STX3	0.528439082206571	9.51272631723312	4.03430385761346	0.00678220501783439	0.00883116156888974	-3.69395
CRYM	0.757681406098225	8.27064580926749	4.03116591610811	0.00680646624680528	0.00885583907930672	-3.69793
IL15RA	-0.914727	6.63864750781172	-4.00018	0.00705134171173913	0.00916015418627793	-3.73732
CLK4	0.739480477014015	8.36823814031346	3.99802662052101	0.00706868983917761	0.00917554447606868	-3.74006
TMED6	0.938581129418916	6.17868666572198	3.98646030969835	0.00716285189955872	0.00928332320781969	-3.7548
TET3	-0.715987	6.70697105419575	-3.9242	0.00769439835741942	0.00990734200948716	-3.83447
ULK1	0.514609796765299	12.2440018551281	3.92381691728685	0.00769779091384614	0.00990734200948716	-3.83496
ITGB2	0.637923414969347	12.5692352279953	3.89389861022555	0.00796888156674414	0.0102325592404382	-3.87345
METTL25	0.696872125230151	8.97210764162135	3.70745645250784	0.00991776002213708	0.0124851499750375	-4.11617
ACSS1	-0.663305	7.24402788564413	-3.68112	0.0102334984811237	0.0128438491094916	-4.15085
SPOCK2	-0.609357	11.1487954143974	-3.66998	0.010370331955734	0.0129960283261941	-4.16554
HLA-DQB1	0.544540587862981	4.46941391019048	3.57673880810593	0.011598945126988	0.0144704865159432	-4.28924
PLA2G4C	-0.819448	9.23373844409649	-3.55731	0.0118746870444086	0.0148034215172448	-4.31515
MIR181A2HG	0.500991389452677	7.94383	3.5151240895885	0.0124988399141346	0.0155235033334151	-4.37162
KCNMA1	0.839876243947137	5.1306830657681	3.50032942021777	0.0127262225290562	0.015789081165584	-4.39148
NSG1	0.611277314455136	8.22161005806493	3.49998286633823	0.0127316032180518	0.015789081165584	-4.39194
LCP1	0.690066850403541	7.59352889737097	3.4977846745046	0.0127657914413224	0.0158191072602532	-4.39489
GPR107	-0.533218	10.1507970259877	-3.45356	0.0134755028771076	0.0166005456418135	-4.45443
PHLDA1	0.677128113216268	4.48078514042418	3.36729979600277	0.0149884648926656	0.0183424500667397	-4.5713
TXNDC15	0.515843862021082	7.59659619678654	3.33163033286116	0.0156678400874918	0.0191177448909557	-4.61989
POR	-0.526035	15.2568322775656	-3.27877	0.0167376801875664	0.0203339042628264	-4.6922
PARD3	0.714534626627201	6.4240144284402	3.19143897474151	0.0186844883066179	0.0225348709294568	-4.81236
IFFO1	-0.879689	4.85692544827841	-3.18284	0.018889304462269	0.022765433412619	-4.82425
ATP6V0D1	0.826556383925447	6.72516987872019	3.13099089993066	0.0201765165972962	0.0242467072653387	-4.89604
RGS5	-0.562478	7.88624541188998	-3.11318	0.0206405867353152	0.024715361575381	-4.92078
WDR78	1.59649520004982	5.48932037548415	3.0823050589601	0.0214727430753579	0.0256749358062344	-4.96373
EXD3	-0.632267	11.375196826661	-2.99648	0.0239837622853274	0.0284732494604457	-5.08362
MYB	-0.821208	4.82928569290444	-2.80675	0.0307377174180023	0.0359540761944094	-5.35098
ARHGEF19	-0.502238	6.86984072389221	-2.76003	0.0326980580668916	0.0381134597173831	-5.41723
UNC5CL	-0.590993	4.67245954094104	-2.74123	0.0335243692631883	0.039022085087926	-5.44392
PDE7A	0.615254635082902	9.78349367773229	2.69958064273129	0.0354355584317346	0.0410747126227472	-5.50313
MIR17HG	-0.570935	7.34191935858936	-2.6586	0.0374299963214034	0.0432962786852294	-5.56148
PLXDC1	0.639022665493671	4.44479497092279	2.64311472922693	0.0382147583783847	0.0441734005371765	-5.58355

## Sheet: Table S2
Table S2: Instrumental variables for EGCG Targets
gene	SNP	chr	effect_allele	other_allele	samplesize	beta	eaf	pos	pval	se
AARS	rs11075762	16	T	C	31568	0.184653311868108	0.10440493715321	70372339	1.0934e-45	0.0130150279374464
AARS	rs117363962	16	T	C	10601	0.317394401983179	0.0147155928685973	69745501	2.6245e-08	0.0570350593870831
AARS	rs5014388	16	G	A	28036	-0.108817	0.217891206828971	70057868	2.0005e-26	0.0102299506826808
AARS	rs77790607	16	C	T	24891	-0.144948	0.0321205086798547	70293562	1.1813e-08	0.025419205886702
AARS	rs8053436	16	G	A	31682	-0.0682573	0.633047694215808	70591857	1.2194e-16	0.00824243785160257
AARS	rs8063629	16	G	A	31568	-0.0509489	0.266711961650247	71285020	1.4997e-08	0.00899917963692543
AARS	rs9788803	16	T	A	31477	0.0516976524136947	0.731705931368836	69691995	9.0841e-09	0.00899527638044521
gene	SNP	chr	effect_allele	other_allele	samplesize	beta	eaf	pos	pval	se
ABCA13	rs34617898	7	G	T	31569	0.0574323753251534	0.80965501623009	49018159	1.4685e-08	0.0101375700007331
ABCA13	rs60189113	7	T	C	31566	-0.0526367	0.342267185081726	48332015	3.4919e-10	0.00838818189928895
ABCA13	rs6583456	7	T	A	31568	0.0808605181504383	0.194164496282037	48624749	9.2215e-16	0.0100612828676138
gene	SNP	chr	effect_allele	other_allele	samplesize	beta	eaf	pos	pval	se
ABCA1	rs10991414	9	C	T	31684	0.0652737131335213	0.130181517531662	107685589	3.2206e-08	0.0118052725771398
ABCA1	rs10991505	9	T	C	31559	0.0816843066463002	0.0851457483763782	107816498	1.0186e-08	0.0142615243114568
ABCA1	rs141366790	9	C	A	27798	-0.266426	0.0253267614311491	107723647	5.6053e-23	0.0269934799235018
ABCA1	rs1809921	9	G	A	31684	0.0601221298078261	0.369235972791161	107814671	2.7975e-13	0.00823151053653885
ABCA1	rs2244278	9	A	C	31567	0.0842295896702911	0.880454476823192	107661129	6.6027e-12	0.0122672787961742
ABCA1	rs2487052	9	T	C	31684	-0.141961	0.769965049419369	107686405	4.0398e-51	0.00943914333334584
ABCA1	rs2853579	9	T	G	26609	0.100431675377347	0.124581908376865	107591272	1.9911e-14	0.0131260930008426
ABCA1	rs328883	9	T	G	31683	-0.0789649	0.433027660853879	107803009	6.9092e-23	0.0080173916281004
ABCA1	rs3890182	9	A	G	31300	-0.0951646	0.111382268827455	107647655	6.8351e-14	0.0127041998187762
ABCA1	rs4351469	9	A	C	30902	0.108323595813793	0.270395322724281	107736145	5.6873e-33	0.00905624818695392
ABCA1	rs56310223	9	A	G	31385	0.0793005099022794	0.0846826301786393	107695882	3.1805e-08	0.0143364265651154
ABCA1	rs59179413	9	G	A	31237	-0.147678	0.0392745202966134	107891888	7.4888e-13	0.0205965862240647
ABCA1	rs73506128	9	C	T	28421	-0.141515	0.0295339672749079	107673640	1.1152e-08	0.0247750340803236
ABCA1	rs75932292	9	T	C	30876	0.107587623633458	0.0615867602030929	107819929	1.2998e-10	0.0167391631997041
ABCA1	rs75947027	9	C	T	26197	0.121575212206331	0.0476990815263706	108530244	3.011e-09	0.0204982654200524
ABCA1	rs76125870	9	G	A	25122	0.184614488286838	0.0426248316456328	107973934	6.3038e-17	0.0220843935985212
ABCA1	rs7864842	9	G	A	31555	0.100838116902294	0.530910120845921	107785968	1.2418e-36	0.00797650012278963
ABCA1	rs79813326	9	A	G	26858	0.240014689077497	0.0264426387549924	107677276	4.4489e-19	0.0268914982216281
ABCA1	rs9695887	9	A	G	31569	0.133176762677642	0.172963689892051	107867295	1.0312e-36	0.01052240055921
ABCA1	rs9775637	9	C	T	31564	-0.0763948	0.645305598550342	107848594	4.1847e-20	0.00831915280720852
gene	SNP	chr	effect_allele	other_allele	samplesize	beta	eaf	pos	pval	se
ABCB4	rs111778381	7	A	G	30159	-0.108751	0.0657590495933663	86677653	3.5871e-11	0.01642741844496
ABCB4	rs17608771	7	G	A	29131	0.0781343350525819	0.0957141669437978	86551401	2.883e-08	0.0140820645314196
ABCB4	rs181464057	7	C	A	13739	-0.307915	0.0115997229916898	87114251	4.6186e-08	0.0563400466319055
ABCB4	rs2178658	7	T	G	31684	0.0902116796395752	0.245048667743996	87122022	1.5539e-22	0.00923590270177376
ABCB4	rs2235015	7	A	C	31681	-0.0776567	0.178681500413441	87199564	6.9612e-14	0.0103702676059002
ABCB4	rs2373593	7	G	T	31300	-0.079861	0.106177311725453	87036942	7.4794e-10	0.0129739220282598
ABCB4	rs28381749	7	T	C	25392	-0.204593	0.0176453216518187	87289252	1.2759e-09	0.033704477496365
ABCB4	rs45493392	7	G	A	31569	-0.233915	0.167339775043406	87079880	1.079e-106	0.0106615682022973
ABCB4	rs73198343	7	T	C	28307	-0.229785	0.026708849862259	87125565	1.1926e-18	0.0260668827859806
ABCB4	rs76331237	7	G	A	20956	-0.355073	0.0146086518481204	87089058	2.743e-18	0.0407118994556309
ABCB4	rs7792365	7	G	A	31684	-0.0667171	0.783719794054643	86864716	4.6919e-12	0.00964886443759185
gene	SNP	chr	effect_allele	other_allele	samplesize	beta	eaf	pos	pval	se
ABCC3	rs1105343	17	C	A	31002	-0.134677	0.0307015852200409	48953618	7.2426e-09	0.0232798938081185
ABCC3	rs11079922	17	C	T	31565	0.329789885004555	0.165439788599472	48752405	1e-200	0.0107110805273389
ABCC3	rs112819464	17	T	C	15486	0.360997512077442	0.0154163865142638	48552568	4.9965e-15	0.0461209004596077
ABCC3	rs113287138	17	G	T	10416	0.415624104590902	0.0164763152967609	48810942	2.2338e-14	0.0544267069025852
ABCC3	rs113400824	17	A	G	29138	-0.343819	0.027573453019158	48782617	4.5285e-42	0.0252977066010801
ABCC3	rs11568581	17	A	G	29498	-0.454008	0.045264709495148	48738491	2.6536e-116	0.019804658578832
ABCC3	rs11653728	17	A	T	31556	0.0880111504367795	0.653355235829463	48936239	6.8261e-26	0.00836425025296556
ABCC3	rs116972558	17	T	C	25136	-0.37873	0.0428941727730422	48690070	2.4024e-66	0.0220119131073945
ABCC3	rs117355256	17	T	G	27741	-0.338857	0.0551927997882291	48656433	3.163e-74	0.0185913589578596
ABCC3	rs117601101	17	T	G	24764	0.430881358417543	0.0170145766671746	48693857	2.5744e-35	0.0347448540409105
ABCC3	rs12451964	17	G	A	30902	-0.288587	0.138208076818833	48730667	2.4075e-135	0.01165530885565
ABCC3	rs12601390	17	T	G	26418	0.459618095386333	0.0235908728857237	48702094	7.3727e-58	0.0286646810516414
ABCC3	rs12602060	17	A	G	31565	-0.13636	0.223574933937335	48873792	3.1419e-46	0.00955258203426561
ABCC3	rs12938101	17	T	A	27526	-0.0534188	0.342323281813728	48375832	2.7277e-09	0.00898232980090296
ABCC3	rs138720857	17	G	T	26055	-0.27298	0.0222116301239275	48717141	4.1692e-20	0.0297253388047298
ABCC3	rs139941293	17	T	C	12088	-0.297311	0.0191073720233851	48872317	2.4708e-10	0.0469782204450961
ABCC3	rs141032183	17	A	G	18247	-0.416308	0.015411478894625	48704511	1.1644e-22	0.042495184984996
ABCC3	rs141252368	17	T	C	26487	0.225896365710287	0.0187044647861013	48708077	1.8707e-12	0.0320697860148904
ABCC3	rs141274954	17	C	T	30077	-0.18497	0.0902527797776178	48495321	1.2331e-38	0.0142290885519518
ABCC3	rs142932106	17	A	G	16142	-0.331952	0.0161290322580645	48397785	5.7523e-14	0.0441807518937336
ABCC3	rs144778037	17	A	G	15203	0.280759356054558	0.0186611374407583	48911158	3.4725e-11	0.0423781310553135
ABCC3	rs145058193	17	C	T	21844	0.471198628615187	0.0168465621086529	48500825	8.1359e-37	0.0371751409152738
ABCC3	rs149570333	17	A	G	20900	0.40440681878029	0.0144075829383886	48812324	6.6793e-23	0.0410456954286472
ABCC3	rs150333964	17	T	G	29655	0.140005532011116	0.0297396257119609	48881532	6.9636e-09	0.0241726431760072
ABCC3	rs183428517	17	T	G	13523	-0.219612	0.0365673297345264	49022190	1.2084e-11	0.0323959835348262
ABCC3	rs192432846	17	C	T	13311	0.32639377258212	0.0182180151754188	48825696	1.0622e-12	0.0458270183202224
ABCC3	rs198551	17	A	G	31679	-0.061644	0.452150052623666	48655493	1.138e-14	0.00798228381293188
ABCC3	rs198556	17	T	G	28917	0.159048432278476	0.0492198641053603	48660014	1.2932e-16	0.0192219803824463
ABCC3	rs1989983	17	A	G	27639	0.281926362640857	0.124822726466938	48710531	2.1794e-106	0.0128685315380021
ABCC3	rs2189595	17	G	A	31017	0.411747839652944	0.3792691388482	48708949	1e-200	0.00827484152922976
ABCC3	rs2240802	17	A	G	31684	0.357776115459968	0.703408621143222	48755002	1e-200	0.00869724881820777
ABCC3	rs2412325	17	C	G	31476	-0.0751953	0.224309685239195	48546232	3.5464e-15	0.00955491958678146
ABCC3	rs2526535	17	A	G	31684	-0.108607	0.310985005073471	48395338	1.0418e-36	0.00858185038156326
ABCC3	rs34817726	17	A	G	27070	-0.0778057	0.741122982496022	48995876	2.195e-15	0.00981180674045785
ABCC3	rs34958340	17	T	C	12201	-0.487614	0.0130507998877351	48709115	5.39e-18	0.0564054831556097
ABCC3	rs4148408	17	A	G	31296	-0.113935	0.0499599557606499	48716819	5.2917e-10	0.018346727369662
ABCC3	rs4257246	17	A	G	22724	0.198458259242486	0.0316448523995694	48990275	1.3017e-13	0.0267962327836794
ABCC3	rs4793661	17	A	G	31569	0.149567952596555	0.152185400468031	48620517	1.5765e-41	0.0110794358793265
ABCC3	rs4794168	17	G	A	27070	0.143266329120554	0.638531484428279	48675785	1.0041e-57	0.00894570306276912
ABCC3	rs55768061	17	T	C	27225	-0.127781	0.0507674943566591	48691210	5.9257e-11	0.0195218913981822
ABCC3	rs55870403	17	A	G	27069	-0.278572	0.0545830681094844	48979170	4.5077e-49	0.0189194382047061
ABCC3	rs56994118	17	C	T	31684	-0.0772149	0.17402006839791	48595109	1.714e-13	0.0104780528474128
ABCC3	rs59410697	17	G	T	26065	0.0750037241187422	0.116341114816579	49015976	4.0057e-08	0.0136598900194402
ABCC3	rs61479331	17	G	T	31354	0.254972893054351	0.219414741809049	48740116	7.301e-154	0.00964929204716739
ABCC3	rs62059698	17	G	A	31684	-0.0728236	0.185294449246496	48617493	1.0576e-12	0.0102242970198271
ABCC3	rs62059722	17	A	G	24094	-0.245037	0.0330984804669015	48694211	6.4063e-22	0.0254645144614886
ABCC3	rs62061895	17	T	C	25503	0.280502118814117	0.0331897395731349	48890794	7.5878e-30	0.0247181986970494
ABCC3	rs7213655	17	G	C	31231	0.0620546000070322	0.230214864658205	48405448	6.6299e-11	0.00950474819370056
ABCC3	rs72837520	17	A	G	30077	0.399981717594704	0.0574554035677146	48710970	2.363e-115	0.0175206958484874
ABCC3	rs72842223	17	A	G	26617	-0.252914	0.0322161359205273	49019937	6.7732e-25	0.0245459325799078
ABCC3	rs73344347	17	C	G	31226	0.424538479960619	0.085369584337119	48718344	3.8418e-193	0.0143203100584101
ABCC3	rs739923	17	A	G	31684	-0.411092	0.263839302491638	48735774	1e-200	0.00901382124160851
ABCC3	rs74710086	17	A	G	21218	-0.464724	0.0162918912222016	48816773	8.3164e-34	0.0383454556810297
ABCC3	rs74869391	17	A	G	24323	0.221981305274614	0.0154041978387365	48581631	1.6437e-09	0.0368152622519926
ABCC3	rs76521597	17	A	G	28824	-0.278181	0.0431386584698303	48753996	6.0322e-42	0.0204998203698616
ABCC3	rs77449141	17	A	G	29836	0.129894159211944	0.076329712047171	48382615	3.6075e-17	0.0154173383672725
ABCC3	rs77651559	17	A	G	12547	0.393122349985002	0.0158205148641109	48614385	7.8115e-15	0.050590339349737
ABCC3	rs78056364	17	A	G	20341	0.374910816947729	0.0163435084501507	48747883	8.9983e-22	0.0391024955358033
ABCC3	rs78629387	17	G	A	19946	-0.277464	0.0192018449814499	48854266	2.8446e-14	0.0364834411877603
ABCC3	rs80063067	17	C	T	28588	0.292810425243121	0.0731510228384298	48903614	2.9399e-74	0.0160612161354141
ABCC3	rs8065514	17	A	G	31355	0.0834778466500182	0.104509132420091	49006788	1.6055e-10	0.013053407554224
ABCC3	rs879778	17	T	C	28135	-0.0784506	0.257718993928881	48987140	3.9724e-16	0.00963838244672609
ABCC3	rs887377	17	T	C	28588	0.104857457990361	0.143792795474844	48987851	1.4002e-18	0.0119188708273121
ABCC3	rs9898731	17	T	C	27386	0.0812497563327821	0.448478329075344	48692374	3.169e-21	0.00859149374355315
gene	SNP	chr	effect_allele	other_allele	samplesize	beta	eaf	pos	pval	se
ABCC6	rs111750393	16	G	C	23789	0.249194987228264	0.0297905311531474	16300741	2.4466e-20	0.0269665278520777
ABCC6	rs12596089	16	T	C	18779	0.0818647503504757	0.298234092235844	16671817	3.9286e-13	0.0112790882394119
ABCC6	rs150529	16	A	G	20476	-0.250175	0.0178884488020258	16227531	1.9383e-11	0.037281698592146
ABCC6	rs17501331	16	G	A	29852	-0.100907	0.0853726584296532	16089441	5.5792e-12	0.0146459245723186
ABCC6	rs2007413	16	T	C	26997	-0.268938	0.139880952380952	16308675	3.4266e-104	0.0124070541001263
ABCC6	rs2283513	16	A	G	30589	0.0492594860723523	0.567197119293762	16211729	1.574e-09	0.00816000233113327
ABCC6	rs2644990	16	C	T	20692	-0.0572305	0.418777042504454	16226194	9.2466e-09	0.00996370715335436
ABCC6	rs58390147	16	T	C	24794	-0.130092	0.829273162939297	16647347	1.1475e-27	0.0119347135838277
ABCC6	rs8062992	16	G	A	20810	0.0747566346167969	0.366237703396647	16291099	2.021e-13	0.0101742929142573
gene	SNP	chr	effect_allele	other_allele	samplesize	beta	eaf	pos	pval	se
ABCD3	rs11165186	1	C	A	31196	-0.102208	0.152670004969229	95088721	4.2159e-20	0.0111309542114995
ABCD3	rs113052371	1	A	C	25313	0.181422095379533	0.0216983923463852	95011853	2.7277e-09	0.0305044381375951
ABCD3	rs114038810	1	T	C	29794	0.183693468486744	0.0305747404984046	94839766	1.1651e-14	0.0237947989594094
ABCD3	rs115260418	1	C	T	28191	-0.199355	0.0268181032993609	94896412	2.0508e-14	0.0260686607898463
ABCD3	rs11585025	1	A	C	31644	-0.121017	0.154195948739148	94788622	4.0481e-28	0.0110069742890275
ABCD3	rs115978267	1	A	G	29093	0.183458868148434	0.0627857677279907	94884418	6.987e-27	0.0170899466365252
ABCD3	rs12026367	1	C	T	31199	0.126669941801674	0.0536232991897263	94839743	1.0184e-12	0.0177707550226816
ABCD3	rs12044205	1	G	T	31528	0.0952888056187569	0.0754538934812969	95085099	2.619e-10	0.015077581230519
ABCD3	rs140930519	1	T	C	31024	0.179114878926723	0.0367847935665089	94808160	4.5337e-17	0.0213275161552604
ABCD3	rs141419618	1	G	A	23940	0.240076695162503	0.0172705633430309	94897217	7.712e-12	0.0350794434616007
ABCD3	rs181179430	1	G	A	29040	-0.208097	0.0213853536407261	94832068	4.0107e-13	0.0286828711719938
ABCD3	rs1931565	1	A	G	31644	-0.124954	0.355030252921944	94596867	3.8725e-51	0.00830686134166758
ABCD3	rs2985285	1	T	A	31522	0.10689212446319	0.708102087816665	95024083	3.0328e-34	0.00876021344559827
ABCD3	rs2997382	1	A	G	31527	0.057747185479173	0.462592480748905	95217389	4.8299e-13	0.00798716258356474
ABCD3	rs34579537	1	A	G	30367	0.198778686607916	0.0407389862624349	94944887	3.5264e-22	0.0205262942976545
ABCD3	rs3761910	1	G	A	30976	-0.0781772	0.140222042326819	94588417	1.4146e-11	0.0115710038156048
ABCD3	rs3789431	1	T	C	31518	0.0752607367473791	0.609523090284333	94573046	3.0213e-20	0.00816418649086382
ABCD3	rs45477495	1	C	T	24758	-0.191885	0.0247426862039244	94638276	3.2893e-11	0.0289297174001789
ABCD3	rs55834021	1	T	G	28266	-0.225884	0.0470441119399767	94880607	5.7784e-30	0.0198638665385628
ABCD3	rs560426	1	C	T	31644	-0.0445969	0.468225036641738	94553438	2.1634e-08	0.00796614220707781
ABCD3	rs587552	1	G	T	31635	0.146822710124185	0.289887218045113	94988142	5.1365e-63	0.00876239616401202
ABCD3	rs61772818	1	A	G	29732	-0.175634	0.0317245009515326	94827884	6.0683e-14	0.0233978562899855
ABCD3	rs61772855	1	T	C	29103	-0.154481	0.0297698188466013	94930036	2.3858e-10	0.0243888114660783
ABCD3	rs6660609	1	A	G	30862	-0.0987414	0.0776900143260928	95118315	5.1408e-11	0.0150366784461019
ABCD3	rs6681849	1	T	G	31644	0.303961086340702	0.437934533428539	94874521	1e-200	0.00801200600821077
ABCD3	rs6697764	1	A	G	25650	0.132282517749168	0.378454651615415	94738846	7.6862e-48	0.00910328172628521
ABCD3	rs72725182	1	C	G	29624	-0.117665	0.0431087071454716	94534980	5.9913e-09	0.020227832657276
ABCD3	rs72727446	1	A	G	29487	0.201523692145557	0.0471536070669066	94710008	3.2765e-25	0.019426779018225
ABCD3	rs72727470	1	G	A	31019	0.163960163156201	0.0463362068965517	94807726	9.1153e-18	0.0190991139068577
ABCD3	rs72727492	1	G	A	30862	-0.18051	0.0997405815619313	94917600	3.6014e-41	0.0134323866309584
ABCD3	rs7519356	1	T	C	31524	-0.0782613	0.268941824908453	95061215	2.9437e-18	0.00898171354684992
ABCD3	rs76816991	1	T	G	29562	-0.185119	0.0326782729237167	95061336	1.2142e-15	0.0231314616785332
ABCD3	rs841688	1	A	T	31642	0.0685237269906653	0.271338369601984	95059032	1.7911e-14	0.00893993750612079
ABCD3	rs947386	1	T	C	31644	0.0597361087623567	0.202675786388064	95117157	1.5316e-09	0.00988828338586627
ABCD3	rs9803636	1	A	G	29620	-0.119066	0.044864754931869	95194033	1.9854e-09	0.0198475721616389
gene	SNP	chr	effect_allele	other_allele	samplesize	beta	eaf	pos	pval	se
ABCG1	rs12482369	21	A	G	28588	-0.0972857	0.0638370263258623	43639801	1.2929e-08	0.0171072838386729
ABCG1	rs144043692	21	A	G	29050	0.227960714925169	0.0240458811261731	43618909	3.8493e-17	0.0270817600148701
ABCG1	rs225386	21	A	G	31682	0.0574593395454145	0.509809448641335	43682938	4.8157e-13	0.00794680029671731
ABCG1	rs225411	21	C	A	31355	-0.0815055	0.374162861491629	43643047	5.2482e-23	0.00825221614616648
ABCG1	rs2839471	21	T	C	31684	-0.0481127	0.585027622233079	43554456	2.4077e-09	0.00806245343320385
ABCG1	rs55934878	21	A	G	31567	-0.0746723	0.105862147063264	43721844	7.8058e-09	0.0129358734294843
ABCG1	rs72542415	21	A	C	31099	-0.202332	0.0448432216415616	43639168	1.5708e-25	0.0193743015984501
ABCG1	rs915845	21	G	T	31569	0.121692029659958	0.142503963161471	43635438	1.146e-26	0.0113847908747271
gene	SNP	chr	effect_allele	other_allele	samplesize	beta	eaf	pos	pval	se
ABCG2	rs111620587	4	A	G	31232	-0.11528	0.138050999732385	89072808	2.8221e-23	0.0115991066330082
ABCG2	rs112791442	4	A	G	31564	0.0843055992425669	0.16168975801276	89046575	6.2697e-15	0.0108104890995149
ABCG2	rs114075855	4	C	T	27455	-0.160579	0.0233243967828418	89033341	1.3517e-08	0.0282744325730913
ABCG2	rs114086764	4	A	G	31239	0.124902388909423	0.0599487845895123	89118728	1.2497e-13	0.0168527388765176
ABCG2	rs11932727	4	T	C	31684	-0.228327	0.370213085798038	89165737	1.5854e-169	0.00822701522092852
ABCG2	rs11947810	4	C	T	30902	0.172701416849216	0.09619777751965	89173505	9.9002e-37	0.0136418253867956
ABCG2	rs12641788	4	C	T	31684	0.11035958987175	0.908019842910293	89222164	9.8591e-16	0.0137458074722554
ABCG2	rs1351441	4	C	T	31684	0.143228828523587	0.102634446991619	89167407	7.2741e-28	0.0130898216526766
ABCG2	rs143891741	4	A	C	21456	-0.237632	0.0174897747390269	89152105	1.0966e-10	0.0368256121201414
ABCG2	rs151297142	4	T	G	28187	-0.19739	0.0220015576323988	89105962	6.199e-12	0.0287120881497426
ABCG2	rs187975720	4	T	C	10607	-0.284767	0.01852856109906	89150287	2.2267e-08	0.0509130409808642
ABCG2	rs2728125	4	G	A	31684	0.0794676635308608	0.0952685181705438	89001893	4.285e-09	0.0135310171174631
ABCG2	rs28789746	4	C	T	31566	-0.0771022	0.423823185232721	89230502	1.0345e-21	0.00805387678917064
ABCG2	rs36111742	4	G	A	31684	0.412268571491317	0.129505054680747	89152718	1e-200	0.0118314647250637
ABCG2	rs6532064	4	T	C	27310	0.086043023884844	0.11212053069485	89236855	2.23e-10	0.0135614014665538
ABCG2	rs72657985	4	C	T	29384	0.174155735871099	0.0671767658069028	88882406	4.1667e-26	0.0164786003700679
ABCG2	rs72659633	4	T	C	27910	0.237010348066791	0.0354280709437267	88979694	4.1241e-25	0.0228962322433262
ABCG2	rs75188535	4	A	G	19963	-0.232211	0.0147770016120365	89140175	2.1609e-08	0.0414774136493586
ABCG2	rs7696304	4	G	A	31231	-0.0492306	0.383793393485242	88959998	2.1826e-09	0.0082277319527848
ABCG2	rs78135941	4	A	G	29716	-0.160316	0.0283876466052514	88995570	8.5382e-11	0.0246989572429387
gene	SNP	chr	effect_allele	other_allele	samplesize	beta	eaf	pos	pval	se
ABHD14A	rs114270966	3	T	C	25213	-0.292455	0.0278329526268746	51974725	3.3386e-27	0.0270721440352248
ABHD14A	rs13099450	3	G	A	27979	0.054393687963118	0.309050820817324	52013883	2.7511e-09	0.00914810002911552
ABHD14A	rs6798914	3	G	C	25494	-0.222834	0.0203786767877167	51852154	1.1638e-12	0.0313436021347999
ABHD14A	rs78417298	3	T	C	25729	-0.164954	0.0244438751547756	52723309	7.5414e-09	0.0285471258921669
gene	SNP	chr	effect_allele	other_allele	samplesize	beta	eaf	pos	pval	se
ABHD3	rs116826070	18	A	G	28802	-0.158747	0.196084629325241	19159352	1.0683e-51	0.0104941371841697
ABHD3	rs2305684	18	G	A	20324	0.41035108390353	0.0139353400222965	19243664	3.0747e-22	0.0423125234740341
ABHD3	rs35996865	18	G	T	27331	0.0930677771822168	0.158743709561467	18692344	1.8442e-15	0.0117042830602919
ABHD3	rs72881368	18	A	G	20326	0.480401656411479	0.0139007278211265	18957311	8.2955e-30	0.042362341067827
ABHD3	rs78252878	18	T	G	25345	-0.154657	0.0460039467192896	19360432	2.991e-13	0.0212015698718504
ABHD3	rs8090799	18	C	T	31300	0.132580407215136	0.830505243088656	19128102	1.4777e-35	0.0106527935346738
gene	SNP	chr	effect_allele	other_allele	samplesize	beta	eaf	pos	pval	se
ABHD4	rs117182615	14	C	A	28613	0.197369881220225	0.0359631234599371	23031439	1.4797e-18	0.0224505910639183
ABHD4	rs117685794	14	T	C	29824	-0.180666	0.0707099276738454	23037690	1.1603e-29	0.0159729896971063
ABHD4	rs1242926	14	C	T	30280	-0.117974	0.455723070819282	23075116	2.1933e-47	0.00815918154141754
ABHD4	rs1263662	14	T	C	29804	-0.0554109	0.436997048000324	23020360	1.9409e-11	0.00825758660404056
ABHD4	rs4981428	14	A	T	31683	-0.0581094	0.555208959711365	23039328	3.6162e-13	0.00799402689988406
ABHD4	rs78146195	14	A	G	28925	0.244758680384425	0.0313626834381551	23077108	1.0605e-24	0.0238539944043218
gene	SNP	chr	effect_allele	other_allele	samplesize	beta	eaf	pos	pval	se
ABHD5	rs149876612	3	T	G	31562	-0.210343	0.93785630686752	43706042	2.7989e-37	0.0164867883656076
ABHD5	rs2372362	3	A	G	31569	-0.107408	0.166547142749302	43224104	8.7144e-24	0.0106818254390714
ABHD5	rs2372363	3	T	C	30402	-0.167803	0.0219331148576618	43224482	1.3578e-09	0.0276885039520667
ABHD5	rs2372548	3	A	G	31355	-0.0731119	0.652473363774734	43801895	2.8216e-18	0.0083860250962186
ABHD5	rs4336089	3	A	G	31236	-0.123685	0.0332364970757999	43695204	2.9972e-08	0.0223197614696164
ABHD5	rs4542996	3	G	T	31184	-0.157572	0.0511317936343789	43871094	4.3978e-18	0.0181790268063359
ABHD5	rs55659203	3	G	A	31568	-0.373011	0.0524478164043332	43714796	6.0461e-97	0.0178523829390523
ABHD5	rs55850051	3	C	T	31172	-0.0965691	0.487853009924512	43527526	1.8793e-33	0.00801236751750803
ABHD5	rs62246178	3	A	C	30902	0.0732184666545039	0.138324234328416	43248936	3.2997e-10	0.0116511993021393
ABHD5	rs74544561	3	C	T	28673	-0.100045	0.075875074158827	43975785	2.2358e-10	0.015770066633356
gene	SNP	chr	effect_allele	other_allele	samplesize	beta	eaf	pos	pval	se
ABL2	rs11582386	1	C	T	31352	0.0649665057579171	0.131440866709448	179231878	3.8718e-08	0.0118191834660646
ABL2	rs148258229	1	G	A	8400	0.441215420956833	0.0158928571428571	179463503	8.5647e-13	0.0616911942053738
ABL2	rs34535070	1	G	A	31465	-0.115813	0.910051120132311	179158781	9.3944e-17	0.0139328627867905
ABL2	rs4652355	1	G	C	31349	-0.0815504	0.406183932346723	179053051	1.1389e-23	0.00813178362201216
ABL2	rs7540303	1	C	T	31355	0.0557083825612306	0.381614705216275	179629191	1.2287e-11	0.00822033415886771
gene	SNP	chr	effect_allele	other_allele	samplesize	beta	eaf	pos	pval	se
ABTB2	rs10836257	11	A	C	31355	0.0520377638244989	0.606963470319635	34583335	1.958e-10	0.00817586787086773
ABTB2	rs11604215	11	G	A	31563	0.0719248843009651	0.26461038961039	34555274	1.5689e-15	0.00902264091286129
ABTB2	rs1267467	11	A	G	31560	0.0660124270448224	0.227525014158958	34345696	3.5811e-12	0.00949422932083337
ABTB2	rs148687918	11	T	C	28265	0.160096532580828	0.061880120741699	34345618	4.6778e-20	0.0174564432768698
ABTB2	rs17268652	11	G	T	27069	0.149350947421488	0.0556288078566882	34474518	1.6549e-15	0.0187511390502691
ABTB2	rs17342773	11	T	C	23247	0.255851358478799	0.0212689852520361	34343712	1.726e-15	0.032143745725765
ABTB2	rs208664	11	A	G	31569	-0.102937	0.114856193855213	34439132	1.6215e-16	0.0124816057914299
ABTB2	rs208681	11	T	C	31569	-0.107135	0.182588510606175	34454974	2.4741e-25	0.0103014295710888
ABTB2	rs2266630	11	C	A	26317	0.167508260255951	0.0276574710479239	34457911	2.9383e-10	0.0265797528214327
ABTB2	rs2602540	11	G	A	26701	-0.0840052	0.211990196985111	34530875	2.1152e-15	0.0105876003457323
ABTB2	rs2755171	11	G	T	31684	-0.0908333	0.254707054004284	34349623	2.2262e-23	0.00911760992691593
ABTB2	rs34329347	11	G	A	31569	0.248741684810398	0.360628821619989	34444168	6.8024e-198	0.0082879638019751
ABTB2	rs4237663	11	A	G	28802	0.076671140138624	0.0989800649049606	34094371	3.8983e-08	0.013951876139794
ABTB2	rs72929321	11	T	C	31355	-0.0621206	0.160749619482496	34574024	1.1048e-08	0.0108720351897606
ABTB2	rs7944397	11	G	A	31684	-0.108511	0.132887368935323	34455309	1.82e-20	0.0117026816813775
gene	SNP	chr	effect_allele	other_allele	samplesize	beta	eaf	pos	pval	se
ACADVL	rs11656323	17	C	T	28588	0.26828408861113	0.0380853145068685	7145117	1.1831e-34	0.0218497294977547
ACADVL	rs11867639	17	G	A	30817	0.31398668970405	0.395967679278999	7103074	1e-200	0.00823625653364942
ACADVL	rs138079226	17	T	C	24977	-0.171452	0.0262787659531705	7086436	8.7879e-10	0.0279701671260747
ACADVL	rs141804853	17	T	C	31154	0.248148284179177	0.0312703707964262	7116149	4.251e-27	0.0230176131807636
ACADVL	rs143545826	17	A	G	27309	-0.111821	0.0661599352343258	7086467	8.2593e-11	0.0172146547232893
ACADVL	rs149405554	17	A	G	20121	-0.163106	0.0364548717267048	7220033	8.6563e-10	0.0265978421603425
ACADVL	rs150566854	17	T	C	28724	-0.237674	0.0392405598545393	7104925	1.9392e-28	0.0214875853858544
ACADVL	rs188937613	17	A	G	24715	-0.194392	0.0201883910386965	7160390	1.2124e-09	0.031980301240805
ACADVL	rs190193197	17	C	A	16080	-0.253735	0.0158109950022717	7133920	1.3772e-08	0.0447016058384202
ACADVL	rs222856	17	A	G	18857	-0.278904	0.0212596139892614	7110413	5.5754e-15	0.0356974554027901
ACADVL	rs34870220	17	T	C	26945	0.225277857784324	0.0544124371284865	7084911	1.8558e-32	0.018990917334125
ACADVL	rs35192659	17	G	A	19704	0.239465310119289	0.0278556292296124	7098434	5.1743e-15	0.0306115931991881
ACADVL	rs4465647	17	G	A	21238	0.0904360440114182	0.294809131968075	7244477	1.9255e-17	0.0106415377025579
ACADVL	rs4467109	17	T	G	31684	-0.113392	0.891653200045098	7208332	7.1844e-19	0.0127808273776462
ACADVL	rs5412	17	A	G	31300	-0.228918	0.170066730219256	7184046	1.0562e-102	0.0106385285928227
ACADVL	rs62059223	17	G	C	30124	-0.111494	0.0962713082358577	7245506	6.893e-16	0.0138121475995492
ACADVL	rs72837690	17	C	T	30902	-0.0726844	0.642951175126805	7088423	4.8096e-18	0.00839535194002529
ACADVL	rs77234976	17	G	C	31151	-0.145863	0.145497775732474	7141140	1.0096e-37	0.0113622471016453
ACADVL	rs77680021	17	A	G	27310	-0.153776	0.0765234989880818	7124506	1.2502e-21	0.0160958463591569
ACADVL	rs77934771	17	A	G	28267	0.238923344141729	0.0386340117281821	7131117	6.7781e-28	0.0218230708373732
ACADVL	rs79385421	17	T	C	24262	0.19625755234072	0.0193620680669203	7224433	2.5691e-09	0.0329451498784173
ACADVL	rs8610	17	A	G	27398	-0.0680325	0.438225148949514	7219230	2.749e-15	0.00860985378518646
gene	SNP	chr	effect_allele	other_allele	samplesize	beta	eaf	pos	pval	se
ACAT1	rs10890795	11	T	C	14263	-0.169611	0.420835055808185	107880880	2.0689e-45	0.0119928519602471
ACAT1	rs11212423	11	C	G	13925	-0.0711069	0.667437681602692	107749247	2.2603e-08	0.0127187818858231
ACAT1	rs112427329	11	T	G	10155	-0.361017	0.0155809103177524	107971033	1.8658e-10	0.0566576570065495
ACAT1	rs117030500	11	T	C	14263	0.239621118408711	0.0253656307129799	107977636	1.9759e-10	0.037656145835357
ACAT1	rs117338998	11	G	T	10657	-0.270178	0.0201415809876959	108188590	3.0006e-08	0.0487572358494321
ACAT1	rs118096972	11	A	C	10979	-0.37903	0.0212038991056175	107906024	5.8886e-16	0.0468435316074875
ACAT1	rs12790434	11	C	T	10179	-0.19386	0.132919704723518	108314016	5.9773e-21	0.0206446774857974
ACAT1	rs138237074	11	A	C	2356	0.718544223377817	0.0276020701552616	108173409	6.4449e-16	0.0889210369618742
ACAT1	rs143531724	11	C	T	11496	-0.258862	0.035586265446656	108236786	3.5473e-13	0.0355990758854526
ACAT1	rs143634957	11	C	T	11302	0.315040531000337	0.0222600943890928	108295037	2.7963e-12	0.0450850109478565
ACAT1	rs149821600	11	G	A	9825	-0.311181	0.0173440643863179	108011847	1.2352e-08	0.0546440076167435
ACAT1	rs2852195	11	A	C	13925	-0.146703	0.606342200023231	108433169	5.6736e-33	0.0122650429154334
ACAT1	rs34052882	11	T	G	11496	-0.268167	0.920765620926393	108040484	4.6032e-28	0.0244163222071329
ACAT1	rs4550189	11	G	A	14260	0.391155689812467	0.39560625422837	107986344	1e-200	0.0121097083623562
ACAT1	rs4754335	11	T	A	13662	-0.091351	0.633560195332026	108502548	3.4437e-13	0.0125554591149969
ACAT1	rs55764268	11	T	C	11496	0.0884896544211937	0.337111385191171	107498363	2.2563e-10	0.0139509773796203
ACAT1	rs57630641	11	C	T	13015	0.0724846758332936	0.557852068868644	107842814	6.3224e-09	0.012480143910691
ACAT1	rs611018	11	A	G	11489	0.472436844740252	0.0720148775169937	108185949	1.6161e-76	0.0255189186494097
ACAT1	rs73000548	11	T	G	14262	0.211863879396077	0.0523021001615509	107978149	1.6363e-15	0.0265950164312262
ACAT1	rs77634556	11	C	G	13925	0.268069384611335	0.149286605332918	107981222	3.2073e-57	0.016814553658498
gene	SNP	chr	effect_allele	other_allele	samplesize	beta	eaf	pos	pval	se
ACER3	rs111444211	11	A	C	17520	-0.147525	0.0544395339493773	76768240	3.7139e-10	0.0235459435741526
ACER3	rs11236872	11	A	G	31351	0.0662620525368571	0.145170497792663	76408472	5.0718e-09	0.0113365359344495
ACER3	rs116873354	11	C	A	22149	0.843665937826798	0.0204697200421694	76714733	1.6688e-139	0.0335539038891327
ACER3	rs117059066	11	T	C	28000	0.267257378378053	0.0265866957470011	76989287	2.5852e-24	0.0262678885405436
ACER3	rs117556921	11	C	T	23394	-0.208469	0.0905617118838365	76608217	2.6417e-38	0.0161091946979468
ACER3	rs117772061	11	A	G	23547	0.635336893757089	0.0165656128194023	76772909	2.5518e-69	0.0361027897350318
ACER3	rs12362168	11	G	A	18546	0.113572028778844	0.265830302130503	76795839	4.3299e-22	0.0117532887073211
ACER3	rs12418112	11	G	A	14636	0.210808501298844	0.0285012028030541	76534391	1.9538e-09	0.0351253834475546
ACER3	rs12577658	11	A	G	31230	0.0676693803036736	0.184362454597591	76929337	5.4534e-11	0.0103184428879818
ACER3	rs12799100	11	T	C	30628	-0.0830705	0.133702500684851	76770780	2.6113e-12	0.0118719589846038
ACER3	rs141866329	11	A	G	22003	0.243909129786858	0.0150637996219282	76417049	4.5934e-10	0.0391356668036163
ACER3	rs144366780	11	G	A	17212	-0.453009	0.0126884732635742	76609372	5.0856e-21	0.0481545740116006
ACER3	rs149028714	11	T	C	15125	0.655086092426067	0.0132338308457711	76784761	9.4171e-39	0.0503138319835689
ACER3	rs17135325	11	A	C	31684	-0.269214	0.115186591003044	76733313	8.3785e-104	0.0124433749988879
ACER3	rs2233546	11	T	C	28588	0.190993582516284	0.0595202653851061	76813961	3.2525e-27	0.0176760802684156
ACER3	rs2451908	11	T	C	31146	0.417882985224242	0.205151317555905	76532820	1e-200	0.00992212006335415
ACER3	rs4257006	11	G	A	31238	0.260459036874622	0.256105951152391	76755743	1.2901e-177	0.00916596120040618
ACER3	rs618076	11	T	G	30077	0.698593376034433	0.0555155587552996	76596504	1e-200	0.0178058611566638
ACER3	rs61900122	11	T	C	25655	-0.21627	0.0261904761904762	76689230	5.1334e-15	0.0276433254294408
ACER3	rs72939779	11	C	T	13451	0.225892831276703	0.967944126074499	76517246	6.7369e-11	0.034612164635435
ACER3	rs76869208	11	T	C	14094	0.647411864723881	0.0162434859740548	76652857	5.8314e-43	0.0471177386755661
ACER3	rs77964909	11	A	G	31679	0.121662599515798	0.0728837768756578	76499650	1.7148e-15	0.015283286164914
ACER3	rs78036456	11	A	C	18203	0.562559405699012	0.0161106032906764	76567308	1.2965e-41	0.0416278974174198
ACER3	rs78949165	11	A	G	22923	0.473936486980396	0.0179291797400269	76655766	2.4996e-41	0.0351963526776129
ACER3	rs7934977	11	G	T	31567	0.0475970006276571	0.640325381247169	77339149	9.5125e-09	0.00829302725505404
ACER3	rs79819324	11	T	C	31051	0.161783116246405	0.0471589159223899	77410048	1.2721e-17	0.0189301939139048
gene	SNP	chr	effect_allele	other_allele	samplesize	beta	eaf	pos	pval	se
ACLY	rs149576225	17	T	A	26760	-0.180168	0.108308400460299	39962479	2.2536e-38	0.01390924442451
ACLY	rs34200091	17	A	G	31529	-0.196421	0.157431871367102	40014216	3.7026e-72	0.010934050146035
ACLY	rs62074958	17	T	C	30862	0.0598457694006043	0.617512680528129	40050359	4.9816e-13	0.00828211979138991
ACLY	rs7209507	17	A	G	30037	0.0821696614961444	0.108051355891529	40027651	4.0471e-10	0.0131423094694983
ACLY	rs7213095	17	G	T	20507	-0.0673577	0.517560912389839	39940768	9.322e-12	0.00988170666428434
ACLY	rs76162894	17	A	C	11423	-0.347181	0.0153537468376516	40085165	1.1024e-10	0.0538080941347783
gene	SNP	chr	effect_allele	other_allele	samplesize	beta	eaf	pos	pval	se
ACN9	rs12670377	7	A	C	31644	0.0816646668321847	0.258934946822504	96786625	2.2695e-19	0.0090743560011317
ACN9	rs147560909	7	A	C	27444	-0.0904897	0.0847650497567942	97013431	3.5265e-09	0.0153245096892989
ACN9	rs62624461	7	C	T	29856	-0.351416	0.0255831755368438	96747192	7.0854e-42	0.0259190797996013
ACN9	rs77864986	7	T	G	31518	0.0816065249314877	0.119000868481667	96739664	3.2671e-11	0.0123010694640551
gene	SNP	chr	effect_allele	other_allele	samplesize	beta	eaf	pos	pval	se
ACP5	rs10408418	19	G	A	23359	0.186389763266416	0.0240025948751216	11998179	6.9951e-10	0.030227654514355
ACP5	rs111279059	19	A	G	24984	0.170511449558335	0.0386622273020921	12290447	2.0089e-13	0.0232045194140518
ACP5	rs112052371	19	G	T	30686	0.164753454010697	0.106408518877057	11787012	2.5341e-36	0.0130905276631969
ACP5	rs112354959	19	T	C	27753	-0.366688	0.0183251791018696	11770958	4.7852e-31	0.0316462383281021
ACP5	rs113278289	19	C	T	27419	-0.127875	0.0363729053994148	11448611	2.0658e-08	0.0228094964896069
ACP5	rs11557488	19	A	G	23677	-0.131551	0.202540391156463	11558275	1.2449e-30	0.0114343503579127
ACP5	rs11668253	19	G	T	30688	-0.109661	0.106109885004066	12415345	5.9104e-17	0.0131063185751123
ACP5	rs117666149	19	T	C	6352	-0.45061	0.0130977764240024	11714888	7.7136e-09	0.0780358036480373
ACP5	rs118048815	19	A	G	25517	-0.324815	0.0357281177381875	11710508	3.054e-42	0.0238487365096802
ACP5	rs118153418	19	G	A	4553	0.68448114751201	0.0140566659345486	12122378	1.4783e-14	0.0890161972991404
ACP5	rs118159575	19	G	A	16675	-0.328269	0.0299137931034483	11696438	1.7485e-24	0.0321448329577403
ACP5	rs12327597	19	A	G	24984	0.180906525071305	0.0512100581424241	12439524	4.9402e-19	0.0202951070330617
ACP5	rs12972608	19	T	C	27667	0.202112687996507	0.0674603174603175	12438535	8.8106e-33	0.0169490794734045
ACP5	rs12972855	19	G	A	31463	0.319003209348429	0.125986767912187	11704605	2.3091e-155	0.0120133316266953
ACP5	rs137924620	19	A	G	30956	-0.165229	0.0532860701283771	12051405	2.6071e-20	0.0178935435029274
ACP5	rs140164200	19	A	G	25593	0.169774115643336	0.0383706347675092	12534366	1.6044e-13	0.0230102349683305
ACP5	rs141846578	19	C	G	28514	0.197869218759986	0.027818881325836	12325300	7.8115e-15	0.0254631722293697
ACP5	rs144758171	19	A	G	26012	-0.225097	0.0392416434211148	12150460	2.0832e-23	0.0225796627302841
ACP5	rs145025827	19	T	C	24940	0.557421295558242	0.0267692614174013	11887824	8.294e-90	0.027740269407655
ACP5	rs145128974	19	C	A	18439	0.409080942009657	0.0144719399027839	11647870	6.4856e-21	0.0436032085195597
ACP5	rs146400365	19	T	C	28080	-0.136026	0.953335630302769	11921272	1.052e-11	0.0200064869879309
ACP5	rs146559752	19	C	A	20711	0.161211991835266	0.0293375394321767	11264537	3.0805e-08	0.0291164556847396
ACP5	rs148375730	19	A	C	28007	0.197050074473145	0.0236541951093061	12602045	1.3685e-12	0.0278032642153069
ACP5	rs149138791	19	G	A	14484	0.41458610873372	0.0125220825106516	11929656	4.2815e-15	0.052837074967657
ACP5	rs149355912	19	C	T	30326	0.380740696971542	0.0412919693697232	12399422	1.1203e-77	0.0204080474781599
ACP5	rs151248253	19	A	G	30331	0.212648524047237	0.0265606595995289	11311774	3.7201e-17	0.0252503709564972
ACP5	rs166974	19	C	T	15002	0.250035504436242	0.0220162986330179	11827119	2.0816e-10	0.0393434517302747
ACP5	rs17002025	19	A	G	31141	0.0839788356802445	0.111586757990868	12530177	4.1506e-11	0.0127263798994127
ACP5	rs311779	19	G	A	30433	-0.106077	0.0668309088065071	11571090	6.3355e-11	0.0162309433869424
ACP5	rs34651602	19	C	T	27096	0.196941749968255	0.074387227344277	11485137	2.4716e-33	0.016370749201441
ACP5	rs34912772	19	C	T	22469	-0.256824	0.372472739663789	11677145	1.0912e-152	0.00975729835825684
ACP5	rs35909449	19	G	A	25319	-0.40579	0.0182523216755582	11752385	2.3255e-34	0.033197297411854
ACP5	rs389175	19	T	G	26032	0.109753156028238	0.265315762127438	11817075	2.0413e-28	0.00992657314957157
ACP5	rs429740	19	T	C	31352	-0.176375	0.205522630327281	11883639	3.0608e-71	0.0098828405081701
ACP5	rs4804175	19	T	C	31351	0.136221922102903	0.524348810872027	12058536	4.5329e-65	0.00799659067231599
ACP5	rs4804604	19	A	C	29863	-0.424556	0.415306775457963	11680634	1e-200	0.00830366359231462
ACP5	rs4804607	19	A	G	24933	-0.220716	0.030789159027501	11700877	1.6746e-17	0.0259232643554681
ACP5	rs55754226	19	A	G	25633	-0.148287	0.0494174850760639	12121559	3.4133e-13	0.0203774601599299
ACP5	rs55831953	19	A	G	23778	0.18483054621051	0.029973040122641	12593184	6.3042e-12	0.0268930488608005
ACP5	rs56264987	19	A	G	29170	-0.147396	0.0536221152659509	12376745	1.0575e-15	0.0183786042097496
ACP5	rs57239197	19	C	T	30103	-0.131072	0.034288091276444	11993605	4.8453e-09	0.0223967325792421
ACP5	rs62109821	19	T	C	28458	-0.195504	0.091325168453617	12215006	3.71e-41	0.0145506811501015
ACP5	rs62131153	19	T	C	18200	-0.182312	0.0376340055476422	11556131	3.6017e-11	0.0275415863668153
ACP5	rs62131156	19	G	A	27059	0.268617686438626	0.0461302820073881	11583171	2.9631e-39	0.0204923396376792
ACP5	rs625417	19	C	T	31470	0.231783659835446	0.097880416400466	11612313	6.7477e-67	0.0134139496296405
ACP5	rs6511741	19	C	T	31353	-0.419559	0.407500377472444	11769502	1e-200	0.00812713369693754
ACP5	rs7247136	19	A	G	29863	-0.397635	0.366830653547716	11690893	1e-200	0.0084903488461122
ACP5	rs72986630	19	T	C	26160	-0.284173	0.0647682989811728	11849736	1.3237e-57	0.017763366523708
ACP5	rs72992965	19	A	C	15082	-0.213751	0.0501418647881812	11562041	5.4063e-16	0.0263831058510798
ACP5	rs72995003	19	A	G	24623	-0.345203	0.0213035117903046	11649289	1.9306e-28	0.0312079257621317
ACP5	rs74359185	19	G	A	28062	-0.159639	0.0614844187750528	11523844	1.037e-19	0.0175720492769889
ACP5	rs76815782	19	C	T	26162	-0.344017	0.0309375146706727	11710819	2.8286e-42	0.0252482295319421
ACP5	rs77897491	19	T	C	3295	0.740830660976996	0.0174506828528073	11707334	3.4129e-15	0.0940749293295147
ACP5	rs77938068	19	A	G	26471	-0.0902626	0.0977325312355391	12179882	6.9422e-10	0.0146356698810741
ACP5	rs78341426	19	A	G	15724	-0.256856	0.0179359564278336	11656300	1.4904e-09	0.0424884912036002
ACP5	rs78411970	19	C	T	27070	0.476564896484072	0.0162771849250304	11836395	1.0015e-44	0.0339636888511696
ACP5	rs78804843	19	T	C	18162	-0.414324	0.0124802646417563	11694301	1.8447e-18	0.0472626835903766
ACP5	rs80132751	19	A	G	23518	-0.060965	0.246434961774115	11679937	1.2122e-08	0.0106997413143899
ACP5	rs896412	19	G	C	27921	0.0857307079478029	0.456916738941891	11444131	6.0058e-24	0.00849508590616173
gene	SNP	chr	effect_allele	other_allele	samplesize	beta	eaf	pos	pval	se
ACSS1	rs113306130	20	A	G	29836	0.140701758374342	0.039537983118614	25220109	2.1187e-11	0.0210071603174686
ACSS1	rs11698369	20	A	C	18561	0.34382268913203	0.0178703841020317	25145269	1.6939e-18	0.039177161738361
ACSS1	rs117295153	20	T	C	30844	-0.173404	0.029453995110404	25172498	3.294e-13	0.0238132947027477
ACSS1	rs117356716	20	T	G	27086	-0.234463	0.0152650947253646	24834804	2.2195e-11	0.0350431507668383
ACSS1	rs13045280	20	T	A	31568	-0.0858966	0.182425546370739	25104977	7.7237e-17	0.0103051658104886
ACSS1	rs142341850	20	A	G	12546	0.33103645619012	0.0200107080712087	25086065	2.0886e-13	0.0450806809279497
ACSS1	rs2424641	20	T	G	31569	-0.0537607	0.377104250018872	24717867	5.8626e-11	0.00821138078883862
ACSS1	rs3646	20	G	C	30817	-0.294492	0.234364074275503	25038839	1e-200	0.00950896286899073
ACSS1	rs4813543	20	G	T	30535	-0.206235	0.0399450117831893	25004071	1.8534e-23	0.0206636343846575
ACSS1	rs6037311	20	A	C	31236	-0.13114	0.158441955582738	25978089	5.1647e-33	0.0109567098282594
ACSS1	rs6050129	20	A	G	31569	-0.103119	0.307673435494829	24898485	5.84e-33	0.00862291472574479
ACSS1	rs6115019	20	A	G	29836	0.140194085282867	0.0341666330115908	25043396	4.94e-10	0.0225352566721105
ACSS1	rs6132825	20	A	T	31568	-0.0658839	0.47012418374665	25238309	1.4253e-16	0.00797385112087233
ACSS1	rs66817095	20	T	G	30932	0.239766183966204	0.173260625749314	25038484	8.4677e-113	0.0106229894759178
ACSS1	rs714689	20	T	C	31569	0.0791561519305237	0.73276968370197	24714340	1.3512e-18	0.00899348428455646
ACSS1	rs7274899	20	G	T	31567	0.151696279515121	0.104239015551865	24984083	2.3768e-31	0.0130243819933821
ACSS1	rs73095985	20	C	T	24417	0.15253134802475	0.0298056043842415	25009045	9.937e-09	0.0266109576274446
ACSS1	rs74173666	20	A	C	31354	0.0651446106339864	0.134632215837741	25085185	2.5768e-08	0.0116994020749949
ACSS1	rs74383965	20	C	T	30547	-0.107087	0.0505849560301508	24211580	6.5999e-09	0.01846128712154
ACSS1	rs74644625	20	T	C	27909	-0.479935	0.0251160550056933	25041953	1.9592e-70	0.0270495903564629
ACSS1	rs74668297	20	T	G	28314	-0.246312	0.023710142432979	25005769	4.7478e-19	0.0276202698979259
ACSS1	rs75468569	20	A	G	29903	-0.269823	0.0384444981472531	25257027	6.9809e-37	0.0212678380775233
ACSS1	rs76370406	20	C	A	25906	0.179784476726555	0.0819931832365225	25025874	2.9915e-29	0.016013010735037
ACSS1	rs78735597	20	T	G	30477	-0.232453	0.0241319581135344	24799364	1.2831e-18	0.0263941126139156
gene	SNP	chr	effect_allele	other_allele	samplesize	beta	eaf	pos	pval	se
ACSS2	rs149394340	20	A	G	26941	-0.107763	0.0605751811594203	33929058	2.4106e-09	0.0180592525129705
ACSS2	rs2425050	20	G	A	31138	-0.0539089	0.246146820413289	33879478	6.824e-09	0.00930248855690945
ACSS2	rs6060257	20	T	G	31022	-0.100777	0.141508352127212	33720157	2.1487e-18	0.0115183701685178
ACSS2	rs663550	20	T	A	19802	0.085636094377294	0.591851518784972	33779268	5.4757e-17	0.0102238624631146
gene	SNP	chr	effect_allele	other_allele	samplesize	beta	eaf	pos	pval	se
ACTA2	rs10509539	10	T	G	31684	0.0534741621299633	0.314874666466233	89998283	4.0523e-10	0.00855285533571596
ACTA2	rs10887860	10	T	C	31682	-0.0499746	0.477355583117225	90588601	3.3125e-10	0.00795343152610321
ACTA2	rs111415372	10	C	T	31355	-0.185491	0.0480593607305936	90876554	2.9142e-23	0.0186697142523426
ACTA2	rs11202892	10	C	T	29066	0.186837266828539	0.0325538743695553	90680186	1.3042e-15	0.0233710180662138
ACTA2	rs11202917	10	A	G	31563	-0.550102	0.106368921775899	90741122	1e-200	0.0129094979829852
ACTA2	rs11202941	10	A	C	24376	-0.437372	0.0291435676907932	90793960	2.4552e-59	0.0269249507369925
ACTA2	rs11203046	10	T	C	31566	-0.108665	0.0822732248688234	91000321	6.2564e-14	0.0144840249548432
ACTA2	rs112653305	10	A	G	27898	-0.240261	0.0229154799982474	90515133	2.0276e-17	0.0282922783055189
ACTA2	rs113727399	10	C	A	27669	0.240030457586681	0.0315349207754271	90502756	5.7524e-23	0.0243248637054918
ACTA2	rs116850651	10	A	C	26217	-0.276103	0.0260145681581686	90936651	7.9855e-24	0.0274352526594281
ACTA2	rs117412548	10	T	C	28828	-0.149148	0.044983791521071	90612232	1.145e-13	0.020092979694901
ACTA2	rs117451088	10	G	A	27129	0.236745487317599	0.0205404915208126	90575362	5.2073e-15	0.030267005116097
ACTA2	rs117485125	10	A	G	27903	-0.297317	0.0284738041002278	90838320	1.5754e-31	0.025451275298507
ACTA2	rs117900829	10	A	G	24441	0.466179256815597	0.0262057213673448	90739782	6.5679e-61	0.0283135188683562
ACTA2	rs118179721	10	C	T	28474	0.202464958346839	0.0212615923757426	89872054	3.1784e-12	0.0290488906922493
ACTA2	rs12765241	10	A	G	31684	0.597449813384917	0.872073358638055	90740501	1e-200	0.0118934538382736
ACTA2	rs138064813	10	A	G	28633	-0.281371	0.0539731725952967	90481923	2.8122e-52	0.0184931493002882
ACTA2	rs138650913	10	T	C	24036	0.531679170500685	0.0214651125995464	90646294	4.9305e-64	0.0314701752917001
ACTA2	rs138685850	10	T	C	24053	0.213465143606157	0.0158868163136263	90859857	4.7989e-09	0.036463589150722
ACTA2	rs139478010	10	T	C	28445	0.244593627431497	0.0167308515190415	90202817	7.2866e-14	0.0326878837092891
ACTA2	rs140433253	10	A	G	25906	-0.201227	0.0493015217704383	90907386	3.5327e-23	0.0202923927763945
ACTA2	rs140501015	10	C	T	20114	0.274260382817986	0.0140301881774054	90201208	9.8133e-11	0.0423908595038464
ACTA2	rs141040595	10	T	G	8616	0.435133462888254	0.0143918291550604	90873446	1.0246e-11	0.0639619966027126
ACTA2	rs141324536	10	T	G	2821	0.653793320538399	0.0303084012761432	90849147	3.8036e-17	0.0776578080911281
ACTA2	rs141404387	10	C	T	28939	-0.126197	0.0357861213543413	91205927	1.7025e-08	0.0223768648025458
ACTA2	rs142730570	10	T	C	21768	0.228299776782971	0.0155454382076319	90664398	3.7971e-09	0.0387414985462117
ACTA2	rs144080079	10	G	A	23833	0.726479573762199	0.0175924938692824	90786815	1.4803e-96	0.0348406385038102
ACTA2	rs144565153	10	A	G	26610	0.396443967507174	0.0171116786626422	90902602	1.8916e-32	0.0334244422857603
ACTA2	rs144717390	10	T	C	28901	0.167171142372369	0.0269663392932091	89914675	7.5051e-11	0.0256775532029321
ACTA2	rs144754510	10	A	G	30902	-0.112353	0.796221009021567	91046508	2.2898e-29	0.00998608338175092
ACTA2	rs145179739	10	G	A	27794	-0.270075	0.0229323473744443	90808452	1.5488e-21	0.0283349794459856
ACTA2	rs146757074	10	A	G	22497	0.278985850311203	0.0182527838365285	90915911	2.341e-15	0.0352174821771823
ACTA2	rs148447968	10	T	C	29008	0.34565154194937	0.0198679647348849	90957938	3.3386e-31	0.0297513807840738
ACTA2	rs149358241	10	G	A	27294	-0.237618	0.0239659750663846	91084257	2.0487e-17	0.0279847465631229
ACTA2	rs149766826	10	A	G	22254	0.387980736806953	0.0134466499796263	90899413	4.2038e-21	0.041154148693392
ACTA2	rs150402819	10	A	C	24172	0.25715263496218	0.0189296748180342	90802046	1.3064e-14	0.033373907875484
ACTA2	rs151125516	10	A	G	26793	0.171982657663393	0.062275531816926	91044842	6.5448e-22	0.0178763143704089
ACTA2	rs1571015	10	G	A	31568	0.297373111277341	0.874891480768505	90792175	6.4231e-135	0.0120293159691004
ACTA2	rs17378702	10	C	G	31225	-0.174047	0.19112810707457	90834280	1.4439e-65	0.0101772777490334
ACTA2	rs17438148	10	A	G	31226	0.144172245193238	0.0874345149325074	90600427	2.5119e-24	0.0141661994648074
ACTA2	rs17447091	10	A	T	31240	-0.292275	0.140760557997325	90731269	2.0891e-142	0.0115035503441123
ACTA2	rs181231792	10	C	T	14185	0.37497536842024	0.0181119648737651	90452713	3.6822e-17	0.0445201444233657
ACTA2	rs181613407	10	C	T	27694	-0.7039	0.0291790087979133	90777555	4.3861e-171	0.025245693872872
ACTA2	rs184180807	10	T	C	26327	-0.155778	0.0280679465462074	91009948	3.5479e-09	0.0263852396166699
ACTA2	rs185936052	10	T	G	27699	0.202670490112093	0.0219678217821782	89950908	2.7099e-12	0.0289856395234755
ACTA2	rs186205233	10	T	C	28948	-0.47779	0.0226825283793407	90758802	1.1084e-65	0.0279133626102019
ACTA2	rs189260064	10	C	A	23198	0.473668219790663	0.967692986812338	90737271	9.4887e-73	0.0262568442993084
ACTA2	rs190682969	10	A	T	24929	-0.274844	0.0281807192505289	90298584	3.1096e-24	0.027062242485852
ACTA2	rs1926202	10	C	T	30746	0.202904376639544	0.528495189123914	90787957	3.276e-139	0.00807843262834213
ACTA2	rs1926203	10	C	A	31300	0.0825465457064794	0.63908484270734	90727334	3.4419e-23	0.0083220632832422
ACTA2	rs1998629	10	T	A	31568	0.0860813510618657	0.724191295813989	90664283	4.1804e-22	0.0089049366445494
ACTA2	rs2018705	10	G	T	31566	-0.0747985	0.263617832471405	90047350	1.2256e-16	0.0090330871899595
ACTA2	rs2071509	10	G	C	31231	-0.0671489	0.529037314574094	90988250	5.4294e-17	0.00801596209394437
ACTA2	rs2071511	10	T	C	26816	-0.0613151	0.422611655397636	90987458	2.3094e-12	0.00874144565749327
ACTA2	rs2163673	10	G	A	31684	-0.0537989	0.591360066143034	90487519	2.7834e-11	0.00808106500559017
ACTA2	rs2251633	10	C	T	31684	-0.0569131	0.289093915592469	90903281	8.3033e-11	0.00876272956147178
ACTA2	rs2254636	10	T	C	31684	0.0802760205881553	0.874516141155248	90987007	2.1685e-11	0.0119918766377095
ACTA2	rs2576159	10	T	A	31569	-0.0585874	0.308541556578848	90296467	1.0476e-11	0.00861617903234946
ACTA2	rs2604962	10	G	A	31561	0.0804629225958069	0.217265725288832	90568516	7.6457e-17	0.00965176721874708
ACTA2	rs2862834	10	A	G	31569	0.447638662827436	0.132596059485166	90741374	1e-200	0.0117348781740533
ACTA2	rs303482	10	T	G	27286	-0.430436	0.0259781189500698	90536805	1.3846e-57	0.0269108154308668
ACTA2	rs303538	10	A	T	31569	-0.118987	0.22280516343323	90561945	1.5536e-35	0.00956372347979214
ACTA2	rs34793067	10	C	G	31563	-0.0795651	0.117260646330414	91292292	1.2627e-10	0.0123709621593048
ACTA2	rs35595938	10	G	A	29084	0.203680692674158	0.0335915698279812	91345452	8.6894e-19	0.0230124272869604
ACTA2	rs389089	10	A	C	27980	0.1891520152215	0.0481990831696136	90501517	9.3539e-22	0.0197364345643736
ACTA2	rs41284094	10	C	T	26371	-0.281004	0.0150497746055597	90576521	3.9282e-15	0.0357642863117159
ACTA2	rs41284128	10	A	G	27577	-0.225515	0.0173984534708026	91038280	4.3598e-12	0.0325662271616242
ACTA2	rs4554789	10	C	T	31684	0.0667079380242396	0.134634897966853	90975322	9.937e-09	0.0116382180160228
ACTA2	rs4934439	10	A	G	31684	0.155923335840811	0.751756924348905	90831991	1.7378e-64	0.00919576172687017
ACTA2	rs4934470	10	T	C	31684	0.0586937542271751	0.768856401969259	91067438	4.7122e-10	0.00942326593892288
ACTA2	rs61852567	10	A	G	28852	0.209996718572392	0.0212179837658241	90669755	3.6055e-13	0.0288869702008903
ACTA2	rs61852617	10	C	T	22417	0.765636110890021	0.0178468458078653	90785203	3.4381e-102	0.0356718729594247
ACTA2	rs61854006	10	C	A	28324	-0.243283	0.0230547550432277	90538657	3.6244e-18	0.0279957651399026
ACTA2	rs61854887	10	A	G	23505	0.189495531148823	0.0188279978296256	90926066	2.3478e-08	0.0339336230411732
ACTA2	rs67083850	10	G	T	30077	-0.0807662	0.0911727061835053	89901139	1.1827e-08	0.014164284483342
ACTA2	rs7069914	10	G	A	30739	0.193570465202608	0.0349516832917706	90996144	1.2011e-18	0.0219599606569263
ACTA2	rs7085705	10	C	G	31566	-0.890084	0.327564078366238	90742467	1e-200	0.00848011298238658
ACTA2	rs72807376	10	C	G	27657	-0.34005	0.0267026835532725	90566278	4.9161e-38	0.0263743794310023
ACTA2	rs72807379	10	A	G	26553	0.265562320074738	0.0183909116305056	90577847	1.9914e-16	0.0322966361095928
ACTA2	rs72809332	10	T	C	28633	-0.356051	0.0355717802869514	90687486	4.165e-56	0.0225612844007325
ACTA2	rs72814182	10	T	C	28435	-0.177707	0.0231806506849315	89745960	1.8035e-10	0.0278668864354944
ACTA2	rs73360785	10	T	G	26302	0.224462873088869	0.0203514392047864	90097621	3.6216e-13	0.0308786211809922
ACTA2	rs74147302	10	C	G	31105	0.169195154588657	0.0406838263542067	90637278	7.6328e-17	0.0202944889754897
ACTA2	rs75082203	10	A	G	27344	0.249478163612003	0.0168171000044905	90366743	6.2947e-14	0.0332553304645493
ACTA2	rs75769061	10	G	A	26341	0.182991771538278	0.0223596350982789	89893105	5.3052e-10	0.0294677485206329
ACTA2	rs76061244	10	G	A	31240	0.140345224402649	0.0799732467036117	90869794	1.8067e-21	0.0147488071715847
ACTA2	rs76639263	10	G	A	27135	0.360746557799899	0.0932003626473255	90739319	7.9737e-132	0.014765753676632
ACTA2	rs76982058	10	A	G	31065	0.186341976170272	0.0465178914967295	89956483	1.3453e-22	0.0190494761981468
ACTA2	rs77389023	10	A	G	30077	0.0703842357253337	0.145708343332533	91019238	1.1263e-09	0.0115563969666421
ACTA2	rs78209918	10	T	C	28277	-0.478038	0.0366347728644082	90738429	3.3713e-101	0.0223834023540711
ACTA2	rs78651267	10	G	A	31569	-0.0985026	0.109590850758662	89841482	1.0604e-14	0.0127400940329162
ACTA2	rs79088820	10	A	G	28313	-0.181711	0.0392675789654876	90095356	4.5106e-17	0.0216358405150421
ACTA2	rs79127111	10	T	C	15655	0.320333348164915	0.0138941398865784	90701477	3.2538e-11	0.0482815120751375
ACTA2	rs7916050	10	T	C	31561	0.0840473817995822	0.747111681643132	90141582	4.3754e-20	0.00915698445275178
ACTA2	rs80214796	10	A	C	25453	-0.453112	0.0224016095789577	90738449	1.0395e-51	0.0299499197128779
ACTA2	rs814618	10	C	T	31563	-0.0685648	0.212756720024162	90443316	1.784e-12	0.00972522684592996
ACTA2	rs9658696	10	A	G	23122	-0.5246	0.015847509281321	90756576	4.4632e-45	0.037235792232934
ACTA2	rs9658702	10	A	G	31569	-0.42966	0.0521816260285348	90757245	2.1864e-127	0.0178950626784872
ACTA2	rs9658713	10	G	C	31240	-0.588577	0.0349894897764189	90759156	5.8907e-161	0.0217718163896342
gene	SNP	chr	effect_allele	other_allele	samplesize	beta	eaf	pos	pval	se
ACVR1	rs144321421	2	G	C	28372	-0.179309	0.0350903549813281	158742322	3.8475e-15	0.0228140727440464
ACVR1	rs16842215	2	G	T	31684	0.228480018696931	0.0532150776053215	158724552	3.9633e-38	0.0176979100462379
ACVR1	rs2108812	2	T	C	31568	0.0985755673862372	0.0694711810666969	158823815	3.0229e-10	0.0156528784594508
ACVR1	rs35160507	2	T	C	31229	-0.31171	0.0762789630649231	158752065	5.3985e-95	0.0150741612205761
ACVR1	rs56146419	2	G	A	31229	0.0550939450296378	0.194865030205705	158881701	4.936e-08	0.0101019371868491
ACVR1	rs6437120	2	C	T	31557	0.0461071828237888	0.476248017521335	158785150	7.2512e-09	0.00796998890663754
ACVR1	rs6726288	2	C	T	17695	-0.278825	0.0158478605388273	158585869	5.723e-11	0.0425640826512959
ACVR1	rs78280826	2	T	C	29143	-0.1619	0.0596435100548446	158809750	2.1065e-20	0.0174900082324861
gene	SNP	chr	effect_allele	other_allele	samplesize	beta	eaf	pos	pval	se
ACY3	rs10791929	11	A	C	19680	0.0873241909260366	0.139278455284553	67510471	1.9927e-09	0.0145579139313878
ACY3	rs11227930	11	C	T	19948	0.104794727456925	0.0883045919390415	67528778	2.8677e-09	0.0176448834767768
ACY3	rs11560935	11	G	T	22176	0.0886611801879546	0.0977408008658009	67493854	2.9429e-08	0.0159896806413018
ACY3	rs141275259	11	A	G	18686	0.251748555531685	0.0174462164187092	67213428	1.8682e-10	0.0395091818031803
ACY3	rs2509717	11	C	T	25826	-0.115232	0.0801324246882986	67416375	1.1571e-12	0.0162065148510532
ACY3	rs2514047	11	T	A	26071	0.0572611181653045	0.632791223965325	67461330	2.9232e-10	0.00908488444451038
ACY3	rs2514048	11	A	G	17469	-0.21777	0.0231266815501746	67461945	9.4638e-10	0.0355938688354976
ACY3	rs61894523	11	A	G	26609	0.35494448629962	0.083768649704987	67420350	6.3582e-114	0.0156468671086512
gene	SNP	chr	effect_allele	other_allele	samplesize	beta	eaf	pos	pval	se
ACYP2	rs11125513	2	A	G	30721	0.0874960061875562	0.178698936450073	53854488	9.6838e-17	0.0105306493419616
ACYP2	rs112145784	2	C	T	23522	0.250274863862051	0.015919629057187	53993246	1.0876e-11	0.0368354621249928
ACYP2	rs113506637	2	T	C	24250	0.294016316202341	0.042854305293475	54188026	2.7449e-39	0.0224203751927238
ACYP2	rs116401567	2	A	G	28432	-0.186662	0.0269531	54589685	5.653e-13	0.0258946385386972
ACYP2	rs116521094	2	T	C	25424	-0.166166	0.0319303678678679	53828849	4.4639e-11	0.0252236425237523
ACYP2	rs12471250	2	C	T	30605	-0.167584	0.309270373306156	54644803	7.4822e-82	0.00874511669149494
ACYP2	rs13026765	2	C	A	30717	0.0932913545039575	0.353749295245255	54571909	2.055e-28	0.00843815107806307
ACYP2	rs13028962	2	T	C	26092	-0.274071	0.0441082802547771	54587319	7.9796e-38	0.0213190036904134
ACYP2	rs13417064	2	G	A	30606	0.107883934171911	0.0619951687174455	54362726	1.2234e-10	0.0167610126731365
ACYP2	rs13429859	2	C	G	30086	-0.115788	0.136347886347886	54323982	1.9075e-22	0.0118798006092486
ACYP2	rs138364278	2	G	A	30262	-0.13247	0.129502868068834	53843564	7.2261e-28	0.0121063387839386
ACYP2	rs140071766	2	C	A	24270	0.279707059855111	0.0209346165294176	53971086	1.1203e-18	0.0317038322306728
ACYP2	rs141776959	2	C	T	23772	0.340689751419221	0.0193355960094621	54194417	1.4673e-24	0.0333052849578388
ACYP2	rs143812813	2	A	G	27860	-0.158416	0.0345713323227219	54757685	8.3856e-12	0.0231886941445794
ACYP2	rs143821275	2	C	T	25536	-0.118483	0.0577856609410007	53558206	4.1574e-10	0.0189637259332436
ACYP2	rs144262608	2	A	C	28531	-0.167466	0.0367336909783365	54683182	5.264e-14	0.0222546636978052
ACYP2	rs146160116	2	T	C	25687	-0.14217	0.0318887601390498	54317048	1.4962e-08	0.0251100085857506
ACYP2	rs148798736	2	T	C	19738	-0.281085	0.018213598135576	53851719	8.1299e-14	0.0376380442476614
ACYP2	rs149909028	2	C	T	26055	-0.323998	0.0201658843366905	54456883	2.5694e-25	0.0311640971241325
ACYP2	rs164941	2	C	T	30602	0.104666854314788	0.104020385050963	54993592	2.6793e-15	0.0132404212868639
ACYP2	rs17045881	2	C	G	30605	0.143589904231879	0.816158985392368	54649068	4.3986e-43	0.0104347061385878
ACYP2	rs17578112	2	C	A	30603	-0.126003	0.226303272809633	53856094	6.8753e-39	0.00965989050598242
ACYP2	rs17579618	2	A	G	23737	0.257051605251132	0.0221910828025478	53921754	1.5813e-16	0.0311570150118945
ACYP2	rs185693278	2	A	G	19416	0.253265230096443	0.0211055933089388	54400443	7.3158e-13	0.0353051787242727
ACYP2	rs2160929	2	C	T	30603	-0.340955	0.479728964553999	53881872	1e-200	0.00809077653907045
ACYP2	rs241660	2	T	C	30599	0.116330406282665	0.0967833276701778	54925311	1.7635e-17	0.0136720972054939
ACYP2	rs2949813	2	G	C	30601	-0.140726	0.0688965230850542	54024957	1.1673e-18	0.0159595104628507
ACYP2	rs3796009	2	C	T	30605	-0.0965683	0.126222020911184	55040038	2.1117e-15	0.012170844056206
ACYP2	rs4671857	2	C	A	26347	0.272463417815786	0.101619069035305	54339535	1.1936e-79	0.0144178846951881
ACYP2	rs4671869	2	A	G	11938	-0.371586	0.0139136501046431	54353344	1.7511e-11	0.055251134817153
ACYP2	rs4671934	2	G	C	30590	-0.0712436	0.439610242465443	54687523	2.1988e-18	0.00814547224088182
ACYP2	rs62139281	2	G	A	27258	0.275809291981911	0.0289034822431522	54153284	3.8883e-27	0.0255641716933062
ACYP2	rs72793667	2	A	G	29114	0.224724650828562	0.0634749220062395	53946431	6.6023e-40	0.0169970389541624
ACYP2	rs72800761	2	G	A	30392	-0.247735	0.0957001522070015	54360649	3.4825e-72	0.0137877315422756
ACYP2	rs72908759	2	A	C	29939	0.189623082283302	0.0927130522321601	54474998	2.7855e-41	0.0140904085634364
ACYP2	rs736085	2	A	G	29896	0.0714979504585085	0.182458113558796	53835083	1.4562e-11	0.0105886809618217
ACYP2	rs74412974	2	C	T	27347	-0.263417	0.0318700236711857	54649932	2.7318e-27	0.024342889635338
ACYP2	rs74998738	2	T	C	6638	0.398540978060808	0.0467008134980416	54272105	3.358e-22	0.0411329202981503
ACYP2	rs75225741	2	G	A	18238	0.338269719484586	0.0202959028831563	54210656	8.2534e-20	0.0371316925888678
ACYP2	rs7574483	2	G	A	29114	0.100246516082168	0.143448524118071	53853135	2.2675e-17	0.0118224990367327
ACYP2	rs7575748	2	G	A	25738	-0.0959774	0.569314713770462	53841246	4.1506e-27	0.0089010529047953
ACYP2	rs7587874	2	G	A	29114	-0.0601588	0.250659947204224	54616058	3.1421e-10	0.00956207439131286
ACYP2	rs76205147	2	A	G	27285	0.273138922679206	0.0419453674535019	54292484	1.8456e-37	0.0213543267566693
ACYP2	rs76949049	2	T	C	29246	-0.124857	0.109135036205936	54965697	4.6949e-21	0.0132606168346617
ACYP2	rs77456006	2	A	G	28810	0.136756997969061	0.039375657948012	54813272	1.7207e-10	0.0214201578775254
ACYP2	rs79616495	2	G	A	28709	-0.149278	0.0253486197503761	54255531	1.8832e-08	0.0265505890099923
ACYP2	rs80268724	2	T	A	30598	-0.326926	0.123291550252964	54309700	9.0022e-156	0.0122954443689448
ACYP2	rs805339	2	C	T	21181	0.289229550820016	0.0152773657668348	54187846	2.8479e-13	0.0396123468903672
ACYP2	rs843682	2	T	C	30706	-0.192674	0.447412950289539	54492671	1.3482e-124	0.00811556485570579
ACYP2	rs888519	2	T	A	30592	-0.0503496	0.319505287009063	53811058	6.345e-09	0.0086702109598446
ACYP2	rs9678301	2	T	G	27828	-0.367561	0.933188564682071	54241510	5.8199e-104	0.0169759426645113
gene	SNP	chr	effect_allele	other_allele	samplesize	beta	eaf	pos	pval	se
ADAL	rs10400813	15	T	A	27193	-0.151533	0.053553666696808	44535366	1.7769e-15	0.0190464411273289
ADAL	rs12592921	15	C	A	25732	0.0733664244291849	0.144188410708234	44248752	5.0233e-09	0.0125485623147102
ADAL	rs183215377	15	A	G	17856	-0.254464	0.014748454737501	43421204	6.7592e-09	0.043898137182898
ADAL	rs2615293	15	A	T	29928	-0.300978	0.0488673399589587	44414328	9.3811e-57	0.0189590362755463
ADAL	rs2733210	15	G	C	30441	-0.129202	0.0356185445083971	44457206	3.4503e-09	0.0218671928441619
ADAL	rs28364553	15	C	T	29836	-0.185915	0.0393360526634627	42705342	1.0599e-18	0.0210587974951147
ADAL	rs28377539	15	A	G	27156	-0.125173	0.312282052443277	44079673	1.2081e-41	0.00925919883642439
ADAL	rs34714662	15	T	C	26731	0.0785170603904312	0.217999630587366	43294094	6.5996e-14	0.0104748072774662
ADAL	rs35311230	15	C	G	31231	0.0905615938035747	0.19888362134883	43633497	1.6521e-19	0.0100240850309456
ADAL	rs491648	15	C	T	31557	-0.460786	0.120874556302394	43588439	1e-200	0.0122108044416404
ADAL	rs7167802	15	C	A	31295	-0.10467	0.274332570556827	43116906	1.5424e-31	0.00895859745224655
ADAL	rs72721553	15	T	C	25514	-0.392747	0.0225059934439063	43502526	1.5067e-39	0.0298462368407091
ADAL	rs73410981	15	A	G	19822	-0.20814	0.0239031667457788	43056329	2.4484e-10	0.0328804001216367
ADAL	rs8024266	15	T	C	31684	-0.0574471	0.200890676087038	43066681	6.8648e-09	0.00991475554117088
ADAL	rs80339483	15	T	C	26370	-0.250445	0.0530640995538859	43401074	4.9416e-38	0.0194253676337478
gene	SNP	chr	effect_allele	other_allele	samplesize	beta	eaf	pos	pval	se
ADAM12	rs11244857	10	A	G	31684	0.060251290533087	0.625540230748995	127851943	2.1264e-13	0.00820795173869806
ADAM12	rs12251249	10	A	C	31355	0.0605900243347603	0.331335616438356	127720923	9.2251e-13	0.00848385901800111
ADAM12	rs12775804	10	A	G	30817	0.0598735003751783	0.326198430580375	127463239	3.2011e-12	0.00859177470334184
ADAM12	rs1676741	10	A	G	31355	0.157415089857205	0.0550228310502283	127851530	2.504e-19	0.0175125535235579
ADAM12	rs17154488	10	C	T	26712	0.150453855420267	0.0259047002819245	127882922	3.3137e-08	0.0272359036621833
ADAM12	rs2138277	10	C	A	31568	-0.0989302	0.422186992790548	127672039	1.1949e-34	0.00805777964655825
ADAM12	rs2279091	10	T	C	31684	0.0885980579962621	0.103442444285768	127753388	1.1059e-11	0.0130444726142906
ADAM12	rs2446695	10	A	G	30817	0.0498548488990693	0.622251573304328	127802092	1.9659e-09	0.00830817219642196
ADAM12	rs898325	10	A	C	31355	0.185468098183821	0.150913242009132	127855523	4.5479e-62	0.0111555732234518
gene	SNP	chr	effect_allele	other_allele	samplesize	beta	eaf	pos	pval	se
ADAM1A	rs111615149	12	C	G	5502	1.14839126291788	0.0477565526432697	112331358	1.5354e-145	0.0447027487073662
ADAM1A	rs112564165	12	A	G	3792	-0.660284	0.0143738514045681	111882600	7.6904e-12	0.0964735264946609
ADAM1A	rs11613181	12	C	A	5496	-0.154211	0.148573469157614	111599838	8.8927e-09	0.0268174462369661
ADAM1A	rs118063774	12	A	G	4672	-0.506527	0.0366764201392392	111553214	3.468e-20	0.0550369071247325
ADAM1A	rs12423572	12	C	A	5501	-1.00243	0.0846450005661873	112615919	2.6814e-188	0.0342506442270412
ADAM1A	rs232935	12	T	C	5164	0.130344580982242	0.458503584920207	113115628	4.106e-11	0.019747982089304
ADAM1A	rs34560882	12	A	C	5164	-0.192952	0.728888372633291	113164710	2.8567e-18	0.0221353963256211
ADAM1A	rs41455646	12	T	C	4586	0.682562856561339	0.0196057873768086	111746598	1.2714e-19	0.0753139565217909
ADAM1A	rs7137093	12	C	T	5164	-0.157418	0.303260323714606	111759536	1.9265e-13	0.0214066553564435
ADAM1A	rs74533665	12	A	G	5164	0.394451910433773	0.0715763507599268	113225583	4.9558e-25	0.0381710416723541
ADAM1A	rs76643428	12	G	A	5502	0.391341019308546	0.043324878948582	111490653	6.4007e-17	0.0468245691715978
ADAM1A	rs78777545	12	A	G	4339	-0.446702	0.0211785923181907	113117790	2.0779e-09	0.0745572536685188
ADAM1A	rs79861201	12	A	G	5499	0.339792441401465	0.026230427295663	112825994	1.2337e-08	0.0596639991223095
gene	SNP	chr	effect_allele	other_allele	samplesize	beta	eaf	pos	pval	se
ADAMTS13	rs116856166	9	A	G	7694	-0.541402	0.0186508968027034	136388479	1.0275e-19	0.059586419069886
ADAMTS13	rs137855938	9	G	A	7882	-0.540429	0.0233443288505455	136312396	1.2385e-24	0.0527479216644174
ADAMTS13	rs28650090	9	G	T	17968	0.0591227636051447	0.592811571884281	136352390	3.6625e-08	0.0107369043140188
ADAMTS13	rs28680325	9	A	C	23287	0.128753250926924	0.343900259563423	136316367	8.9381e-40	0.00975499488032337
ADAMTS13	rs3118665	9	T	C	22351	-0.272661	0.0972745402171505	136283389	1.9864e-65	0.0159609627472727
ADAMTS13	rs491105	9	C	T	26277	0.0546335774887901	0.323090861047148	136186926	4.713e-09	0.00932759296059382
ADAMTS13	rs8176635	9	A	G	26395	0.0671455612857051	0.3541846743583	136152009	1.6044e-13	0.00910028749941791
gene	SNP	chr	effect_allele	other_allele	samplesize	beta	eaf	pos	pval	se
ADAMTS6	rs114969787	5	T	C	21155	0.178588346636206	0.034389033325455	65066483	2.1715e-11	0.0266788686340314
ADAMTS6	rs116309955	5	A	G	23216	-0.164956	0.0334252239834597	64874904	1.6676e-10	0.0258188213680624
ADAMTS6	rs116336503	5	A	G	25332	0.159298780170429	0.0732472761724301	65084686	9.4531e-21	0.0170518925466098
ADAMTS6	rs116474939	5	A	G	15256	-0.260458	0.983842422653382	64922205	9.6824e-09	0.0454060546789415
ADAMTS6	rs11738728	5	A	G	26609	-0.0522856	0.646529369762111	64238731	8.1079e-09	0.00906775816654013
ADAMTS6	rs11948255	5	T	C	20791	0.209423748096157	0.0452359193881968	64818025	7.0059e-19	0.0235970420390036
ADAMTS6	rs13182105	5	G	A	26156	-0.116394	0.724059489218535	65023368	1.1892e-32	0.00978147796901465
ADAMTS6	rs13183791	5	A	C	25331	0.12442196346836	0.0497809008724488	64534641	1.1235e-09	0.0204275170284129
ADAMTS6	rs1542168	5	C	T	26609	0.0686331049940569	0.258747040475027	65115288	4.0968e-12	0.00989805379204743
ADAMTS6	rs171531	5	G	A	23726	0.265944530136806	0.382850037933069	64788843	1.8282e-174	0.00944415352922103
ADAMTS6	rs2161279	5	A	G	26165	-0.155785	0.0458627938085228	64916006	8.9868e-14	0.0208972415864301
ADAMTS6	rs62368871	5	A	G	26491	-0.0941442	0.0795741950096259	65007913	4.4967e-09	0.0160529667402232
ADAMTS6	rs62368976	5	T	C	26280	-0.0732546	0.129908675799087	64761334	1.6384e-08	0.0129739083193249
ADAMTS6	rs6874043	5	A	G	25827	-0.104074	0.074824795756379	63969293	4.8587e-10	0.0167229641422239
ADAMTS6	rs72760602	5	T	C	26164	-0.169536	0.0628344289863935	64772130	4.905e-21	0.0180146543172562
ADAMTS6	rs72764480	5	T	G	21994	-0.136182	0.0833636446303537	64957299	2.8892e-15	0.0172482884307601
ADAMTS6	rs7711329	5	T	C	26609	-0.0704843	0.209684693148935	65126029	3.6066e-11	0.0106484688425387
ADAMTS6	rs786538	5	A	C	25090	0.142970778743206	0.0565165404543643	64756858	1.4098e-13	0.0193321315317701
ADAMTS6	rs78899905	5	T	C	23060	0.17547795450824	0.0418690372940156	64827996	4.4267e-14	0.0232485796722585
ADAMTS6	rs9291834	5	T	C	26156	0.0676965435047636	0.484305704236122	64602788	1.0115e-14	0.00874869712774314
gene	SNP	chr	effect_allele	other_allele	samplesize	beta	eaf	pos	pval	se
ADA	rs117088905	20	T	C	10396	-0.524401	0.0220127350512387	43272433	1.3296e-28	0.0472659361299781
ADA	rs117922695	20	G	A	10656	0.60432670824989	0.024727433454474	43298995	1.0097e-42	0.0441098287106229
ADA	rs118001674	20	T	C	11496	-0.18193	0.0425306314797361	43235930	2.5946e-08	0.0326812203129937
ADA	rs13037996	20	C	T	14261	-0.0650786	0.534614223161709	43364355	4.2007e-08	0.0118708879243499
ADA	rs140466016	20	A	G	10333	0.321834807112117	0.0430300313760645	43284692	6.0919e-21	0.0342796833479381
ADA	rs2007720	20	G	A	14263	0.457502347843877	0.252016742770167	43276688	1e-200	0.0136370026720602
ADA	rs371927	20	G	A	14263	0.153139229670315	0.09779299847793	43263036	1.5589e-14	0.0199329961693564
ADA	rs3787359	20	G	A	14250	0.264724077594062	0.180657830142366	43266854	2.9551e-66	0.0153963055481018
ADA	rs4812858	20	T	C	14263	0.110397375847528	0.315305493672086	43349217	4.579e-18	0.0127428147801152
ADA	rs4812860	20	A	G	14263	-0.15429	0.0568112633181126	43376364	1.6154e-09	0.0255777910202724
ADA	rs6031693	20	A	G	14259	-0.180455	0.035437430786268	43275839	1.7587e-08	0.032029056923554
ADA	rs6031762	20	G	A	11496	0.178823731239419	0.926934036490452	43347566	1.7087e-12	0.0253413444490858
ADA	rs6130661	20	A	G	13100	-0.118857	0.813334933205344	43300935	6.5695e-14	0.0158556158934465
ADA	rs6130676	20	A	G	14263	0.286241128614866	0.0468638430606186	43334843	1.6538e-24	0.0280145169721721
ADA	rs62204566	20	G	C	13925	0.356559121046485	0.270821233592752	43303457	4.4623e-154	0.0134843196008882
ADA	rs62204569	20	A	G	8914	0.487705827005599	0.014748246492986	43311647	4.1737e-15	0.0621305052429518
ADA	rs73598374	20	T	C	14169	0.16498085368056	0.0580154760043771	43280227	8.448e-11	0.0254109901702826
ADA	rs74414692	20	A	G	10656	-0.231944	0.0374627393522963	43171158	1.276e-10	0.0360727586172438
gene	SNP	chr	effect_allele	other_allele	samplesize	beta	eaf	pos	pval	se
ADCY9	rs11076796	16	A	G	30192	-0.18678	0.101982720866346	4047217	7.2835e-44	0.0134472480759059
ADCY9	rs11076804	16	C	G	31346	0.404396122191224	0.614670168627003	4104389	1e-200	0.00820647315502192
ADCY9	rs11076825	16	A	G	22839	-0.0572275	0.323012834947084	4253992	1.0678e-08	0.0100056740897815
ADCY9	rs11641279	16	T	C	30394	0.0572003360594247	0.409435601722027	3895914	4.0737e-12	0.00824830363664773
ADCY9	rs116875306	16	G	T	25540	-0.243033	0.0208160273637918	4183048	4.4343e-15	0.030991563206758
ADCY9	rs117387987	16	T	G	28234	0.382673123325422	0.0217410078155361	4150797	3.8656e-40	0.0288557280664039
ADCY9	rs117452206	16	T	C	26846	0.438845952531987	0.0199807082816591	4079526	6.0196e-46	0.0308405743372562
ADCY9	rs117787884	16	C	T	25678	-0.247464	0.0149007426102995	4140932	1.0876e-11	0.0364217201075598
ADCY9	rs118189216	16	T	C	22362	0.296470401576782	0.0153872852432464	4270850	1.1891e-14	0.038416337524365
ADCY9	rs12921952	16	A	G	26795	-0.135688	0.0328959484346225	4232770	2.1116e-08	0.0242186713608481
ADCY9	rs140028696	16	A	G	30077	-0.160748	0.0655947524198064	4129362	1.6584e-22	0.0164689367372566
ADCY9	rs140294687	16	T	C	2191	0.498442909577597	0.0317206754906435	4574561	7.3642e-09	0.0861970237570637
ADCY9	rs141360876	16	A	G	28253	0.388500926613143	0.026188627146432	4135150	3.1692e-49	0.0263426177524507
ADCY9	rs143856531	16	T	C	24930	-0.289982	0.0276001007302946	4137730	2.7413e-26	0.0273366993732745
ADCY9	rs147990649	16	T	C	16877	0.342933938522471	0.0168191831892899	4202562	5.4152e-16	0.0423270721454543
ADCY9	rs149756410	16	C	T	23809	0.37458491461628	0.01830895697662	4046196	6.0427e-28	0.0341818220042961
ADCY9	rs170839	16	T	C	30077	0.093494915348333	0.310855131589473	4201484	2.5873e-26	0.0088091389515455
ADCY9	rs17621932	16	T	C	26617	-0.122485	0.0614613313527063	4348576	1.1417e-11	0.0180458931995046
ADCY9	rs17794435	16	C	T	19200	0.429465867320002	0.0174513274336283	4134868	3.0606e-28	0.0389711406720449
ADCY9	rs193102649	16	A	G	10930	0.398171820207052	0.0136322049405307	4129495	8.7072e-12	0.0583273742338024
ADCY9	rs2238448	16	T	C	31558	0.239672283829616	0.462013367065665	4059439	5.512e-198	0.00798393979305367
ADCY9	rs2239306	16	C	A	30722	0.22911216666724	0.0499083713494756	4038040	3.9526e-35	0.0185263905510916
ADCY9	rs2239311	16	C	T	31684	0.165032613246884	0.0851591566763125	4066191	4.3381e-31	0.0142323478946224
ADCY9	rs2240668	16	C	T	31684	0.0649145488005663	0.198992821977526	4240907	6.8457e-11	0.00995011477629772
ADCY9	rs2283498	16	T	C	31566	-0.335337	0.258691631120003	4126201	1e-200	0.0090883403995449
ADCY9	rs2601817	16	T	G	27979	0.0883823484348713	0.232797764582606	4077138	9.9562e-19	0.0100028688654969
ADCY9	rs34453134	16	C	T	29659	-0.250237	0.0441750732183534	4120788	5.5601e-36	0.0199815390015954
ADCY9	rs35713275	16	A	G	25554	0.113093911184464	0.0483910347184921	4431360	4.1021e-08	0.0206131251589291
ADCY9	rs58384172	16	T	C	30018	0.251717608425483	0.0502345347392054	4057707	2.2921e-41	0.0186846405054583
ADCY9	rs60753670	16	G	A	31231	-0.120845	0.328375898455421	4218001	1.1542e-45	0.00852007236938762
ADCY9	rs62039297	16	A	G	31017	-0.0853466	0.7602536427415	4254699	1.1326e-19	0.00940437295111365
ADCY9	rs6500586	16	C	T	26999	-0.153364	0.0580870279146141	4253834	7.6846e-17	0.0183978128084062
ADCY9	rs6500589	16	G	A	31684	0.0702400409896709	0.277161862527716	4261064	2.4885e-15	0.00887519155311603
ADCY9	rs72762751	16	C	T	29103	0.171712399539437	0.0447394706176128	4044803	1.0883e-17	0.0200497880199709
ADCY9	rs72764611	16	C	T	30658	-0.25275	0.0376226400343978	4144956	1.0599e-32	0.0212234391142062
ADCY9	rs72764696	16	C	T	23554	-0.240639	0.0169922614860111	4281765	1.4764e-11	0.0356491030407696
ADCY9	rs73497182	16	C	T	31225	0.0928020477178848	0.0676864244741874	4292867	5.684e-09	0.0159294942699517
ADCY9	rs75349174	16	A	G	25868	0.192951763904903	0.0280142355600442	4341782	4.4212e-13	0.0266430681577034
ADCY9	rs75704349	16	A	C	29832	-0.151289	0.0292644504584562	4197292	4.7062e-10	0.0242897566202697
ADCY9	rs77096739	16	A	G	24897	0.384599328576214	0.0199021289476339	4160241	4.2074e-33	0.0320868439185242
ADCY9	rs78865787	16	G	A	25173	-0.376674	0.0307990844860185	4156809	2.7113e-48	0.0257953665086627
ADCY9	rs79784851	16	A	G	23243	-0.198958	0.0236404667547336	3986499	7.1632e-11	0.030528537679054
ADCY9	rs79863877	16	A	G	30901	-0.163183	0.148048478277705	4134199	4.6488e-47	0.0113263328379769
ADCY9	rs879619	16	A	G	28500	0.101999831419017	0.140234791889007	4015046	2.7718e-17	0.012062706239388
ADCY9	rs887248	16	T	C	31240	0.120476681872766	0.0524173514236576	4164337	1.9277e-11	0.017950783263468
gene	SNP	chr	effect_allele	other_allele	samplesize	beta	eaf	pos	pval	se
ADD2	rs10164951	2	T	A	31355	-0.143847	0.391994413829546	70894426	3.1537e-69	0.00817970941967471
ADD2	rs10169949	2	G	A	30803	0.0699358094261426	0.861286716521471	70833018	1.9756e-09	0.0116561625070655
ADD2	rs11690349	2	T	C	31470	0.0797175563628683	0.285354579277688	71054245	1.698e-19	0.00882671084913394
ADD2	rs2052273	2	A	G	31355	0.076659647269775	0.283894466671699	70944880	4.9033e-18	0.00885655085894554
ADD2	rs3860458	2	A	G	31355	-0.102234	0.0936438438891825	70953095	8.7447e-14	0.013707003984468
ADD2	rs55991838	2	T	C	30688	-0.129485	0.0966430479730515	70878820	2.5821e-21	0.0136611010761336
ADD2	rs74441901	2	T	G	31349	-0.137411	0.0539112050739958	70878595	7.7992e-15	0.0176834780198379
ADD2	rs75557232	2	A	G	25600	0.187444811855296	0.0197454072038189	70914984	3.6218e-09	0.0317659998399024
gene	SNP	chr	effect_allele	other_allele	samplesize	beta	eaf	pos	pval	se
ADIPOR2	rs10773986	12	G	A	31470	0.191557007338586	0.67067533541283	1841324	6.0311e-113	0.0084814153921138
ADIPOR2	rs11061988	12	G	T	27425	0.101955150949296	0.906333096968623	1933553	3.471e-12	0.0146546241231093
ADIPOR2	rs17800972	12	A	G	29977	0.144038539557637	0.838170887083931	1921974	1.4089e-38	0.0110891001414742
ADIPOR2	rs34971659	12	A	G	24690	0.218340828945073	0.0169196631196732	1827889	3.9145e-10	0.0348926614374867
ADIPOR2	rs61912267	12	T	C	23110	0.241799371579358	0.0244169096209913	1773901	1.0303e-15	0.0301375226317875
ADIPOR2	rs7311218	12	A	G	31141	-0.131413	0.13820395738204	1778134	1.064e-29	0.0116106420899886
ADIPOR2	rs74059368	12	T	C	27011	0.135719599006802	0.919909706546275	1906764	1.1073e-17	0.0158508343560494
gene	SNP	chr	effect_allele	other_allele	samplesize	beta	eaf	pos	pval	se
ADORA2B	rs11078324	17	C	T	22828	-0.176313	0.026809181706676	15928222	1.162e-09	0.0289741223476533
ADORA2B	rs11078338	17	T	G	25587	0.275794885763852	0.0326142181576582	16210192	1.5375e-28	0.0248869675564526
ADORA2B	rs112242506	17	C	A	20544	-0.342757	0.0212227414330218	15984248	1.3283e-23	0.0342294422377904
ADORA2B	rs112715129	17	A	G	26164	0.185891548387116	0.0967550833205932	16315271	3.0562e-36	0.0147874494576455
ADORA2B	rs11657857	17	A	G	23459	-0.239897	0.143100728931327	15959537	5.5314e-74	0.0131839165327451
ADORA2B	rs116847886	17	C	T	24684	-0.162351	0.0449076324744774	15948768	7.9709e-14	0.0217317382855542
ADORA2B	rs117089340	17	C	T	25528	0.128927720713206	0.0394077091820746	15405657	1.4447e-08	0.0227465985732544
ADORA2B	rs118023219	17	C	T	21242	0.318052704613985	0.0429338103756708	15977214	2.6957e-40	0.0239340721525796
ADORA2B	rs12325871	17	G	A	14625	-0.239917	0.0192478632478632	15741651	1.7244e-08	0.0425565262873322
ADORA2B	rs12453841	17	T	C	26280	0.118642238658506	0.144330289193303	16386845	1.1936e-21	0.0124119638296532
ADORA2B	rs137897693	17	A	G	22150	-0.121361	0.116320541760722	16308654	2.621e-16	0.0148191245773573
ADORA2B	rs142477515	17	T	G	3303	0.670799110661463	0.0133212231304874	15986887	4.094e-10	0.107317555220533
ADORA2B	rs142981177	17	T	C	20056	0.255826861580888	0.0281461906661348	16122620	2.3711e-17	0.0301892663033111
ADORA2B	rs145557673	17	G	A	18778	0.492472692920138	0.0165619341782937	16041778	3.9728e-34	0.0404325656538237
ADORA2B	rs146367145	17	T	C	17325	0.25874562179415	0.018008658008658	16196576	1.5037e-10	0.0403974429030679
ADORA2B	rs148667539	17	T	C	3311	0.556728760724133	0.0147991543340381	16084016	4.4902e-08	0.101771124730209
ADORA2B	rs1759083	17	A	G	19200	-0.215476	0.0500260416666667	15815903	3.4167e-20	0.023408870953962
ADORA2B	rs187783402	17	A	G	16066	-0.139355	0.0521287190339848	15526176	2.8113e-08	0.02509677469343
ADORA2B	rs188416601	17	C	A	3697	0.83465425780482	0.0117662969975656	15818826	1.002e-14	0.107847614456897
ADORA2B	rs188969848	17	T	G	19542	-0.29668	0.0170913928973493	15766803	2.9114e-14	0.0390261041934167
ADORA2B	rs191338697	17	A	G	23643	-0.204423	0.0200482172313158	16111951	4.6406e-10	0.0328090365738839
ADORA2B	rs1974600	17	C	A	25827	-0.107034	0.406841677314438	16380386	6.4769e-33	0.00895674043518003
ADORA2B	rs2324082	17	G	A	25001	0.359129907932431	0.53301867925283	15868291	1e-200	0.00896365934273047
ADORA2B	rs56906221	17	G	T	21626	-0.140134	0.442291685933598	16324709	1.7534e-47	0.00968141764723409
ADORA2B	rs71358386	17	C	T	21286	-0.229153	0.0551066428638542	15951154	3.8714e-27	0.0212395151329855
ADORA2B	rs7226096	17	C	T	21527	0.0644101244622588	0.28652390021833	15517998	1.5165e-09	0.010659163033455
ADORA2B	rs72821769	17	A	G	21301	-0.209543	0.0837988826815642	15931693	4.3101e-33	0.0174851951352316
ADORA2B	rs72838726	17	C	A	21542	0.255371538481648	0.0239532076873085	16181246	5.2832e-16	0.0315082898594243
ADORA2B	rs758857	17	G	A	26271	0.193923913069569	0.827947166076663	15854257	3.5955e-63	0.01155884587143
ADORA2B	rs76275417	17	T	C	22152	0.329667773754395	0.0354595521849043	16009915	1.0741e-37	0.0256892653846282
ADORA2B	rs79727018	17	A	G	19106	-0.295976	0.0191562859834607	15798787	2.1774e-15	0.0373202507367965
ADORA2B	rs9896730	17	G	C	26607	0.189217759837279	0.136317510429586	16308930	1.038e-50	0.0126338049313471
ADORA2B	rs9913313	17	T	C	18705	0.077587810406827	0.295589414595028	15740146	7.5099e-12	0.011330492049422
gene	SNP	chr	effect_allele	other_allele	samplesize	beta	eaf	pos	pval	se
ADTRP	rs10485419	6	G	A	8269	-0.12322	0.841076864535769	11834552	6.8893e-09	0.0212690014208892
ADTRP	rs12199398	6	C	T	5502	-0.10622	0.484620847902098	11790635	2.5679e-08	0.0190748108130419
ADTRP	rs13215825	6	C	A	8269	0.323357233322443	0.0693741979316072	11731887	4.2838e-26	0.0306035617378803
ADTRP	rs145813896	6	C	A	4667	-0.544681	0.0278755008306459	11671996	4.6032e-18	0.0628772903930522
ADTRP	rs210920	6	A	G	8269	-0.347487	0.119634703196347	11710554	1.1699e-47	0.0239606425664246
ADTRP	rs4713857	6	G	A	8268	-0.230488	0.155084936861094	11761459	7.4397e-27	0.0214829260265247
ADTRP	rs6929400	6	C	T	8184	-0.122297	0.365423767154275	11774792	4.8983e-14	0.0162316210715096
ADTRP	rs72819619	6	A	G	8268	0.182788283566283	0.0748877061865398	11670662	6.1398e-10	0.0295448832298253
ADTRP	rs72821888	6	T	C	5414	-0.392567	0.0299695459579181	11874083	3.2794e-12	0.0563628714145379
ADTRP	rs75743169	6	A	G	8090	-0.681656	0.958354239839438	11736202	3.1989e-67	0.0393515923144874
ADTRP	rs76233944	6	T	C	8267	-0.269964	0.0316669378457533	11751769	1.2109e-09	0.0444115180594773
ADTRP	rs77296737	6	C	T	4339	0.39331947356038	0.0491359618631443	11692625	2.3828e-15	0.0496628038031743
ADTRP	rs9368883	6	A	G	8269	0.0936397513233194	0.4689202901274	11786165	1.8644e-09	0.0155822130867174
ADTRP	rs9469930	6	G	A	8269	-0.333173	0.676945723560051	11721221	2.6315e-89	0.0166281462068373
ADTRP	rs9469947	6	C	A	8267	0.201952685137331	0.167767627963159	11730720	2.9219e-22	0.0208129983033774
gene	SNP	chr	effect_allele	other_allele	samplesize	beta	eaf	pos	pval	se
AFAP1L2	rs10787533	10	T	A	31565	0.0546925878175804	0.511891279728199	116288063	6.4744e-12	0.00796223435981662
AFAP1L2	rs11196630	10	T	C	31684	0.0583141207254975	0.617854861137209	115850706	9.8347e-13	0.00817537337205028
AFAP1L2	rs1889451	10	C	G	31236	0.094847831691058	0.824547991284737	116077595	1.9366e-19	0.0105188958168614
AFAP1L2	rs2475245	10	G	T	30971	0.0820818063049272	0.133437596540006	116135410	3.7419e-12	0.0118159422898538
AFAP1L2	rs472079	10	A	G	29777	0.177044388035044	0.0209497206703911	116051762	6.1087e-10	0.028612309587576
AFAP1L2	rs475150	10	A	C	31684	0.101509039539969	0.0888233304521027	116156803	3.6109e-13	0.0139636893238831
AFAP1L2	rs493236	10	C	T	31225	0.117575058563152	0.864474187380497	116074730	8.574e-24	0.0116908679092326
AFAP1L2	rs537432	10	A	G	31684	-0.142882	0.450148446014506	116152354	1.3086e-71	0.00798480645832406
AFAP1L2	rs60696668	10	C	A	31355	-0.111354	0.0938356164383562	116170345	4.2436e-16	0.0136944391222074
AFAP1L2	rs7089842	10	A	G	27425	0.0996440297751074	0.925548098434004	116040170	9.0116e-10	0.0162657573906476
AFAP1L2	rs72826940	10	T	C	21750	0.231973404216588	0.0173013493253373	116151589	2.8157e-10	0.0367709799664882
AFAP1L2	rs75326452	10	T	C	26298	0.237549030619034	0.0200961221316496	116106412	2.0895e-14	0.0310724696689384
gene	SNP	chr	effect_allele	other_allele	samplesize	beta	eaf	pos	pval	se
AGPAT9	rs111297501	4	A	G	28306	0.213446012139458	0.0311867762903018	84379990	1.0695e-18	0.0241791193787122
AGPAT9	rs113557440	4	T	C	24365	-0.177327	0.0222913426645931	84784308	7.5146e-09	0.0306851994127833
AGPAT9	rs115874018	4	A	G	24996	-0.260007	0.0268560815220119	84277851	5.5504e-21	0.0276655866850146
AGPAT9	rs11729350	4	G	A	31684	-0.0628348	0.2557781201849	84288328	5.1565e-12	0.00910504480517825
AGPAT9	rs11731267	4	T	C	31355	-0.376718	0.869729832572298	84469852	1e-200	0.0118636118852386
AGPAT9	rs138248836	4	C	T	28306	-0.174292	0.0352761396409969	84631193	2.0067e-14	0.0227826225181562
AGPAT9	rs1458650	4	G	T	31684	0.104357021593883	0.525799541508512	84566027	2.6245e-39	0.00795561785063224
AGPAT9	rs148981445	4	T	C	28403	0.240355933367735	0.0267061042524005	84459632	2.5636e-20	0.0260240943890401
AGPAT9	rs17355342	4	T	C	30544	0.270439041321826	0.046036357925321	84517090	1.4045e-44	0.019306593657859
AGPAT9	rs34692276	4	A	T	30817	0.0474162354370046	0.628700178696294	84797532	1.2899e-08	0.00833692051639642
AGPAT9	rs62304047	4	C	T	30902	0.115384867782969	0.114899136562512	84615596	5.8212e-20	0.0126135386799927
AGPAT9	rs62304049	4	C	T	30077	-0.0948466	0.12117030637549	84619953	3.1696e-14	0.0124944539320784
AGPAT9	rs62305329	4	G	A	24651	0.217309858131063	0.0200500612995505	84482660	1.3479e-11	0.0321297934695148
AGPAT9	rs6824732	4	A	T	29973	0.224328207718093	0.327737167643987	84487557	1.456e-146	0.00870136720808094
AGPAT9	rs6854239	4	C	T	31684	-0.161533	0.867356909316397	84605292	2.8318e-43	0.0117118030980724
AGPAT9	rs72650564	4	T	C	22321	-0.196721	0.019134871854343	84146039	1.2381e-08	0.0345470327763081
AGPAT9	rs77206416	4	T	C	28021	-0.159888	0.0347990935239257	84748907	4.0051e-12	0.0230489083461351
AGPAT9	rs78360777	4	A	G	31240	-0.125021	0.0744506019491687	84290875	2.3368e-16	0.0152403724814549
gene	SNP	chr	effect_allele	other_allele	samplesize	beta	eaf	pos	pval	se
AGTRAP	rs11121824	1	A	G	16713	-0.104752	0.781105000859254	11822734	2.3904e-15	0.013227725274842
AGTRAP	rs12132907	1	A	G	27270	0.0826715117721132	0.381279567470151	11766889	6.7748e-21	0.00881603768337847
AGTRAP	rs17875905	1	C	T	17894	-0.230786	0.0194632966690069	11795368	1.6234e-09	0.0382640695339349
AGTRAP	rs17875954	1	T	C	27398	-0.308118	0.852304797742239	11809161	1.9612e-144	0.0120405107832984
AGTRAP	rs2236797	1	T	C	26101	-0.108259	0.112332860809931	11892650	5.6826e-15	0.013860469698341
AGTRAP	rs35307526	1	A	G	19008	-0.111263	0.252781167013565	11776196	4.1719e-21	0.0118010466886897
AGTRAP	rs4846028	1	T	C	23257	0.0884646424048839	0.273347266527335	11779499	1.8443e-17	0.0104036883061534
AGTRAP	rs6661241	1	T	A	31237	0.282031856332833	0.179840990749943	11815364	2.0369e-161	0.0104173431511058
AGTRAP	rs6668392	1	T	C	18020	-0.220864	0.0218617226728467	11796240	8.7e-10	0.0360217901010701
AGTRAP	rs72636885	1	A	G	17609	-0.198913	0.032072762087123	11674150	4.7939e-11	0.0302432262503242
AGTRAP	rs7417320	1	G	A	23239	-0.0692585	0.53454635542832	11740358	9.4766e-14	0.00929919554345313
gene	SNP	chr	effect_allele	other_allele	samplesize	beta	eaf	pos	pval	se
AHNAK	rs11230948	11	C	A	30040	0.053232671925708	0.336228142236827	61940073	7.093e-10	0.00863591958691585
AHNAK	rs117111740	11	C	T	28153	0.205352290823473	0.0212304653958441	62201239	2.156e-12	0.0292349720713353
AHNAK	rs12366127	11	T	C	21637	-0.0933047	0.0892511805711716	62293822	3.1301e-08	0.0168608780170397
AHNAK	rs17636205	11	G	A	30642	0.0896403875093554	0.0979361742786165	62032418	4.2297e-11	0.0135905254115278
AHNAK	rs2513059	11	C	T	31086	0.150322485086599	0.72334548461047	62193981	4.2402e-63	0.00896521712420001
AHNAK	rs2849031	11	G	A	31086	0.111640476708229	0.328535457927769	62365665	4.6119e-39	0.0085388604225226
AHNAK	rs3017092	11	T	C	26497	0.109130047594163	0.681417958360084	62218835	1.2016e-31	0.00932329049680592
AHNAK	rs9645690	11	T	C	30268	0.0710146112118764	0.636113372882013	62206288	4.2351e-17	0.00844778454395827
gene	SNP	chr	effect_allele	other_allele	samplesize	beta	eaf	pos	pval	se
AHRR	rs111730658	5	T	C	22191	-0.0705865	0.193338930870417	489133	4.285e-09	0.012019637231683
AHRR	rs112317010	5	A	G	23250	0.366660911018115	0.0192348340731346	387819	1.7953e-27	0.0337634475186345
AHRR	rs114362255	5	T	C	18894	0.254728808584744	0.0209706205381658	195622	1.2935e-12	0.0359020744717826
AHRR	rs114742264	5	T	G	26220	0.0996216313145831	0.0641728327395634	144085	2.2655e-08	0.0178194883044008
AHRR	rs11960768	5	T	C	30811	-0.0722464	0.111648102699641	398848	1.6214e-08	0.0127912773117728
AHRR	rs150064799	5	T	C	12284	0.308977497865432	0.0206710228700679	287286	5.5558e-12	0.0448404344854485
AHRR	rs2244029	5	T	C	30935	0.147334182617925	0.298019467097599	311478	4.6279e-63	0.00878972101454621
AHRR	rs2672777	5	T	C	26650	0.0658021224974295	0.300080630711342	423385	3.35e-12	0.00945134045236125
AHRR	rs34750238	5	C	T	20164	-0.167698	0.0974554868038894	269981	1.7202e-23	0.0167903285729498
AHRR	rs77045859	5	C	A	23340	0.148823118206062	0.0505680025244557	502534	1.8493e-12	0.0211234448301107
AHRR	rs9654453	5	C	T	30925	0.0717956480739689	0.894093762923418	299621	3.9204e-08	0.013067058836992
gene	SNP	chr	effect_allele	other_allele	samplesize	beta	eaf	pos	pval	se
AIM2	rs10908701	1	T	G	11382	-0.136424	0.416759156492786	159045401	3.3753e-24	0.0134434015685218
AIM2	rs1101992	1	T	C	30037	0.0583135235763368	0.260699144068474	158996181	3.5053e-10	0.00929343611269651
AIM2	rs11590737	1	G	A	31644	-0.135869	0.0882596114096734	158943821	3.1294e-22	0.0140127286401346
AIM2	rs71632651	1	G	A	31315	-0.119299	0.0715182648401826	158967345	1.4305e-14	0.0155064944180066
AIM2	rs7535856	1	T	G	31641	-0.156573	0.797714801172668	158992086	2.1871e-56	0.00989587095533147
AIM2	rs76576833	1	T	C	31140	-0.394511	0.0619421566749665	159062973	1.6699e-124	0.0166233185528979
AIM2	rs77184573	1	C	T	23964	0.214019300687831	0.0144263857271428	159051634	2.3129e-08	0.0383073440884624
AIM2	rs78167611	1	C	T	30037	0.084122390876391	0.0816134709223262	159072948	1.6537e-08	0.0149026344381362
AIM2	rs78937012	1	T	C	28262	-0.122216	0.0394799156154475	159189978	1.5279e-08	0.0215994266501852
AIM2	rs860635	1	C	G	31522	-0.0682683	0.159549967908785	158974284	3.4517e-10	0.0108761154800313
AIM2	rs863025	1	A	G	30366	0.0656822173333104	0.173404129327701	159101523	8.8991e-10	0.0107180276970906
gene	SNP	chr	effect_allele	other_allele	samplesize	beta	eaf	pos	pval	se
AKAP3	rs12815495	12	G	C	31568	-0.0589809	0.316045747933416	4936912	5.5636e-12	0.00855998424664868
AKAP3	rs17774188	12	A	G	29002	-0.0879928	0.891252559869603	4714035	4.1787e-11	0.0133370909144443
AKAP3	rs2240766	12	C	T	31684	-0.0477043	0.499906046826262	4677255	1.9204e-09	0.00794502015359654
AKAP3	rs2909375	12	A	C	31017	-0.0545412	0.211992136304063	4561875	2.821e-08	0.00982335763999578
AKAP3	rs34776842	12	G	A	26684	0.098159969744045	0.0964644361145819	4853806	2.1626e-11	0.0146623403205588
AKAP3	rs4147687	12	C	T	30077	0.0848298767945608	0.152647788176946	4772319	7.2866e-14	0.0113368004590002
AKAP3	rs61909646	12	G	C	29143	-0.170722	0.0267990693036397	4704457	2.8062e-11	0.025648192248407
AKAP3	rs720673	12	T	A	31565	0.0728586437251288	0.446262740656852	4723669	9.0332e-20	0.00800635638346049
AKAP3	rs979877	12	T	C	31684	-0.184415	0.48040136795821	4757896	5.2589e-119	0.00795113052120884
gene	SNP	chr	effect_allele	other_allele	samplesize	beta	eaf	pos	pval	se
AKR1C1	rs10795254	10	T	C	14263	0.100383177948246	0.126997716894977	5236360	1.6499e-08	0.0177817260284211
AKR1C1	rs111970989	10	T	G	14262	-0.12924	0.119649136217704	5003078	1.3985e-12	0.0182436656739415
AKR1C1	rs12360243	10	T	C	14263	-0.111147	0.217503805175038	5024234	9.5883e-15	0.0143517550796123
AKR1C1	rs12776076	10	G	A	14250	-0.178578	0.0703289154679166	5342681	1.2701e-14	0.0231657277550512
AKR1C1	rs1937878	10	T	C	14263	-0.0780958	0.558664361682138	5117327	5.7691e-11	0.0119239343950813
AKR1C1	rs2961585	10	T	C	13925	0.29438889687998	0.0397162284321817	4880374	8.4571e-22	0.0306834087467669
AKR1C1	rs3110954	10	T	A	13417	0.099187346487829	0.272158604670117	4855949	4.7804e-13	0.0137160127895774
AKR1C1	rs4339941	10	C	A	14263	-0.287229	0.0486527804318746	4884322	1.6804e-25	0.0275204925314535
AKR1C1	rs4880687	10	A	G	14263	-0.0767231	0.435388127853881	4823414	1.3187e-10	0.011941703031532
AKR1C1	rs4881429	10	C	T	13925	0.137210546219162	0.389929652852118	5335339	5.8483e-29	0.0122858245929659
AKR1C1	rs5011018	10	G	C	14263	0.212872700358663	0.874197931607156	4967006	8.9815e-33	0.0178538048291688
AKR1C1	rs72769970	10	A	G	14263	0.131962525045289	0.216434167781387	5003639	4.3754e-20	0.0143773519687628
AKR1C1	rs76753056	10	T	C	14254	-0.146104	0.0690386134087036	4777253	3.9956e-10	0.0233617171104355
AKR1C1	rs77529416	10	C	T	14260	-0.227398	0.072590691178136	4895923	2.1863e-23	0.0228217554977851
gene	SNP	chr	effect_allele	other_allele	samplesize	beta	eaf	pos	pval	se
AKR1C3	rs10795254	10	T	C	31355	0.114851666475327	0.126997716894977	5236360	1.0049e-21	0.0119929480687642
AKR1C3	rs111495161	10	T	C	21189	-0.312764	0.0215961275909147	5149385	8.0343e-21	0.0334181764585898
AKR1C3	rs112452791	10	G	A	28673	0.235519143303294	0.0292821425544538	5319267	1.9325e-21	0.024768545274198
AKR1C3	rs11253101	10	C	A	31565	0.0944794532796605	0.150302000755002	5373077	2.1908e-17	0.011136979663774
AKR1C3	rs114488149	10	A	G	22280	0.270838471640413	0.0165940133682069	5152587	2.8059e-13	0.0370838885505946
AKR1C3	rs12360243	10	T	C	31355	-0.0760148	0.217503805175038	5024234	4.0555e-15	0.00967959201993708
AKR1C3	rs1344355	10	C	A	31567	-0.334026	0.229503246263023	5338562	1e-200	0.00946430056251027
AKR1C3	rs142509239	10	G	C	28480	-0.272757	0.0298867763298441	5251758	1.4901e-28	0.0246073168141841
AKR1C3	rs149447514	10	T	C	24518	-0.261454	0.0222959419842617	5103330	1.2502e-17	0.0305862236713169
AKR1C3	rs17399851	10	A	G	20449	-0.234199	0.0181475217900351	5329803	2.5787e-10	0.037043940768994
AKR1C3	rs1937865	10	G	T	30902	0.0613257619971077	0.29867967630774	5049637	3.0027e-12	0.00878882181766309
AKR1C3	rs2011131	10	A	G	31231	0.242033206899852	0.382264107661722	5330818	6.4756e-190	0.00823396237050645
AKR1C3	rs35983920	10	T	C	25919	-0.265315	0.0177029360967185	5148012	1.6389e-15	0.0333067155097177
AKR1C3	rs41306310	10	T	C	30868	-0.109733	0.0536385841119684	5140323	8.0977e-10	0.0178633781139759
AKR1C3	rs4457653	10	C	T	31599	0.0579612759602965	0.227887950535364	4943518	9.839e-10	0.0094830379019153
AKR1C3	rs6601900	10	A	G	31684	-0.156435	0.56358750798602	5123136	6.1039e-85	0.0080100593496331
AKR1C3	rs72774292	10	A	G	23228	-0.275285	0.0278466369195174	5303018	1.6292e-22	0.0281984557803189
AKR1C3	rs74342842	10	A	G	26055	0.238904611411272	0.0188989513822688	5328031	1.1193e-13	0.0321709391755124
AKR1C3	rs75935081	10	C	A	31006	-0.146218	0.890054375072307	5166885	4.6684e-30	0.0128370397232112
AKR1C3	rs7918455	10	T	C	30077	0.21268967574762	0.122210223182145	5276783	1.9063e-65	0.0124485485205361
gene	SNP	chr	effect_allele	other_allele	samplesize	beta	eaf	pos	pval	se
AMIGO2	rs10748462	12	A	G	27979	0.0523198033966708	0.651305448829899	47505609	3.6793e-09	0.00887061992788708
AMIGO2	rs11183802	12	A	G	31567	0.0856203754757475	0.905669636116563	47607299	3.2158e-10	0.013616255383303
AMIGO2	rs12301925	12	C	T	31270	-0.165035	0.328230578354648	47473342	1.1341e-83	0.00851572105262735
AMIGO2	rs12369357	12	G	A	31355	0.0958861565517156	0.272374429223744	47488239	1.1386e-26	0.00897004158731062
AMIGO2	rs2079027	12	A	G	31234	-0.0918952	0.0852479070300853	47727838	1.4194e-10	0.0143277379790087
AMIGO2	rs215379	12	T	C	31567	0.0904959076220674	0.529952438471992	47754636	7.536e-30	0.00797405079145526
AMIGO2	rs2465229	12	A	C	31569	0.0461537562621404	0.364101305956066	47330018	2.4024e-08	0.00827083781555479
AMIGO2	rs4768144	12	C	T	31562	-0.0886775	0.301355381885453	47609058	1.561e-24	0.00867431341020774
AMIGO2	rs61927458	12	A	G	29498	-0.115976	0.102587724685747	47294410	1.2589e-17	0.0135689116544208
AMIGO2	rs71445733	12	G	A	31340	0.101346114568352	0.89116695221778	47487620	2.749e-15	0.0128255374743229
AMIGO2	rs73093150	12	G	A	29133	-0.144006	0.0786432787430377	47463206	8.2033e-21	0.0153903213434837
AMIGO2	rs7315480	12	A	T	28047	-0.0521678	0.427629287828661	47005736	9.7898e-10	0.00853432883200937
AMIGO2	rs7958193	12	T	C	31239	0.102639785703506	0.053241094633848	47298154	8.4114e-09	0.0178194072401921
AMIGO2	rs854897	12	T	C	27310	-0.0752214	0.133775579042051	47488722	2.1692e-09	0.0125695728876992
AMIGO2	rs952968	12	C	A	31355	0.0654690813217442	0.634722222222222	47548076	2.9265e-15	0.008293314246123
gene	SNP	chr	effect_allele	other_allele	samplesize	beta	eaf	pos	pval	se
ANK3	rs10740011	10	G	T	31470	0.0658047225277663	0.454470292006464	61890937	2.035e-16	0.0080052459219686
ANK3	rs10821683	10	C	T	31470	0.0884777796780061	0.0977488819572325	61885408	4.3394e-11	0.0134219932763966
ANK3	rs10821767	10	A	T	31353	0.151316340549397	0.882983542201419	62212557	3.9826e-34	0.0124235488718531
ANK3	rs10821844	10	A	G	30603	-0.0533319	0.36166576023619	62601024	2.3036e-10	0.00841250302467791
ANK3	rs10994141	10	C	A	21169	-0.197856	0.0313160183919473	61780382	1.3334e-12	0.0279036169767345
ANK3	rs10994281	10	G	A	29862	-0.119308	0.202871885124595	62010330	9.4454e-32	0.0101753782133598
ANK3	rs10994282	10	G	A	29863	0.0658804758341674	0.144668426525878	62010403	1.484e-08	0.0116322614298622
ANK3	rs10994296	10	G	A	31470	-0.281187	0.0832425119320531	62060128	1.3989e-84	0.0144290191303417
ANK3	rs10994406	10	C	T	27443	0.184905308530891	0.0242533977110157	62291122	2.6684e-11	0.0277468950376488
ANK3	rs10994453	10	T	G	29507	0.205169304983105	0.0388095431307312	62403707	6.1979e-22	0.0213131913262596
ANK3	rs112686360	10	C	T	29498	0.178388265740184	0.0368145472257174	61646524	3.3781e-16	0.021863718515545
ANK3	rs114768836	10	G	T	31025	0.550813560201246	0.0435139886867451	62479217	2.0561e-172	0.0196777459104394
ANK3	rs117026052	10	A	G	8466	-0.845228	0.0129755234444117	62154377	1.4557e-35	0.0679077694373969
ANK3	rs117717606	10	A	G	11540	-0.337338	0.0129576306046894	62890958	6.7996e-09	0.0582038084232618
ANK3	rs117908493	10	G	A	27917	-0.196117	0.0195393823733518	62349404	1.4156e-10	0.0305759624237699
ANK3	rs11817236	10	G	A	31469	-0.344128	0.52076443174985	62501766	1e-200	0.00797899792558692
ANK3	rs1183347	10	T	C	31349	0.0614011206963112	0.274218514044095	61667592	6.9441e-12	0.00895203614228393
ANK3	rs12784166	10	G	A	28929	-0.279696	0.0384327738075453	62435322	2.9163e-38	0.0216260697911888
ANK3	rs138052944	10	G	A	24034	-0.316261	0.0150732801335211	61989897	2.9482e-17	0.0374339907552602
ANK3	rs140656002	10	C	T	28057	-0.19122	0.0306733919641317	62246067	5.6826e-15	0.02448208586422
ANK3	rs141837303	10	A	G	30190	0.255891530533537	0.0343677207943464	62454174	2.2299e-30	0.0223394353875298
ANK3	rs146953336	10	T	G	11033	-0.368856	0.012670107930549	62858256	8.8767e-10	0.0601889674451926
ANK3	rs149297290	10	C	T	30254	-0.179708	0.0341235773638404	61672360	1.012e-15	0.0223926525348273
ANK3	rs16915196	10	G	A	31349	-0.489452	0.138477801268499	62359859	1e-200	0.0115624492740554
ANK3	rs2279942	10	T	C	31470	-0.131401	0.70972227441843	62634621	1.2812e-50	0.0087818407450934
ANK3	rs3213017	10	T	G	28448	-0.280112	0.022893967015729	62538369	1.629e-23	0.0280303008284913
ANK3	rs3213025	10	C	T	31017	0.120067533837739	0.146161492582964	62539191	4.3668e-26	0.0113652960733917
ANK3	rs3213056	10	A	G	26546	0.151808464456146	0.0458611943739912	62548390	2.5358e-13	0.0207470807363773
ANK3	rs3793860	10	A	G	31469	-0.190866	0.0538184004810583	61944987	3.2454e-27	0.0176640745471554
ANK3	rs41274674	10	A	G	29447	-0.177925	0.0388025705686163	61832626	7.4921e-17	0.0213367331128747
ANK3	rs4542352	10	T	C	31344	-0.0969988	0.397405883019295	61909731	1.4197e-32	0.00816165444257834
ANK3	rs55683151	10	C	T	24841	-0.430328	0.0175175175175175	62192515	2.5991e-36	0.0341980841531159
ANK3	rs55838521	10	G	A	31017	0.129085815107171	0.139776724269766	62617045	7.2905e-29	0.0115787608294542
ANK3	rs56068978	10	C	G	31355	-0.1155	0.332735713746509	62582235	2.7072e-42	0.00847486814993493
ANK3	rs57450815	10	C	T	31022	-0.219579	0.143400481632965	62617192	6.693e-82	0.0114547571830656
ANK3	rs61856263	10	T	C	31470	-0.232373	0.10270960953061	62533451	4.3446e-70	0.0131299956823095
ANK3	rs6479688	10	G	A	31344	-0.0650898	0.375712721368425	61774465	2.9548e-15	0.00824684059603566
ANK3	rs6479706	10	G	A	31470	0.154689180018348	0.313690856477132	62008708	1.7293e-72	0.00859064570511798
ANK3	rs7073658	10	T	G	31346	-0.0839489	0.413838021521616	62175024	4.0727e-25	0.00810904892644562
ANK3	rs72811877	10	G	A	25633	0.169632027172577	0.058155208935105	62570866	2.4994e-19	0.0188712775948755
ANK3	rs73261169	10	G	T	30307	0.0778274256828466	0.17710052660536	61894916	2.5815e-13	0.0106397202497466
ANK3	rs75026145	10	T	C	24802	-0.231162	0.0236477923657931	62378618	5.1579e-15	0.0295490207186275
ANK3	rs75686970	10	T	C	28056	-0.183059	0.0264927786160811	61908782	3.3074e-12	0.0262868642174771
ANK3	rs76667912	10	T	C	30688	0.0770740058855386	0.825725016455647	62009709	4.3822e-13	0.0106405839640968
ANK3	rs76932066	10	A	G	30333	0.0765527691994431	0.097911432160804	61460687	2.0994e-08	0.0136611112656714
ANK3	rs78581455	10	C	T	27831	-0.655893	0.0324118415324336	62519969	2.471e-165	0.0239344510249898
ANK3	rs78839797	10	C	T	31141	-0.187877	0.110844748858447	62626647	4.8108e-49	0.0127635758676979
ANK3	rs7893795	10	T	C	24755	0.144945027373335	0.0514225394591334	62623288	1.056e-12	0.0203488737011561
ANK3	rs7905531	10	T	C	31470	0.313827363908407	0.376489157803751	62379525	1e-200	0.00822694111639679
ANK3	rs79102984	10	T	C	29284	0.179102672838151	0.0581214429021824	62404229	3.6188e-24	0.0176605471471544
ANK3	rs7910802	10	A	G	29170	-0.241456	0.0375786745649759	62463705	1.3842e-28	0.0217702511764081
ANK3	rs79217840	10	A	G	28240	-0.154787	0.051456435262415	62562475	4.4005e-16	0.0190460169634462
ANK3	rs79867207	10	C	T	30333	-0.358159	0.0368247487437186	61930727	5.5187e-62	0.0215578162578017
ANK3	rs80263212	10	A	T	29441	-0.174696	0.0446908055329536	61852047	1.9699e-18	0.0199447066649537
ANK3	rs9415604	10	A	G	28925	0.128793542761989	0.0421791888297872	62362777	4.7727e-10	0.0206850736801344
gene	SNP	chr	effect_allele	other_allele	samplesize	beta	eaf	pos	pval	se
ANKLE2	rs1026	12	C	A	21003	-0.124906	0.39151032426107	133683750	7.9496e-36	0.00999645739800385
ANKLE2	rs10781647	12	T	C	20454	-0.242386	0.25786369593709	133361766	4.9552e-102	0.0113020945534769
ANKLE2	rs10870540	12	T	C	13928	-0.191436	0.0832430675909879	133053603	1.0791e-18	0.0216889977517544
ANKLE2	rs111454116	12	C	T	15092	0.292523986426113	0.0258777314019151	133204740	7.0992e-16	0.0362528177501689
ANKLE2	rs11146932	12	T	C	14231	0.0918966938689598	0.71251077640854	133139416	2.2701e-12	0.0130966671230418
ANKLE2	rs11147013	12	T	G	16662	-0.205941	0.155417607223476	133294231	3.0208e-42	0.0151199486507221
ANKLE2	rs11147015	12	C	T	19429	-0.122906	0.157001244130513	133295501	1.2054e-18	0.0139442372787779
ANKLE2	rs11147040	12	T	G	20733	0.239150157034983	0.0732681336593317	133318406	6.753e-37	0.0188460055820849
ANKLE2	rs11147041	12	T	G	20707	0.094467160294258	0.353181427343078	133318660	3.9873e-20	0.0102810208732936
ANKLE2	rs11778	12	C	T	13454	-0.123442	0.406016713091922	133088370	2.6731e-23	0.0124136707499932
ANKLE2	rs117856966	12	G	A	20533	0.292233940513504	0.0283116059753536	133320632	9.0171e-23	0.0297517857665646
ANKLE2	rs12319441	12	T	C	17175	-0.0756242	0.809248554913295	133460032	3.65e-08	0.0137328837790553
ANKLE2	rs12581095	12	C	T	18421	-0.183831	0.0491453893226419	133355822	2.3879e-14	0.024100716418404
ANKLE2	rs1278605	12	C	T	19514	0.169412210725517	0.0559555235581154	133493229	1.4463e-14	0.0220238957288574
ANKLE2	rs13254	12	A	G	21121	0.325151736834779	0.261302566800707	133346212	1.7602e-189	0.0110744618393685
ANKLE2	rs13273	12	A	G	21121	-0.0858302	0.188883460483295	133498344	5.0274e-12	0.0124305163723736
ANKLE2	rs141023897	12	A	C	14795	-0.31558	0.0250127746550843	133348472	2.2989e-17	0.0372260639825731
ANKLE2	rs141686143	12	G	C	19080	0.275136045351663	0.0420407493953183	133386497	4.0086e-27	0.0255086264928298
ANKLE2	rs145991281	12	A	G	12850	-0.308047	0.0165464716586911	133158549	2.9841e-10	0.0488994322843239
ANKLE2	rs34590303	12	C	T	13408	-0.340045	0.020559799474815	133302677	2.7446e-15	0.0430332950855103
ANKLE2	rs73157021	12	T	C	10247	-0.268592	0.0258023514458214	133319194	1.0848e-09	0.044058879944828
ANKLE2	rs78695880	12	T	C	16747	0.21978430688274	0.0995186412969438	133336140	2.1579e-33	0.0182526913333173
ANKLE2	rs79091287	12	A	G	20598	0.11269035748078	0.0815869707846089	133415738	3.8252e-10	0.0179987793452771
ANKLE2	rs9737965	12	T	G	10726	0.232979065081703	0.0540658791174448	133106090	1.1929e-14	0.0301907586053601
gene	SNP	chr	effect_allele	other_allele	samplesize	beta	eaf	pos	pval	se
ANKRD10-IT1	rs118022676	13	C	T	5491	0.337272436441887	0.0522889114954222	111509690	3.6036e-15	0.0428663493189993
ANKRD10-IT1	rs67298778	13	A	G	5502	0.118781819658328	0.292732115677321	111608726	1.4313e-08	0.0209506525430944
ANKRD10-IT1	rs67357970	13	G	T	5499	-0.170043	0.114586085840474	111549458	1.3454e-08	0.0299367071356908
ANKRD10-IT1	rs77678355	13	A	G	5164	-0.258976	0.879873775506253	111544378	1.1625e-17	0.0302665405840087
ANKRD10-IT1	rs9521984	13	C	G	5502	0.338074413581157	0.317656827961048	111549982	3.0781e-61	0.0204759559549602
gene	SNP	chr	effect_allele	other_allele	samplesize	beta	eaf	pos	pval	se
ANKRD10	rs113409052	13	G	T	30688	0.0972697566542233	0.119951988229372	111986090	4.902e-15	0.0124234953259114
ANKRD10	rs113641136	13	T	C	30333	0.323603226937176	0.0540201005025126	111596594	1.4125e-72	0.0179600967336469
ANKRD10	rs11616301	13	T	C	31411	-0.160345	0.735555555555556	111601705	2.6891e-70	0.00904626190047443
ANKRD10	rs117014700	13	T	G	27808	0.291028344904588	0.0201551401054604	111597834	5.1611e-22	0.0301736990704697
ANKRD10	rs117282809	13	T	C	24020	-0.286884	0.0506811420220262	111555228	2.8318e-43	0.0208002833115698
ANKRD10	rs117646778	13	T	C	29780	0.128248851259076	0.0323648621533769	112042937	3.0455e-08	0.0231542095468551
ANKRD10	rs1178819	13	C	G	28671	0.0564783501725773	0.27847543049139	112042322	1.3427e-09	0.00931632386595472
ANKRD10	rs143165581	13	C	T	30331	-0.139833	0.0300157047506871	111640656	4.1878e-09	0.0237949619059933
ANKRD10	rs146096254	13	A	G	27038	-0.307291	0.0170446859358795	111480641	2.2533e-20	0.0332228076049632
ANKRD10	rs148019937	13	C	T	23732	-0.26482	0.0175931323194319	111541293	3.3249e-14	0.0349140759961598
ANKRD10	rs2247943	13	T	C	31470	0.129373722426852	0.199969934984404	111969851	1.5479e-38	0.00996554659314379
ANKRD10	rs3783095	13	C	T	31349	-0.142299	0.520952884324977	111642891	7.0669e-71	0.00799438055345961
ANKRD10	rs61969871	13	A	G	28925	-0.153729	0.0242478390957447	111621325	1.2884e-08	0.0270297504886278
ANKRD10	rs61971309	13	T	C	29622	0.308072132294072	0.0261701869876015	111525230	5.0661e-33	0.0257355152408858
ANKRD10	rs71440092	13	T	G	29835	-0.176619	0.0472891807479779	111622269	5.3064e-20	0.0192868160047706
ANKRD10	rs72668159	13	A	G	31350	0.0747482516315159	0.25604968099966	111722117	3.1096e-16	0.0091502327863283
ANKRD10	rs7330975	13	C	T	31466	-0.0632371	0.357658334899455	111807304	2.8756e-14	0.00831662292877758
ANKRD10	rs7336291	13	T	C	25007	0.152534698904933	0.026531321354115	111330522	4.2007e-08	0.0278236290002066
ANKRD10	rs737140	13	G	A	31141	-0.122131	0.453843226788432	111450748	5.1936e-52	0.00804835517745036
ANKRD10	rs75124294	13	G	A	30966	-0.172793	0.0483815361041946	111585079	2.7832e-20	0.0187271285210843
ANKRD10	rs75343180	13	T	C	23074	-0.250987	0.0149452747374854	111665159	6.0702e-11	0.0383655498807903
ANKRD10	rs77220412	13	A	C	30688	-0.234515	0.880067371355558	111560664	1.8106e-79	0.0124243613320294
ANKRD10	rs77267222	13	T	C	31010	-0.173461	0.0867719606868332	111480794	5.0387e-34	0.0142644422449871
ANKRD10	rs78547976	13	C	T	28865	0.180049733033238	0.0426178970171638	111667907	2.3644e-18	0.0206044279311131
ANKRD10	rs79119110	13	A	G	29486	0.128956779836003	0.0346192893401015	111511442	1.0343e-08	0.0225252017180792
ANKRD10	rs7999064	13	A	G	31351	0.0870043801428672	0.15919214798037	111963037	1.5816e-15	0.0109156625778319
ANKRD10	rs9515299	13	T	C	27096	0.0729019544675589	0.245199010568923	111485569	2.8564e-13	0.00998520126935474
ANKRD10	rs9521969	13	G	C	27311	0.203854795827345	0.0418485523385301	111514747	1.4256e-21	0.0213677552935804
ANKRD10	rs9521994	13	G	A	29254	0.13392523988712	0.230393965481901	111577798	2.2966e-42	0.00981799013893028
ANKRD10	rs9555739	13	G	T	30688	0.363115689009534	0.274809308088435	111523068	1e-200	0.00904188292648363
ANKRD10	rs9555767	13	C	T	31470	-0.135043	0.106091923785185	111718343	1.7453e-25	0.0129434198240242
ANKRD10	rs9559900	13	A	G	31470	0.133005320115985	0.160979367883047	111527329	1.431e-34	0.0108458901523244
ANKRD10	rs9588290	13	C	T	30636	-0.126911	0.127487875848691	111527756	1.0972e-25	0.0121129184659764
ANKRD10	rs9634597	13	C	T	31470	0.249717760586729	0.0718741779097298	111492003	6.8893e-59	0.0154328721261938
gene	SNP	chr	effect_allele	other_allele	samplesize	beta	eaf	pos	pval	se
ANKRD16	rs112029025	10	T	C	30400	0.0827145637993089	0.0910957551826259	5915112	4.3949e-09	0.0140941884572919
ANKRD16	rs116879903	10	A	G	30226	-0.151134	0.036201343882947	5735817	3.8878e-12	0.021774047124355
ANKRD16	rs36049919	10	T	C	31048	-0.0537724	0.357390366919493	5939358	1.3485e-10	0.00837381091983309
gene	SNP	chr	effect_allele	other_allele	samplesize	beta	eaf	pos	pval	se
ANKRD22	rs10736363	10	A	G	31470	-0.124293	0.447874779210042	90590746	3.14e-54	0.00801566455411041
ANKRD22	rs10887856	10	C	G	31339	0.0886498552039749	0.245902258478737	90556678	1.2122e-21	0.00927571414263329
ANKRD22	rs11202881	10	C	A	21533	-0.204925	0.027342325920525	90651701	4.0507e-12	0.0295484697913478
ANKRD22	rs1411780	10	T	C	31355	-0.139372	0.258473616667925	90578539	1.0426e-52	0.00912137237453844
ANKRD22	rs17113560	10	A	G	31464	0.11143880692475	0.117355185505394	90600756	2.3197e-19	0.0123860807287626
gene	SNP	chr	effect_allele	other_allele	samplesize	beta	eaf	pos	pval	se
ANKRD36BP2	rs116690611	2	C	T	23754	0.504811426605292	0.0398678688660822	88990958	8.6611e-103	0.0234498254126292
ANKRD36BP2	rs13405334	2	G	A	13107	0.106524521289791	0.448619115335678	89151470	9.6705e-18	0.0124184848610722
ANKRD36BP2	rs335127	2	C	T	26177	0.0730451321084852	0.319206915993234	89100215	6.6376e-15	0.00937521750009436
ANKRD36BP2	rs4449134	2	G	A	25843	0.0637632087591391	0.323348371310598	88846961	1.1968e-11	0.00940363218534062
ANKRD36BP2	rs76734941	2	C	T	26180	0.0790394284031977	0.108444828622971	88530454	1.8702e-08	0.0140547021361733
gene	SNP	chr	effect_allele	other_allele	samplesize	beta	eaf	pos	pval	se
ANKRD36B	rs10189727	2	C	A	5998	0.174529796837191	0.284938995404849	97386826	6.2216e-18	0.0202271306527427
ANKRD36B	rs10520549	2	G	A	6414	-0.245207	0.169913542492544	98499812	1.8051e-25	0.0235095795845918
ANKRD36B	rs115348870	2	A	G	6418	-0.192471	0.100569811613303	97285604	5.4388e-11	0.0293472625516732
ANKRD36B	rs115715131	2	A	G	3359	0.575349998368647	0.0143645139048495	98264323	2.0116e-08	0.10253599913898
ANKRD36B	rs11683207	2	C	T	6421	-0.204893	0.176413128418859	98333290	8.705e-19	0.0231506670400756
ANKRD36B	rs11690658	2	G	T	6083	0.768075574142098	0.652897278314311	98163203	1e-200	0.0190447227788202
ANKRD36B	rs17022373	2	C	T	6421	0.337218727865706	0.022640683161813	98407168	1.3127e-08	0.0593214523213077
ANKRD36B	rs17424579	2	C	T	5258	-0.247525	0.0746713513086732	98446938	2.5165e-11	0.0370979320776591
ANKRD36B	rs1866445	2	T	C	5173	0.355901244112369	0.0277158567394858	97203224	2.8054e-09	0.0598898199630412
ANKRD36B	rs298900	2	C	G	6418	0.17303417183647	0.666602826828054	98677252	2.4238e-20	0.018722792048872
ANKRD36B	rs35321033	2	C	T	6414	-0.307045	0.18529844829539	98327812	1.3286e-41	0.0227240303880823
ANKRD36B	rs62156200	2	T	C	6083	0.237911493770066	0.73196654663724	97341324	3.1415e-31	0.0204684980831662
ANKRD36B	rs6724669	2	G	C	6420	0.161616081112232	0.111357486470235	98781288	8.3716e-09	0.0280539639834456
ANKRD36B	rs6745657	2	A	G	6408	0.432293242110398	0.856168484070986	97686580	4.1863e-66	0.0251719640675454
ANKRD36B	rs6748809	2	C	T	6421	0.244607987606689	0.646679694840092	98391355	4.512e-40	0.0184609801967313
ANKRD36B	rs72809824	2	T	C	5590	-0.240097	0.0520011340547181	97381556	1.7344e-08	0.0425959964183353
ANKRD36B	rs72811676	2	G	T	6188	0.510339676120045	0.0309711410670211	97599886	7.9252e-23	0.0518875172711143
ANKRD36B	rs72815665	2	C	T	6411	0.479181371664332	0.0261851455271099	98342701	4.539e-18	0.0553039842650277
ANKRD36B	rs74587284	2	G	C	4995	0.544808084191558	0.0148294611962432	98472688	4.6541e-11	0.0827749375841803
ANKRD36B	rs7589018	2	G	A	6421	-0.128275	0.459449810214589	98919219	4.3436e-13	0.0177070664422324
ANKRD36B	rs7594727	2	A	C	6083	0.348623552764598	0.0814115192953992	97489870	7.3213e-26	0.033152987253661
ANKRD36B	rs78381888	2	G	A	6421	-0.240521	0.206983502863493	97500775	2.3699e-28	0.0217808432716894
ANKRD36B	rs80334402	2	A	C	6416	0.43440072698942	0.0470249520153551	98322747	2.0783e-25	0.041701135354653
gene	SNP	chr	effect_allele	other_allele	samplesize	beta	eaf	pos	pval	se
ANKRD36	rs115086514	2	T	C	20820	-0.123073	0.05174954835029	97808825	2.6457e-08	0.0221222771328313
ANKRD36	rs116469288	2	T	C	23244	0.212483978007631	0.036576008184841	98746768	7.9716e-18	0.0247071520107477
ANKRD36	rs11692435	2	A	G	22820	0.266206019636263	0.109512025701137	98275354	1.4527e-70	0.0149893308803788
ANKRD36	rs13001139	2	A	G	26277	-0.190668	0.707259069117814	98299983	5.0675e-88	0.00958663349710409
ANKRD36	rs13383845	2	A	G	26395	-0.0874098	0.202638205118569	97557261	6.8592e-16	0.0108276894831508
ANKRD36	rs146663992	2	A	G	12304	0.266629900122987	0.0216596228868661	97095772	1.1404e-09	0.0437916598434758
ANKRD36	rs148279538	2	A	G	25775	-0.117349	0.0631036207626303	98635741	9.27e-11	0.0181139325164756
ANKRD36	rs182393789	2	A	C	3915	1.06848200701081	0.0251596424010217	98166800	1.32e-49	0.0721606001898297
ANKRD36	rs2100057	2	C	T	17865	-0.255066	0.0144136579904842	98440141	9.1056e-09	0.0443863105330304
ANKRD36	rs3926004	2	A	G	22005	-0.0850248	0.775484945317071	97870317	9.8573e-14	0.0114239132448651
ANKRD36	rs4619651	2	A	G	26278	0.0629341367997381	0.65914238260607	97416153	7.9971e-12	0.00920264623389505
ANKRD36	rs55757705	2	G	A	13921	0.269963257078805	0.0232741900725523	98317446	1.109e-11	0.0397489961392296
ANKRD36	rs62154922	2	T	C	9182	-0.144072	0.110540622168529	98779834	9.2408e-10	0.0235338156132341
ANKRD36	rs72815665	2	C	T	20332	-0.195965	0.0261851455271099	98342701	2.7832e-10	0.0310548372978184
ANKRD36	rs7370560	2	T	C	9186	0.095160385556885	0.589593084704817	98790354	2.2271e-10	0.014998169454811
ANKRD36	rs7590131	2	G	T	26280	-0.0634481	0.495149845247981	98698587	3.5211e-13	0.00872414250630234
ANKRD36	rs7597743	2	G	T	23511	-0.089515	0.760842992623814	97608837	1.2297e-16	0.010810863245829
gene	SNP	chr	effect_allele	other_allele	samplesize	beta	eaf	pos	pval	se
ANKRD37	rs1112943	4	A	G	31569	0.0471595283756548	0.557239374952819	186190562	3.9613e-09	0.00801215228944186
ANKRD37	rs6845326	4	A	G	31684	-0.0663763	0.291837348265624	186313557	3.0542e-14	0.00873832222731575
ANKRD37	rs73873449	4	A	G	31355	-0.116404	0.0439307458143075	186350235	2.3151e-09	0.0194850998373773
gene	SNP	chr	effect_allele	other_allele	samplesize	beta	eaf	pos	pval	se
ANO10	rs10461015	3	G	A	26106	-0.167536	0.41892668352103	43667694	1.4371e-79	0.00887013760485953
ANO10	rs12494982	3	A	G	26491	0.0766647646416876	0.198388131818353	43820013	1.9642e-12	0.0108942142672778
ANO10	rs13065591	3	C	T	26490	-0.067991	0.253661759154398	43996585	9.8007e-12	0.0099850139453513
ANO10	rs13319228	3	C	T	26102	0.186441059121423	0.0340586928204735	43659779	1.1063e-14	0.0241300794824853
ANO10	rs13433902	3	T	C	26494	-0.0711153	0.145240431795878	43237331	8.0218e-09	0.0123295005688938
ANO10	rs141346045	3	A	G	25466	-0.170324	0.024915573706118	43773114	2.0804e-09	0.0284281160004493
ANO10	rs142148000	3	A	G	25652	0.114940953288426	0.930180882582255	43615471	3.2538e-11	0.0173242125926456
ANO10	rs142641363	3	C	A	24065	-0.173779	0.0321628921670476	43637642	1.7367e-11	0.0258352927539853
ANO10	rs17321267	3	C	T	26488	-0.120459	0.0532127755964965	43783761	4.8649e-10	0.0193564748459514
ANO10	rs34402945	3	C	T	26280	0.115633022828643	0.051693302891933	43436520	4.3738e-09	0.0197006598225816
ANO10	rs55734705	3	T	C	24059	0.128502066413848	0.0631572384554637	43313020	7.0617e-12	0.018741368377016
ANO10	rs73087095	3	A	G	24065	-0.139431	0.0368169540826927	43737445	8.3915e-09	0.02420548152004
ANO10	rs78674307	3	G	T	24684	-0.137682	0.0435504780424567	43567237	4.2761e-10	0.0220520893171808
gene	SNP	chr	effect_allele	other_allele	samplesize	beta	eaf	pos	pval	se
ANP32E	rs111310570	1	A	G	7183	0.428838905728916	0.0132827324478178	150036025	3.9998e-09	0.0728772526899797
ANP32E	rs11205354	1	A	C	31684	0.0979611481937686	0.55402307489947	150249101	1.5296e-34	0.00799180500369307
ANP32E	rs12142278	1	G	A	27327	-0.0627252	0.228339025705555	150125249	7.4888e-10	0.0101902698195125
ANP32E	rs3738478	1	T	C	31684	-0.0456275	0.574673982487128	150997940	1.358e-08	0.00803513646961202
ANP32E	rs41305070	1	G	A	31683	0.0634528872892968	0.18751879134095	150666860	4.5293e-10	0.0101775394234268
ANP32E	rs55909843	1	C	A	31233	0.0902232314595738	0.101575043963606	149881173	9.6385e-12	0.0132447491866667
ANP32E	rs76061334	1	T	C	30901	0.0859189593808782	0.0879927205142105	151182876	1.4431e-09	0.014199603255913
ANP32E	rs771203	1	G	A	30847	0.0759111707409546	0.150939003569766	150973514	1.4805e-11	0.0112462659803782
ANP32E	rs78676616	1	G	A	30871	0.21928866079549	0.15762133664134	150143302	1.0016e-87	0.0110445613322399
gene	SNP	chr	effect_allele	other_allele	samplesize	beta	eaf	pos	pval	se
ANXA11	rs10788350	10	T	C	30362	-0.0478652	0.376102345078499	81765502	1.1061e-08	0.008377416675869
ANXA11	rs10788351	10	G	T	28487	0.0744369535293104	0.463223987698616	81765642	8.0302e-19	0.00840174650714024
ANXA11	rs10887949	10	G	A	31684	0.0629983495375714	0.229508812807697	82237126	2.5826e-11	0.00944672947720301
ANXA11	rs11201315	10	T	C	30077	-0.104585	0.134569234461243	81796944	2.0629e-18	0.011947545368356
ANXA11	rs11202031	10	C	G	31569	0.365677546854391	0.86404468936363	81944043	1e-200	0.0116115019307456
ANXA11	rs11591611	10	A	G	31569	-0.333309	0.235392919151506	81936547	1e-200	0.00938077532443631
ANXA11	rs116915903	10	A	G	17110	-0.328914	0.0184046530951392	81915870	2.8812e-16	0.0402188764393201
ANXA11	rs117546928	10	C	T	25783	-0.247755	0.0169982615414333	81925452	3.5263e-13	0.0340673914927342
ANXA11	rs117945051	10	C	T	18241	0.466134593894267	0.0153045723834118	82181072	8.3214e-28	0.0426480442363325
ANXA11	rs12146240	10	T	C	28309	0.190068892196599	0.0316131531376431	82108946	2.5126e-15	0.0240195235996764
ANXA11	rs12773636	10	T	G	31567	0.130699060554734	0.806413256832251	82262407	1.6871e-38	0.0100728347915852
ANXA11	rs143329945	10	C	T	25213	-0.301523	0.0209305790048664	81902532	3.2353e-22	0.0311082353349661
ANXA11	rs143396142	10	C	T	28423	0.29042632318191	0.0214365256124722	82050967	1.1366e-23	0.0289586522267335
ANXA11	rs181173342	10	G	A	16904	0.533534410994465	0.0175839039648322	81968972	4.8906e-38	0.0413794652422861
ANXA11	rs189398755	10	T	C	24454	-0.296561	0.0206150988183085	82003348	1.1722e-20	0.0318229645915891
ANXA11	rs2081814	10	G	A	25488	0.0945741987884154	0.743374320286092	81339086	1.0973e-20	0.0101405915302334
ANXA11	rs2573326	10	C	T	31231	0.133454094565943	0.574724728551766	82013146	4.3872e-61	0.00809332629240258
ANXA11	rs2573361	10	A	G	30631	-0.0722192	0.479867741430584	81890982	4.2447e-19	0.00808698694043581
ANXA11	rs35577915	10	A	G	28242	-0.235567	0.0225536323218371	81956217	9.3628e-17	0.0283388721065255
ANXA11	rs3851050	10	C	T	31684	-0.104141	0.399564057273855	81882370	9.7119e-38	0.00811032862370239
ANXA11	rs41291394	10	G	T	10821	-0.36633	0.0122694048033415	81904863	2.9781e-09	0.0617476313735163
ANXA11	rs41314475	10	T	C	31238	-0.118681	0.0438978710392539	81682640	1.2215e-09	0.0195285285105128
ANXA11	rs4934351	10	A	G	31679	0.0723577286430398	0.323334836866637	82338801	1.6066e-17	0.00849348866595922
ANXA11	rs55897874	10	C	A	30163	-0.131829	0.0580755739795918	82226375	3.6414e-14	0.0174077623921679
ANXA11	rs61861594	10	A	G	24700	-0.323667	0.0332229299363057	82347999	4.9416e-38	0.0251046626453607
ANXA11	rs6421346	10	A	G	25906	-0.0742469	0.120469492583169	81837918	3.7679e-08	0.013496489682187
ANXA11	rs6584460	10	T	G	31228	0.102063271599261	0.701831529843613	81781819	1.853e-31	0.0087471307998887
ANXA11	rs72809515	10	T	C	28620	0.184133693895858	0.0246973879804629	81946397	8.0869e-12	0.0269311551359999
ANXA11	rs74500319	10	A	G	29024	0.156349806899244	0.0308989936949351	82315662	7.1061e-11	0.0239855498809916
ANXA11	rs75841224	10	G	A	27980	0.117501982720077	0.0556647020301244	82160038	1.8561e-10	0.0184377571780629
ANXA11	rs77745801	10	A	G	21658	0.32424620875981	0.0137188687209793	82355312	4.1737e-15	0.0413063019134003
ANXA11	rs78222745	10	G	C	16946	-0.213231	0.0416982562547384	81250910	4.2543e-15	0.0271732331406631
ANXA11	rs7912629	10	C	T	31684	-0.143001	0.136852192867075	82337076	3.6956e-35	0.0115583684289238
ANXA11	rs911887	10	C	T	30729	-0.0880468	0.435312232010603	81701523	2.708e-27	0.00813591050878955
gene	SNP	chr	effect_allele	other_allele	samplesize	beta	eaf	pos	pval	se
AP1S1	rs10953331	7	A	G	31355	0.0792652960002162	0.154242770167428	100932330	7.5437e-13	0.0110562113456287
AP1S1	rs117691349	7	C	A	25365	0.213638920576362	0.0202316412025628	100824062	1.2475e-11	0.0315348163869045
AP1S1	rs2227710	7	G	A	25190	0.213051491390287	0.0211782252050708	100772379	5.7788e-12	0.0309438485120459
AP1S1	rs2239538	7	A	G	28471	0.246570914122413	0.162933834843563	100798728	1.0868e-104	0.0113474455627641
AP1S1	rs2898568	7	G	A	31684	-0.0841532	0.748299447555338	100810983	3.7991e-20	0.00915345821141273
AP1S1	rs4729666	7	T	C	26616	-0.0636121	0.206791699549696	100803161	2.7781e-09	0.0107017162537975
AP1S1	rs67790667	7	A	G	27340	0.112861189452821	0.0706939142151359	100790455	1.3386e-11	0.016684582439362
AP1S1	rs6960098	7	A	G	27069	0.11057063585323	0.0538783304537601	100655364	6.3073e-09	0.0190356774185225
gene	SNP	chr	effect_allele	other_allele	samplesize	beta	eaf	pos	pval	se
APH1B	rs10851733	15	T	C	31563	0.0518326401493167	0.393140289942616	64198577	2.0044e-10	0.00814850497552534
APH1B	rs112568769	15	T	C	31232	-0.113285	0.123771839278205	63223323	1.1182e-20	0.0121497006715514
APH1B	rs11636418	15	A	G	30559	-0.0754407	0.0993760791084602	63195400	2.408e-08	0.0135208117209739
APH1B	rs117202602	15	A	G	25731	0.270301932848176	0.0433772269558482	63744034	8.3807e-36	0.0216399084812284
APH1B	rs117618017	15	T	C	22699	0.544391191426294	0.123496368588289	63569902	1e-200	0.0142651941299583
APH1B	rs12324711	15	T	C	31569	-0.0936038	0.119857326187061	63409679	2.1858e-14	0.0122530937932787
APH1B	rs12901035	15	C	A	30876	0.170520096680814	0.0811790240688345	63541446	5.6737e-31	0.0147345583334037
APH1B	rs12902152	15	T	C	31684	-0.108226	0.77370438573415	63313968	4.1908e-30	0.0094937852110864
APH1B	rs13379607	15	A	G	31569	-0.0522495	0.468502302408092	64146906	5.6924e-11	0.00797531841086298
APH1B	rs1362821	15	C	A	31568	-0.0745042	0.16094817498962	63762434	6.0021e-12	0.0108298900319443
APH1B	rs1463803	15	A	G	31684	-0.0573819	0.191965124581908	63128646	1.2764e-08	0.0100864602070101
APH1B	rs150918979	15	G	A	23857	0.289009467467292	0.0195399850921095	63274322	2.3727e-18	0.0330750134432699
APH1B	rs17823147	15	T	C	31563	0.072667230106348	0.265384324977348	63254009	7.5549e-16	0.00901421962765127
APH1B	rs185606800	15	G	A	7789	-0.357893	0.0186801900115548	63860367	1.4665e-09	0.0591763565572008
APH1B	rs185607147	15	T	C	10617	0.397840808023414	0.0116383976903645	63458975	5.0482e-10	0.0639852048222678
APH1B	rs290564	15	C	T	31566	-0.0791341	0.354780868974369	63705374	1.8489e-21	0.0083184327812244
APH1B	rs34199355	15	T	C	31558	-0.185904	0.862421175848658	63398870	3.1068e-58	0.0115556602282543
APH1B	rs35363782	15	C	T	31270	-0.115762	0.773506394350067	63343746	8.5426e-34	0.00955346979078226
APH1B	rs4984241	15	A	G	31296	-0.155979	0.605335418176271	63623463	4.1529e-81	0.00817764900702615
APH1B	rs4984259	15	C	G	31197	-0.110391	0.0449429599571243	63578001	1.1113e-08	0.0193233800084164
APH1B	rs4984265	15	A	G	31684	-0.072763	0.210060505843887	63627439	8.5608e-14	0.00975204917599926
APH1B	rs4984291	15	A	G	31555	0.0441482954488166	0.4422583081571	63777614	3.6252e-08	0.00801486764497514
APH1B	rs56117020	15	C	T	28673	0.192114627827948	0.0489660140689889	64034592	3.1513e-23	0.0193509833729135
APH1B	rs56351057	15	A	G	24660	0.158890861470773	0.0301250957365331	63836811	1.6255e-09	0.0263430700760615
APH1B	rs68042901	15	C	T	31565	-0.0843405	0.119762174405436	63189003	5.9601e-12	0.0122580744725909
APH1B	rs71393128	15	C	A	24622	-0.221964	0.0200542282703228	63400311	5.0133e-12	0.0321454374319804
APH1B	rs7166997	15	C	T	31569	-0.0986334	0.0717143504189628	63846178	1.6076e-10	0.0154244872816293
APH1B	rs7180358	15	G	A	31553	-0.0949469	0.519374575118967	63945415	9.6522e-33	0.00796747959650676
APH1B	rs72625751	15	T	C	31221	-0.10608	0.946339784288228	63279300	2.3207e-09	0.0177587274208352
APH1B	rs73442943	15	G	A	30842	-0.157333	0.960026390344239	63641276	1.9331e-14	0.020553484807578
APH1B	rs75326529	15	G	A	25882	-0.198198	0.0275388090546451	63303732	1.59e-13	0.0268582287947867
APH1B	rs77053637	15	C	T	23113	-0.175183	0.0219536533983812	63518024	3.4055e-08	0.0317412278984932
APH1B	rs78880342	15	C	T	31239	-0.134997	0.0452339091881975	63341262	2.3426e-12	0.0192511149196635
APH1B	rs881644	15	A	G	31231	-0.0891797	0.115958097568436	63663411	9.5946e-13	0.0124969804650749
gene	SNP	chr	effect_allele	other_allele	samplesize	beta	eaf	pos	pval	se
APIP	rs11032937	11	C	T	11496	-0.504666	0.114554238695554	34961410	3.4391e-131	0.0207073756115259
APIP	rs113435171	11	T	C	10655	-0.300685	0.0288050685133343	34885297	2.1106e-13	0.0409562905476157
APIP	rs117578805	11	A	C	10650	0.397762372160181	0.0169876543209877	34913886	6.3044e-14	0.0530229644160898
APIP	rs138262745	11	G	A	11488	0.319798318035646	0.0237323358270989	34796566	1.602e-13	0.043341914757152
APIP	rs141911828	11	G	A	3481	-0.574219	0.0157882516833062	35204122	2.335e-09	0.096143891741399
APIP	rs2762955	11	T	C	10333	-0.237615	0.0666480869530597	35030285	1.6011e-17	0.0278904314394567
APIP	rs2956084	11	A	T	7656	0.985961851862361	0.795554868897325	34901364	1e-200	0.0200382866370829
APIP	rs3751076	11	G	A	11496	-0.139224	0.215991672231606	34666850	3.7083e-18	0.0160262821081034
APIP	rs3794155	11	A	G	11496	0.135330139527668	0.0781502499154421	34662120	3.6376e-08	0.0245706342873141
APIP	rs592175	11	T	G	11493	0.0823684168750967	0.40800649277113	35044681	8.3989e-10	0.0134207346555702
APIP	rs61881017	11	C	T	10585	0.307163101038715	0.0164909894593676	34690073	1.2585e-08	0.0539668466431321
APIP	rs7107626	11	C	T	6502	-0.210226	0.295672941837595	34786377	7.42e-28	0.0192162456500665
APIP	rs7123015	11	T	G	10665	0.297625660051127	0.0294630899719979	35087836	1.9761e-13	0.0404910834854058
APIP	rs745377	11	G	T	11158	-0.307686	0.488855329561095	34858413	8.0642e-117	0.0133915154915253
APIP	rs76549855	11	C	T	10333	0.20817659545819	0.060107937935687	34969855	1.1338e-12	0.0292662367792541
APIP	rs77619469	11	A	G	768	-1.62177	0.0128966495302251	35012730	7.4126e-13	0.226143771169133
APIP	rs77996367	11	T	G	5507	0.563143900370042	0.0136612021857923	34897794	6.8668e-12	0.0820861612107227
gene	SNP	chr	effect_allele	other_allele	samplesize	beta	eaf	pos	pval	se
APOBEC3C	rs112841497	22	T	C	14024	-0.276686	0.0169851380042463	39397601	2.1296e-09	0.0462098404211031
APOBEC3C	rs113545523	22	A	G	10516	0.304879762199071	0.0170005513692336	39413103	1.0919e-08	0.0533398233316546
APOBEC3C	rs117163502	22	A	G	25903	0.372203630040699	0.0485644324947186	39443199	4.2682e-74	0.0204390694350865
APOBEC3C	rs117392630	22	A	G	26349	0.155858616630475	0.0420701325561719	39061956	6.8498e-13	0.0216994704745461
APOBEC3C	rs117604034	22	A	G	26577	-0.148297	0.0474374476792856	39352654	3.6485e-13	0.0204044369296035
APOBEC3C	rs12484319	22	T	C	30165	0.186072944377743	0.0563969709047429	39615960	5.4725e-26	0.0176486213272766
APOBEC3C	rs139342	22	A	C	31238	-0.192929	0.438615602186294	39507654	1.5216e-126	0.00806252704845228
APOBEC3C	rs145600842	22	G	A	27501	0.174603103145358	0.0196869704806921	39441841	1.2809e-08	0.0306929708273169
APOBEC3C	rs1977068	22	G	C	21210	0.0985015501351335	0.374744344592501	39355110	9.2161e-23	0.0100304013253295
APOBEC3C	rs2142834	22	T	C	27128	0.353391637621539	0.318188001632431	39418613	1e-200	0.00921726119377412
APOBEC3C	rs34146529	22	T	G	20265	0.407790028541002	0.0288676761026991	39481012	5.3973e-43	0.029666518394055
APOBEC3C	rs35860424	22	A	G	20867	0.254667655455583	0.0434080547112462	39448465	2.9355e-26	0.0240218511961122
APOBEC3C	rs36069260	22	T	C	30902	0.0591548267361068	0.251829480775932	39656622	1.732e-10	0.00926697790144857
APOBEC3C	rs3891126	22	G	C	31237	-0.125896	0.0971064903294855	39484178	1.1878e-20	0.0135116363699799
APOBEC3C	rs5750781	22	A	C	27279	-0.0542745	0.265312556296163	39634434	2.1784e-08	0.00969707084425036
APOBEC3C	rs5757447	22	C	G	19974	-0.161487	0.1425934626485	39444189	1.5423e-29	0.014308999763967
APOBEC3C	rs5757473	22	A	G	19436	-0.192801	0.0267390850219344	39485126	8.6563e-10	0.0314408040852188
APOBEC3C	rs5995656	22	A	G	23140	-0.16868	0.0935233877663991	39407410	4.2929e-26	0.0159648524117917
APOBEC3C	rs6001470	22	A	G	31355	0.107423256206393	0.405764840182648	39569475	7.7645e-40	0.00813233426244894
APOBEC3C	rs7288049	22	G	A	31684	-0.0698068	0.280055620278853	39332229	3.0074e-15	0.00884694608587336
APOBEC3C	rs73159315	22	T	C	28473	-0.112129	0.0856910847080947	39213327	6.8979e-14	0.0149711130797461
APOBEC3C	rs76722179	22	C	T	22033	-0.259997	0.0145064276447694	39507337	6.764e-11	0.0398419924495451
APOBEC3C	rs78188275	22	T	C	28472	-0.211274	0.0574860024789503	39525880	8.3929e-32	0.0180032559425043
APOBEC3C	rs79951272	22	T	C	25646	-0.0888459	0.0987798356910213	39755787	1.9275e-09	0.014798768734281
gene	SNP	chr	effect_allele	other_allele	samplesize	beta	eaf	pos	pval	se
APOBEC3F	rs139343	22	G	A	13925	-0.0902102	0.431641305610408	39507685	8.8649e-14	0.0120980297328826
APOBEC3F	rs140136367	22	G	T	10660	-0.27374	0.0204450191741728	39459485	1.544e-08	0.0483947477043961
APOBEC3F	rs17496039	22	T	C	11496	-0.325999	0.0635035505902574	39482267	1.8298e-33	0.0270432917197973
gene	SNP	chr	effect_allele	other_allele	samplesize	beta	eaf	pos	pval	se
APOBEC3G	rs113417884	22	T	C	16749	0.295741665699768	0.0194081153588196	39414523	8.1919e-14	0.0396054298398018
APOBEC3G	rs12152196	22	A	G	25229	0.156686557917145	0.0307722461779694	39450607	1.2139e-09	0.0257775990255898
APOBEC3G	rs12157810	22	C	A	28974	-0.0706046	0.231689645178653	39353172	7.4452e-13	0.00984598384487951
APOBEC3G	rs12170725	22	G	C	19322	0.0728455390016686	0.316943659057996	39574165	2.6866e-11	0.0109330079997702
APOBEC3G	rs12627955	22	G	A	28334	-0.273018	0.0650703865946498	39575221	7.8377e-58	0.0170313826256414
APOBEC3G	rs139376	22	G	A	30150	0.0720127956223269	0.536854988353271	39524131	1.1694e-18	0.00816684573327816
APOBEC3G	rs149681550	22	A	G	18449	-0.319145	0.0178834265528407	39593405	4.4884e-16	0.0392818288478017
APOBEC3G	rs2011869	22	A	G	31101	0.170619901298794	0.632458143074581	39480697	1.5431e-93	0.00831626899937583
APOBEC3G	rs28537571	22	A	G	24168	-0.56451	0.0342947226960252	39481395	5.9229e-113	0.0249935931434355
APOBEC3G	rs4456800	22	T	C	27056	0.0735216966071862	0.155183269619969	39467322	5.9255e-10	0.011872700299909
APOBEC3G	rs5750678	22	T	C	31430	-0.0582713	0.201191	39160117	4.713e-09	0.00994916879230462
APOBEC3G	rs5750708	22	A	G	30977	0.0565165522410406	0.290430493959321	39335697	1.7028e-10	0.00885007081757605
APOBEC3G	rs5750764	22	T	G	31427	-0.1137	0.319758701044877	39585424	2.488e-40	0.00855245615083337
APOBEC3G	rs5757502	22	A	T	30979	-0.133086	0.290910483191669	39561707	3.6786e-51	0.00884547351751466
APOBEC3G	rs6001414	22	C	T	26812	-0.759902	0.0629803101268701	39470327	1e-200	0.0177763929114225
APOBEC3G	rs9607600	22	T	C	21280	-0.0801035	0.449055228142658	39395418	2.0384e-16	0.00974530147454836
APOBEC3G	rs9622815	22	A	G	29244	-0.126943	0.039143430373009	38867046	2.6167e-09	0.0213210157612946
gene	SNP	chr	effect_allele	other_allele	samplesize	beta	eaf	pos	pval	se
APOL6	rs2285102	22	A	T	13925	-0.0978914	0.267510744569636	36097664	4.7734e-13	0.013536804470221
APOL6	rs5755832	22	G	A	11158	0.311528634865673	0.0531656548135299	36057360	1.6077e-25	0.0298359065705435
APOL6	rs77311828	22	A	G	11496	-0.48476	0.0214426741356352	36044487	1.7892e-26	0.0455280464280218
gene	SNP	chr	effect_allele	other_allele	samplesize	beta	eaf	pos	pval	se
APP	rs10854297	21	T	C	31342	0.141309344585211	0.0740908575960122	27451203	1.9253e-20	0.0152494841186221
APP	rs112547745	21	C	T	31020	-0.0865752	0.861806643984862	27603814	9.9323e-14	0.0116336395729022
APP	rs148286309	21	T	G	30839	0.126509646160466	0.0624759411809993	27628993	2.8756e-14	0.0166374684254746
APP	rs148444134	21	A	G	28230	0.220903501450957	0.0359022636826565	27475026	1.5849e-22	0.0226208080949216
APP	rs17001470	21	T	C	28312	-0.172778	0.0179949682316319	27260316	4.6186e-08	0.0316131177281903
APP	rs1857846	21	A	C	31470	0.0725156478936069	0.718497500845579	28008257	2.801e-16	0.00886304332709268
APP	rs2051176	21	A	G	31016	0.179190317954988	0.0486522653412349	27475375	7.8866e-22	0.0186625476956953
APP	rs2830026	21	C	T	31141	0.0744183255826749	0.341704718417047	27423131	1.2717e-18	0.00844856336936049
APP	rs2830076	21	T	C	31470	0.219902847511551	0.338569656883009	27502468	3.0203e-150	0.0084230728500778
APP	rs3787636	21	C	A	30688	-0.124731	0.183354628876757	27371334	5.925e-33	0.0104312899629888
APP	rs404164	21	C	T	27514	-0.1376	0.466958018805456	27522936	2.3913e-58	0.00854453650632653
APP	rs452987	21	A	G	31017	-0.0873918	0.161244074017434	27552287	1.1966e-15	0.0109175559202425
APP	rs458408	21	T	C	31132	0.0535006075570717	0.405447070914697	27588541	5.5866e-11	0.00816242391594655
APP	rs61707145	21	T	C	31470	-0.0494652	0.724604457138562	27163730	2.9632e-08	0.00892293391620904
APP	rs7278595	21	C	A	31349	0.0811763436086597	0.471345514950166	27682574	3.4452e-24	0.00800050693927499
APP	rs8134954	21	T	A	30858	-0.103303	0.0476208793322306	27627311	4.6186e-08	0.0189015524930013
gene	SNP	chr	effect_allele	other_allele	samplesize	beta	eaf	pos	pval	se
AQP3	rs10120325	9	G	T	31017	-0.0736851	0.225599414077558	33527793	1.7066e-14	0.00960579440308573
AQP3	rs117283178	9	G	A	22578	0.191775739286441	0.0287950637033651	33403196	9.4395e-12	0.0281402405409304
AQP3	rs12555686	9	T	G	31143	0.113671424047846	0.0614738376553629	33447547	9.479e-12	0.0166815508860682
AQP3	rs3814511	9	T	C	31684	-0.0629136	0.824269983840054	33816476	1.6641e-09	0.0104377594258754
AQP3	rs567691	9	T	C	31684	-0.0638539	0.164042241346913	33439829	2.6424e-09	0.0107274126317806
AQP3	rs583076	9	T	G	31565	0.120888296804203	0.605756889392223	33453230	7.6994e-50	0.00814424571218202
AQP3	rs58727961	9	C	T	24999	0.168531457710459	0.030666532824734	33547799	8.1829e-11	0.0259390903328294
AQP3	rs7044689	9	C	G	31563	0.0558591709441719	0.227857897916037	33638046	3.9422e-09	0.00948888546309912
AQP3	rs706127	9	A	G	31684	0.1110420022246	0.239543011762937	33303900	8.2375e-33	0.00930756160570981
AQP3	rs72709612	9	T	C	31566	-0.120965	0.113302631082254	33452272	5.7561e-22	0.0125564687073852
AQP3	rs832231	9	A	G	27070	-0.104345	0.650125028415549	33414020	5.2412e-31	0.00901126981065371
gene	SNP	chr	effect_allele	other_allele	samplesize	beta	eaf	pos	pval	se
ARAP3	rs10065068	5	T	C	31555	0.0982826891261525	0.0887839879154079	141092048	2.1778e-12	0.013995000373952
ARAP3	rs111260438	5	A	G	25731	0.138824444886332	0.0396252904725019	141198910	8.0774e-10	0.0225969634388105
ARAP3	rs111543038	5	T	C	24988	0.18105420671555	0.0220710088886657	141192300	2.7444e-09	0.0304477005777529
ARAP3	rs11167756	5	C	T	30971	0.130119189665873	0.410430182267532	141059868	3.911e-57	0.00816808261452291
ARAP3	rs116490745	5	G	T	25618	-0.561677	0.0158448133184053	141138457	9.2328e-57	0.0353783061083555
ARAP3	rs11958260	5	C	T	31672	0.117887819907891	0.258130616234914	141091655	1.5119e-38	0.00907953849828566
ARAP3	rs11958815	5	C	G	24296	0.373284777206585	0.0204723999791894	141054147	2.2309e-31	0.0320350122898789
ARAP3	rs12658441	5	C	T	31684	0.104474237380476	0.232139501672366	141227079	1.2076e-28	0.00940912661597476
ARAP3	rs143235060	5	T	C	28288	-0.406608	0.0278507732735967	140933188	5.067e-57	0.0255504635689684
ARAP3	rs143987576	5	T	C	23281	-0.205069	0.0368559815445458	140129157	7.607e-17	0.0245971381269967
ARAP3	rs144268375	5	C	T	25906	-0.147296	0.0276270942345543	141291979	3.8983e-08	0.0268040730262996
ARAP3	rs145755279	5	T	C	15878	-0.32784	0.0134147877566444	140642064	1.8023e-11	0.0487784391873632
ARAP3	rs148831863	5	A	C	27310	-0.171093	0.931324488419159	141266053	4.8578e-24	0.016918922037702
ARAP3	rs149927716	5	C	G	28173	-0.599335	0.0191791497099316	141022205	8.5805e-85	0.0307155951841973
ARAP3	rs152278	5	G	A	31354	-0.54434	0.0689333688496518	141095898	1e-200	0.0157628009862903
ARAP3	rs1651423	5	T	C	31682	-0.261388	0.865467734054948	141071879	1.2345e-111	0.0116423335646506
ARAP3	rs17097553	5	T	C	30107	0.0888408330884631	0.267038191115372	141160210	5.1813e-22	0.00921136303757121
ARAP3	rs17610129	5	T	G	31233	-0.146307	0.0512653872620231	141162586	7.3596e-16	0.0181423548746444
ARAP3	rs17629011	5	T	C	30547	-0.220888	0.0711369346733668	140528013	9.5735e-45	0.0157390059281989
ARAP3	rs182931630	5	T	C	26425	-0.269658	0.015807962529274	140655651	1.0554e-14	0.034873828841607
ARAP3	rs2237080	5	A	T	31565	-0.206342	0.46474141185353	140885783	1.9779e-147	0.00797984759074208
ARAP3	rs246674	5	T	C	31684	0.0917922655232442	0.157409147280995	140459580	3.9223e-17	0.0109079125300937
ARAP3	rs248491	5	T	C	31566	0.0938626146423367	0.0626061681325733	141166695	1.1087e-08	0.0164287915289477
ARAP3	rs248495	5	C	T	31567	-0.0730395	0.581137701947758	141212882	1.3707e-19	0.00806664947396168
ARAP3	rs248525	5	T	C	31564	0.0797346034655725	0.20027181094039	141128436	1.0801e-15	0.00994507059127814
ARAP3	rs251018	5	G	T	31299	-0.139895	0.478988712629652	140902116	1.8576e-68	0.00800080278367639
ARAP3	rs31871	5	C	A	31231	-0.0842677	0.395989447927818	140380123	7.0461e-25	0.00818140680091002
ARAP3	rs32928	5	T	C	31354	-0.111499	0.177613303398151	141147245	1.3882e-26	0.0104487115755488
ARAP3	rs349132	5	T	C	31684	0.229050524601047	0.505956631215002	141064627	9.7304e-183	0.00794558387509962
ARAP3	rs34985155	5	T	C	25906	0.150841662916101	0.0281791560654793	140943432	1.3328e-08	0.0265477503856283
ARAP3	rs35542565	5	G	A	28471	0.163383740556822	0.109142588476663	140692107	5.2786e-34	0.0134394785355616
ARAP3	rs3797057	5	C	G	31562	0.0865821416847319	0.170347717748329	141129129	2.8907e-16	0.0105873319170853
ARAP3	rs3822339	5	C	A	31355	-0.136165	0.0899923896499239	140504432	1.7015e-22	0.0139542402309907
ARAP3	rs4912611	5	G	A	31684	-0.153116	0.750497951820812	141108547	1.8631e-62	0.00918022206341179
ARAP3	rs4912768	5	A	C	31684	0.170778315554506	0.475741290540794	141086579	2.9959e-102	0.00795438760460116
ARAP3	rs58900279	5	T	C	23564	-0.117566	0.0568446103088323	141239300	3.4294e-09	0.0198940966223916
ARAP3	rs622766	5	T	C	31354	-0.296487	0.373587275010465	141054588	1e-200	0.00825490732467611
ARAP3	rs62378921	5	G	A	28787	0.104103983838056	0.0582405533063428	140654086	4.9157e-09	0.0177952486005464
ARAP3	rs62381448	5	A	C	19569	0.235369436901275	0.0205257347868083	141261178	4.051e-11	0.0356496125443065
ARAP3	rs628301	5	C	T	31569	0.0802966777876481	0.42981429757681	140593256	1.7167e-23	0.00803907349475367
ARAP3	rs6580201	5	G	T	31236	0.146841780636894	0.0604525820878407	141072485	2.191e-18	0.0167876735608658
ARAP3	rs6878397	5	A	G	31568	-0.065129	0.222530479749368	141474012	9.9655e-12	0.00956808511631501
ARAP3	rs73287735	5	T	C	29901	0.135586316676512	0.0746596310319826	141061937	2.9076e-18	0.0155578102899039
ARAP3	rs75065885	5	C	T	31569	0.096519469842302	0.102532648901638	140935085	1.8809e-13	0.0131194059864486
ARAP3	rs75164050	5	C	G	31238	-0.249165	0.0687421167297328	141078791	6.071e-56	0.0158123697200695
ARAP3	rs75513915	5	T	C	29835	0.182904805670416	0.0392568659127625	141027845	4.0706e-18	0.0210795106167428
ARAP3	rs75874482	5	C	T	29788	0.17798774000935	0.0258973010156598	140630834	5.2003e-12	0.0257949507991695
ARAP3	rs7703688	5	C	T	31355	-0.560861	0.0817161339421613	140938633	1e-200	0.0145777069933308
ARAP3	rs77227638	5	T	C	23757	-0.279558	0.0210362916175998	140783285	2.2341e-18	0.0319684305700658
ARAP3	rs7722894	5	T	C	31684	-0.243939	0.94892705475591	141212652	1.2147e-41	0.0180448440791772
ARAP3	rs7724001	5	T	A	31480	-0.195128	0.151865177049801	140683652	4.0511e-69	0.0111046811329443
ARAP3	rs77241684	5	G	A	29777	0.182788955448599	0.0311715650554611	141140592	9.0599e-15	0.0235798907943342
ARAP3	rs78668600	5	G	A	25767	0.364069898188603	0.0210467813647787	140722517	1.8381e-32	0.0306887542411136
ARAP3	rs79463892	5	T	C	29777	0.126909956841885	0.0435389846975953	140652207	2.6156e-10	0.0200803716463165
gene	SNP	chr	effect_allele	other_allele	samplesize	beta	eaf	pos	pval	se
ARHGAP11A	rs118151036	15	C	A	26163	-0.183562	0.039139242441616	32945462	3.856e-16	0.0225426410354558
ARHGAP11A	rs12708484	15	T	C	24627	0.27306015844699	0.0294189304421976	32937463	1.3124e-24	0.0266655102875911
ARHGAP11A	rs28600268	15	C	T	26280	0.0564314843501334	0.2787100456621	33159032	6.6078e-09	0.00972839215097029
ARHGAP11A	rs34954129	15	T	A	13774	-0.39266	0.247785683171192	32940190	3.4958e-174	0.0139555211897266
ARHGAP11A	rs4991470	15	A	G	21842	0.110267031565363	0.199523853127003	32907384	3.2552e-20	0.0119720133289937
ARHGAP11A	rs56338436	15	C	T	26490	-0.066927	0.320422801057003	32977750	6.5459e-13	0.00931028374976351
ARHGAP11A	rs58728457	15	A	G	25942	0.118078075605404	0.15592475522319	32942035	1.7183e-22	0.0121013872143608
ARHGAP11A	rs62001356	15	G	A	26490	-0.0659255	0.212325405813515	33187092	5.4419e-10	0.0106235489339539
ARHGAP11A	rs71462821	15	G	A	24068	-0.161562	0.0474696692704005	33027805	4.787e-14	0.0214347040247628
gene	SNP	chr	effect_allele	other_allele	samplesize	beta	eaf	pos	pval	se
ARHGAP19	rs11188994	10	T	C	19809	0.0625126696896959	0.548917158867182	98792520	5.9632e-10	0.0100965306774927
ARHGAP19	rs11189204	10	T	C	26492	0.311960261373189	0.659557602295032	99164394	1e-200	0.00916810214840665
ARHGAP19	rs112241359	10	T	C	26165	0.22400127262675	0.0709344544238487	99296044	1.6013e-39	0.0170283606211325
ARHGAP19	rs113727712	10	C	A	20098	0.169969426832026	0.0469200915513981	99022835	5.7619e-13	0.0235865541938922
ARHGAP19	rs113973007	10	G	A	23499	0.188536582779739	0.0365334695093408	99275269	1.7443e-14	0.0245864901972718
ARHGAP19	rs1343652	10	A	C	26609	-0.064555	0.732834755158029	99459308	4.4101e-11	0.00979665278874775
ARHGAP19	rs1361419	10	A	G	26609	-0.0568563	0.233511218008944	99560378	2.8698e-08	0.0102462264353562
ARHGAP19	rs139470491	10	A	G	20423	0.769352503860181	0.0189002595113353	99100312	1.687e-99	0.03633580359603
ARHGAP19	rs140080366	10	C	A	20412	-0.384823	0.0316480501665687	99175775	3.4168e-42	0.0282717132627982
ARHGAP19	rs147474565	10	G	C	19735	0.245246084775224	0.0147453762351153	99551851	4.2901e-09	0.0417603631677463
ARHGAP19	rs149803047	10	A	G	21429	0.24264079212883	0.0198796024079518	98903880	2.3561e-12	0.034605130300616
ARHGAP19	rs150879770	10	T	C	10096	-0.512771	0.0173831220285261	99124224	1.6825e-21	0.053846109742972
ARHGAP19	rs1565494	10	G	A	26592	0.0681559039668384	0.644498345367028	98846928	5.337e-14	0.00905894837136988
ARHGAP19	rs190750423	10	T	C	22507	-0.330873	0.0210378993202115	99103622	7.1551e-24	0.0328429433362501
ARHGAP19	rs2220594	10	T	C	25857	-0.157915	0.148586456278764	98945063	2.3263e-37	0.0123633466025025
ARHGAP19	rs2636769	10	T	C	25978	-0.0803386	0.560839941488952	98936158	1.0069e-19	0.00883997956625901
ARHGAP19	rs2784920	10	G	T	26609	-0.0632381	0.226539892517569	98913628	1.0178e-09	0.0103556990497718
ARHGAP19	rs28616696	10	T	C	20434	-0.261529	0.0172995987080356	99188252	5.4398e-12	0.0379384624806197
ARHGAP19	rs34038589	10	A	G	20362	0.204900054123358	0.0211914350260289	99003811	2.6007e-09	0.0344069139782641
ARHGAP19	rs34106814	10	T	C	24761	0.108587659623788	0.0923024110496345	99308950	2.664e-12	0.0155247207983113
ARHGAP19	rs4086677	10	A	G	26280	-0.111609	0.135844748858447	99360967	1.8349e-18	0.0127307798318025
ARHGAP19	rs4919116	10	G	T	21542	0.084658452444678	0.718944387707734	99365119	2.816e-15	0.0107176164634356
ARHGAP19	rs61863814	10	G	A	18477	-0.442428	0.0202955025166423	99117883	3.8664e-33	0.0368911180455807
ARHGAP19	rs701803	10	T	C	20467	-0.164252	0.0379391215126789	98948671	2.1672e-10	0.0258709868233429
ARHGAP19	rs701810	10	T	C	26492	-0.395141	0.332760833459157	98974849	1e-200	0.00921978432071339
ARHGAP19	rs701822	10	C	T	26088	-0.249071	0.036951855259123	99038933	7.1554e-27	0.023207186145108
ARHGAP19	rs7068278	10	T	G	26487	-0.133541	0.205987843092838	99357142	1.7874e-35	0.0107432144614172
ARHGAP19	rs71486130	10	C	A	20831	0.100694211601361	0.108276126926216	99467374	1.6984e-10	0.0157669753854067
ARHGAP19	rs72821771	10	T	C	23538	0.23700921587219	0.0736256266462741	98940876	4.045e-41	0.0176478764452595
ARHGAP19	rs73324890	10	T	C	26485	0.757806380075777	0.0532565603171607	98974101	1e-200	0.0193500594968664
ARHGAP19	rs74696435	10	T	A	26065	0.168010935940418	0.0339919432188759	98909955	3.6219e-12	0.0241700621389714
ARHGAP19	rs75101526	10	G	A	25411	-0.252343	0.0272716540081067	98960002	1.9398e-20	0.0272347002058255
ARHGAP19	rs75768137	10	A	G	21935	0.117521443688643	0.0541372236152268	99238740	2.5474e-08	0.021098623667195
ARHGAP19	rs75929214	10	T	C	26608	0.108923242289511	0.0841476247745039	99359406	3.05e-12	0.0156151160905327
ARHGAP19	rs76409725	10	G	A	20154	0.201529578329614	0.0365436141708842	99013454	3.1501e-14	0.0265449918769249
ARHGAP19	rs77725320	10	G	A	25472	-0.306428	0.041398398241206	99061337	3.4476e-43	0.0222404021033155
ARHGAP19	rs78335010	10	G	A	24827	-0.135036	0.0616667337978813	98791762	4.5401e-13	0.0186560136191646
ARHGAP19	rs7923541	10	T	C	26609	-0.13354	0.510109361494231	99279160	1.6316e-53	0.00867140575448035
ARHGAP19	rs80347374	10	A	G	24309	-0.119725	0.0869019704636143	98820067	1.0347e-13	0.0161000765359398
gene	SNP	chr	effect_allele	other_allele	samplesize	beta	eaf	pos	pval	se
ARHGAP21	rs10734055	10	C	T	14263	-0.171148	0.532376263670187	24996710	3.7087e-47	0.0118664809205443
ARHGAP21	rs112299061	10	T	C	13100	0.163032438441878	0.0655987795575896	24900106	6.4293e-11	0.0249536900299811
ARHGAP21	rs11598911	10	G	C	14248	-0.0769078	0.241389142335766	24822219	2.7634e-08	0.0138433008069121
ARHGAP21	rs12415644	10	G	A	13100	0.161127159940943	0.0723003182019576	24882558	1.4343e-11	0.0238547871701743
ARHGAP21	rs12767180	10	A	G	14248	-0.110881	0.168265417878319	25233083	2.5161e-12	0.0158350061069057
ARHGAP21	rs16925127	10	A	G	11496	0.211875999842747	0.0304212501065916	25179312	3.4366e-08	0.0384000289696149
ARHGAP21	rs16925138	10	G	A	11158	-0.178837	0.0890803369105135	25181968	2.7367e-14	0.0234996210915217
ARHGAP21	rs2225781	10	A	G	14263	-0.140423	0.0572472840353782	25059475	3.5883e-08	0.0254860905182242
ARHGAP21	rs2256766	10	T	A	13925	0.0666229023894599	0.442469482019136	24852071	3.3516e-08	0.0120645580365542
ARHGAP21	rs4295955	10	A	G	14249	0.133677930851113	0.444146525679758	25091035	3.5365e-29	0.0119220108315672
ARHGAP21	rs6482452	10	G	C	14260	-0.0950424	0.141425389755011	25173621	2.2292e-08	0.0169930966132504
gene	SNP	chr	effect_allele	other_allele	samplesize	beta	eaf	pos	pval	se
ARHGAP26	rs245853	5	T	C	24314	0.180096910807935	0.0322262071833255	142394950	2.326e-12	0.0256782409615511
ARHGAP26	rs246666	5	A	T	31184	0.294850701222484	0.0860814278601249	142420963	9.1363e-95	0.0142761337708311
ARHGAP26	rs36015018	5	C	T	14562	0.26460534458256	0.021344998418889	142506228	6.7279e-11	0.0405426017501548
ARHGAP26	rs4912886	5	A	C	11770	0.279930613880532	0.0181478715459298	142304911	9.867e-09	0.0488270942213692
ARHGAP26	rs60259893	5	C	T	26278	0.368025346144893	0.0194076309956138	142354366	2.6106e-31	0.03161974260423
ARHGAP26	rs712172	5	G	A	31683	0.114124795521705	0.666340950090198	142310349	8.3895e-42	0.00842504340957081
ARHGAP26	rs853165	5	A	G	31300	0.0474469014694712	0.647378455672069	142550251	1.413e-08	0.00836525705133575
ARHGAP26	rs9324903	5	A	C	31554	0.0958632282201732	0.0881075569319083	142484816	8.7315e-12	0.0140436308023869
gene	SNP	chr	effect_allele	other_allele	samplesize	beta	eaf	pos	pval	se
ARHGEF19	rs11203290	1	T	C	25631	-0.0782816	0.334263196909992	17389580	6.2189e-17	0.00936281974922766
ARHGEF19	rs11260703	1	C	T	30535	-0.186144	0.116987431264729	16538272	1.8306e-49	0.0125902106011654
ARHGEF19	rs11260744	1	T	C	21847	-0.107587	0.0874373956594324	16465404	2.1171e-10	0.0169359341755578
ARHGEF19	rs11260929	1	C	T	30847	0.537051881306775	0.117181437218687	16513746	1e-200	0.0125173788601842
ARHGEF19	rs113286431	1	C	T	27210	0.174023585241143	0.0192229500790603	17344843	2.4896e-08	0.0312194727927135
ARHGEF19	rs113624091	1	T	C	12747	0.384373631767006	0.0144681960375391	16134962	2.3292e-13	0.0524491549112378
ARHGEF19	rs115033991	1	A	G	24751	0.204214969950136	0.0168733482415125	17523367	4.857e-09	0.0348966114063801
ARHGEF19	rs116036032	1	T	C	21306	0.22083190729592	0.0149097406198016	16352547	3.3024e-08	0.0399724699156354
ARHGEF19	rs12064256	1	A	G	31684	0.268407954324313	0.0701454395129467	16769949	1.0121e-66	0.0155545612992839
ARHGEF19	rs12064418	1	T	C	30077	0.219879885024102	0.162946964242861	16761962	2.9217e-88	0.0110399757502047
ARHGEF19	rs12131407	1	T	C	30662	0.299152514959806	0.043225075233517	16656518	2.7351e-51	0.0198569248051698
ARHGEF19	rs12409967	1	G	A	20046	-0.279833	0.0186360296573375	16540490	3.5201e-14	0.0369300068362851
ARHGEF19	rs141182734	1	A	G	17073	0.439505819600732	0.0203367227871312	16768781	2.0191e-30	0.0383399183140021
ARHGEF19	rs141358251	1	T	C	31562	-0.105091	0.066409936950202	16096349	4.885e-11	0.0159848328829937
ARHGEF19	rs145729217	1	A	C	22351	-0.175433	0.0222563093308636	16412290	4.4599e-08	0.0320625040588331
ARHGEF19	rs146452404	1	T	C	25874	0.205483938186564	0.0216356555603635	17422149	1.0404e-11	0.0302146715366669
ARHGEF19	rs149562	1	T	C	30746	-0.114943	0.264325503486424	16795201	3.1186e-36	0.00914488621890029
ARHGEF19	rs17450703	1	T	C	24923	0.450061372357957	0.024158605401048	16441163	1.0611e-53	0.0291715358571669
ARHGEF19	rs190382742	1	A	G	21597	-0.190579	0.0225154339668321	16383112	4.1979e-09	0.0324334518537096
ARHGEF19	rs1977269	1	A	C	18903	-0.109355	0.737127567254845	17004850	7.9888e-21	0.0116835759526311
ARHGEF19	rs221048	1	C	T	31684	-0.266819	0.743958810928633	16530716	6.7575e-189	0.00910197495862392
ARHGEF19	rs2230597	1	A	G	29125	0.072375600801761	0.63033264033264	16464673	3.4039e-17	0.00858344411785591
ARHGEF19	rs28553367	1	G	T	24492	-0.0589872	0.2728021836535	16407987	6.0706e-09	0.0101443137426118
ARHGEF19	rs34554547	1	T	C	30408	-0.0760602	0.6724627955631	16364929	1.3297e-18	0.00864025627374978
ARHGEF19	rs35064722	1	G	A	26432	0.436324687552666	0.022451655195018	16694310	5.7989e-50	0.0293580147994689
ARHGEF19	rs35075024	1	T	G	31178	0.323788355518999	0.0231774125579435	16432658	4.7279e-34	0.0266146373866904
ARHGEF19	rs3738605	1	A	G	31676	-0.175526	0.410266531333409	16723084	1.0405e-104	0.00807716402694494
ARHGEF19	rs41269193	1	T	G	27379	-0.225006	0.0553488163558106	16730308	2.2002e-33	0.0186890104051321
ARHGEF19	rs41269205	1	G	T	25194	0.270295004500772	0.030791788856305	16809796	1.0518e-25	0.0257875710293059
ARHGEF19	rs41339145	1	G	T	31684	-0.0841874	0.153106091923785	16296695	2.3222e-14	0.0110320001695809
ARHGEF19	rs59715737	1	A	G	28672	0.271752893150714	0.0644361571386193	16741630	1.8247e-57	0.01700804818848
ARHGEF19	rs61136562	1	A	G	26616	0.156961081488331	0.0434055986258762	16379823	1.5924e-13	0.021270456749059
ARHGEF19	rs61769327	1	T	C	30363	0.129043259009631	0.0354911420436571	17471049	4.0192e-09	0.0219330770816063
ARHGEF19	rs61769797	1	C	T	25360	-0.251757	0.023859995070249	16584005	5.0163e-18	0.0290950526146101
ARHGEF19	rs61771381	1	T	C	31564	0.559049215823208	0.103816678621315	16514898	1e-200	0.0130483918706387
ARHGEF19	rs61772380	1	G	A	24430	0.237522998710238	0.0282614311547404	16366089	3.3013e-18	0.0272992976094151
ARHGEF19	rs61783873	1	G	A	27310	0.0717793811954882	0.14598605801664	16119737	3.1574e-09	0.0121181404277157
ARHGEF19	rs74722532	1	A	G	25179	0.183450359554956	0.0299442896935933	16191212	2.2798e-12	0.0261463106701476
ARHGEF19	rs75754810	1	T	C	24679	-0.210329	0.0186696592532136	16572508	2.5323e-10	0.0332541165147888
ARHGEF19	rs77078559	1	A	G	24804	-0.230725	0.0228597496071773	16510500	1.5835e-14	0.0300406935307619
ARHGEF19	rs77309698	1	T	C	27674	-0.165776	0.0542723129342006	16702720	9.9207e-19	0.0187619000002714
ARHGEF19	rs77312254	1	C	T	25023	-0.304629	0.0238871064768398	16620415	2.3231e-25	0.0292740976232108
ARHGEF19	rs77903816	1	T	C	4764	0.634955000635049	0.0332703610411419	16526557	1.0558e-28	0.057123900231665
ARHGEF19	rs79415741	1	A	G	28473	-0.0922965	0.13112231814685	16449884	1.0504e-13	0.0124151153159658
gene	SNP	chr	effect_allele	other_allele	samplesize	beta	eaf	pos	pval	se
ARL3	rs10883740	10	C	A	10515	0.140395713505345	0.105249274597731	104334822	4.1627e-10	0.022470864371284
ARL3	rs111496314	10	A	G	14177	0.285165152080432	0.0172915319974144	104566740	3.8696e-10	0.0455579052433831
ARL3	rs117305908	10	T	C	14263	0.20028160042232	0.0295828485956457	104208458	9.9723e-09	0.0349446209342081
ARL3	rs2002916	10	G	A	14254	0.166761476118155	0.311799131583915	104432053	6.9844e-39	0.0127856133312495
ARL3	rs7070903	10	G	C	13925	-0.14181	0.690988683284906	104520197	7.7717e-28	0.0129677533216357
ARL3	rs7090337	10	A	G	14262	-0.0817789	0.374230928924622	104775483	2.3282e-11	0.0122353923467178
ARL3	rs71471263	10	A	G	11492	0.314088406163184	0.0366275536440559	104758730	3.733e-19	0.0351144707103853
ARL3	rs9645569	10	A	G	13840	0.265094853063818	0.152649366793567	104496598	1.1577e-56	0.0167123635475418
gene	SNP	chr	effect_allele	other_allele	samplesize	beta	eaf	pos	pval	se
ARL4C	rs1024688	2	G	A	31567	0.098514111314957	0.0982372036841311	234930596	1.7425e-13	0.0133716251750899
ARL4C	rs112389245	2	T	C	23955	0.205832341200888	0.0289459745762712	235329771	4.2469e-14	0.0272502900946445
ARL4C	rs115525413	2	C	T	25481	-0.16999	0.0252621777908458	235442536	1.7227e-09	0.0282291281681748
ARL4C	rs116607523	2	C	T	22579	0.21724860760349	0.0179101919561243	235366048	9.2061e-10	0.0354819049460198
ARL4C	rs11695247	2	A	G	31683	-0.101598	0.190638153938665	234899273	9.5672e-24	0.010113362583233
ARL4C	rs12478222	2	T	C	30746	0.0756567434940415	0.551049822757197	235348714	1.0448e-20	0.0081076722385513
ARL4C	rs12620312	2	G	C	30902	0.172514188367849	0.416385952685174	235351091	3.2831e-99	0.00815982425268538
ARL4C	rs12992235	2	G	A	31240	0.144828348608792	0.0571373972864514	235246530	4.3744e-17	0.0172363402093177
ARL4C	rs12994452	2	G	A	24464	0.177965421256611	0.0216101913456083	235365444	1.0404e-08	0.0310910938603444
ARL4C	rs143308038	2	A	G	18098	0.249713183095561	0.0284009282793679	235357554	2.9786e-15	0.031641706445287
ARL4C	rs1509085	2	G	C	30076	-0.154579	0.255729770809168	235393146	1.8902e-61	0.00934585407253344
ARL4C	rs2055761	2	T	C	25906	-0.249081	0.0387403389179588	235356649	7.3224e-28	0.0227657915405962
ARL4C	rs3105845	2	T	C	31567	-0.154826	0.0327834818058282	235336043	4.2865e-12	0.0223500735378717
ARL4C	rs4663146	2	A	G	31355	-0.0673411	0.144596651445967	235411142	3.011e-09	0.0113544737010613
ARL4C	rs59768671	2	G	C	31567	-0.102517	0.841914540238563	235300489	5.5928e-21	0.010909086332639
ARL4C	rs62184403	2	G	A	30192	0.109835247274333	0.170442329896086	235393512	3.3546e-24	0.0108224861337629
ARL4C	rs6704990	2	T	C	31569	0.10832804834178	0.216086661130822	235198914	3.9505e-29	0.00966955711343212
ARL4C	rs72975537	2	G	T	28588	0.0796629666326716	0.19748649683154	235416564	3.3713e-14	0.0105050527649798
ARL4C	rs72982181	2	A	G	31564	-0.0650431	0.136113103552418	235198379	2.0946e-08	0.0116067484774643
ARL4C	rs77502381	2	G	T	25906	0.168690474616119	0.0213623925879699	235257684	2.8274e-08	0.0303842782860136
ARL4C	rs78017017	2	C	A	31684	0.0763721273325874	0.895279792551392	235134203	3.9422e-09	0.0129738944947147
ARL4C	rs78140195	2	A	G	31238	-0.165336	0.0494591598822765	235200540	3.2292e-19	0.0184516255981697
ARL4C	rs79496728	2	A	G	26488	0.185850128367608	0.0399990659879512	235410002	5.1947e-17	0.0221717342934049
ARL4C	rs80071782	2	C	T	31232	-0.12587	0.0349810758114463	235259299	7.4701e-09	0.0217771282271387
ARL4C	rs8245	2	G	C	31674	-0.199782	0.223636226925824	235403987	1.7991e-97	0.00953520065816033
ARL4C	rs906747	2	A	G	31684	0.189349133518817	0.488030365665752	235334930	1.8221e-125	0.00794729759245587
gene	SNP	chr	effect_allele	other_allele	samplesize	beta	eaf	pos	pval	se
ARL4D	rs111886783	17	T	C	26320	-0.128086	0.0472401564062926	41470945	4.5236e-10	0.020544457327199
ARL4D	rs12944058	17	C	T	30935	0.128808127502108	0.32605509414108	41486872	5.5133e-51	0.00857634512964301
ARL4D	rs9783822	17	G	A	30092	-0.0707849	0.759023519366607	41514542	1.1126e-13	0.00953113300869527
gene	SNP	chr	effect_allele	other_allele	samplesize	beta	eaf	pos	pval	se
ARMC7	rs11655331	17	T	C	25177	-0.146019	0.0318376280967068	73185235	8.7777e-09	0.025382743420961
ARMC7	rs117950150	17	A	G	23663	0.204926456515837	0.0201474069292016	73125809	3.7571e-10	0.0327159961230941
ARMC7	rs145728947	17	G	C	30871	-0.146202	0.0715420995503179	73308625	7.7504e-21	0.015615205521262
ARMC7	rs146676996	17	A	G	27357	0.139304933574197	0.0430167848487568	73158127	3.8122e-11	0.021070732469287
ARMC7	rs1491765	17	A	G	31684	0.0709740664239105	0.291536698109662	73028923	4.6772e-16	0.00874097151667063
ARMC7	rs35687632	17	G	T	31558	0.0795920018977319	0.190159725106672	73566785	4.2679e-15	0.0101431140829795
ARMC7	rs3935680	17	C	T	31345	0.11697731766452	0.473829463266083	73095828	1.9687e-48	0.00799883192115315
ARMC7	rs4789146	17	C	T	28917	-0.209153	0.358862511534267	73135593	1.3148e-128	0.00866899500548718
ARMC7	rs62084979	17	C	T	30406	-0.156228	0.0705657099996052	73108878	5.8101e-23	0.0158343103679103
ARMC7	rs7212620	17	T	A	28004	-0.0991514	0.283200314012822	73461930	4.0012e-26	0.00937840965748066
ARMC7	rs7217512	17	T	C	30902	-0.0974027	0.0968172842374259	73572644	8.0325e-13	0.013602773007647
ARMC7	rs75581000	17	A	G	26235	-0.163825	0.0379725897920605	73070181	7.3694e-13	0.0228410274609273
ARMC7	rs75669531	17	C	T	25370	0.164753372125268	0.0250554323725055	73141875	6.6236e-09	0.0284042846275654
ARMC7	rs76526830	17	A	G	24534	-0.196336	0.0176781951796084	73402733	9.9605e-09	0.034257444854849
ARMC7	rs77950538	17	T	C	25213	0.143488037109589	0.0328980037739597	73148318	9.0733e-09	0.0249661644789013
ARMC7	rs820263	17	A	G	31569	0.0500160569481849	0.693005963614403	73594660	6.7673e-09	0.00862821849092342
gene	SNP	chr	effect_allele	other_allele	samplesize	beta	eaf	pos	pval	se
ARPC1B	rs10231522	7	C	T	31251	0.116516231685232	0.120106459284986	99611922	2.8146e-21	0.0123042400613787
ARPC1B	rs10239195	7	C	G	31246	-0.0513325	0.71437471681015	98784835	6.7673e-09	0.00885577198896026
ARPC1B	rs13309270	7	G	T	26018	0.128807573427352	0.0666400075272864	99578167	2.3396e-13	0.0175774527056976
ARPC1B	rs138791019	7	A	G	27306	0.185948632670537	0.0181370353784147	99767773	6.6791e-09	0.0320661906000339
ARPC1B	rs141376982	7	T	C	29762	0.0760905807932244	0.10392	99861149	1.4702e-08	0.0134317000517607
ARPC1B	rs142520867	7	C	A	29708	0.148878110982829	0.0282074978904649	99949801	1.8759e-09	0.024778741238425
ARPC1B	rs143524414	7	A	G	30836	0.209787240080644	0.0667331441282504	98965615	1.1981e-38	0.0161354940992373
ARPC1B	rs2003499	7	C	T	29900	0.296051756588881	0.112798479388587	99014984	4.4175e-116	0.0129266695450643
ARPC1B	rs76879813	7	G	A	28160	0.118324712353864	0.0820857434501531	98890237	1.278e-14	0.0153508967765781
ARPC1B	rs77612212	7	G	A	30429	-0.252687	0.966435500837652	99007205	2.9983e-29	0.0225068459846051
ARPC1B	rs7795644	7	T	C	28079	0.158231729692675	0.040777569136224	98868696	1.2071e-13	0.0213365331300803
gene	SNP	chr	effect_allele	other_allele	samplesize	beta	eaf	pos	pval	se
ARRB2	rs11078528	17	A	G	30390	-0.148497	0.287236471573179	4542717	1.2478e-61	0.00896452176522176
ARRB2	rs111799880	17	G	T	25821	-0.36933	0.014786494080796	4558811	4.0582e-24	0.036458658780942
ARRB2	rs11568110	17	T	C	22781	0.396799784864217	0.0247736890031603	4539673	1.3954e-39	0.0301405077754817
ARRB2	rs11657711	17	T	C	29578	-0.112402	0.0640854472630174	4463962	2.1508e-11	0.0167881480273895
ARRB2	rs12150045	17	T	C	29939	-0.138096	0.794730320981918	4532939	2.0523e-42	0.0101179857645357
ARRB2	rs12451546	17	T	C	25141	-0.102448	0.0768938133054353	4628844	9.3224e-10	0.0167387181959339
ARRB2	rs139244790	17	A	G	22860	-0.164131	0.0260294431406017	4620216	2.297e-08	0.0293725421968492
ARRB2	rs146174946	17	A	C	24576	0.458953624894997	0.0224051993745113	4588600	3.0222e-51	0.0304772343859775
ARRB2	rs151021726	17	A	G	16108	0.261487767092403	0.0177813613987438	4670701	5.5609e-10	0.0421577672415444
ARRB2	rs188900185	17	T	C	17011	0.371005178746732	0.0217071090782231	4627837	2.0171e-23	0.0372035717684718
ARRB2	rs1986349	17	A	G	30391	0.164976185754271	0.5463107424179	4628585	3.6252e-91	0.00814729400441849
ARRB2	rs2255888	17	C	T	30591	0.437572101242579	0.237678915366895	4545581	1e-200	0.00949781860186015
ARRB2	rs2304969	17	T	G	29470	-0.0648591	0.840701159397429	4692559	8.2828e-09	0.0112555780428269
ARRB2	rs2304973	17	A	G	30392	-0.129441	0.0809170471841705	4642222	3.2322e-18	0.0148733224479295
ARRB2	rs2586527	17	G	A	30597	-0.0643864	0.786728336794412	4825361	6.8365e-11	0.00986885128215284
ARRB2	rs34104097	17	T	C	11714	-0.268034	0.0247025154390721	4545373	1.9151e-10	0.0420913883244234
ARRB2	rs34183984	17	T	C	23725	-0.12173	0.074618875235813	4626224	3.2148e-12	0.0174701737375784
ARRB2	rs34994526	17	G	A	29114	-0.0760991	0.705743540516759	4518502	5.8505e-17	0.00909384619781368
ARRB2	rs4790656	17	T	C	27501	-0.0698438	0.132882979178246	4502083	2.6947e-08	0.012561376285617
ARRB2	rs4790694	17	A	C	27869	-0.233771	0.142989434692933	4626354	3.6324e-83	0.0120998293922565
ARRB2	rs4790702	17	G	A	30392	-0.0872128	0.468245814307458	4665454	7.4076e-27	0.00812854756508704
ARRB2	rs55670980	17	T	C	21338	0.194597053508029	0.060315801695112	4497969	1.0649e-21	0.0203330080463956
ARRB2	rs56376949	17	T	G	16741	0.603597995095661	0.0174598147121704	4582795	1.9927e-47	0.0417252865405544
ARRB2	rs58209386	17	T	C	25948	-0.0823359	0.104025462538927	4647044	1.0258e-08	0.0143785600632915
ARRB2	rs7215121	17	A	G	20461	-0.0613026	0.384396599180378	4461748	1.6134e-09	0.0101620493800194
ARRB2	rs7218698	17	G	T	30392	0.142829608323946	0.340068493150685	4652936	1.7778e-62	0.00856195087633579
ARRB2	rs74574706	17	T	C	30602	0.11074697161363	0.0971876179690449	4807150	4.8339e-16	0.0136460159460835
ARRB2	rs76960659	17	A	G	24191	-0.16085	0.0339160316748842	4566769	1.5096e-10	0.0251158648660995
ARRB2	rs77627231	17	T	C	30392	-0.0990283	0.179642313546423	4551122	7.0767e-21	0.0105657277596629
ARRB2	rs8076142	17	C	T	26435	0.205178493077303	0.179142588361779	4512515	3.7386e-73	0.0113412796801392
ARRB2	rs8077825	17	G	A	30381	-0.0639579	0.139422893905364	4492197	4.7293e-08	0.0117117563610334
ARRB2	rs9894403	17	A	G	27710	-0.151608	0.105030087295534	4629525	7.2102e-28	0.0138549721894336
gene	SNP	chr	effect_allele	other_allele	samplesize	beta	eaf	pos	pval	se
ARRDC4	rs113180470	15	T	C	9082	-0.359789	0.0197093151288262	98449522	1.5817e-11	0.0533803047391506
ARRDC4	rs116887089	15	A	G	24281	0.643274428753883	0.0181336381585784	98502647	8.5496e-80	0.0340081536509536
ARRDC4	rs117228705	15	T	G	22969	0.43669487771823	0.0275511344584777	98616539	5.6045e-53	0.0285043294007448
ARRDC4	rs117303859	15	G	T	29155	0.339161325206022	0.0207918739635158	98706038	1.5065e-31	0.0290231240388863
ARRDC4	rs117604524	15	T	C	27960	0.16782011602878	0.0232029713786323	98625163	2.3094e-09	0.0280893992850916
ARRDC4	rs117856007	15	C	T	2003	0.812934081750582	0.0204692960559161	98485629	3.2024e-13	0.111579406474406
ARRDC4	rs12324081	15	G	A	31191	-0.107423	0.19043431717388	98670170	5.9583e-26	0.0101969831380654
ARRDC4	rs12441557	15	C	T	27158	0.0731963231367123	0.182954391357411	98672792	4.2411e-11	0.0110979187531972
ARRDC4	rs12908061	15	G	A	25119	0.570083401570851	0.0312562362801836	98473744	1.5969e-109	0.025639587198761
ARRDC4	rs12914697	15	T	C	30143	0.0645482314629956	0.407619085550422	98418702	6.8186e-15	0.00828827173730988
ARRDC4	rs139991842	15	C	G	26504	0.258708843633041	0.0228236061297685	98486409	5.8314e-19	0.0290837682408734
ARRDC4	rs143996163	15	A	G	18149	-0.263076	0.0155270001529754	98499494	5.7623e-10	0.0424534479669591
ARRDC4	rs2172123	15	A	G	27095	-0.220492	0.0740707162284678	98512207	3.4304e-41	0.0164031872544396
ARRDC4	rs28618239	15	C	T	28548	-0.0797666	0.81193382384213	98404924	9.4766e-14	0.0107098032886512
ARRDC4	rs34886129	15	T	G	31527	-0.1202	0.44396421561226	98703222	7.7278e-51	0.00801527310137621
ARRDC4	rs36067982	15	C	T	28964	0.474596849709917	0.114024823435998	98586859	1e-200	0.0130720966920137
ARRDC4	rs4965520	15	A	G	30950	-0.125657	0.0743391857997299	98707938	2.384e-16	0.0153221544500422
ARRDC4	rs57666802	15	T	G	31636	-0.11485	0.110672531107853	98627370	1.2645e-19	0.0126719498104634
ARRDC4	rs60607215	15	T	G	29706	-0.121216	0.0423168902760326	98664628	2.7144e-09	0.0203795751980932
ARRDC4	rs62026164	15	A	G	27940	-0.218099	0.031117428383993	98583023	3.4847e-19	0.0243632027835523
ARRDC4	rs6496271	15	G	T	31642	0.39434843602355	0.443379561769459	98513629	1e-200	0.00800176199809568
ARRDC4	rs7172170	15	T	C	31644	-0.149426	0.554605584576647	98583617	6.7575e-78	0.00799787866840041
ARRDC4	rs7183687	15	T	C	26290	-0.06755	0.845871559633028	98310146	2.2318e-08	0.0120780300464509
ARRDC4	rs72756716	15	A	C	29621	-0.272424	0.0541161636703815	98561201	7.124e-51	0.01815945210918
ARRDC4	rs73463441	15	C	G	30368	0.222260836712826	0.0729878024710851	98496082	4.613e-46	0.015599441094387
ARRDC4	rs75889891	15	A	G	29660	-0.176301	0.0514338010982306	98628989	2.4331e-21	0.0185883694568181
ARRDC4	rs77131116	15	G	A	24416	-0.193513	0.0268600382606897	98622559	4.7184e-12	0.0279902499696751
ARRDC4	rs78820833	15	C	T	29101	0.486033911605498	0.0357766143106457	98508700	3.7346e-105	0.0223173485352621
ARRDC4	rs8024983	15	C	A	31192	-0.153322	0.161906946515273	98528834	3.4586e-45	0.010868873381832
ARRDC4	rs8042240	15	G	A	31191	-0.102462	0.13125095580364	98455969	5.5431e-18	0.0118569215267163
ARRDC4	rs965697	15	T	C	31315	-0.158602	0.423649162861492	98665055	1.1929e-85	0.00808652909971378
gene	SNP	chr	effect_allele	other_allele	samplesize	beta	eaf	pos	pval	se
ARSA	rs1053744	22	A	G	21799	0.063660900136814	0.481520840713189	50885775	3.103e-11	0.00958503096147281
ARSA	rs111977147	22	T	C	26407	0.230761353308491	0.0328599275967697	51090768	3.2675e-21	0.0244088590341116
ARSA	rs1134848	22	T	C	26582	-0.291544	0.106141522029372	50873497	3.0709e-95	0.0140803722956535
ARSA	rs117637509	22	A	G	28273	-0.460565	0.0350888433282078	51000015	2.5742e-90	0.0228544547965756
ARSA	rs11912237	22	A	G	30515	-0.828785	0.0827941061822718	51060049	1e-200	0.0146890999396214
ARSA	rs12628844	22	G	A	25363	0.130312575668516	0.581235976977856	51144168	1.6304e-47	0.00899961157395239
ARSA	rs131715	22	A	G	30185	0.21636255680284	0.436581898594219	51066921	3.3822e-153	0.00820618212998808
ARSA	rs131780	22	G	C	6479	-0.109855	0.69480056980057	50982539	8.4814e-09	0.0190769556471533
ARSA	rs131811	22	A	G	28910	0.16334742344702	0.0724354443012183	50962259	2.4107e-24	0.0160440246186128
ARSA	rs137930	22	C	T	30508	0.0615966766205266	0.336901002066519	50523433	6.413e-13	0.00856520567621868
ARSA	rs142730749	22	A	G	4263	-0.489545	0.0155993431855501	50490814	2.1238e-08	0.0873953311145334
ARSA	rs143148305	22	A	G	28909	-0.191939	0.0495675316034597	50528292	1.2756e-23	0.0191606037455533
ARSA	rs147264558	22	C	T	17225	-0.567003	0.0200177935943061	50730319	3.5573e-49	0.0384669885602573
ARSA	rs2294381	22	G	A	26881	-0.087697	0.0897593097184378	50497694	6.1583e-09	0.0150884426617449
ARSA	rs2301584	22	A	G	23049	0.0760770445539596	0.17481306355839	51171497	5.5186e-10	0.0122629750401302
ARSA	rs28645770	22	G	T	21771	0.0752806813392002	0.213660555884092	50739989	1.2042e-10	0.0116917253741691
ARSA	rs2878117	22	C	T	29879	0.0523895383099603	0.344551922615717	50866559	1.1577e-09	0.00860806399992775
ARSA	rs3091397	22	G	A	22820	-0.094009	0.213263544740798	50957520	1.926e-16	0.0114275790193657
ARSA	rs3747273	22	A	C	17662	-0.12232	0.207796265916725	50925997	1.083e-20	0.0131137756608337
ARSA	rs4824114	22	C	G	23322	0.0608596366002321	0.271978766047343	51045744	4.9573e-09	0.0104054911435221
ARSA	rs4824128	22	C	T	19400	0.153178675144238	0.124974207304491	50931486	1.9103e-23	0.0153519488408505
ARSA	rs5770804	22	C	A	23346	0.151273924457109	0.947227481741953	51058500	2.7074e-13	0.0206989210154357
ARSA	rs5770892	22	G	A	25277	0.152584677493633	0.763592280564263	50999681	3.969e-48	0.010467926064984
ARSA	rs5770979	22	A	G	10267	-0.306195	0.0326489086200518	51089994	6.3096e-15	0.0392678229321505
ARSA	rs5770988	22	A	C	30185	0.115782714430372	0.114042015479387	51126242	1.5299e-19	0.0128041397861646
ARSA	rs5771259	22	A	G	30177	-0.126385	0.144533101595829	50675962	9.4555e-28	0.0115760849386758
ARSA	rs59650998	22	A	C	27244	-0.146857	0.0607157217531162	50582868	2.6871e-16	0.0179390920672473
ARSA	rs6010008	22	C	G	20235	0.127966237228941	0.0596136334070509	50998796	1.0944e-09	0.0209945920115731
ARSA	rs6010045	22	T	C	30385	-0.211907	0.687725278169566	51103091	1.806e-129	0.00875345438451894
ARSA	rs6010063	22	G	A	22493	0.126725469466373	0.547924228675136	51156933	8.2185e-41	0.00947317242391016
ARSA	rs6010161	22	A	G	26115	0.0780632380562177	0.24569492801355	50492121	1.5884e-14	0.0101640870872515
ARSA	rs6151413	22	A	C	16482	0.449649773613583	0.0174892609800999	51065524	1.0025e-26	0.0420170604034521
ARSA	rs7292558	22	G	A	18791	-0.0808723	0.196195262024408	50454825	4.7849e-10	0.0129894426669758
ARSA	rs73172241	22	T	C	22282	0.117457064809353	0.144653004993973	50955615	2.743e-18	0.0134670669826587
ARSA	rs73174417	22	T	C	28996	0.14322894423696	0.0541744354671639	51145781	5.8287e-15	0.0183448107276192
ARSA	rs9616807	22	A	G	24737	0.136654246729484	0.0984856107868786	51087348	1.3433e-19	0.0150882462989383
ARSA	rs9616897	22	A	C	30186	0.140879207669565	0.23360315893386	51083118	1.4246e-48	0.00961869180614795
ARSA	rs9616948	22	G	A	17664	-0.10387	0.137467780988831	51152554	1.7851e-11	0.0154508490506785
ARSA	rs9616968	22	G	A	12244	0.216821376497361	0.0603628190720822	51211031	6.4449e-16	0.0268323362742075
ARSA	rs9628247	22	G	A	14068	-0.293976	0.0743999131095905	51195130	2.6624e-38	0.0227180428739681
gene	SNP	chr	effect_allele	other_allele	samplesize	beta	eaf	pos	pval	se
ARSG	rs11077558	17	C	G	31017	-0.108765	0.153766093593401	66428002	1.4849e-22	0.011130370095607
ARSG	rs111921212	17	G	C	28135	0.0541879525071258	0.744167389418907	66318641	2.0397e-08	0.00966158266004454
ARSG	rs11653860	17	T	G	31684	-0.0988087	0.0796910819647488	66205240	1.6281e-11	0.0146687572970237
ARSG	rs117977010	17	A	G	21364	-0.495749	0.0215482841181165	66308930	4.4583e-50	0.0333171367461559
ARSG	rs17672144	17	T	G	31492	-0.220214	0.04945678918878	66429511	4.3625e-33	0.0183774813086667
ARSG	rs34903213	17	G	A	31239	0.0631513308536144	0.164978596544871	66478512	4.6679e-09	0.0107788849002551
ARSG	rs3744301	17	T	C	31684	0.0998907627974986	0.058908639933857	66366739	3.2077e-09	0.016871729689136
ARSG	rs3785602	17	A	G	31684	-0.0726169	0.455466195648089	66356883	8.7386e-20	0.00797672283983766
ARSG	rs4968882	17	G	A	30902	0.104252189024803	0.737058117473961	66310599	3.7445e-30	0.00913715426565141
ARSG	rs59133474	17	C	T	31355	0.162086986626859	0.552359208523592	66421203	1.3755e-90	0.00803074753022841
ARSG	rs62084752	17	C	G	27526	-0.0585476	0.229588882455124	66089393	7.5864e-09	0.0101339032033223
ARSG	rs62085931	17	T	C	31236	0.0849387393483531	0.0943389014181415	66445647	5.4558e-10	0.0136876543950291
ARSG	rs72841860	17	G	A	31160	-0.18117	0.0394287904926203	66390394	1.3464e-18	0.0205832887876325
ARSG	rs74435324	17	T	G	25788	-0.354038	0.0337952010814464	66347126	7.9371e-48	0.0243676730464812
ARSG	rs77734709	17	T	C	27780	0.157553157785142	0.0362255009909712	66379913	3.9489e-12	0.0227051285880217
ARSG	rs8065201	17	T	C	31355	-0.104817	0.2662100456621	66323939	4.0634e-31	0.00903511113060481
ARSG	rs8068710	17	A	G	27092	-0.200491	0.0257301176363719	66368184	1.4771e-13	0.0271333829363578
ARSG	rs9890694	17	T	C	31569	-0.0959232	0.0919453461161018	66315468	3.2934e-12	0.0137731640183284
ARSG	rs9905949	17	T	C	31355	0.118806667747176	0.0523782343987823	66290903	3.398e-11	0.0179241536664266
gene	SNP	chr	effect_allele	other_allele	samplesize	beta	eaf	pos	pval	se
ARVCF	rs165599	22	G	A	27397	-0.133658	0.308776095331959	19956781	2.3517e-47	0.00924703044113166
ARVCF	rs174689	22	A	G	31349	-0.0985135	0.0630280886047043	19939353	2.0399e-09	0.0164339818092493
ARVCF	rs174692	22	C	G	30902	0.0519641239001055	0.531885236380532	19940027	1.1484e-10	0.00806132760895821
ARVCF	rs41458445	22	A	G	24161	0.0857577546482499	0.124148590589961	19998088	5.0934e-10	0.0137956267632273
ARVCF	rs62223683	22	A	G	21723	0.217127165966026	0.0728616049975973	19959227	6.0688e-32	0.0184587994326203
ARVCF	rs654389	22	G	C	23209	-0.0547581	0.364067497518474	20193861	1.374e-08	0.00964629018444379
ARVCF	rs696884	22	A	G	23979	-0.063001	0.521847228099873	20183509	5.5013e-12	0.00914143633431678
ARVCF	rs73877146	22	C	T	28377	-0.0797272	0.0937902325980603	20136606	3.0699e-08	0.0143982127413446
ARVCF	rs75314165	22	T	C	22130	-0.28469	0.0190853122251539	19998486	2.5059e-16	0.0347399382269065
ARVCF	rs76584826	22	T	G	31569	-0.0692042	0.176417302030648	20068503	3.3934e-11	0.0104407186887005
ARVCF	rs9306234	22	C	A	23208	-0.124169	0.395521976506921	19953188	4.2619e-39	0.00949271793474707
ARVCF	rs9606212	22	A	C	19945	0.0995657832913033	0.0935440484196369	20015615	7.0219e-09	0.0171943811161716
gene	SNP	chr	effect_allele	other_allele	samplesize	beta	eaf	pos	pval	se
ASAH1	rs10283201	8	T	C	31595	0.0579072343144937	0.229449472096531	18034030	9.3224e-10	0.00946088426397205
ASAH1	rs10503644	8	A	G	31684	0.335487689612239	0.454752151527679	17697376	1e-200	0.00797775396256237
ASAH1	rs11203936	8	G	A	31684	-0.0779468	0.704235409072118	17953421	3.3974e-19	0.00870428257743431
ASAH1	rs112393816	8	G	A	27870	-0.143906	0.0519192805439789	17673982	4.7723e-14	0.0190910373634451
ASAH1	rs112686215	8	A	G	27371	-0.238845	0.0200932902762827	17955165	4.4484e-15	0.030459430213021
ASAH1	rs114187511	8	C	T	30631	0.157058825762372	0.0321646580059477	17619640	6.9441e-12	0.0228988781947822
ASAH1	rs116993539	8	A	G	28270	-0.182939	0.0358266867859452	17537667	6.2266e-16	0.0226277421455047
ASAH1	rs117026820	8	C	T	29836	0.0953966568497012	0.0604377852267679	18391517	2.8081e-08	0.0171789913471216
ASAH1	rs11787012	8	C	T	29661	-0.199996	0.0276173432034491	18113519	1.4328e-15	0.0250543163691916
ASAH1	rs118003188	8	C	T	30021	-0.154228	0.0228894411929768	17948518	1.5878e-08	0.0272887081500116
ASAH1	rs12545528	8	T	G	31599	0.0721678942433226	0.597854773035741	18271948	5.8e-19	0.00811258057097985
ASAH1	rs13248171	8	A	G	24405	-0.324113	0.0257630625969995	17717418	7.8886e-30	0.0285702839083254
ASAH1	rs13270851	8	A	C	31564	0.161878637737773	0.05521159726679	17876145	1.5545e-20	0.0174263548101335
ASAH1	rs13278381	8	A	G	31567	0.4472691219487	0.378869092556243	17926357	1e-200	0.00820412347478062
ASAH1	rs13282108	8	C	G	31568	0.0985866421545179	0.124655569395689	18141830	2.7778e-16	0.0120480327216256
ASAH1	rs13282340	8	C	T	26701	-0.0758485	0.810968278923518	17603949	6.7524e-12	0.011052282090425
ASAH1	rs1353037	8	C	T	28588	0.0664114310689621	0.78186535108238	18193852	5.4534e-11	0.0101266267774145
ASAH1	rs138892153	8	G	T	31238	0.156184672235975	0.0210220540457899	17587912	2.141e-08	0.0278881280329931
ASAH1	rs139094450	8	A	G	21215	0.336193238052147	0.0151486988847584	17980149	2.7061e-17	0.0397457307417477
ASAH1	rs139903805	8	T	C	22149	0.285193419916303	0.0231345906055992	18153793	1.8201e-19	0.031605281696474
ASAH1	rs140019911	8	C	T	21911	0.226951972732502	0.0165419339510573	17806200	1.3646e-09	0.0374526746757269
ASAH1	rs144123383	8	A	G	24745	0.393234786706646	0.0213523131672598	17818169	1.1802e-36	0.0310960782794798
ASAH1	rs147915438	8	A	G	24117	-0.303411	0.0257325911143787	17832993	5.0259e-26	0.0287569295500817
ASAH1	rs1493039	8	C	G	31340	0.0855722133049508	0.566761850371216	18183547	2.5163e-26	0.00806068324274216
ASAH1	rs1493042	8	A	C	31684	0.101761327769736	0.193111353301515	18205516	4.8976e-24	0.0100636214887296
ASAH1	rs17467420	8	T	G	26554	-0.304246	0.0403650076819219	17780385	2.5627e-43	0.0220477598133271
ASAH1	rs17515264	8	C	T	31569	-0.346537	0.108420774514985	17917866	2.0591e-161	0.0128002474882869
ASAH1	rs17517068	8	G	A	31240	0.105058673022095	0.0467418306898529	18278665	2.9699e-08	0.0189527119754104
ASAH1	rs17592494	8	G	A	31568	0.404316866591271	0.0468614350960631	17798395	2.9321e-102	0.0188310985012725
ASAH1	rs185743521	8	A	G	10661	-0.40241	0.0161117078410312	17887723	1.3784e-13	0.0543929163982431
ASAH1	rs191912559	8	A	G	24500	-0.193584	0.0213384813384813	18212539	5.918e-10	0.0312610780149714
ASAH1	rs1968042	8	C	T	27155	0.182165677735998	0.725475543478261	17616580	4.8009e-80	0.00961519707668261
ASAH1	rs209977	8	G	A	25347	0.172946596934386	0.0266130623520126	17590214	3.676e-10	0.027595072349239
ASAH1	rs2201554	8	A	G	31355	-0.0865908	0.0927321156773212	18295044	3.1829e-10	0.0137672990613736
ASAH1	rs2517215	8	C	T	31568	0.0504563371204373	0.658362586343562	17477678	1.8257e-09	0.00839162724240978
ASAH1	rs28383681	8	G	A	29595	0.169008952431856	0.0204119086460033	18054584	6.0925e-09	0.0290678073769595
ASAH1	rs28383685	8	T	C	31684	0.102311859647257	0.133300762899771	18054828	2.0592e-18	0.0116873076212582
ASAH1	rs2904725	8	C	A	17089	0.0750531435659729	0.549692025969702	17581937	5.0844e-12	0.0108720674990183
ASAH1	rs2979775	8	G	A	29420	0.050261659716363	0.699671390429246	17582137	2.2864e-08	0.00899328294380958
ASAH1	rs2979776	8	A	C	31684	0.088214862748949	0.480251042880229	17586321	1.3355e-28	0.00795122472837433
ASAH1	rs34771733	8	C	A	25213	-0.225758	0.0351325851623796	17817657	1.0214e-20	0.0241871036948937
ASAH1	rs366298	8	T	C	31684	0.0865294335080488	0.0769476492915931	17771154	6.4366e-09	0.014905761056321
ASAH1	rs3850743	8	G	A	25165	-0.24117	0.029019412643106	17783925	1.064e-19	0.0265544280807366
ASAH1	rs441517	8	A	G	31684	0.224691836933668	0.293998271261603	17908116	1.9744e-146	0.0087194628015704
ASAH1	rs4921565	8	C	G	4616	-0.283528	0.0792894280762565	17921810	1.8281e-13	0.0385196998612757
ASAH1	rs4921581	8	A	G	31300	0.132108422082192	0.667168732125834	18071095	1.0665e-54	0.00848170047459773
ASAH1	rs55831225	8	A	G	29384	0.451474906584142	0.0347813566991649	17939194	1.8851e-89	0.0225135216587699
ASAH1	rs58577175	8	A	G	31231	-0.146545	0.0464711729622266	17608548	1.2602e-14	0.0190078644472491
ASAH1	rs60429850	8	T	A	31567	0.232949147772162	0.0857428657707987	17931705	2.3375e-60	0.0142146172670345
ASAH1	rs62493051	8	T	G	30077	0.118736903582628	0.050755939524838	18284361	1.6352e-10	0.0185752798070504
ASAH1	rs62498240	8	A	G	27354	0.463209026094773	0.01802145518201	17912271	4.2992e-47	0.0321387257226058
ASAH1	rs62498369	8	C	G	31568	0.126962855654396	0.196750084928094	17631163	7.4219e-37	0.010011027625462
ASAH1	rs71526156	8	C	T	31112	0.165958985295562	0.0419979260283443	17629158	1.01e-16	0.019985908294463
ASAH1	rs73666900	8	T	C	26451	-0.199564	0.0174260853293413	18061546	1.8992e-09	0.033226257088646
ASAH1	rs76745328	8	C	A	25213	-0.302128	0.0246548813188996	17939675	6.9283e-26	0.028717202108589
ASAH1	rs77230387	8	A	C	28801	0.352523463499056	0.0218325887212341	18002471	4.0927e-35	0.028511627399998
ASAH1	rs77940935	8	T	C	29002	0.175882424658445	0.031742383081874	17921858	1.1193e-13	0.0236840409170835
ASAH1	rs77947374	8	T	C	31176	0.352968004489662	0.0370292325964522	17888333	3.3901e-62	0.0212078136240807
ASAH1	rs78337862	8	A	G	28534	-0.323327	0.0485314804552624	17835895	7.2292e-62	0.0194802574418325
gene	SNP	chr	effect_allele	other_allele	samplesize	beta	eaf	pos	pval	se
ASCC2	rs112674349	22	C	A	12905	0.278993472503123	0.0153256704980843	30790809	3.6708e-08	0.0506698883970728
ASCC2	rs11704738	22	C	T	31355	-0.0548107	0.470148401826484	29586058	7.3541e-12	0.00800086593369017
ASCC2	rs12373962	22	T	C	31567	-0.176068	0.172165181941718	30488136	1.276e-62	0.0105420200979017
ASCC2	rs132279	22	T	C	30901	-0.0591376	0.190254007589251	29539546	7.899e-09	0.0102484320192303
ASCC2	rs140932249	22	A	G	29834	-0.38278	0.0368350902702048	30260522	1.9998e-69	0.0217344204549819
ASCC2	rs1476576	22	A	C	31345	-0.0788549	0.214370003806624	30660517	5.3797e-16	0.00973217318826737
ASCC2	rs147697765	22	G	T	29083	0.283120886854698	0.0183688770409863	30860745	4.7831e-20	0.0308780550610425
ASCC2	rs150149236	22	T	C	29832	0.191631343102977	0.0361311952175142	29811791	2.4323e-18	0.0219378312005422
ASCC2	rs165633	22	G	A	30192	-0.0907379	0.244635107695983	29880773	9.2458e-22	0.00946675791248365
ASCC2	rs17711461	22	C	T	31684	0.530994104417431	0.0606937502348829	30218270	1e-200	0.0166375512892657
ASCC2	rs187668394	22	A	G	21767	0.188229784301453	0.0256581063077135	30407479	5.312e-10	0.030312218674244
ASCC2	rs2527341	22	A	G	30876	-0.108926	0.0969923646370296	30096914	1.1396e-15	0.0135975292306668
ASCC2	rs2857644	22	T	C	26759	0.164489516024959	0.0635030437188711	30060389	1.698e-20	0.0177255453808228
ASCC2	rs41278851	22	A	G	26366	0.207911070860311	0.027781691794655	30094366	4.2815e-15	0.0264973008169644
ASCC2	rs4820853	22	G	A	31295	-0.0601059	0.643554538520214	30864610	5.9249e-13	0.00834561413309692
ASCC2	rs4823084	22	A	G	31231	0.0836649902127682	0.293011163786512	30676851	1.7859e-21	0.0087911096157159
ASCC2	rs5749102	22	T	C	31684	-0.078825	0.285598857529407	30855674	3.1596e-19	0.00879459200691209
ASCC2	rs5753138	22	C	G	31231	0.115459460099663	0.25711117907937	30836392	1.8318e-36	0.00915523856380093
ASCC2	rs5763914	22	T	C	28496	-0.175878	0.0191067845096281	30657508	9.0199e-09	0.0305976718735624
ASCC2	rs5997591	22	C	A	31355	0.161169610885961	0.0654870624048706	30604667	1.7838e-23	0.0161421428314131
ASCC2	rs6006133	22	G	A	31355	-0.0518254	0.470966514459665	29814381	9.2823e-11	0.00800009241075398
ASCC2	rs6006267	22	A	C	31684	0.268849532199392	0.436149423127513	30216982	1e-200	0.00801060530900972
ASCC2	rs6006393	22	T	C	31684	-0.176288	0.116445563531136	30590026	5.6042e-46	0.0123847393387347
ASCC2	rs67087719	22	T	C	31239	-0.143109	0.0472978137899404	30615511	3.1162e-14	0.0188467871648184
ASCC2	rs7290441	22	T	A	26892	0.0844626520215549	0.169569601686758	30668047	1.9761e-13	0.0114907355991504
ASCC2	rs74916285	22	G	A	31238	0.260120286864529	0.0330046248518901	29955623	3.4498e-31	0.0223946249226907
ASCC2	rs77334376	22	G	A	28997	0.13691162715918	0.0831243207089708	30250360	8.852e-20	0.0150414320731222
ASCC2	rs78197964	22	G	A	29833	0.115503003561494	0.0763389611438727	30596321	6.8039e-14	0.0154172566754978
ASCC2	rs78858203	22	C	T	24091	-0.215289	0.0188788388725284	29625946	1.2627e-10	0.0334740782504778
ASCC2	rs9537	22	T	C	31563	-0.068491	0.774803684687406	29655416	6.5651e-13	0.00952838695096575
gene	SNP	chr	effect_allele	other_allele	samplesize	beta	eaf	pos	pval	se
ASL	rs10274919	7	C	T	30638	0.0810597045574363	0.455756366623636	64956181	1.6323e-23	0.00811132392953713
ASL	rs117007008	7	A	C	13310	0.270151559213755	0.0225258044930176	66055764	6.1437e-11	0.0413050515585828
ASL	rs117888257	7	G	A	24986	0.142827806432632	0.0483652252523731	66217774	7.4057e-12	0.0208513834612152
ASL	rs137968671	7	A	G	25627	-0.161433	0.0404340210198521	65709067	6.0656e-13	0.022424627134249
ASL	rs142902809	7	T	C	12317	-0.319982	0.0247169290251312	65538182	6.3096e-15	0.0410364641487852
ASL	rs145052843	7	C	T	15206	0.240522110547609	0.0268976409041556	66047790	1.1544e-11	0.0354438712861198
ASL	rs148177278	7	A	G	24143	-0.188402	0.0221050975456262	65553268	1.1519e-09	0.0309525957686441
ASL	rs148258877	7	C	T	13233	-0.25264	0.0259867614611424	65937944	6.1932e-11	0.0386364607120423
ASL	rs1709470	7	A	G	11489	-0.328104	0.905788475951153	64557394	7.9371e-48	0.0225828358248745
ASL	rs2901443	7	A	G	31562	-0.116699	0.147713972892362	66488027	2.3974e-25	0.0112175824601768
ASL	rs34735820	7	T	C	27764	0.110503394739193	0.0470492309048438	65538511	3.5157e-08	0.0200416045013681
ASL	rs73136336	7	A	G	30902	0.0933321421164935	0.112130715917451	65565028	2.4613e-13	0.0127483768991673
ASL	rs74838615	7	A	G	20718	0.148287843212288	0.0351594962603081	66245286	2.707e-08	0.0266723942751795
ASL	rs76033962	7	T	C	27967	-0.127877	0.952974838371483	65424355	1.5295e-10	0.0199735929744196
ASL	rs7781880	7	T	C	31233	-0.194003	0.609469378392844	65760297	1.0336e-123	0.00820114820317575
ASL	rs7796575	7	G	A	30480	0.0571998622165443	0.277307616610903	66466730	2.5787e-10	0.00904731857339011
gene	SNP	chr	effect_allele	other_allele	samplesize	beta	eaf	pos	pval	se
ASNS	rs10081358	7	T	C	30077	-0.121162	0.889288856891449	97545241	1.1161e-20	0.0129942330508449
ASNS	rs10263203	7	T	C	31569	-0.0622037	0.823129765229863	97019275	2.4614e-09	0.0104302101846325
ASNS	rs10953254	7	G	A	31558	-0.061023	0.241419023524525	97914305	5.352e-11	0.00930129777122083
ASNS	rs111427138	7	A	G	19831	-0.652039	0.0265993494171862	97592354	5.9208e-97	0.0312055162357993
ASNS	rs112828477	7	A	G	25265	0.192954887582691	0.0174591381872214	97668021	1.3407e-08	0.0339655490472797
ASNS	rs113542579	7	G	A	23163	0.469613319040707	0.0161432994250332	97380734	3.6267e-37	0.0368659579727994
ASNS	rs116960504	7	T	C	26277	0.140822548667986	0.0429676445618338	97663614	5.8941e-11	0.0215111202425702
ASNS	rs117025842	7	A	G	24505	0.625264886470233	0.0240864642305713	97623411	5.9066e-100	0.0294622188831827
ASNS	rs117064223	7	C	T	24832	0.497024394873936	0.0205496785949284	97582491	1.209e-55	0.0316289976501467
ASNS	rs117303656	7	T	C	23113	0.277011309946402	0.017823483756514	97664478	3.2738e-15	0.0351532734288146
ASNS	rs117465946	7	A	G	17402	0.251163376261084	0.0187393526405451	97123485	2.1006e-10	0.0395290099405223
ASNS	rs117532461	7	A	C	23714	-0.211015	0.0151832179837974	97928299	1.914e-08	0.0375511256770981
ASNS	rs117546412	7	T	C	27309	0.0835310733316468	0.106863362417919	97586202	1.6315e-09	0.0138502857455889
ASNS	rs117723999	7	T	G	19899	0.237048490893828	0.0171343766864544	97097419	8.42e-10	0.0386267481780423
ASNS	rs117732815	7	A	G	20612	0.166226129549156	0.050234923086825	98089427	1.6834e-13	0.0225483084033038
ASNS	rs118044428	7	T	G	10281	-0.35018	0.0146945831732616	97327016	1.5203e-09	0.057956646957555
ASNS	rs12056236	7	C	T	27979	0.109053654211713	0.777178658749563	97183636	6.9568e-27	0.0101585116450288
ASNS	rs1229537	7	C	A	31567	0.126839242591479	0.360203080175147	97464192	7.6928e-53	0.00829036331613109
ASNS	rs12667069	7	T	C	31351	-0.180066	0.0937737859643781	97277547	1.8374e-39	0.0136993596588487
ASNS	rs12667967	7	T	C	30902	0.453730522822946	0.192201959189995	97510166	1e-200	0.0102084875900623
ASNS	rs12704920	7	T	C	31684	-0.0541445	0.232571686271562	97087089	8.4915e-09	0.00940302671325514
ASNS	rs12704923	7	T	C	29693	0.15376088767339	0.108822812576164	97204687	1.84e-31	0.0131769822068396
ASNS	rs139745046	7	C	T	25082	-0.579393	0.0349627630329385	97621796	1.388e-125	0.0243068684953287
ASNS	rs141523358	7	A	G	19313	-0.389657	0.0148604566872055	97642384	1.9326e-20	0.0420528251886835
ASNS	rs142664614	7	A	G	23159	-0.586206	0.0217042689670427	97530603	1.7712e-75	0.0318872774257938
ASNS	rs146824756	7	A	G	21242	-0.39863	0.0215253293746521	97290795	8.8318e-33	0.0334300944213128
ASNS	rs149378840	7	G	A	23384	0.609753707532197	0.0147468458135343	97513414	6.9068e-57	0.0383620771409461
ASNS	rs1614702	7	T	C	28917	-0.106105	0.260380840533512	97626161	4.1704e-29	0.00947544894590032
ASNS	rs183031696	7	T	C	22319	0.27697679882073	0.0182092321967061	97535452	5.1008e-15	0.0353991103242075
ASNS	rs185593355	7	A	G	7872	0.353129932670623	0.0171612441902038	97552394	8.695e-09	0.0613658758659525
ASNS	rs188024382	7	A	G	15821	-0.388284	0.0126558719523544	97186012	1.1542e-14	0.0502907053679849
ASNS	rs191766984	7	A	T	11548	0.381435995328756	0.021551058241928	97520342	3.8428e-17	0.0453135649083189
ASNS	rs2074891	7	C	T	31684	-0.314299	0.393062497651171	97486213	1e-200	0.00813321416855012
ASNS	rs2270595	7	A	G	28050	0.0875879266861409	0.900957562568009	97852899	5.755e-10	0.0141336958716401
ASNS	rs28701170	7	T	A	30077	0.502524260269415	0.109191264698824	97624319	1e-200	0.0130731896852808
ASNS	rs34262838	7	T	C	31563	-0.108625	0.267932648746602	97675148	1.2342e-33	0.00898685069401732
ASNS	rs34711649	7	G	A	24522	-0.150508	0.0615004885072248	97126656	1.1678e-15	0.0187953643920542
ASNS	rs35763039	7	A	T	30817	-0.0495844	0.695206277678502	97718650	1.4566e-08	0.00875044161663584
ASNS	rs3847052	7	G	A	26797	-0.0992178	0.101463953595433	97629056	4.045e-12	0.0143060016723932
ASNS	rs58823769	7	A	G	31559	-0.132198	0.288136233197402	97634963	3.9078e-51	0.0087887276017031
ASNS	rs58972096	7	G	A	12996	-0.544394	0.0243656104027269	97627998	1.0096e-41	0.0402298073555512
ASNS	rs61198277	7	G	A	27310	-0.589648	0.0645378907128401	97571568	1e-200	0.0174142056094454
ASNS	rs62478997	7	T	G	18051	-0.645334	0.0203837854500617	97555675	2.9428e-67	0.0372446559535499
ASNS	rs62500792	7	A	C	28304	-0.136128	0.0443626501356064	96949935	2.579e-11	0.0204129511230795
ASNS	rs6948093	7	T	C	26617	0.477890142341385	0.289689908086529	97580974	1e-200	0.00955464981238962
ASNS	rs6967728	7	A	G	31567	-0.0841169	0.81828476521214	97915637	3.6332e-16	0.0103209683074333
ASNS	rs6978862	7	C	T	31231	0.0962670640394293	0.107317632665545	97311710	9.5776e-14	0.0129273062307876
ASNS	rs73142309	7	A	G	24505	-0.249871	0.0189397838394236	97187908	4.6781e-14	0.0331376958416605
ASNS	rs75422942	7	T	C	23823	-0.152278	0.0332035417111158	98140894	2.5912e-09	0.0255697832111955
ASNS	rs75673791	7	G	A	31568	0.2514330117366	0.099837692975503	97280128	5.4009e-80	0.0132755886763959
ASNS	rs76165495	7	A	G	31683	0.146992257338294	0.10827570655442	97675415	1.3595e-30	0.012784714706527
ASNS	rs76576182	7	G	A	26124	-0.187723	0.0169604256734287	96656620	3.0144e-08	0.0338813955120379
ASNS	rs77767644	7	C	T	11889	0.293542635541115	0.0172439095978867	96972567	3.8063e-09	0.0498163148987891
ASNS	rs7783941	7	C	T	30631	-0.0601643	0.394330098606981	97174086	3.3981e-13	0.0082671621301399
ASNS	rs7784118	7	A	G	30962	0.183225317393571	0.321377525398849	97257092	1.3238e-100	0.00860495549680978
ASNS	rs7786331	7	T	C	21410	0.233616281272855	0.0158249158249158	97039751	1.6114e-09	0.038723069993843
gene	SNP	chr	effect_allele	other_allele	samplesize	beta	eaf	pos	pval	se
ATF3	rs3123535	1	C	G	30499	-0.109397	0.117325844449645	212806852	3.4744e-18	0.0125818688080614
ATF3	rs3795837	1	C	A	31469	0.152553016417267	0.111150781719784	212773328	2.4896e-33	0.0126815758275296
ATF3	rs4951454	1	T	C	31470	0.0959853419572058	0.222086512082378	212764579	1.3915e-23	0.00958980747092204
ATF3	rs76680358	1	T	C	31018	0.105012713144196	0.0779714799097756	212729377	2.336e-12	0.0149740072927701
ATF3	rs906367	1	A	G	31469	0.0595833851349656	0.643265183403488	212858411	8.0325e-13	0.00832100454360885
gene	SNP	chr	effect_allele	other_allele	samplesize	beta	eaf	pos	pval	se
ATG4C	rs10430118	1	A	T	31145	-0.07501	0.21378782075833	63418350	1.649e-14	0.00977303537557463
ATG4C	rs111650697	1	G	C	31525	-0.0726713	0.101226878067195	63490795	3.7127e-08	0.013203360915077
ATG4C	rs113092853	1	T	C	28360	0.137409571220325	0.0397642015005359	63312772	1.6097e-10	0.0214880402865381
ATG4C	rs1168100	1	C	T	30862	0.0609277486430057	0.307178534092229	63124542	2.8894e-12	0.00872502880425681
ATG4C	rs12406542	1	G	A	26961	0.142809323432224	0.0524263431542461	63281099	1.4551e-13	0.0193212727709908
ATG4C	rs140913800	1	G	T	24910	0.181055458261277	0.0242012578616352	63302932	5.2917e-10	0.0291540599103548
ATG4C	rs143438747	1	T	C	29792	-0.162382	0.058751060306176	63278549	1.1503e-20	0.017421079718012
ATG4C	rs41290148	1	G	T	29737	-0.124748	0.0435997085256255	63102007	5.2115e-10	0.0200805120420336
ATG4C	rs4915853	1	C	A	31644	-0.0914026	0.600623849073622	63191577	2.0212e-29	0.0081160920556255
ATG4C	rs6679582	1	T	C	31644	-0.217993	0.422187981510015	63296271	1.424e-161	0.00804809502972729
ATG4C	rs72669559	1	T	C	31194	0.148458517752353	0.0546274704690546	63271724	3.5585e-17	0.0176174250904677
ATG4C	rs72671709	1	T	C	30492	-0.142651	0.0685273205798012	63350033	5.5746e-19	0.0160278441318982
ATG4C	rs7556152	1	G	T	30640	-0.0874696	0.0743409490333919	63384292	1.3454e-08	0.0153993023220514
ATG4C	rs76269172	1	A	C	29097	-0.228824	0.0346189011719724	63230772	6.0303e-24	0.0226753949373784
ATG4C	rs79669031	1	A	G	25982	-0.225494	0.0199693882431721	62890274	6.4224e-13	0.031357866871566
gene	SNP	chr	effect_allele	other_allele	samplesize	beta	eaf	pos	pval	se
ATHL1	rs10160565	11	A	G	19557	-0.151768	0.879915119905916	335017	1.7217e-22	0.0155549754390818
ATHL1	rs11246050	11	A	G	11621	0.268031074883976	0.133422252818174	284257	6.8495e-44	0.0192905828883561
ATHL1	rs114879827	11	A	G	7376	0.361751986954818	0.0283351409978308	297182	3.0904e-13	0.049619640210523
ATHL1	rs11602705	11	T	G	13834	0.215045799901153	0.896812201821599	302663	1.4137e-27	0.0197626959675366
ATHL1	rs117469581	11	T	G	7376	0.363452140067007	0.0273183297180043	299262	6.2096e-13	0.0505082255266203
ATHL1	rs12252	11	G	A	13639	-0.373272	0.950692866045898	320772	1.22e-40	0.0279652522024093
ATHL1	rs12361394	11	C	T	18150	-0.0762339	0.311652892561983	379097	1.7272e-11	0.0113320207361668
ATHL1	rs12792519	11	G	A	18261	0.0724335625533535	0.34926893379333	553866	4.1338e-11	0.0109759463205724
ATHL1	rs12793187	11	T	C	25002	0.227078228112683	0.184685225181985	250877	1.9924e-86	0.0115244151274447
ATHL1	rs138097180	11	G	T	11763	0.294706976628764	0.0181501317691065	263823	1.5975e-09	0.0488386352400053
ATHL1	rs139686173	11	A	G	3403	-1.18424	0.0167499265354099	290050	4.6252e-36	0.0944529617447848
ATHL1	rs141016101	11	A	G	10358	0.284770657895796	0.0630913303726588	314873	2.1687e-23	0.0285767988174525
ATHL1	rs14408	11	C	T	10330	-0.213864	0.393659244917715	308314	5.5634e-51	0.014240204748886
ATHL1	rs144820680	11	C	T	4797	0.467807395845808	0.0225140712945591	267052	1.0652e-11	0.0688205069284013
ATHL1	rs149221168	11	A	G	15473	-0.235671	0.020551929166936	344253	4.0534e-09	0.0400664380219961
ATHL1	rs3020900	11	A	C	26280	-0.137735	0.200057077625571	247972	1.403e-36	0.0109034983290259
ATHL1	rs34467189	11	T	C	10975	0.267741520131678	0.242687927107061	284936	7.4637e-65	0.0157442222391126
ATHL1	rs3741411	11	A	G	26609	-0.131096	0.797361794881431	199256	5.2916e-34	0.0107840613275291
ATHL1	rs3809110	11	T	C	11515	0.649556716821207	0.0349544072948328	290494	2.9313e-73	0.0358779932625525
ATHL1	rs3817639	11	C	T	17847	-0.588244	0.143273379279431	286391	1e-200	0.0151077053919294
ATHL1	rs4758629	11	A	C	26163	-0.30224	0.0385085808202423	228514	2.2059e-40	0.0227190291301734
ATHL1	rs4758634	11	T	C	13885	-0.486166	0.0539791141519625	283438	7.1446e-75	0.0265551538099725
ATHL1	rs521922	11	G	A	26484	-0.218346	0.275770276393294	254421	1.0737e-111	0.00972257524341546
ATHL1	rs56069858	11	A	G	10802	-0.241961	0.721209035363822	299586	2.9796e-57	0.0151727041243002
ATHL1	rs6421982	11	C	T	23667	0.0761651515760508	0.435564287826932	339943	2.1005e-16	0.00927000615557499
ATHL1	rs6598047	11	T	C	10802	-0.102527	0.76499722273653	284538	1.661e-10	0.0160459889597613
ATHL1	rs6598058	11	T	C	17494	-0.0646328	0.6424202583743	248036	6.8566e-09	0.0111543527346935
ATHL1	rs7105970	11	A	G	13335	-0.529596	0.167866516685414	300134	1e-200	0.0163836233063716
ATHL1	rs7116383	11	G	A	13066	-0.711803	0.120924536966172	287070	1e-200	0.0189733221035205
ATHL1	rs7123166	11	C	T	6508	-0.404033	0.015980331899201	262272	7.4523e-09	0.0698982725828458
ATHL1	rs7481518	11	T	G	25742	0.191109947065652	0.254661642452024	240867	1.3272e-79	0.0101159192814764
ATHL1	rs9734276	11	A	G	13658	-0.228779	0.15419534338849	284039	1.8797e-42	0.0167540876373506
gene	SNP	chr	effect_allele	other_allele	samplesize	beta	eaf	pos	pval	se
ATL2	rs111804320	2	C	G	14383	0.213350803714292	0.036259131929523	38582808	1.3405e-11	0.031540706904527
ATL2	rs11674467	2	T	C	31355	0.108383138270191	0.583751902587519	38621456	8.0435e-41	0.00810105003178074
ATL2	rs13432312	2	C	T	31684	-0.0975047	0.146980344996054	38490324	3.5926e-18	0.0112190439555374
ATL2	rs142023131	2	A	G	29833	-0.280756	0.0332821714193392	38582969	8.9238e-35	0.0228234265813005
ATL2	rs146807955	2	A	G	22554	0.252669305087071	0.0156759540019452	38794340	2.6323e-11	0.0379041861816788
ATL2	rs147831705	2	A	C	23266	0.215759786642113	0.0176460887251938	38529500	8.9102e-10	0.0352099916188703
ATL2	rs162556	2	G	A	31684	0.0715748846478288	0.469502799804577	38306454	2.4321e-19	0.00795984037453612
ATL2	rs17412829	2	A	C	29143	0.21659321926138	0.0819760678078777	38348037	1.1483e-46	0.0150989703142845
ATL2	rs17492358	2	T	C	29384	-0.178755	0.0389773334978814	38585115	4.9871e-17	0.0213135929107396
ATL2	rs2008077	2	G	A	31678	0.0997375584887438	0.436924407021764	38512063	1.3673e-35	0.00800976216581624
ATL2	rs232560	2	A	G	31684	0.0723299931200217	0.53346612048555	38396462	1.0543e-19	0.00796287657925685
ATL2	rs2855655	2	T	C	31471	0.059438814783269	0.38278527049553	38304488	4.2235e-13	0.0082003800592234
ATL2	rs442206	2	C	A	30902	-0.0507236	0.583033259766911	38876467	5.0482e-10	0.00815819977072207
ATL2	rs56291343	2	A	C	31235	-0.098036	0.208696483180428	38657204	2.3363e-23	0.00984544008838269
ATL2	rs74693843	2	G	A	25252	0.349985646974812	0.0166278435842791	38510142	8.5219e-24	0.0347984734749999
ATL2	rs7604860	2	G	A	31684	-0.0932329	0.0648276898793641	38473627	7.5235e-09	0.0161338831540182
ATL2	rs7606492	2	T	C	31355	-0.0500098	0.70070395738204	38431610	9.7397e-09	0.00871994663719834
gene	SNP	chr	effect_allele	other_allele	samplesize	beta	eaf	pos	pval	se
ATOH8	rs10167018	2	T	C	31566	0.104339434517251	0.815012645804235	85746699	2.4507e-24	0.0102499567284495
ATOH8	rs10445963	2	G	T	31684	-0.0743964	0.464974256830396	86047213	9.5429e-21	0.00796458599742042
ATOH8	rs111399212	2	C	T	29111	0.178126239657645	0.0216550174737893	85931622	3.9498e-10	0.0284728643954037
ATOH8	rs111573338	2	A	G	27010	-0.24702	0.0252792341007522	85653428	2.0196e-19	0.0274094704404966
ATOH8	rs1130866	2	G	A	31300	0.0757965397837824	0.479408960915157	85893741	2.6933e-21	0.00800039473763021
ATOH8	rs116010068	2	A	C	27310	-0.401198	0.0394423206656173	85968805	2.039e-74	0.0219827083531058
ATOH8	rs11674181	2	T	G	31567	0.582084986990235	0.213989128793598	85946999	1e-200	0.00970416596352691
ATOH8	rs11686739	2	G	A	30736	0.178557635380671	0.0351701024901602	85641240	3.4918e-16	0.0218952110189538
ATOH8	rs11695312	2	T	C	31566	0.445631286086522	0.862745838209203	85910799	1e-200	0.0115656761808573
ATOH8	rs11885214	2	A	G	31569	0.724239871355537	0.0449913187891598	85917471	1e-200	0.0191993518747773
ATOH8	rs1254900	2	A	G	26096	-0.19362	0.230226854690374	85816334	2.147e-77	0.0103977330246949
ATOH8	rs13023294	2	A	G	31231	-0.0914396	0.0911072029362288	86812177	4.8197e-11	0.0139046278386302
ATOH8	rs13405197	2	C	T	30474	0.094897658803963	0.155439190519312	86584250	2.095e-17	0.0111795557288052
ATOH8	rs13424070	2	A	G	22621	0.19721354099951	0.0176963410463923	86352393	3.195e-08	0.0356586158824558
ATOH8	rs138686161	2	T	C	30282	0.564481870927962	0.0269171261951045	85772478	6.1434e-112	0.0251074996187257
ATOH8	rs140632197	2	T	C	14073	-0.304913	0.0197186101044553	86323303	1.1421e-12	0.0428724329197501
ATOH8	rs142960627	2	A	G	29795	0.577039183352049	0.0331310679611651	85921477	3.0191e-140	0.022888207754968
ATOH8	rs143386318	2	A	G	30546	-0.111935	0.0468572101605748	86549433	5.0052e-09	0.0191443502520012
ATOH8	rs144165468	2	G	A	3329	-0.434058	0.0392009612496245	85865406	6.2602e-12	0.0631485621456019
ATOH8	rs146947447	2	A	G	14875	0.342796871451816	0.0135714285714286	85544111	7.8642e-12	0.0501084432988577
ATOH8	rs148830187	2	C	T	8299	0.588208669109073	0.0128931196529702	85956599	1.2416e-17	0.0688035780502126
ATOH8	rs149569572	2	G	T	16756	-0.321906	0.020888040105037	85680905	3.5283e-17	0.0381974879207231
ATOH8	rs150465452	2	G	A	24487	0.308733112729445	0.0248300020605811	86443425	2.1289e-26	0.029039468817142
ATOH8	rs150664639	2	T	C	28247	0.351566332461848	0.0332513378215087	85691403	9.6276e-51	0.0234659145949705
ATOH8	rs150787249	2	A	G	27265	-0.289895	0.0172374943668319	85831634	1.2403e-18	0.0329018935610346
ATOH8	rs17430897	2	T	C	26375	-0.259547	0.0426995305164319	85912962	1.8884e-33	0.0215354069072213
ATOH8	rs180823482	2	A	C	22505	0.309530155076073	0.0339357429718875	85714898	1.3309e-32	0.0260323758285036
ATOH8	rs1835812	2	A	G	31017	0.0457597509018599	0.478027908411071	85365498	1.2483e-08	0.00803775638964007
ATOH8	rs1878902	2	C	T	31354	-0.0521567	0.439286121998554	86023425	9.0395e-11	0.00804626127935917
ATOH8	rs192668754	2	A	G	26563	0.0830399664869235	0.149153015636634	85715577	9.2188e-12	0.0121788053629772
ATOH8	rs3024798	2	T	G	30192	-0.401956	0.383624636700243	85894308	1e-200	0.00836879982336098
ATOH8	rs3024831	2	C	T	26427	0.29875233714326	0.0263207193705508	85884384	4.0302e-28	0.0271709127666603
ATOH8	rs34428052	2	A	C	25597	-0.504022	0.0429295390312835	85961352	3.1967e-118	0.0218042121615675
ATOH8	rs34619872	2	T	C	31230	0.145665668852201	0.854502007264385	85692263	1.028e-37	0.0113478599024805
ATOH8	rs35625755	2	A	G	24850	0.275993873010865	0.0173451327433628	86280058	9.5428e-16	0.0343583648305529
ATOH8	rs35929054	2	T	C	26881	0.103537866806389	0.0548931486746767	85085062	4.5514e-08	0.0189348890485523
ATOH8	rs36118887	2	T	C	31565	-0.13635	0.115269913174783	85653209	7.371e-28	0.0124628889155783
ATOH8	rs4832175	2	T	C	28917	-0.119692	0.504739535273886	85670488	5.8428e-47	0.00831683130431749
ATOH8	rs56309153	2	A	G	20187	0.156781354774231	0.491529910005294	85983820	6.9776e-56	0.00995500379543023
ATOH8	rs60525968	2	G	A	28418	-0.141797	0.0830441674163561	86029846	1.0748e-20	0.0152005559021558
ATOH8	rs6717128	2	G	C	30727	0.114676906499094	0.23189225011695	85681425	3.6487e-33	0.00955808153919383
ATOH8	rs6731223	2	C	T	31017	0.145312746805372	0.14919821139465	85605304	4.8276e-38	0.0112690965974945
ATOH8	rs6742829	2	G	T	27751	0.111134447049562	0.0604383489151526	86030951	4.4038e-10	0.0178125766616279
ATOH8	rs6756074	2	C	T	31684	0.108491678354302	0.859746702243602	85963780	2.4613e-21	0.0114399255930556
ATOH8	rs719023	2	T	C	31684	-0.0474003	0.593408245330527	85818488	4.5953e-09	0.00808740007973937
ATOH8	rs72838685	2	C	T	24705	-0.149859	0.0798777381558839	85999070	1.7042e-19	0.016594223095054
ATOH8	rs72840110	2	A	C	27135	0.089302016125841	0.0749546690843155	85384953	4.3065e-08	0.0163019379565245
ATOH8	rs72842051	2	T	C	31567	-0.0938969	0.0694360561678997	86053331	2.005e-09	0.0156567895329091
ATOH8	rs72842138	2	T	C	28448	-0.416798	0.0228468745988962	85948711	6.4954e-50	0.028058498111936
ATOH8	rs7425090	2	T	G	31669	0.174722096360701	0.204012183199218	85962143	2.9496e-70	0.00986021909608413
ATOH8	rs74974338	2	A	C	21610	-0.275577	0.0144844269730874	85703222	7.6476e-12	0.0402601337922752
ATOH8	rs75577639	2	T	C	25213	-0.331653	0.0417370145992651	85800960	3.5946e-50	0.0222674093551635
ATOH8	rs7566763	2	C	T	31684	0.0584548723166895	0.253335337667706	85471459	1.5578e-10	0.00913385923258375
ATOH8	rs75733177	2	T	C	28630	0.217205136376504	0.0249840798132031	85627586	4.9793e-16	0.0267754510393737
ATOH8	rs7609387	2	C	T	30077	-0.0754865	0.600631949444045	86010678	1.2144e-19	0.00832485868596726
ATOH8	rs79553963	2	A	G	24793	0.176254527875626	0.0231007201541739	85372669	3.7242e-09	0.029893915854075
gene	SNP	chr	effect_allele	other_allele	samplesize	beta	eaf	pos	pval	se
ATP5G1	rs112633488	17	A	C	24722	0.178721215517271	0.0209446734870464	46873555	1.2645e-08	0.0314052884510563
ATP5G1	rs117799601	17	C	T	27643	-0.17201	0.0254342431761787	46840867	1.9201e-10	0.0270132869473055
ATP5G1	rs12948439	17	G	A	28716	0.299506613487434	0.532295588173089	46967124	1e-200	0.00836297624597033
ATP5G1	rs137986555	17	A	G	25437	-0.147565	0.0770061879972498	46884543	7.0819e-19	0.0166299081236901
ATP5G1	rs1965488	17	C	T	29992	0.0601999147113536	0.518541557972469	47167470	1.7477e-13	0.00817167529236905
ATP5G1	rs2326016	17	G	C	31237	0.0598766759748208	0.509766072930204	46694415	7.3535e-14	0.00800319129261399
ATP5G1	rs2460419	17	A	T	31141	-0.12699	0.216450548607381	46948796	6.2227e-39	0.00972985064952024
ATP5G1	rs2597177	17	A	G	31684	-0.0508503	0.655830733962193	46060529	1.1899e-09	0.00836147844476208
ATP5G1	rs3107297	17	C	T	30077	0.0902836499605752	0.194024478041757	46828081	2.0159e-18	0.0103104722161337
ATP5G1	rs477298	17	T	C	25088	0.151996522550303	0.159458705357143	46861624	1.1616e-35	0.0121940602777664
ATP5G1	rs55681610	17	A	G	31562	0.112367488227792	0.0754332313965341	46934663	8.946e-14	0.0150713532234118
ATP5G1	rs61393816	17	A	G	31355	-0.122315	0.90732496194825	46667047	6.5669e-19	0.0137711048055019
ATP5G1	rs61745934	17	T	C	25159	-0.710592	0.0241485759808803	47021314	3.144e-132	0.02904027345583
ATP5G1	rs62065412	17	G	A	27310	-0.153106	0.114639082527547	46883545	4.1908e-30	0.013430668435729
ATP5G1	rs62067380	17	C	T	31300	-0.0808777	0.144766444232602	46000406	1.0777e-12	0.0113589062074007
ATP5G1	rs62078433	17	G	A	27310	-0.257936	0.0360917472453339	47165905	2.4845e-29	0.022940471993826
ATP5G1	rs72831882	17	G	A	25906	0.171261722245913	0.0528779223273007	46925170	2.6854e-18	0.0196311006700955
ATP5G1	rs7359557	17	A	G	31566	0.0784428102727246	0.115341059227662	46790978	3.0582e-10	0.0124593481905247
[truncated: 22,738 more rows]

## Sheet: Table S3
Table S3. Results of the Mendelian randomization methods of the eQTLs .
exposure	outcome	method	nsnp	b	se	pval	or	or_lci95	or_uci95
ABCA1	NPC	Inverse variance weighted	20	1.03672043260536	0.349395058637395	0.00300538230192423	2.81995360476971	1.42177503790803	5.59310588597356
ABCB4	NPC	Inverse variance weighted	11	-0.913191	0.396013605742041	0.0211129812286698	0.401241925394233	0.18463444242694	0.871966684968743
ABCC3	NPC	Inverse variance weighted	64	0.25885373360285	0.108480141184122	0.017024164230287	1.29544431099802	1.04731804836544	1.60235562207323
ABHD14A	NPC	Inverse variance weighted	4	2.81209474521704	0.950235829632741	0.00308273642830754	16.6447482327975	2.58475963506698	107.185070508901
ACAT1	NPC	Inverse variance weighted	20	0.510247666464199	0.15937831496935	0.00136720056651122	1.6657036828056	1.21879926993275	2.27647720782211
AKR1C3	NPC	Inverse variance weighted	20	-0.504782	0.2376970519993	0.0337005421247512	0.60363705697919	0.378829750245523	0.961850795304069
ANKRD10-IT1	NPC	Inverse variance weighted	5	0.574322303569293	0.265432859990784	0.0304858694848998	1.77592657990042	1.05556260322489	2.98789973002185
ANKRD10	NPC	Inverse variance weighted	34	0.355753681143528	0.180451278398264	0.0486705215865339	1.42725594491011	1.00207131770381	2.03284885645571
ANKRD16	NPC	Inverse variance weighted	3	2.97134535447009	1.38346568567985	0.0317332229599035	19.5181607850828	1.29660927951263	293.811409845483
ANKRD37	NPC	Inverse variance weighted	3	-3.20302	1.32183659633544	0.0153861375357264	0.0406392103733168	0.00304631798853898	0.542144787898123
ANO10	NPC	Inverse variance weighted	13	-0.925491	0.457930768169214	0.0432767547414439	0.396336611511171	0.161534634316249	0.972439813226829
APH1B	NPC	Inverse variance weighted	34	-0.880472	0.197404412609752	8.18665748184508e-06	0.414587282416037	0.281567125734598	0.610449868011686
ARHGAP11A	NPC	Inverse variance weighted	9	0.948419393857147	0.365345491225678	0.00943292154688724	2.58162589900323	1.2615513970243	5.28301288249126
ARHGAP26	NPC	Inverse variance weighted	8	1.60101918469338	0.623884689138312	0.0102816532915381	4.95808305255216	1.45966242609468	16.8412826942292
ARPC1B	NPC	Inverse variance weighted	11	-0.869316	0.37749712139976	0.0212877133589347	0.419238056028004	0.200045442542647	0.878603108314603
ARSA	NPC	Inverse variance weighted	40	0.300739159070468	0.15295609679212	0.0492778666738133	1.35085693680016	1.00094565620906	1.82309044690034
ATF3	NPC	Inverse variance weighted	5	-2.12343	0.73460042983941	0.00384522485958607	0.119621006801126	0.0283467284735881	0.504791418221242
ATHL1	NPC	Inverse variance weighted	32	-0.313073	0.111977804466201	0.00517641063731841	0.731196778892301	0.587106431757722	0.910650438391223
AUTS2	NPC	Inverse variance weighted	39	-0.572355	0.257864375085254	0.0264462474842728	0.564195435511723	0.340354095551032	0.935250944863495
BBS9	NPC	Inverse variance weighted	9	-0.967797	0.468242789894931	0.0387463040188338	0.379918896938625	0.151745068614648	0.951189844709909
BCCIP	NPC	Inverse variance weighted	9	-1.31939	0.636152313169864	0.0380785272860461	0.267299569912284	0.0768235689407798	0.930040885374245
C12orf73	NPC	Inverse variance weighted	4	-1.16845	0.558974402679887	0.0365863096165962	0.310847598460774	0.103929514660015	0.92972847785275
C17orf51	NPC	Inverse variance weighted	14	0.623979966192127	0.30545775558894	0.0410752029459727	1.86634125498981	1.02560508499231	3.39626795054653
CBX6	NPC	Inverse variance weighted	30	0.421796156179407	0.198755859200947	0.0338224366427374	1.52469769280083	1.03275983683652	2.25096190955007
CCDC88A	NPC	Inverse variance weighted	12	-1.28889	0.479181357113261	0.00715008635313568	0.275576897245047	0.107734648828122	0.704904384255849
CD14	NPC	Inverse variance weighted	26	-0.659558	0.277474769978218	0.0174540271791428	0.517079892410395	0.300169358645153	0.890735871049453
CD9	NPC	Inverse variance weighted	39	0.442037272535132	0.180387278711839	0.0142661815612528	1.55587373071167	1.09251044246242	2.21576194774168
CHPF2	NPC	Inverse variance weighted	13	0.777438273512415	0.391558286212404	0.0470890698897748	2.17589108199873	1.01003403927335	4.68746776507426
CITED4	NPC	Inverse variance weighted	40	-0.508579	0.147358982380039	0.000557905044674325	0.601349368025145	0.45049747464642	0.802714960184994
CLCN7	NPC	Inverse variance weighted	29	0.46970985705831	0.172731125785263	0.0065417831692443	1.59953003353504	1.14014659987388	2.24400645361185
CLHC1	NPC	Inverse variance weighted	59	-0.258185	0.10620160398021	0.0150538736809239	0.772452594995835	0.627294104840362	0.951201369360304
CLIC4	NPC	Inverse variance weighted	19	1.11672230367296	0.261584029302682	1.96283706153051e-05	3.05482498726911	1.8294540815214	5.10095104168078
CLMN	NPC	Inverse variance weighted	25	0.346298186834954	0.162444811174279	0.0330241329141682	1.41382413671307	1.0282993868047	1.94388785523229
CLTCL1	NPC	Inverse variance weighted	24	-0.551116	0.215203467719322	0.0104400031738846	0.576306557498407	0.377979870012928	0.878695598800815
COX11	NPC	Inverse variance weighted	24	-0.571685	0.250043577708172	0.0222342029038032	0.564573120826116	0.345842854767166	0.921640578562564
CRABP2	NPC	Inverse variance weighted	8	0.920610070451083	0.311025646744713	0.00307722027095138	2.51082170091268	1.36478895209267	4.61919449458291
CREBRF	NPC	Inverse variance weighted	20	-0.645189	0.222180758373445	0.0036855683688167	0.524563583718269	0.339370476394772	0.810815826663913
CSTA	NPC	Inverse variance weighted	50	-0.33652	0.147729606146715	0.0227300099192661	0.714251932042092	0.534689239858486	0.954116493088363
DCAF4	NPC	Inverse variance weighted	69	0.526013788337043	0.0920775951715124	1.11182628765115e-08	1.6921734848362	1.41275500435513	2.02685610311445
DDR1	NPC	Inverse variance weighted	27	0.380482678329613	0.169469660476004	0.0247593112450544	1.46299057288502	1.04950869358825	2.03937464208387
DDX60L	NPC	Inverse variance weighted	53	0.264540056521833	0.100674103384536	0.00859675166472748	1.30283160904979	1.0695294804763	1.58702516622859
DGAT2	NPC	Inverse variance weighted	7	-1.74535	0.580605359270948	0.00264635963249646	0.174584148665225	0.0559478691169696	0.544786163373583
DNASE2	NPC	Inverse variance weighted	46	-0.285261	0.131881822921009	0.0305405547558414	0.751817662567035	0.580567138994874	0.973582140260871
DNM1L	NPC	Inverse variance weighted	11	1.00595410291781	0.466408684743903	0.031020607414552	2.73451503736618	1.0961379866397	6.82174377744616
DNTT	NPC	Inverse variance weighted	5	1.67113822539426	0.737339625290288	0.0234242739375323	5.31821768388066	1.25351619684023	22.5632819140557
EEF1A1	NPC	Inverse variance weighted	42	0.336905347001197	0.138340843657411	0.0148782911464564	1.40060648586016	1.06796748298653	1.83685230073459
EGLN3	NPC	Inverse variance weighted	12	-0.951876	0.388828792994145	0.01436280624009	0.3860162174597	0.180147317814165	0.82714814713815
EID2B	NPC	Inverse variance weighted	6	-1.69434	0.687054633220507	0.0136595605197498	0.183720244730702	0.0477885996702754	0.706300844904301
EIF4E	NPC	Inverse variance weighted	16	0.995977613829665	0.274411737762367	0.000283969882893047	2.70736981011368	1.58111549561717	4.6358734128109
EXOC7	NPC	Inverse variance weighted	3	1.59377486324299	0.573556705548272	0.0054567284034614	4.92229489212485	1.59936027372087	15.1491739560783
FAM213A	NPC	Inverse variance weighted	34	-0.410232	0.196565562600814	0.0368883143938728	0.663496342231575	0.451355301803391	0.975345574530199
FAM49A	NPC	Inverse variance weighted	11	0.758035703320758	0.278043460347718	0.00640446948168186	2.13408013414604	1.2374719159721	3.68032434528354
FDFT1	NPC	Inverse variance weighted	112	0.44628501105881	0.0810435446321632	3.65557895726928e-08	1.5624967319259	1.33301016067553	1.83149094380639
FHAD1	NPC	Inverse variance weighted	11	0.969962940771419	0.377326989546426	0.0101517710008469	2.63784670097889	1.25910612079575	5.52632943557421
FLNB	NPC	Inverse variance weighted	20	0.971082471552795	0.268607784122943	0.000300065765760474	2.64080150524573	1.55988361806168	4.47073904063038
G2E3	NPC	Inverse variance weighted	4	1.16425553448241	0.518775033856851	0.0248169819626718	3.20353707235136	1.15888283538661	8.85564050183369
GBP3	NPC	Inverse variance weighted	80	0.306588916405075	0.115658341780568	0.00802977098327679	1.35878228014169	1.08317719166525	1.70451270487758
GFI1	NPC	Inverse variance weighted	6	1.79270164615539	0.687794597259537	0.00914864058731838	6.00565572549264	1.55990392921211	23.1218730959668
GFPT1	NPC	Inverse variance weighted	47	0.349169289202951	0.139357010345288	0.0122252844792801	1.41788920335872	1.07899445681379	1.86322532085831
GLIPR1	NPC	Inverse variance weighted	26	-0.440556	0.150530183828063	0.00342583064916522	0.643678336459359	0.47922008689024	0.86457519657765
GLRX	NPC	Inverse variance weighted	27	0.518977628242878	0.178211208287068	0.00358951132631837	1.6803088709003	1.18492995128503	2.38278887166645
GLS	NPC	Inverse variance weighted	20	-0.905999	0.293335924437216	0.00201098817293637	0.404138064329233	0.227424462678211	0.718161859618752
GNE	NPC	Inverse variance weighted	16	1.17622411029027	0.407433392762188	0.00389043754489116	3.24210921501828	1.45885905418366	7.20513207356298
GPR137B	NPC	Inverse variance weighted	42	-0.309382	0.154402998227514	0.0450988073190275	0.733900231491844	0.54225871334699	0.993270438125958
GRAMD3	NPC	Inverse variance weighted	13	-1.3922	0.467971793389712	0.00293026485691757	0.24852856308166	0.0993186199806407	0.621901982523259
GS1-259H13.2	NPC	Inverse variance weighted	3	0.947348624228623	0.462598655326306	0.040571316224092	2.57886305184875	1.04149299913362	6.38557786343548
GTF2E2	NPC	Inverse variance weighted	23	0.522641468967386	0.240975976500258	0.0300938461500122	1.68647654676282	1.05161655352709	2.70460096243416
GTF2IRD2B	NPC	Inverse variance weighted	5	-0.822326	0.338833924374231	0.0152272170634291	0.439408389457337	0.226176294870809	0.853669182421515
HERC6	NPC	Inverse variance weighted	13	-0.675515	0.277699438587215	0.0149933760918026	0.508894415566654	0.295287559750262	0.877021458045683
HLA-C	NPC	Inverse variance weighted	60	-0.480134	0.108753621705995	1.01066653899148e-05	0.618700451992401	0.49992802324242	0.765690722462227
HLA-DQB1	NPC	Inverse variance weighted	47	-0.43669	0.133327104106061	0.00105540384490171	0.646171951747099	0.497574116548969	0.839147731639619
HLA-F	NPC	Inverse variance weighted	35	-0.239811	0.119456151614963	0.0446939176445709	0.78677649348747	0.622541412858901	0.994339071936954
HNMT	NPC	Inverse variance weighted	27	0.526357614750194	0.260218548649038	0.0430987128103511	1.69275539880888	1.01646331041161	2.81901059373827
HNRNPH3	NPC	Inverse variance weighted	5	1.96273227260905	0.723892884451571	0.00670083723539619	7.11875088554193	1.72271617900904	29.4166937002674
HPS1	NPC	Inverse variance weighted	28	0.506592456836451	0.167662385179096	0.00251522865308716	1.65962630048685	1.19479447349598	2.30529979705077
HRK	NPC	Inverse variance weighted	34	0.722283264785871	0.180346305387587	6.20228468765788e-05	2.05912938491313	1.44600489108827	2.93222647443583
HSD17B12	NPC	Inverse variance weighted	45	0.312137849848156	0.115863052932015	0.00705950729338952	1.3663430302273	1.08876743855786	1.71468507427403
HYAL3	NPC	Inverse variance weighted	41	-0.403976	0.10632263488935	0.000144972949872998	0.667660382960338	0.542065732156648	0.822354855750087
IBA57	NPC	Inverse variance weighted	9	-1.01977	0.329291162248154	0.00195584742600955	0.360678835425571	0.189156976115128	0.687731560292914
IFFO1	NPC	Inverse variance weighted	20	0.626145064750511	0.23012192196824	0.00650990381509619	1.87038644528808	1.19137261179245	2.93639909134224
IFIT1	NPC	Inverse variance weighted	8	1.91961815478419	0.576641487232823	0.000871699950127143	6.81835441613626	2.20207663425271	21.1118705956487
IL15RA	NPC	Inverse variance weighted	22	0.649152221093676	0.247491575420353	0.00871780676276606	1.91391756208781	1.17829530039827	3.10879660916072
IL6ST	NPC	Inverse variance weighted	4	1.99527201505102	0.86417815736207	0.0209509893289614	7.35420320980002	1.35186189890251	40.0072706353665
INPP5D	NPC	Inverse variance weighted	20	1.20529794322956	0.285351052788791	2.40097057826469e-05	3.33775339096044	1.90791281924683	5.83915448676832
KIAA1683	NPC	Inverse variance weighted	47	0.406104118860286	0.148315019412982	0.00617917805074361	1.50095882244448	1.12232977475669	2.00732212344836
KLHL7	NPC	Inverse variance weighted	14	1.05695909573235	0.377847059012983	0.00515284867721875	2.87760714317052	1.37215001000733	6.03477958680461
LATS2	NPC	Inverse variance weighted	9	-0.844309	0.386528699109028	0.0289374393779921	0.429854187872242	0.201512175313961	0.916940242163638
LGALS2	NPC	Inverse variance weighted	74	-0.151856	0.0673287037359373	0.0241051345300887	0.859111567370127	0.752901594565594	0.980304319338048
LIPA	NPC	Inverse variance weighted	91	-0.243443	0.0876977114992547	0.00550441285541953	0.783924415726942	0.660122281363709	0.930944927814417
LMBRD2	NPC	Inverse variance weighted	17	-1.33913	0.348772910787523	0.000123257516939146	0.262072846784136	0.132294116751295	0.519162746674968
LRPPRC	NPC	Inverse variance weighted	33	-0.831754	0.213357329247148	9.68260999286286e-05	0.435284911794679	0.286523460971039	0.661282513459701
LRRCC1	NPC	Inverse variance weighted	8	1.34462466191334	0.528800610808717	0.0109973826391846	3.83674619333307	1.36093976491418	10.8165120393731
LUZP1	NPC	Inverse variance weighted	15	-0.634475	0.317279843406767	0.0455289843115218	0.530213607307128	0.284693016578004	0.987472305266787
MCCC2	NPC	Inverse variance weighted	6	1.0754373798439	0.365821803704124	0.00328440268364346	2.93127470066751	1.43107605109841	6.00413329828165
MICA	NPC	Inverse variance weighted	40	0.310110293311531	0.0744138072136282	3.08126405957081e-05	1.36357549909611	1.17851978456335	1.57768937449287
MICB	NPC	Inverse variance weighted	26	0.37797138227636	0.188838193787523	0.0453318425869187	1.45932117982799	1.00787940284077	2.11296936904565
MIS18A	NPC	Inverse variance weighted	6	1.38259195985069	0.650632761510665	0.0335869538261118	3.98521777667033	1.11332579494466	14.2653307770334
MKNK2	NPC	Inverse variance weighted	14	1.10622884842466	0.278169384203794	6.98437536774671e-05	3.02293691859063	1.75245358645585	5.21448766712226
MLC1	NPC	Inverse variance weighted	15	1.65888541821687	0.376672799920484	1.06248992771304e-05	5.25345217797584	2.51081331458546	10.991960105499
MLXIP	NPC	Inverse variance weighted	6	0.831002915945819	0.369573357097474	0.0245413570475702	2.29561989993962	1.11253270906721	4.73682318016275
MMEL1	NPC	Inverse variance weighted	21	0.3250884321487	0.125159477633379	0.00939342041937485	1.38415304419653	1.08304428257511	1.76897628341033
MPV17L2	NPC	Inverse variance weighted	9	1.98580229387516	0.625863978497052	0.00150925763804793	7.28488966388647	2.13637164276283	24.8410044173628
MRPL39	NPC	Inverse variance weighted	14	0.934657418718781	0.412974210055415	0.0236212466670287	2.54634	1.13340680297826	5.72067537187226
MUS81	NPC	Inverse variance weighted	14	-1.3262	0.367222152837918	0.000304514342363533	0.265485044992213	0.129257054454809	0.545287910294747
MYO7B	NPC	Inverse variance weighted	17	0.710668630951528	0.333708961670003	0.033204149365296	2.03535170292431	1.05823144444677	3.91469803353143
NAB1	NPC	Inverse variance weighted	7	1.1814187504469	0.580890071814532	0.0419709792825501	3.25899462458205	1.04380658583851	10.1753007761707
NABP1	NPC	Inverse variance weighted	6	2.07127748930831	0.714149582071891	0.00372756604442302	7.93495346397952	1.9572575973576	32.1692385103138
NAE1	NPC	Inverse variance weighted	5	1.57701788408294	0.639624712600538	0.0136808349953453	4.84049933639146	1.38175364182061	16.9570270100638
NAGK	NPC	Inverse variance weighted	44	0.271216414712435	0.110520015209683	0.0141275924311454	1.31155888031108	1.05611510986931	1.62878712788772
NAIP	NPC	Inverse variance weighted	7	0.883489784457026	0.315380015986263	0.00508893045622249	2.41932792451872	1.30388067592359	4.48902090078914
NOL6	NPC	Inverse variance weighted	22	0.621471690985704	0.238685650049004	0.00922168323956935	1.86166582357881	1.1660801407229	2.97217962783652
NRG1	NPC	Inverse variance weighted	73	0.25700383432243	0.101635113133563	0.0114488650058586	1.29305008472079	1.05950202773071	1.57807958629165
NSG1	NPC	Inverse variance weighted	69	0.175943075699957	0.0844424705155676	0.0371979209865638	1.19237018188077	1.01049047671687	1.40698668953091
NYNRIN	NPC	Inverse variance weighted	11	-0.747328	0.350974876422456	0.0332300642412806	0.473630315013535	0.238058474215247	0.942313337255914
OAS2	NPC	Inverse variance weighted	5	-1.9805	0.676797444655723	0.00343044199071013	0.13800056508757	0.0366251362864142	0.519975019766767
OASL	NPC	Inverse variance weighted	43	0.340627704119329	0.163119416394868	0.036778836170187	1.40582975879498	1.02113387086335	1.93545368252508
OPTN	NPC	Inverse variance weighted	24	0.488596389957751	0.219069979679429	0.0257261358242644	1.63002669169524	1.06100781976245	2.50421058747127
OSTM1	NPC	Inverse variance weighted	12	-0.59483	0.261587449381359	0.0229706655708012	0.551656612851809	0.330370375055679	0.921163159535237
P2RX4	NPC	Inverse variance weighted	55	0.459320210754649	0.136626775327309	0.000774191191464035	1.58299751446364	1.21110326218491	2.06908957232705
PANX2	NPC	Inverse variance weighted	27	-0.941764	0.260787029214077	0.000304738967502429	0.38993937443968	0.23388948082629	0.650104977792219
PDE4DIP	NPC	Inverse variance weighted	3	1.4648552471708	0.723722761337168	0.0429644115028652	4.32691686150941	1.04744999578081	17.8740843017125
PDP1	NPC	Inverse variance weighted	7	1.28330047051719	0.523044146113799	0.0141464772200847	3.60852993980179	1.29451219932799	10.0589923626874
PECR	NPC	Inverse variance weighted	7	-1.19459	0.572693217827368	0.0369860649560894	0.302827783460087	0.0985619777030596	0.930426403492333
PFKM	NPC	Inverse variance weighted	20	-0.788869	0.32880650050955	0.0164314840032233	0.454358587735108	0.238513517556669	0.865534701611172
PHACTR2	NPC	Inverse variance weighted	10	1.27510251669417	0.531186455068443	0.0163735808446095	3.5790683055457	1.26361551055046	10.1373636432981
PHLPP1	NPC	Inverse variance weighted	22	0.576833261318812	0.25019380205687	0.0211360266211815	1.78039145972521	1.09030056865391	2.90726597875292
PIEZO1	NPC	Inverse variance weighted	40	0.332183156665011	0.150623155201331	0.0274265732576547	1.3940081470152	1.03765335315569	1.87274363643209
POR	NPC	Inverse variance weighted	56	0.628583767871117	0.144355402559834	1.33420890910013e-05	1.87495332892225	1.41290402544857	2.48810246295431
PQLC3	NPC	Inverse variance weighted	23	0.542275590435983	0.196363837333368	0.00575213955647837	1.71991623736992	1.1704665959444	2.5272928538229
PRC1	NPC	Inverse variance weighted	8	1.04398862083733	0.417520428476277	0.0124035921102254	2.84052422338248	1.25313521239762	6.43871290487885
PRMT3	NPC	Inverse variance weighted	4	-2.33722	0.919207560503097	0.0110016751725545	0.0965958919285282	0.0159409201111903	0.585334238700426
PRSS22	NPC	Inverse variance weighted	12	0.784459816339121	0.3854745870919	0.0418459054289925	2.19122295813865	1.02935215192617	4.66454365815351
PTTG1IP	NPC	Inverse variance weighted	36	-0.329691	0.137370178415176	0.0163940828018785	0.719145583138305	0.549395326765939	0.941344683056732
PVT1	NPC	Inverse variance weighted	20	-0.601556	0.24061826735239	0.0124178058391053	0.547958275343406	0.341923606790663	0.878144315145658
PYGB	NPC	Inverse variance weighted	67	0.189079800693478	0.0820475811331183	0.0211938064871696	1.20813735883526	1.02866983126137	1.41891580121841
RAB27B	NPC	Inverse variance weighted	8	2.15768283350407	0.566548541515811	0.000139829596628861	8.65106844962859	2.84979679612422	26.2618673099585
RAPGEF1	NPC	Inverse variance weighted	52	-0.31169	0.121694779437566	0.0104297463586936	0.732208278563355	0.576827487123031	0.92944420154229
RBM26-AS1	NPC	Inverse variance weighted	17	0.232143464677642	0.0931930622745006	0.0127385864307765	1.26130066794257	1.05072989694546	1.51407072319648
RCSD1	NPC	Inverse variance weighted	33	0.596886666572232	0.173219937474042	0.000569305835361741	1.81645475862023	1.29353087165919	2.55077629951101
RHPN2	NPC	Inverse variance weighted	10	0.928851754034843	0.455389902895833	0.0413817536521382	2.53160060787731	1.03695397389219	6.18060376754107
RNF144B	NPC	Inverse variance weighted	53	0.368202046050283	0.156060566625637	0.0183068069757203	1.44513399309423	1.06430641710889	1.96222838124899
RTN4IP1	NPC	Inverse variance weighted	17	0.575509124283419	0.237387444773668	0.0153360178745936	1.77804	1.11653454530005	2.83144877712221
SCARB1	NPC	Inverse variance weighted	34	0.525827365934205	0.243235931636803	0.0306336180300514	1.69185805519162	1.05030956016765	2.72527623042859
SCFD2	NPC	Inverse variance weighted	5	1.57894924993475	0.797829411359354	0.0478096781525821	4.8498571452829	1.01531976640347	23.1662133526362
SCG5	NPC	Inverse variance weighted	3	2.85668785374223	0.776070589052991	0.000232353866932179	17.4037874790312	3.80223670138022	79.6614841220514
SFXN1	NPC	Inverse variance weighted	12	-0.800587	0.331771264634633	0.0158188084780914	0.44906525095996	0.234368936059594	0.860436553624387
SGOL2	NPC	Inverse variance weighted	3	-3.74236	1.07230044391842	0.000482959304873458	0.023697993792035	0.00289701681877245	0.193852830307451
SIN3B	NPC	Inverse variance weighted	21	-0.594576	0.242502030143178	0.0142128728821142	0.55179667994757	0.343049813648372	0.887566656174471
SIPA1L2	NPC	Inverse variance weighted	38	-0.367673	0.173231687251097	0.0338012806253093	0.692343622252325	0.4930192842024	0.972253432335694
SKIL	NPC	Inverse variance weighted	3	-2.8219	1.02726862042241	0.00601437348512152	0.0594925885065566	0.00794390720752925	0.445544993760231
SKP2	NPC	Inverse variance weighted	20	-0.669893	0.333557222377736	0.0446083838539798	0.511763583305905	0.266158131423168	0.984008881478427
SLC1A4	NPC	Inverse variance weighted	22	-0.681121	0.267631946354935	0.0109280614760363	0.506049472104276	0.299488440437783	0.855078305669086
SLC35B3	NPC	Inverse variance weighted	21	-0.651025	0.263379733158956	0.0134430370151315	0.521510923247335	0.311221831679115	0.873889989011778
SMURF2	NPC	Inverse variance weighted	3	1.54891689903871	0.657276871109815	0.0184447464077679	4.70636994724039	1.29777885700972	17.0675596698533
SNRNP70	NPC	Inverse variance weighted	6	1.70714303772145	0.545164216380141	0.00173957842120434	5.51318798610694	1.89386776336313	16.0492946541199
SNX29	NPC	Inverse variance weighted	49	0.478372737565151	0.107523771325331	8.62729624931821e-06	1.61344676353495	1.3068584741039	1.99196049943083
SORBS1	NPC	Inverse variance weighted	3	2.87124878330364	1.22383635031749	0.0189707539018368	17.6590567715275	1.60404656036395	194.409747052028
SPTLC2	NPC	Inverse variance weighted	44	0.476559153643627	0.167415632612579	0.00441939767476947	1.61052329420615	1.16000522999324	2.23601171280559
SRD5A3	NPC	Inverse variance weighted	47	-0.295715	0.140677728020561	0.0355469120965821	0.74399958286318	0.564709888303238	0.98021194734835
SRR	NPC	Inverse variance weighted	49	-0.257768	0.126709113623156	0.0419184869228991	0.772774526457794	0.602831340533275	0.990626114783268
SSH1	NPC	Inverse variance weighted	14	-0.800066	0.319968349046057	0.0124033941706818	0.449299124871946	0.239978876332001	0.841197803307563
STAMBP	NPC	Inverse variance weighted	12	1.04638338502171	0.340132603750043	0.00209517719191651	2.84733476061801	1.46188029684367	5.54581333131587
STEAP3	NPC	Inverse variance weighted	53	-0.437678	0.13925674002716	0.00167248632644773	0.645533366931684	0.491338691854865	0.848118283233529
STMN3	NPC	Inverse variance weighted	30	0.356297509969651	0.13550757629616	0.00855470299812634	1.4280323389288	1.09494338685452	1.86244913253893
TBC1D8	NPC	Inverse variance weighted	28	-0.437473	0.217531972134331	0.0443178051359543	0.64566624635667	0.421542270536865	0.988951597080357
TLE1	NPC	Inverse variance weighted	8	1.63228974658184	0.707851752672481	0.0211119265699994	5.11557468809846	1.2774939552012	20.4847187597003
TMEM110	NPC	Inverse variance weighted	18	-1.03299	0.350375683362778	0.00319591325583848	0.355940831973422	0.179115021076919	0.707332501228495
TMEM245	NPC	Inverse variance weighted	46	0.336874854729579	0.151629501990536	0.0263037693462351	1.40056377883788	1.04047884058278	1.88526553552397
TMEM88	NPC	Inverse variance weighted	9	1.09742306286625	0.454313867286803	0.0157109713310943	2.99643444314075	1.22994306904532	7.30002843059186
TMEM97	NPC	Inverse variance weighted	58	-0.242225	0.12343788822386	0.0497249393777438	0.784879594388945	0.616212617435872	0.999713346103733
TMOD2	NPC	Inverse variance weighted	52	-0.41574	0.121031001664386	0.00059257395183226	0.659851560956539	0.520502212528472	0.836507649759441
TPM1	NPC	Inverse variance weighted	37	-0.564667	0.225763017222379	0.0123790592905421	0.568549293195372	0.365253817800222	0.88499635880537
TPM2	NPC	Inverse variance weighted	87	0.320789621358778	0.0957796531038075	0.000810318109815145	1.37821560326635	1.14232025032279	1.66282463131515
TPP1	NPC	Inverse variance weighted	29	0.446515005122708	0.215654718738459	0.038404717527922	1.56285613822818	1.02411800209123	2.38499792388174
TRAPPC6A	NPC	Inverse variance weighted	16	-0.80067	0.320052280446884	0.012360421863586	0.449028172999591	0.239794705179982	0.840828824790005
TRIM59	NPC	Inverse variance weighted	11	-1.08356	0.518515420812315	0.0366423206399461	0.338390159980666	0.122475293563276	0.934946935339098
TRIOBP	NPC	Inverse variance weighted	34	0.368061324486076	0.126515791479461	0.00362340458310166	1.44493064588624	1.12759875166688	1.85156694110816
TSPAN10	NPC	Inverse variance weighted	6	-1.22697	0.523774695754613	0.019152757091877	0.293180898721304	0.105024264780071	0.818430288991098
ULK1	NPC	Inverse variance weighted	4	-1.48681	0.606926741721466	0.0142963904658724	0.226093684486463	0.0688116479858371	0.742873563719701
UPP1	NPC	Inverse variance weighted	30	-0.462025	0.209319436563643	0.0272950087956535	0.630006531854353	0.417992751593866	0.949557686504567
UQCR10	NPC	Inverse variance weighted	8	-1.88155	0.647271268883585	0.00365027538569619	0.152353142819051	0.0428433074428346	0.541776102552607
UROS	NPC	Inverse variance weighted	43	0.278180631307882	0.13037815813091	0.0328718978462889	1.32072473990143	1.02289765847255	1.70526721235476
USP36	NPC	Inverse variance weighted	50	0.27149747971591	0.117768993618034	0.0211475827075923	1.31192756542215	1.04150861376728	1.6525585234373
UVRAG	NPC	Inverse variance weighted	14	-0.811536	0.361911391227759	0.0249380794491881	0.444175366271249	0.218519034842544	0.902858445006214
XBP1	NPC	Inverse variance weighted	35	0.562139312687073	0.148855426118967	0.000159104185047048	1.75442174516053	1.31046584057553	2.34877977326011
ZNF19	NPC	Inverse variance weighted	4	3.10075082081131	1.25127541074733	0.0132094408942362	22.214624223645	1.91219350632771	258.075099494234
ZNF285	NPC	Inverse variance weighted	3	-2.82227	1.3135555313436	0.0316680122959847	0.0594705460143824	0.00453086252202812	0.780589970685238
ZNF713	NPC	Inverse variance weighted	16	0.795047647981157	0.31925681957004	0.0127632619881861	2.21454651296076	1.18448049974552	4.14039425648655
ZNF777	NPC	Inverse variance weighted	3	-2.13794	0.962315716144696	0.0263064295874727	0.117897889533476	0.0178799523233067	0.777402092864035

## Sheet: Table S4
Table S4. Results of heterogeneity test
Gene	method	Q	Q_df	Q_pval
ABCA1	MR Egger	16.4148080664288	18	0.563622125239679
ABCB4	MR Egger	8.67747360149912	9	0.467562875998229
ABCC3	MR Egger	58.7559521053218	62	0.593433983674496
ABHD14A	MR Egger	0.139042859177185	2	0.932840142789879
ACAT1	MR Egger	13.4444427981408	18	0.764523000641212
AKR1C3	MR Egger	21.4805233775185	18	0.255866448769621
ANKRD10-IT1	MR Egger	0.807416165198773	3	0.847692374534738
ANKRD10	MR Egger	25.4944231791895	32	0.785522416090971
ANKRD16	MR Egger	1.33557667317785	1	0.247815539714513
ANKRD37	MR Egger	0.821163592244139	1	0.364840178355684
ANO10	MR Egger	9.61761822219489	11	0.565074700544723
APH1B	MR Egger	29.6243746519229	32	0.587320744554444
ARHGAP11A	MR Egger	13.0396145326366	7	0.0711490527390073
ARHGAP26	MR Egger	7.87484368438823	6	0.247416762174756
ARPC1B	MR Egger	9.82120303044162	9	0.365152947282772
ARSA	MR Egger	36.7006836662407	38	0.529490801094376
ATF3	MR Egger	1.70161222909696	3	0.636575419697413
ATHL1	MR Egger	31.8240658586971	30	0.375754311307876
AUTS2	MR Egger	51.6930748058508	37	0.0549673587445357
BBS9	MR Egger	4.44997515212668	7	0.726732437689277
BCCIP	MR Egger	10.0859124444506	7	0.183756944045281
C12orf73	MR Egger	1.87474733149468	2	0.391655103006194
C17orf51	MR Egger	11.9725	12	0.447891116406063
CBX6	MR Egger	33.1149072297714	28	0.23153898957156
CCDC88A	MR Egger	5.53874904579561	10	0.852414083642916
CD14	MR Egger	48.6669139195266	24	0.00208523242215372
CD9	MR Egger	28.7676292570416	37	0.831413590784066
CHPF2	MR Egger	8.0484171929531	11	0.70896022543275
CITED4	MR Egger	26.7941635313075	38	0.91318306298887
CLCN7	MR Egger	18.7552456049166	27	0.878747251608445
CLHC1	MR Egger	39.1885919400762	57	0.965498412896921
CLIC4	MR Egger	6.29484578794062	17	0.990975362414538
CLMN	MR Egger	17.2515440233245	23	0.79672793643769
CLTCL1	MR Egger	11.7617189632017	22	0.962106520407738
COX11	MR Egger	27.8687205775982	22	0.180072825289508
CRABP2	MR Egger	3.75265609600206	6	0.710106790607239
CREBRF	MR Egger	14.3028457459636	18	0.709146443403226
CSTA	MR Egger	51.4341194075903	48	0.340836846802652
DCAF4	MR Egger	54.2741154720612	67	0.868484661284487
DDR1	MR Egger	24.8115093761962	25	0.472976224118108
DDX60L	MR Egger	46.9832803242832	51	0.633881061298933
DGAT2	MR Egger	4.90588505007032	5	0.42747385831311
DNASE2	MR Egger	47.7568792107292	44	0.322659374114932
DNM1L	MR Egger	8.91914828415722	9	0.444770804586839
DNTT	MR Egger	3.56226619170878	3	0.312775743883718
EEF1A1	MR Egger	35.8177532354649	40	0.658975069777363
EGLN3	MR Egger	3.39813340950236	10	0.970444490136889
EID2B	MR Egger	3.46733088298126	4	0.4828631106584
EIF4E	MR Egger	7.74376134349101	14	0.902243646761352
EXOC7	MR Egger	0.908127886332774	1	0.34061163397293
FAM213A	MR Egger	42.2027906929709	32	0.107127001798704
FAM49A	MR Egger	6.19260662655265	9	0.720497363123424
FDFT1	MR Egger	123.752803138564	110	0.174718370999857
FHAD1	MR Egger	3.05217788242549	9	0.962190280095817
FLNB	MR Egger	18.6207440269406	18	0.415518460638856
G2E3	MR Egger	1.68129959369748	2	0.4314300904135
GBP3	MR Egger	78.8263818087689	78	0.452521601840473
GFI1	MR Egger	4.43578685488446	4	0.350229544843953
GFPT1	MR Egger	43.0568029155448	45	0.554585148857582
GLIPR1	MR Egger	19.5567338605666	24	0.721684042808603
GLRX	MR Egger	36.0529687014432	25	0.0707999878647003
GLS	MR Egger	7.56933049814387	18	0.984382298985478
GNE	MR Egger	15.6969249426508	14	0.332230966537309
GPR137B	MR Egger	42.8458825568542	40	0.350072378072666
GRAMD3	MR Egger	1.93975705202661	11	0.998696671319229
GS1-259H13.2	MR Egger	0.448617050157263	1	0.502992427833111
GTF2E2	MR Egger	13.9500753950554	21	0.871734157304904
GTF2IRD2B	MR Egger	4.41967735313822	3	0.219567760621499
HERC6	MR Egger	8.99034598545523	11	0.622783483677788
HLA-C	MR Egger	89.1324557892283	58	0.00535921278468288
HLA-DQB1	MR Egger	61.7123386365638	45	0.0495069148518562
HLA-F	MR Egger	23.9218896038226	33	0.876182331825643
HNMT	MR Egger	20.0159739267048	25	0.745986864503025
HNRNPH3	MR Egger	0.75788568543135	3	0.859511375654278
HPS1	MR Egger	26.2577146817234	26	0.449010922760206
HRK	MR Egger	31.577800899489	32	0.487819184003529
HSD17B12	MR Egger	30.7557323689599	43	0.918930817704577
HYAL3	MR Egger	27.6480675405948	39	0.912955247298829
IBA57	MR Egger	2.60749781116659	7	0.918787233916186
IFFO1	MR Egger	11.2485595856481	18	0.883512665149868
IFIT1	MR Egger	4.56874858329171	6	0.600186685316394
IL15RA	MR Egger	16.0627687228798	20	0.712722625577386
IL6ST	MR Egger	2.14261516004352	2	0.342560299438337
INPP5D	MR Egger	14.0894151243235	18	0.723244074549465
KIAA1683	MR Egger	53.5966666083567	45	0.177888440181616
KLHL7	MR Egger	7.7354040005807	12	0.80545080898094
LATS2	MR Egger	8.91120715441298	7	0.259094059314931
LGALS2	MR Egger	56.0060871983855	72	0.917734034425973
LIPA	MR Egger	86.7171427854494	89	0.548744407141721
LMBRD2	MR Egger	22.4370434425907	15	0.0968459943444908
LRPPRC	MR Egger	28.2704849085967	31	0.607170291329987
LRRCC1	MR Egger	3.85684943340334	6	0.696041319885594
LUZP1	MR Egger	12.2239625980998	13	0.50937004222066
MCCC2	MR Egger	2.42987956988958	4	0.657234389464972
MICA	MR Egger	35.0849213234274	38	0.604985508763769
MICB	MR Egger	41.0838867841369	24	0.0163073823823176
MIS18A	MR Egger	6.5348672584614	4	0.162606679028399
MKNK2	MR Egger	7.95013936284365	12	0.789014589378018
MLC1	MR Egger	13.3753431968016	13	0.419254896247666
MLXIP	MR Egger	1.72083126131973	4	0.786930211943199
MMEL1	MR Egger	12.1874879416382	19	0.877455596646403
MPV17L2	MR Egger	10.6414512908029	7	0.155041389125093
MRPL39	MR Egger	8.98157637770378	12	0.704503249068633
MUS81	MR Egger	9.03830741220113	12	0.699655032635695
MYO7B	MR Egger	12.4203618130942	15	0.64697256700613
NAB1	MR Egger	3.45906062351619	5	0.629591130094867
NABP1	MR Egger	1.41629041747457	4	0.841358778860102
NAE1	MR Egger	1.22208777440592	3	0.747711771240078
NAGK	MR Egger	50.4325638945438	42	0.174505586021545
NAIP	MR Egger	3.18473411634619	5	0.671529645808951
NOL6	MR Egger	15.9068398319853	20	0.722386685464749
NRG1	MR Egger	82.9700612869885	71	0.156663305247503
NSG1	MR Egger	77.4808446160717	67	0.179047091792854
NYNRIN	MR Egger	6.04574208809774	9	0.735331637935022
OAS2	MR Egger	1.98037630625136	3	0.576489649914228
OASL	MR Egger	39.3215960293207	41	0.545373821275007
OPTN	MR Egger	25.8968982292502	22	0.25613502782968
OSTM1	MR Egger	5.48166939937201	10	0.856771819719852
P2RX4	MR Egger	62.5845104999619	53	0.172593231212373
PANX2	MR Egger	37.2256903122175	25	0.05495063427798
PDE4DIP	MR Egger	0.0697381143926522	1	0.791718467288729
PDP1	MR Egger	2.77969965977119	5	0.733904326042669
PECR	MR Egger	2.10826460949908	5	0.833970877422472
PFKM	MR Egger	15.170137232697	18	0.650253577185342
PHACTR2	MR Egger	5.46958556173306	8	0.70640728033636
PHLPP1	MR Egger	16.2828041008848	20	0.698931812056037
PIEZO1	MR Egger	28.201124887821	38	0.876987473555758
POR	MR Egger	56.5381752736793	54	0.380384708507837
PQLC3	MR Egger	16.8288281542092	21	0.721428765116684
PRC1	MR Egger	6.87897201708088	6	0.332185058123601
PRMT3	MR Egger	0.831092937588184	2	0.659979523928234
PRSS22	MR Egger	6.41809907026851	10	0.778999038263561
PTTG1IP	MR Egger	25.8873319816704	34	0.83951637735262
PVT1	MR Egger	11.1835029570139	18	0.886407895540528
PYGB	MR Egger	62.2424580834031	65	0.57402767315502
RAB27B	MR Egger	1.95359283237934	6	0.923916765780812
RAPGEF1	MR Egger	38.5358097360401	50	0.880985123402461
RBM26-AS1	MR Egger	14.6228424381845	15	0.478909943608709
RCSD1	MR Egger	22.1414245753519	31	0.878520221632497
RHPN2	MR Egger	3.0109006522317	8	0.933671608213807
RNF144B	MR Egger	58.2583149735087	51	0.225878967696829
RTN4IP1	MR Egger	14.4360472565552	15	0.492748155326357
SCARB1	MR Egger	61.8311438680406	32	0.00119469259869054
SCFD2	MR Egger	3.75263517755562	3	0.289443731605433
SCG5	MR Egger	0.417633565613029	1	0.518120217033909
SFXN1	MR Egger	7.59739582203288	10	0.668096664236289
SGOL2	MR Egger	0.422613430610178	1	0.515635865527886
SIN3B	MR Egger	20.7321379041015	19	0.351788609759157
SIPA1L2	MR Egger	30.2152151321361	36	0.739676178243289
SKIL	MR Egger	0.97547008436831	1	0.323319734107241
SKP2	MR Egger	17.9228148115981	18	0.460748188502339
SLC1A4	MR Egger	15.3024678945384	20	0.758846606170606
SLC35B3	MR Egger	16.5398948868571	19	0.621007574053177
SMURF2	MR Egger	0.410086852558482	1	0.521925425723741
SNRNP70	MR Egger	1.70226412046184	4	0.790306302612505
SNX29	MR Egger	34.5066542960491	47	0.912147087022393
SORBS1	MR Egger	0.767701476479686	1	0.380929059533939
SPTLC2	MR Egger	43.9875190836888	42	0.387413626264881
SRD5A3	MR Egger	36.0739901546219	45	0.826361182116386
SRR	MR Egger	34.304409006741	47	0.916178678032194
SSH1	MR Egger	12.1663783790404	12	0.432411841287897
STAMBP	MR Egger	6.94532099279915	10	0.730596709866926
STEAP3	MR Egger	58.8443026440236	51	0.210301104429894
STMN3	MR Egger	20.9678072099707	28	0.826688668507284
TBC1D8	MR Egger	18.4888411841159	26	0.857271036373794
TLE1	MR Egger	3.96293705671561	6	0.681692195899549
TMEM110	MR Egger	21.2356145886356	16	0.169630582534303
TMEM245	MR Egger	62.1971474057631	44	0.0365884307610439
TMEM88	MR Egger	5.75075553666934	7	0.569135085349674
TMEM97	MR Egger	30.999289267008	56	0.99730907739762
TMOD2	MR Egger	41.862400896959	50	0.786681990471408
TPM1	MR Egger	49.7377722528326	35	0.0506289144169949
TPM2	MR Egger	104.315627340096	85	0.0760218906073101
TPP1	MR Egger	26.0274829642492	27	0.517075532993461
TRAPPC6A	MR Egger	11.0884731098039	14	0.679072107492936
TRIM59	MR Egger	6.41537819733875	9	0.697732528097493
TRIOBP	MR Egger	19.9435804766813	32	0.952232091140453
TSPAN10	MR Egger	0.130607083233075	4	0.997958319608651
ULK1	MR Egger	0.114363289015111	2	0.944422504624322
UPP1	MR Egger	26.3281795744418	28	0.555010747082301
UQCR10	MR Egger	8.25578674464834	6	0.219956302577435
UROS	MR Egger	46.0642805832292	41	0.270686585534642
USP36	MR Egger	40.9022226551015	48	0.75633873254147
UVRAG	MR Egger	8.48134361536902	12	0.746475260986105
XBP1	MR Egger	30.8738057900247	33	0.573359860940703
ZNF19	MR Egger	0.90099273478067	2	0.637311732336753
ZNF285	MR Egger	2.50275289259591	1	0.113647485871375
ZNF713	MR Egger	17.5408386143315	14	0.228499822209496
ZNF777	MR Egger	0.415986409685094	1	0.518946572425829

## Sheet: Table S5
Table S5. Results of heterogeneity test
exposure	method	Q	Q_df	Q_pval			exposure	method	Q	Q_df	Q_pval
ABCA1	Inverse variance weighted	16.9473141742677	19	0.593437283180358			ABCA1	MR Egger	16.4148080664288	18	0.563622125239679
ABCB4	Inverse variance weighted	8.83197332635259	10	0.548120842333319			ABCB4	MR Egger	8.67747360149912	9	0.467562875998229
ABCC3	Inverse variance weighted	60.1747225841981	63	0.577655554229134			ABCC3	MR Egger	58.7559521053218	62	0.593433983674496
ABHD14A	Inverse variance weighted	0.695335613394063	3	0.874300507857062			ABHD14A	MR Egger	0.139042859177185	2	0.932840142789879
ACAT1	Inverse variance weighted	14.3500567197585	19	0.762915699093614			ACAT1	MR Egger	13.4444427981408	18	0.764523000641212
AKR1C3	Inverse variance weighted	21.5509205411066	19	0.307172584084115			AKR1C3	MR Egger	21.4805233775185	18	0.255866448769621
ANKRD10-IT1	Inverse variance weighted	2.75930491409176	4	0.598877621462558			ANKRD10-IT1	MR Egger	0.807416165198773	3	0.847692374534738
ANKRD10	Inverse variance weighted	25.953010775718	33	0.803584125115661			ANKRD10	MR Egger	25.4944231791895	32	0.785522416090971
ANKRD16	Inverse variance weighted	2.24817029776272	2	0.32494961193208			ANKRD16	MR Egger	1.33557667317785	1	0.247815539714513
ANKRD37	Inverse variance weighted	1.48330846790045	2	0.476325309932757			ANKRD37	MR Egger	0.821163592244139	1	0.364840178355684
ANO10	Inverse variance weighted	9.72792201197559	12	0.639816138730245			ANO10	MR Egger	9.61761822219489	11	0.565074700544723
APH1B	Inverse variance weighted	31.6778679064653	33	0.532881848053441			APH1B	MR Egger	29.6243746519229	32	0.587320744554444
ARHGAP11A	Inverse variance weighted	13.4611234160127	8	0.0969380862312196			ARHGAP11A	MR Egger	13.0396145326366	7	0.0711490527390073
ARHGAP26	Inverse variance weighted	9.75463014765647	7	0.202909997377581			ARHGAP26	MR Egger	7.87484368438823	6	0.247416762174756
ARPC1B	Inverse variance weighted	10.028281578237	10	0.438015556550017			ARPC1B	MR Egger	9.82120303044162	9	0.365152947282772
ARSA	Inverse variance weighted	36.8586809551821	39	0.567933898761128			ARSA	MR Egger	36.7006836662407	38	0.529490801094376
ATF3	Inverse variance weighted	2.24213167797737	4	0.691323693764745			ATF3	MR Egger	1.70161222909696	3	0.636575419697413
ATHL1	Inverse variance weighted	36.1462807406582	31	0.24064117439413			ATHL1	MR Egger	31.8240658586971	30	0.375754311307876
AUTS2	Inverse variance weighted	51.7441190097807	38	0.0676988103118601			AUTS2	MR Egger	51.6930748058508	37	0.0549673587445357
BBS9	Inverse variance weighted	7.93410019505124	8	0.439933803774099			BBS9	MR Egger	4.44997515212668	7	0.726732437689277
BCCIP	Inverse variance weighted	11.2276456006106	8	0.189131107343794			BCCIP	MR Egger	10.0859124444506	7	0.183756944045281
C12orf73	Inverse variance weighted	4.33122478525285	3	0.227847795491287			C12orf73	MR Egger	1.87474733149468	2	0.391655103006194
C17orf51	Inverse variance weighted	12.0045291252574	13	0.527272500915359			C17orf51	MR Egger	11.9725	12	0.447891116406063
CBX6	Inverse variance weighted	33.1221938021922	29	0.272837813359828			CBX6	MR Egger	33.1149072297714	28	0.23153898957156
CCDC88A	Inverse variance weighted	5.59293357295018	11	0.899098967533779			CCDC88A	MR Egger	5.53874904579561	10	0.852414083642916
CD14	Inverse variance weighted	48.9514494196541	25	0.00286366110793824			CD14	MR Egger	48.6669139195266	24	0.00208523242215372
CD9	Inverse variance weighted	28.7696231954013	38	0.860142724187095			CD9	MR Egger	28.7676292570416	37	0.831413590784066
CHPF2	Inverse variance weighted	8.5264178157217	12	0.742759428588329			CHPF2	MR Egger	8.0484171929531	11	0.70896022543275
CITED4	Inverse variance weighted	28.4664340603642	39	0.893171664267166			CITED4	MR Egger	26.7941635313075	38	0.91318306298887
CLCN7	Inverse variance weighted	19.1073677649956	28	0.894790556697769			CLCN7	MR Egger	18.7552456049166	27	0.878747251608445
CLHC1	Inverse variance weighted	39.1977576606348	58	0.972379527142354			CLHC1	MR Egger	39.1885919400762	57	0.965498412896921
CLIC4	Inverse variance weighted	6.49852476524084	18	0.993717718127415			CLIC4	MR Egger	6.29484578794062	17	0.990975362414538
CLMN	Inverse variance weighted	17.3069484788747	24	0.835278735114153			CLMN	MR Egger	17.2515440233245	23	0.79672793643769
CLTCL1	Inverse variance weighted	11.8623281411943	23	0.972540098893309			CLTCL1	MR Egger	11.7617189632017	22	0.962106520407738
COX11	Inverse variance weighted	29.2452402021511	23	0.172316075166447			COX11	MR Egger	27.8687205775982	22	0.180072825289508
CRABP2	Inverse variance weighted	5.63677354421301	7	0.582741737789672			CRABP2	MR Egger	3.75265609600206	6	0.710106790607239
CREBRF	Inverse variance weighted	14.7142027244836	19	0.740580737793408			CREBRF	MR Egger	14.3028457459636	18	0.709146443403226
CSTA	Inverse variance weighted	51.4563442453134	49	0.377812195005909			CSTA	MR Egger	51.4341194075903	48	0.340836846802652
DCAF4	Inverse variance weighted	55.3767556740316	68	0.864250131139707			DCAF4	MR Egger	54.2741154720612	67	0.868484661284487
DDR1	Inverse variance weighted	24.9573280228451	26	0.521391779756981			DDR1	MR Egger	24.8115093761962	25	0.472976224118108
DDX60L	Inverse variance weighted	47.1782815016102	52	0.663603540537094			DDX60L	MR Egger	46.9832803242832	51	0.633881061298933
DGAT2	Inverse variance weighted	5.08993969269507	6	0.53233059217652			DGAT2	MR Egger	4.90588505007032	5	0.42747385831311
DNASE2	Inverse variance weighted	47.7823351035789	45	0.360380755778617			DNASE2	MR Egger	47.7568792107292	44	0.322659374114932
DNM1L	Inverse variance weighted	12.249149916208	10	0.268727877950605			DNM1L	MR Egger	8.91914828415722	9	0.444770804586839
DNTT	Inverse variance weighted	3.76641217080623	4	0.438540467014807			DNTT	MR Egger	3.56226619170878	3	0.312775743883718
EEF1A1	Inverse variance weighted	35.8180046856305	41	0.699793507524594			EEF1A1	MR Egger	35.8177532354649	40	0.658975069777363
EGLN3	Inverse variance weighted	4.41065629744624	11	0.956330887672017			EGLN3	MR Egger	3.39813340950236	10	0.970444490136889
EID2B	Inverse variance weighted	4.82628644207316	5	0.437446352186477			EID2B	MR Egger	3.46733088298126	4	0.4828631106584
EIF4E	Inverse variance weighted	9.99427840076189	15	0.820099669451866			EIF4E	MR Egger	7.74376134349101	14	0.902243646761352
EXOC7	Inverse variance weighted	1.50162066926117	2	0.471983932811026			EXOC7	MR Egger	0.908127886332774	1	0.34061163397293
FAM213A	Inverse variance weighted	42.5292170492487	33	0.123776376242638			FAM213A	MR Egger	42.2027906929709	32	0.107127001798704
FAM49A	Inverse variance weighted	8.08728038014694	10	0.620311763082344			FAM49A	MR Egger	6.19260662655265	9	0.720497363123424
FDFT1	Inverse variance weighted	129.970641161213	111	0.105408802533822			FDFT1	MR Egger	123.752803138564	110	0.174718370999857
FHAD1	Inverse variance weighted	3.17989710484244	10	0.976867699369103			FHAD1	MR Egger	3.05217788242549	9	0.962190280095817
FLNB	Inverse variance weighted	24.4946991273125	19	0.177855381614479			FLNB	MR Egger	18.6207440269406	18	0.415518460638856
G2E3	Inverse variance weighted	2.97905348922919	3	0.394866003859781			G2E3	MR Egger	1.68129959369748	2	0.4314300904135
GBP3	Inverse variance weighted	81.351568338002	79	0.405864871257811			GBP3	MR Egger	78.8263818087689	78	0.452521601840473
GFI1	Inverse variance weighted	5.16569472009205	5	0.395995268859688			GFI1	MR Egger	4.43578685488446	4	0.350229544843953
GFPT1	Inverse variance weighted	44.3190039222684	46	0.542862690670368			GFPT1	MR Egger	43.0568029155448	45	0.554585148857582
GLIPR1	Inverse variance weighted	19.7826563370598	25	0.75813146616101			GLIPR1	MR Egger	19.5567338605666	24	0.721684042808603
GLRX	Inverse variance weighted	40.1311514882788	26	0.0378712600645725			GLRX	MR Egger	36.0529687014432	25	0.0707999878647003
GLS	Inverse variance weighted	8.55852972213676	19	0.980115120959722			GLS	MR Egger	7.56933049814387	18	0.984382298985478
GNE	Inverse variance weighted	16.8937632029124	15	0.325254840464052			GNE	MR Egger	15.6969249426508	14	0.332230966537309
GPR137B	Inverse variance weighted	43.3935461299123	41	0.369679176375334			GPR137B	MR Egger	42.8458825568542	40	0.350072378072666
GRAMD3	Inverse variance weighted	1.95953603586165	12	0.99946537609196			GRAMD3	MR Egger	1.93975705202661	11	0.998696671319229
GS1-259H13.2	Inverse variance weighted	0.695114395769955	2	0.70641160752412			GS1-259H13.2	MR Egger	0.448617050157263	1	0.502992427833111
GTF2E2	Inverse variance weighted	15.8724095291081	22	0.82216730989206			GTF2E2	MR Egger	13.9500753950554	21	0.871734157304904
GTF2IRD2B	Inverse variance weighted	4.44529125200821	4	0.349083901296066			GTF2IRD2B	MR Egger	4.41967735313822	3	0.219567760621499
HERC6	Inverse variance weighted	9.08329573740296	12	0.695799880602967			HERC6	MR Egger	8.99034598545523	11	0.622783483677788
HLA-C	Inverse variance weighted	89.714	59	0.00610351752757894			HLA-C	MR Egger	89.1324557892283	58	0.00535921278468288
HLA-DQB1	Inverse variance weighted	62.2383049219274	46	0.0554067904453435			HLA-DQB1	MR Egger	61.7123386365638	45	0.0495069148518562
HLA-F	Inverse variance weighted	26.4897680663958	34	0.817399643878738			HLA-F	MR Egger	23.9218896038226	33	0.876182331825643
HNMT	Inverse variance weighted	21.1651897840225	26	0.733387499021653			HNMT	MR Egger	20.0159739267048	25	0.745986864503025
HNRNPH3	Inverse variance weighted	1.16665120239408	4	0.883558164431176			HNRNPH3	MR Egger	0.75788568543135	3	0.859511375654278
HPS1	Inverse variance weighted	27.2985949770802	27	0.447776886247997			HPS1	MR Egger	26.2577146817234	26	0.449010922760206
HRK	Inverse variance weighted	31.9062816357933	33	0.521428646623612			HRK	MR Egger	31.577800899489	32	0.487819184003529
HSD17B12	Inverse variance weighted	32.2821032473553	44	0.904631087829732			HSD17B12	MR Egger	30.7557323689599	43	0.918930817704577
HYAL3	Inverse variance weighted	27.7658746495098	40	0.928177705789209			HYAL3	MR Egger	27.6480675405948	39	0.912955247298829
IBA57	Inverse variance weighted	3.67957126024105	8	0.884815273144705			IBA57	MR Egger	2.60749781116659	7	0.918787233916186
IFFO1	Inverse variance weighted	12.5510470687559	19	0.860740858988486			IFFO1	MR Egger	11.2485595856481	18	0.883512665149868
IFIT1	Inverse variance weighted	8.17849551340483	7	0.31711794206578			IFIT1	MR Egger	4.56874858329171	6	0.600186685316394
IL15RA	Inverse variance weighted	16.4127856246144	21	0.746028313572245			IL15RA	MR Egger	16.0627687228798	20	0.712722625577386
IL6ST	Inverse variance weighted	3.29581923065383	3	0.348224953994891			IL6ST	MR Egger	2.14261516004352	2	0.342560299438337
INPP5D	Inverse variance weighted	16.7099071694116	19	0.609513684703474			INPP5D	MR Egger	14.0894151243235	18	0.723244074549465
KIAA1683	Inverse variance weighted	59.9322046431112	46	0.081458629395251			KIAA1683	MR Egger	53.5966666083567	45	0.177888440181616
KLHL7	Inverse variance weighted	9.19463489475105	13	0.758089852144344			KLHL7	MR Egger	7.7354040005807	12	0.80545080898094
LATS2	Inverse variance weighted	8.91566863570811	8	0.349459973684344			LATS2	MR Egger	8.91120715441298	7	0.259094059314931
LGALS2	Inverse variance weighted	56.8618674897447	73	0.918154335793815			LGALS2	MR Egger	56.0060871983855	72	0.917734034425973
LIPA	Inverse variance weighted	92.0652304871281	90	0.419804416175457			LIPA	MR Egger	86.7171427854494	89	0.548744407141721
LMBRD2	Inverse variance weighted	22.4463965666893	16	0.129353883579739			LMBRD2	MR Egger	22.4370434425907	15	0.0968459943444908
LRPPRC	Inverse variance weighted	28.4202753841668	32	0.6484273785626			LRPPRC	MR Egger	28.2704849085967	31	0.607170291329987
LRRCC1	Inverse variance weighted	4.04314351370274	7	0.774794923991074			LRRCC1	MR Egger	3.85684943340334	6	0.696041319885594
LUZP1	Inverse variance weighted	12.583282960187	14	0.55956625119677			LUZP1	MR Egger	12.2239625980998	13	0.50937004222066
MCCC2	Inverse variance weighted	3.07830277739326	5	0.687915117273553			MCCC2	MR Egger	2.42987956988958	4	0.657234389464972
MICA	Inverse variance weighted	42.9354019202475	39	0.306289003232171			MICA	MR Egger	35.0849213234274	38	0.604985508763769
MICB	Inverse variance weighted	41.0839243745644	25	0.0224951706523346			MICB	MR Egger	41.0838867841369	24	0.0163073823823176
MIS18A	Inverse variance weighted	7.9522257772741	5	0.158888287139226			MIS18A	MR Egger	6.5348672584614	4	0.162606679028399
MKNK2	Inverse variance weighted	8.04467305955489	13	0.840677765262482			MKNK2	MR Egger	7.95013936284365	12	0.789014589378018
MLC1	Inverse variance weighted	13.4208235160275	14	0.493687812110389			MLC1	MR Egger	13.3753431968016	13	0.419254896247666
MLXIP	Inverse variance weighted	1.89519309595925	5	0.863448719342981			MLXIP	MR Egger	1.72083126131973	4	0.786930211943199
MMEL1	Inverse variance weighted	12.2818609512392	20	0.906032923327246			MMEL1	MR Egger	12.1874879416382	19	0.877455596646403
MPV17L2	Inverse variance weighted	11.8311486226806	8	0.158898111876941			MPV17L2	MR Egger	10.6414512908029	7	0.155041389125093
MRPL39	Inverse variance weighted	12.7776189718866	13	0.465132136868475			MRPL39	MR Egger	8.98157637770378	12	0.704503249068633
MUS81	Inverse variance weighted	9.03918240985937	13	0.769977863964433			MUS81	MR Egger	9.03830741220113	12	0.699655032635695
MYO7B	Inverse variance weighted	12.4569617614668	16	0.711970252090494			MYO7B	MR Egger	12.4203618130942	15	0.64697256700613
NAB1	Inverse variance weighted	4.92043267961825	6	0.554058080311322			NAB1	MR Egger	3.45906062351619	5	0.629591130094867
NABP1	Inverse variance weighted	6.14416704176606	5	0.292442574255912			NABP1	MR Egger	1.41629041747457	4	0.841358778860102
NAE1	Inverse variance weighted	1.5347895800179	4	0.820461577469306			NAE1	MR Egger	1.22208777440592	3	0.747711771240078
NAGK	Inverse variance weighted	52.8173043738206	43	0.145020311504502			NAGK	MR Egger	50.4325638945438	42	0.174505586021545
NAIP	Inverse variance weighted	3.68649723285364	6	0.719014128609985			NAIP	MR Egger	3.18473411634619	5	0.671529645808951
NOL6	Inverse variance weighted	16.152351916571	21	0.761030793988051			NOL6	MR Egger	15.9068398319853	20	0.722386685464749
NRG1	Inverse variance weighted	86.0225534856804	72	0.124039232895502			NRG1	MR Egger	82.9700612869885	71	0.156663305247503
NSG1	Inverse variance weighted	77.5561784769626	68	0.200318297523179			NSG1	MR Egger	77.4808446160717	67	0.179047091792854
NYNRIN	Inverse variance weighted	6.05687695221818	10	0.81046225488819			NYNRIN	MR Egger	6.04574208809774	9	0.735331637935022
OAS2	Inverse variance weighted	2.04174815853979	4	0.728080289610657			OAS2	MR Egger	1.98037630625136	3	0.576489649914228
OASL	Inverse variance weighted	39.477859802125	42	0.582271576776611			OASL	MR Egger	39.3215960293207	41	0.545373821275007
OPTN	Inverse variance weighted	26.461643795328	23	0.279560813107837			OPTN	MR Egger	25.8968982292502	22	0.25613502782968
OSTM1	Inverse variance weighted	6.65295565322906	11	0.826451453289788			OSTM1	MR Egger	5.48166939937201	10	0.856771819719852
P2RX4	Inverse variance weighted	62.7076134625432	54	0.19487964683016			P2RX4	MR Egger	62.5845104999619	53	0.172593231212373
PANX2	Inverse variance weighted	37.7203314904906	26	0.0642759690568915			PANX2	MR Egger	37.2256903122175	25	0.05495063427798
PDE4DIP	Inverse variance weighted	0.437695587415822	2	0.803443998079352			PDE4DIP	MR Egger	0.0697381143926522	1	0.791718467288729
PDP1	Inverse variance weighted	2.82823812002396	6	0.830075426600884			PDP1	MR Egger	2.77969965977119	5	0.733904326042669
PECR	Inverse variance weighted	3.52870179893733	6	0.740147213512261			PECR	MR Egger	2.10826460949908	5	0.833970877422472
PFKM	Inverse variance weighted	15.1722541383606	19	0.711588173972345			PFKM	MR Egger	15.170137232697	18	0.650253577185342
PHACTR2	Inverse variance weighted	5.55488894398999	9	0.783506852677035			PHACTR2	MR Egger	5.46958556173306	8	0.70640728033636
PHLPP1	Inverse variance weighted	17.7644295562584	21	0.663859109330997			PHLPP1	MR Egger	16.2828041008848	20	0.698931812056037
PIEZO1	Inverse variance weighted	29.7871748533546	39	0.855814637114966			PIEZO1	MR Egger	28.201124887821	38	0.876987473555758
POR	Inverse variance weighted	56.6214388547064	55	0.41427202966015			POR	MR Egger	56.5381752736793	54	0.380384708507837
PQLC3	Inverse variance weighted	17.7538468672146	22	0.720478879408913			PQLC3	MR Egger	16.8288281542092	21	0.721428765116684
PRC1	Inverse variance weighted	6.89915764365328	7	0.439454610557283			PRC1	MR Egger	6.87897201708088	6	0.332185058123601
PRMT3	Inverse variance weighted	1.12386146872728	3	0.77131717582408			PRMT3	MR Egger	0.831092937588184	2	0.659979523928234
PRSS22	Inverse variance weighted	6.43875190748212	11	0.84254610432687			PRSS22	MR Egger	6.41809907026851	10	0.778999038263561
PTTG1IP	Inverse variance weighted	27.9619221029029	35	0.7950583149674			PTTG1IP	MR Egger	25.8873319816704	34	0.83951637735262
PVT1	Inverse variance weighted	11.2021058865042	19	0.916852669945977			PVT1	MR Egger	11.1835029570139	18	0.886407895540528
PYGB	Inverse variance weighted	62.2426120653879	66	0.608385083068279			PYGB	MR Egger	62.2424580834031	65	0.57402767315502
RAB27B	Inverse variance weighted	2.01416146515947	7	0.95905240392231			RAB27B	MR Egger	1.95359283237934	6	0.923916765780812
RAPGEF1	Inverse variance weighted	39.6403434509596	51	0.875704173106547			RAPGEF1	MR Egger	38.5358097360401	50	0.880985123402461
RBM26-AS1	Inverse variance weighted	14.9679008211837	16	0.526990777469218			RBM26-AS1	MR Egger	14.6228424381845	15	0.478909943608709
RCSD1	Inverse variance weighted	22.8799994902874	32	0.882042369041059			RCSD1	MR Egger	22.1414245753519	31	0.878520221632497
RHPN2	Inverse variance weighted	3.83704744117197	9	0.921806432846093			RHPN2	MR Egger	3.0109006522317	8	0.933671608213807
RNF144B	Inverse variance weighted	60.3410673738627	52	0.199764334791527			RNF144B	MR Egger	58.2583149735087	51	0.225878967696829
RTN4IP1	Inverse variance weighted	15.6999446559974	16	0.474091457405672			RTN4IP1	MR Egger	14.4360472565552	15	0.492748155326357
SCARB1	Inverse variance weighted	61.9126054219951	33	0.00168420758763716			SCARB1	MR Egger	61.8311438680406	32	0.00119469259869054
SCFD2	Inverse variance weighted	8.02967490505098	4	0.0904971931300317			SCFD2	MR Egger	3.75263517755562	3	0.289443731605433
SCG5	Inverse variance weighted	1.76829176510255	2	0.413066830239576			SCG5	MR Egger	0.417633565613029	1	0.518120217033909
SFXN1	Inverse variance weighted	7.76096110728428	11	0.734543103759253			SFXN1	MR Egger	7.59739582203288	10	0.668096664236289
SGOL2	Inverse variance weighted	0.48501186675783	2	0.784659091885199			SGOL2	MR Egger	0.422613430610178	1	0.515635865527886
SIN3B	Inverse variance weighted	20.8486390905729	20	0.406089300355893			SIN3B	MR Egger	20.7321379041015	19	0.351788609759157
SIPA1L2	Inverse variance weighted	30.6130324046646	37	0.761557025721008			SIPA1L2	MR Egger	30.2152151321361	36	0.739676178243289
SKIL	Inverse variance weighted	1.69866758476419	2	0.427699773903803			SKIL	MR Egger	0.97547008436831	1	0.323319734107241
SKP2	Inverse variance weighted	21.731562020058	19	0.297818997354873			SKP2	MR Egger	17.9228148115981	18	0.460748188502339
SLC1A4	Inverse variance weighted	15.6496935744024	21	0.788999207259702			SLC1A4	MR Egger	15.3024678945384	20	0.758846606170606
SLC35B3	Inverse variance weighted	17.6314524628589	20	0.611671935805334			SLC35B3	MR Egger	16.5398948868571	19	0.621007574053177
SMURF2	Inverse variance weighted	0.83795680929668	2	0.657718398774566			SMURF2	MR Egger	0.410086852558482	1	0.521925425723741
SNRNP70	Inverse variance weighted	3.43821299946289	5	0.632756712621283			SNRNP70	MR Egger	1.70226412046184	4	0.790306302612505
SNX29	Inverse variance weighted	38.9835897250374	48	0.820138801548943			SNX29	MR Egger	34.5066542960491	47	0.912147087022393
SORBS1	Inverse variance weighted	0.896414948177771	2	0.638772141614746			SORBS1	MR Egger	0.767701476479686	1	0.380929059533939
SPTLC2	Inverse variance weighted	44.8211101673389	43	0.395355400672441			SPTLC2	MR Egger	43.9875190836888	42	0.387413626264881
SRD5A3	Inverse variance weighted	37.478769366633	46	0.810397963141993			SRD5A3	MR Egger	36.0739901546219	45	0.826361182116386
SRR	Inverse variance weighted	34.4332062123998	48	0.929510790109283			SRR	MR Egger	34.304409006741	47	0.916178678032194
SSH1	Inverse variance weighted	12.1695709574756	13	0.513790503423049			SSH1	MR Egger	12.1663783790404	12	0.432411841287897
STAMBP	Inverse variance weighted	10.9549516179657	11	0.447044995166772			STAMBP	MR Egger	6.94532099279915	10	0.730596709866926
STEAP3	Inverse variance weighted	58.9062210702083	52	0.237583625849845			STEAP3	MR Egger	58.8443026440236	51	0.210301104429894
STMN3	Inverse variance weighted	25.1557180454778	29	0.670142325600901			STMN3	MR Egger	20.9678072099707	28	0.826688668507284
TBC1D8	Inverse variance weighted	22.3111284255951	27	0.721404475547628			TBC1D8	MR Egger	18.4888411841159	26	0.857271036373794
TLE1	Inverse variance weighted	6.96419977845616	7	0.432616875781418			TLE1	MR Egger	3.96293705671561	6	0.681692195899549
TMEM110	Inverse variance weighted	21.3241894330154	17	0.212123949680485			TMEM110	MR Egger	21.2356145886356	16	0.169630582534303
TMEM245	Inverse variance weighted	62.2299859147336	45	0.0451511143611077			TMEM245	MR Egger	62.1971474057631	44	0.0365884307610439
TMEM88	Inverse variance weighted	6.26160655619888	8	0.617953726971228			TMEM88	MR Egger	5.75075553666934	7	0.569135085349674
TMEM97	Inverse variance weighted	31.1914789933957	57	0.997881822037885			TMEM97	MR Egger	30.999289267008	56	0.99730907739762
TMOD2	Inverse variance weighted	41.877445923663	51	0.814992220261984			TMOD2	MR Egger	41.862400896959	50	0.786681990471408
TPM1	Inverse variance weighted	50.0271379432297	36	0.0601673197690735			TPM1	MR Egger	49.7377722528326	35	0.0506289144169949
TPM2	Inverse variance weighted	104.61986939199	86	0.0840157518181489			TPM2	MR Egger	104.315627340096	85	0.0760218906073101
TPP1	Inverse variance weighted	26.0444141124483	28	0.570603137134498			TPP1	MR Egger	26.0274829642492	27	0.517075532993461
TRAPPC6A	Inverse variance weighted	11.3891485773964	15	0.72455219317523			TRAPPC6A	MR Egger	11.0884731098039	14	0.679072107492936
TRIM59	Inverse variance weighted	7.18285102492762	10	0.708077296192618			TRIM59	MR Egger	6.41537819733875	9	0.697732528097493
TRIOBP	Inverse variance weighted	20.3147276935016	33	0.958921871258714			TRIOBP	MR Egger	19.9435804766813	32	0.952232091140453
TSPAN10	Inverse variance weighted	0.147514249397814	5	0.999578199303263			TSPAN10	MR Egger	0.130607083233075	4	0.997958319608651
ULK1	Inverse variance weighted	0.114363360462869	3	0.990059740445194			ULK1	MR Egger	0.114363289015111	2	0.944422504624322
UPP1	Inverse variance weighted	27.0070340539537	29	0.571325577653192			UPP1	MR Egger	26.3281795744418	28	0.555010747082301
UQCR10	Inverse variance weighted	8.57142563708815	7	0.284906864598385			UQCR10	MR Egger	8.25578674464834	6	0.219956302577435
UROS	Inverse variance weighted	46.0658841150225	42	0.307721015074958			UROS	MR Egger	46.0642805832292	41	0.270686585534642
USP36	Inverse variance weighted	40.9044793037212	49	0.787952157410744			USP36	MR Egger	40.9022226551015	48	0.75633873254147
UVRAG	Inverse variance weighted	8.62780743141592	13	0.800436730525409			UVRAG	MR Egger	8.48134361536902	12	0.746475260986105
XBP1	Inverse variance weighted	31.0016430015107	34	0.615359394531488			XBP1	MR Egger	30.8738057900247	33	0.573359860940703
ZNF19	Inverse variance weighted	0.901971598961327	3	0.824951990900604			ZNF19	MR Egger	0.90099273478067	2	0.637311732336753
ZNF285	Inverse variance weighted	3.0978545928938	2	0.212475775142201			ZNF285	MR Egger	2.50275289259591	1	0.113647485871375
ZNF713	Inverse variance weighted	17.548495378887	15	0.287145434398778			ZNF713	MR Egger	17.5408386143315	14	0.228499822209496
ZNF777	Inverse variance weighted	1.0184257168227	2	0.600968439936062			ZNF777	MR Egger	0.415986409685094	1	0.518946572425829

## Sheet: Table S6
Table S6. Results of MR Egger intercept horizontal pleiotropy test
gene	intercept	se	pval
ABCA1	-0.0809502	0.110931690441881	0.474945280774762
ABCB4	0.0436337098441594	0.111009023960308	0.703419987716168
ABCC3	0.0512252438004235	0.0430058922433001	0.238145983986227
ABHD14A	0.128107774699912	0.171760693806771	0.533505629591825
ACAT1	0.0629907120985851	0.0661919191278303	0.353885539662913
AKR1C3	-0.0226709	0.0933420216848385	0.81084464702395
ANKRD10-IT1	0.257054510695265	0.183991474039054	0.25678845192695
ANKRD10	0.0436541595815613	0.06446358877998	0.503151473812712
ANKRD16	0.24066499617769	0.291144523762898	0.56024764147491
ANKRD37	-0.229544	0.282091651849972	0.565155144900768
ANO10	0.0521877300756838	0.157135094279396	0.746040990300236
APH1B	-0.0661403	0.0461550476833212	0.161555640895921
ARHGAP11A	0.0523768243361453	0.110108070899077	0.648784978981072
ARHGAP26	-0.191178	0.159746000277576	0.276535597555867
ARPC1B	-0.0575123	0.132024418690077	0.673374238551724
ARSA	0.0172521346056796	0.0434028272688977	0.693231177269404
ATF3	-0.168384	0.229032084200683	0.515477633777169
ATHL1	-0.107922	0.0534653964504349	0.0525529905107049
AUTS2	-0.0134307	0.070265151547524	0.849458766047052
BBS9	-0.286588	0.153536061708881	0.104199707170327
BCCIP	-0.117964	0.132518448906029	0.402929384730887
C12orf73	-0.96017	0.612620697591241	0.257561414979743
C17orf51	-0.0131779	0.0736277315800997	0.860939621246736
CBX6	-0.00498866	0.0635558124634168	0.937994460931782
CCDC88A	0.0234399446987759	0.100697558033177	0.820630727576314
CD14	0.0378849525933879	0.10113693815705	0.71125447485633
CD9	-0.00226316	0.0506827374151585	0.964623598328095
CHPF2	0.0674032518730113	0.0974914698971983	0.503659614705856
CITED4	-0.0649756	0.0502454761051723	0.20376135576134
CLCN7	-0.0297741	0.0501755566198381	0.557853008353027
CLHC1	0.00352456860370719	0.036814818358051	0.924064642671385
CLIC4	0.0311846286908735	0.0690983177895262	0.657471614422096
CLMN	0.0158257053771404	0.0672342756840159	0.815995808525873
CLTCL1	0.0289558410477842	0.0912887758889856	0.75409041080284
COX11	0.0841270265476635	0.0807033403298818	0.308535959592503
CRABP2	0.167089453214299	0.121729279672643	0.218963167505537
CREBRF	0.0590122153308619	0.0920094604073865	0.529364483194485
CSTA	0.00738718821623431	0.0512938031562595	0.886089871558036
DCAF4	0.0452950263232285	0.0431353776898346	0.297460319101306
DDR1	0.0246423484737843	0.064532065084712	0.705790320258819
DDX60L	0.0218192054622905	0.0494106213365497	0.660653080363228
DGAT2	0.0516618941084577	0.120419532433011	0.685767869721993
DNASE2	-0.00800625	0.0522788984042894	0.878984197532943
DNM1L	0.201693775514865	0.110527481049743	0.101323921098136
DNTT	0.0586217130519056	0.141380869194477	0.706273788419426
EEF1A1	0.00093927146784976	0.0592331961104011	0.987427162243765
EGLN3	0.144446958586119	0.143550919071941	0.338026282247028
EID2B	0.229916394914335	0.197227429188307	0.308489825909012
EIF4E	0.130552895847257	0.0870252651290012	0.155781151695891
EXOC7	0.203911865737503	0.264688319882547	0.582109881915192
FAM213A	0.0419415018697793	0.0843037639334144	0.622234842209081
FAM49A	0.193206531656068	0.140363627963382	0.201949684967141
FDFT1	0.0986845341436679	0.0419769203301072	0.0205080269208453
FHAD1	0.0418491445077796	0.117100419678202	0.729045644271303
FLNB	0.170323825245167	0.0714779936237388	0.0284063218208421
G2E3	0.166490397579685	0.146148048218746	0.3726830105344
GBP3	0.0622053973995484	0.0393522738615082	0.117986213600462
GFI1	0.108378756956545	0.133587395597965	0.462710466594217
GFPT1	0.0667425354207748	0.0594071119051023	0.267192888940725
GLIPR1	0.0346226643847102	0.072841816232755	0.63886130846846
GLRX	0.139401820036011	0.0828963887820954	0.105090890526529
GLS	-0.0960286	0.0965514365630956	0.333121266402604
GNE	-0.117258	0.113492361833875	0.319039892628042
GPR137B	-0.0349211	0.0488377138522496	0.478735167386416
GRAMD3	-0.0137943	0.0980835902503818	0.890698413246637
GS1-259H13.2	0.469768003745451	0.946187725520186	0.70662546023424
GTF2E2	0.101654606306583	0.0733183400678035	0.180144327907183
GTF2IRD2B	0.0287453709333886	0.218004133199647	0.903443787491827
HERC6	0.0250447914500888	0.0821473015831451	0.766151069468248
HLA-C	-0.0529458	0.0860661196953215	0.540845244962701
HLA-DQB1	0.0344635260322754	0.0556494019004064	0.538843463262024
HLA-F	-0.148828	0.0928744646647522	0.118584175236872
HNMT	0.0727556415369395	0.0678681278949542	0.293953378092378
HNRNPH3	0.108159012606485	0.169170871990557	0.568069007289107
HPS1	0.0669458511877188	0.0659424475739926	0.319357508284927
HRK	0.0313399999143517	0.0546819556335213	0.570560993461686
HSD17B12	0.0649585412490102	0.0525782621914802	0.223365505024966
HYAL3	-0.035199	0.102552088817746	0.733268517228037
IBA57	-0.103568	0.100025971155166	0.334916530121283
IFFO1	-0.0765296	0.067056771989263	0.268715975625957
IFIT1	0.211342755501684	0.111236928271001	0.106179630790205
IL15RA	0.0382470559032299	0.0646477631318492	0.560732100494524
IL6ST	-0.289236	0.27877639793642	0.408477332615013
INPP5D	0.118627959916645	0.073281717434202	0.122879857324683
KIAA1683	0.120252337510909	0.0521392054878925	0.0257505588176764
KLHL7	0.10656211183249	0.0882146693893901	0.250320900442646
LATS2	-0.00858897	0.145084496285399	0.954447566891303
LGALS2	-0.0305017	0.0329717730980282	0.358012490015612
LIPA	-0.0771052	0.0333414359946243	0.023051641161768
LMBRD2	0.00925533065763462	0.117044436633985	0.938017966895696
LRPPRC	-0.0196282	0.0507152854999097	0.701379951393332
LRRCC1	-0.0621226	0.143929622140841	0.68109723345712
LUZP1	0.0486173417633787	0.0811054979557467	0.559186735699793
MCCC2	0.1347947760429	0.167395502890204	0.465817765111873
MICA	0.137327419586164	0.0490127575440841	0.00795056435532265
MICB	-0.000333861	0.0712453612778292	0.996299807635866
MIS18A	0.136416303782824	0.146458576396554	0.404356400293827
MKNK2	0.0278864625565204	0.0906985003303167	0.763761467491959
MLC1	0.0198784601401755	0.0945478762616568	0.83673388310717
MLXIP	0.0618808036524348	0.148193866839858	0.697703822853847
MMEL1	-0.033934	0.110461609310536	0.762031386293354
MPV17L2	0.149701723034934	0.169223224417991	0.405709684996681
MRPL39	0.210394851458159	0.10798652594391	0.0751443381151369
MUS81	-0.00283446	0.0958225278157993	0.976888002324426
MYO7B	-0.015752	0.0823368910655803	0.850847347636925
NAB1	0.254301321080848	0.210362448442161	0.280754206874376
NABP1	0.495971381592721	0.228099088704236	0.095343016702501
NAE1	0.0886153556702676	0.158468807729772	0.615057798820484
NAGK	0.0619457786567156	0.0439563915297767	0.166121193825243
NAIP	0.108590596751671	0.153300246331346	0.510373913033084
NOL6	0.0346916237589489	0.0700145320956942	0.625653454906553
NRG1	-0.0846017	0.0523460094757846	0.110485672519765
NSG1	0.0101419411337404	0.0397361461550099	0.799325693015565
NYNRIN	0.00921577952366789	0.0873352595783012	0.918276152681042
OAS2	0.0419830321800026	0.169468578372698	0.820328667085649
OASL	0.0255212264697701	0.0645613181137902	0.694669239375899
OPTN	-0.0395915	0.0571594832825117	0.495776345058206
OSTM1	-0.12189	0.112625530106004	0.304543440792165
P2RX4	0.0137213453419471	0.0424969671926312	0.748057860494578
PANX2	-0.0552121	0.0957944503087669	0.569525216932733
PDE4DIP	-0.146493	0.241499774988367	0.652880111156453
PDP1	0.0361863486367028	0.164248633619017	0.834339380324783
PECR	0.156546751489242	0.131350896958185	0.2868105232786
PFKM	0.004619895276236	0.10041101997491	0.963809021279643
PHACTR2	-0.0397569	0.136122358807037	0.777665973373245
PHLPP1	0.0926270770493179	0.0760972117393855	0.237688611784228
PIEZO1	0.0558572531125117	0.0443528102219295	0.215572316527911
POR	0.0130178350045322	0.0461620656340503	0.779019295121551
PQLC3	0.0623904300737068	0.0648698240653139	0.347105207286277
PRC1	-0.0155959	0.117537230594133	0.89877747559728
PRMT3	-0.0949544	0.175490253130361	0.642659623408679
PRSS22	-0.0186413	0.129714089594925	0.888583488899841
PTTG1IP	-0.0814727	0.0565647900180917	0.158915852677655
PVT1	-0.00932593	0.0683756492240306	0.893024845709335
PYGB	0.00049646684973697	0.0400087790525677	0.990137354943013
RAB27B	-0.0434263	0.176452757286673	0.813802435877154
RAPGEF1	0.0489126176291056	0.0465405398818412	0.298326396349192
RBM26-AS1	0.0318853077735637	0.0542805603059485	0.565662162696116
RCSD1	0.0438475810596127	0.0510209291169106	0.396715037385898
RHPN2	0.0937562925413882	0.103150613626367	0.389949732948733
RNF144B	0.0801187020207179	0.0593347278224806	0.182887070157385
RTN4IP1	0.0879756789489594	0.0782540308182654	0.278584496680101
SCARB1	0.0165516663263379	0.0806109480245537	0.838616639620417
SCFD2	0.211256780404152	0.114247461723087	0.161566574229333
SCG5	-0.363578	0.312841555165275	0.452338393685743
SFXN1	-0.0359025	0.088772688232057	0.694409702205257
SGOL2	-0.0799823	0.320189413116416	0.844163502892458
SIN3B	-0.0200087	0.0612347517979918	0.747426668344441
SIPA1L2	-0.0358097	0.0567752290782723	0.532202661632579
SKIL	0.140543193477222	0.165265179370796	0.55135357552625
SKP2	0.127649266849102	0.0654074548847395	0.0667235162918435
SLC1A4	-0.0377819	0.0641176465575881	0.562285559274103
SLC35B3	-0.0809587	0.0774890204048481	0.309237386967529
SMURF2	0.127691370093538	0.195211613130148	0.631228788756635
SNRNP70	0.433769554462053	0.329223327827542	0.258050837548468
SNX29	0.11264338590163	0.0532372092198276	0.0396815277054368
SORBS1	-0.1272	0.354547813800173	0.780707878617005
SPTLC2	-0.0410941	0.0460620026917277	0.377397184748763
SRD5A3	0.048373441529072	0.0408134164288756	0.242146497357436
SRR	-0.0200961	0.0559961782888022	0.721289624944224
SSH1	-0.00495207	0.0882481950530294	0.956173523826857
STAMBP	0.196865057016868	0.0983142462046987	0.0730943315234779
STEAP3	0.0144750245398817	0.0624851010209404	0.817732483075178
STMN3	0.10478920266586	0.051205642826433	0.0502059072446843
TBC1D8	-0.143622	0.0734615501223489	0.0614051102028707
TLE1	-0.243428	0.140513662653619	0.133907116854164
TMEM110	0.0230273245703557	0.0891375533478139	0.799442259433912
TMEM245	0.00760361998019655	0.049887022449424	0.879554998589888
TMEM88	0.0960425184173651	0.134374359545171	0.497907774075765
TMEM97	0.0178838643629446	0.0407939992085314	0.662786938642396
TMOD2	0.00732065234316474	0.0596833650325031	0.902869488500897
TPM1	-0.0292082	0.0647277612785982	0.6545951268979
TPM2	-0.0196107	0.0393865704833781	0.619838447884988
TPP1	-0.00858008	0.0659398522158397	0.897436281546298
TRAPPC6A	-0.0474732	0.0865763226312557	0.592096299128991
TRIM59	0.119560646554382	0.136476146324567	0.40377548513975
TRIOBP	-0.0303903	0.0498841395221429	0.546680932816995
TSPAN10	-0.0493155	0.379269744834378	0.902821312555659
ULK1	-4.60651e-05	0.172336588997242	0.999810992387541
UPP1	-0.0618582	0.0750773174668051	0.416944772288973
UQCR10	-0.0935592	0.195341754349864	0.648928256891332
UROS	0.00226774191441852	0.0600267814420918	0.970047371440754
USP36	0.00258054565868588	0.0543224785649365	0.962308490711654
UVRAG	0.0473187744692823	0.123642653090376	0.708630292398295
XBP1	0.0204488084702444	0.0571925371314807	0.722961786394587
ZNF19	0.0102924658174089	0.328971454457467	0.977882299763752
ZNF285	0.182333722036878	0.373921457512458	0.711166071020217
ZNF713	0.00679596907607102	0.0869340487184147	0.938796088452016
ZNF777	0.201710500341435	0.259879400629864	0.579805235265454

## Sheet: Table S7
Table S7.Results of SMR and HEIDI test between 16 targets expression and NPC
probeID	ProbeChr	Trait	Probe_bp	topSNP	topSNP_chr	topSNP_bp	A1	A2	Freq	b_GWAS	se_GWAS	p_GWAS	b_eQTL	se_eQTL	p_eQTL	b_SMR	se_SMR	SMR_pval	p_HEIDI	nsnp_HEIDI	or	or_lci95	or_uci95
ENSG00000179862	1	CITED4	41326729	rs12751530	1	41356780	G	A	0.114314	-0.416994	0.182558	0.0223609	0.462656	0.0342773	1.618711e-41	-0.901305	0.400197	0.0243127	0.317011	19	0.406039432383238	0.185316311878431	0.889657359241297
ENSG00000181873	1	IBA57	228353516	rs4653919	1	228373962	A	G	0.332008	-0.266681	0.124893	0.0327378	0.474448	0.0340071	3.082375e-44	-0.562087	0.266304	0.0347983	0.895447	20	0.570018193637871	0.338225366802747	0.960663430273327
ENSG00000173559	2	NABP1	192542794	rs34793653	2	192574360	T	C	0.770378	-0.297008	0.118264	0.0120254	-0.215089	0.0181011	1.457213e-32	1.38086	0.561984	0.0140056	0.467514	20	3.97832151323448	1.32229830140011	11.9693431095736
ENSG00000170458	5	CD14	140011313	rs2563315	5	140008505	G	A	0.270378	-0.310526	0.121806	0.0107927	0.138095	0.0213087	9.130266e-11	-2.24864	0.947837	0.0176734	0.825048	5	0.105542665024674	0.0164669404018568	0.676461678288127
ENSG00000165271	9	NOL6	33461439	rs2275228	9	33467577	C	T	0.202783	0.269634	0.13194	0.0409921	0.218056	0.0176197	3.538028e-35	1.23654	0.613268	0.0437681	0.903443	20	3.44367770295004	1.03513796774244	11.4563628147644
ENSG00000198467	9	TPM2	35681989	rs3793540	9	35689951	T	A	0.275348	-0.275766	0.13413	0.0397869	-0.248666	0.0241112	6.134834e-25	1.10898	0.550012	0.04377	0.946115	20	3.03126492681004	1.03144061461419	8.90847900142625
ENSG00000107521	10	HPS1	100175955	rs701801	10	100176869	T	C	0.284294	0.283648	0.128401	0.0271694	0.197409	0.0219956	2.835656e-19	1.43685	0.669845	0.0319484	0.414415	20	4.20742154313052	1.13196357307403	15.638662287979
ENSG00000172732	11	MUS81	65624597	rs558114	11	65632262	T	G	0.667992	-0.285025	0.113234	0.0118315	0.129388	0.0224869	8.718897e-09	-2.20287	0.955228	0.0211039	0.541396	10	0.110485609198852	0.0169902287429779	0.718475897217491
ENSG00000075239	11	ACAT1	107992243	rs35219733	11	107989244	T	G	0.157058	0.335032	0.15285	0.0283864	0.183608	0.0301548	1.137292e-09	1.82471	0.884778	0.0391753	0.948507	9	6.20099646935164	1.09477090259041	35.123656576848
ENSG00000010295	12	IFFO1	6647541	rs2286726	12	6659694	C	G	0.2833	-0.246283	0.119047	0.0385665	-0.301783	0.0251952	4.643735e-33	0.816093	0.40032	0.0414896	0.726319	18	2.26164630131235	1.03196608175213	4.95660088319494
ENSG00000139278	12	GLIPR1	75874460	rs2242435	12	75874913	A	G	0.415507	0.269583	0.117489	0.0217591	-0.143432	0.014866	4.995847e-22	-1.87952	0.841972	0.0255964	0.899923	20	0.15266336658884	0.0293112135839647	0.795125846000067
ENSG00000198826	15	ARHGAP11A	32907345	rs60252695	15	32911105	C	T	0.275348	-0.345857	0.129054	0.00736343	-0.206541	0.0251347	2.080009e-16	1.67452	0.657224	0.0108384	0.801596	14	5.33623314233243	1.47161576938442	19.3497411088754
ENSG00000167720	17	SRR	2206677	rs3744270	17	2207326	A	G	0.341948	0.258651	0.121387	0.0331063	-0.58592	0.0423563	1.609002e-43	-0.441444	0.209617	0.0352079	0.734971	20	0.643107103619785	0.426435855833514	0.969868600560874
ENSG00000254858	19	MPV17L2	18303992	rs62120366	19	18299171	A	C	0.354871	0.300835	0.111894	0.00717579	0.182925	0.0294261	5.086478e-10	1.64458	0.666452	0.0135997	0.175101	17	5.17883433968869	1.40260900875948	19.1217402358337
ENSG00000100994	20	PYGB	25228705	rs6132821	20	25226192	G	A	0.457256	0.24834	0.115129	0.0310006	0.512525	0.024018	4.916197e-101	0.484542	0.225776	0.0318633	0.779035	20	1.6234313070109	1.04291642148143	2.52707614368505
ENSG00000073150	22	PANX2	50609160	rs730559	22	50633048	G	T	0.217694	-0.362285	0.15121	0.0165798	0.117988	0.0200797	4.203085e-09	-3.07052	1.38401	0.0265161	0.485437	5	0.0463970221319578	0.00307891012542419	0.699170672419937
